# Supplementary material for: Unveiling the dual activation effect of NHC-catalyst in an asymmetric reaction system
Source: Royal Society of Chemistry journal article supplement (doi:10.1039/d4qo00660g), 2024-01-01
Supplement: d4qo00660g1.pdf [file d4qo00660g1.pdf]

# Unveiling the Dual Activation Effect of NHC-Catalyst in One Asymmetric Reaction System

Wei Wang<sup>1,†</sup>, Xiaolin Peng<sup>1,†</sup>, Xiaoyan Yang<sup>1</sup>, Yonggui Robin Chi<sup>1,3,\*</sup>, and Gefei Hao<sup>1,2,\*</sup>

<sup>1</sup> State Key Laboratory of Green Pesticide; Key Laboratory of Green Pesticide and Agricultural Bioengineering, Ministry of Education; Center for R&D of Fine Chemicals of Guizhou University, Guizhou University, Guiyang, 550025, China

<sup>2</sup> State Key Laboratory of Public Big Data, Guizhou University, Guiyang 550025, P. R. China

<sup>3</sup> School of Chemistry, Chemical Engineering, and Biotechnology, Nanyang Technological University, Singapore 637371, Singapore.

---

\*Corresponding authors

Yonggui Robin Chi, Email: robinchi@ntu.edu.sg

Gefei Hao, Email: gefei\_hao@foxmail.com

†These authors contributed equally to this work.

## Table of Contents

|                                                                     |     |
|---------------------------------------------------------------------|-----|
| Part 1. Method .....                                                | S3  |
| Part 2. Discussion of NHC-catalyzed homo-coupling.....              | S8  |
| Part 3. Discussion of the chemoselectivity for proton transfer..... | S9  |
| Part 4. Active effect of Brønsted acid Pre-NHC on substrate R2..... | S11 |
| Part 5. NHC cycle of the optimal pathway.....                       | S13 |
| Part 6. Discussion of self-cyclization.....                         | S14 |
| Part 7. Discussion about the effect of substituents of R2.....      | S16 |
| Part 8. Thermodynamics parameters of stationary points.....         | S17 |
| Part 9. Cartesian coordinates of stationary points.....             | S21 |

## Part 1. Method

### 1 Calculation details

To explore the reaction mechanism in more detail, we performed density functional theory (DFT) calculations using Gaussian 16 B.01.<sup>1</sup> Geometry optimizations were performed using the M06-2X functional<sup>2</sup> with the dispersion correction D3<sup>3</sup>, and basis set 6-31G(d, p)<sup>4-7</sup> was employed. The solvent module IEF-PCM (THF) was employed for simulating solvent condition.<sup>8</sup> Minima and transition structures on the potential energy surface were confirmed using frequency analysis at the same level of theory, showing respectively zero and only one imaginary frequency. Gibbs energies were evaluated at the room temperature (298.15 K). Single point corrections were through the high-level basis set 6-311++G (3d2f, 3p2d)<sup>9-11</sup>.

### 2 Calculating analyses methods

In the main text, we mainly employed reactive index, non-covalent interaction, and distortion energy analyses to explain the phenomena in the reaction:

- (1) Non-covalent interaction (NCI) analysis and quantitative atom-in-molecule (AIM)<sup>12</sup> analysis were plotted by using Multiwfn 3.8(dev)<sup>13</sup> and VMD 1.9.3<sup>14</sup>.
- (2) Reactive index analysis is including global reactive index and local reactive index. For the global reactive index, it can be parted global electrophilic index ( $\omega$ ) and global nucleophilic index (N). Global electrophilic index ( $\omega$ ) can be calculated by the equation  $\omega = \mu^2 / 2\eta$ .<sup>15</sup> Here,  $\mu$  is electronic chemical potential and can be obtained by the equation  $\mu = (E_{\text{HOMO}} + E_{\text{LUMO}}) / 2$ ,  $\eta$  is chemical hardness and can be gotten by the equation  $\eta = E_{\text{HOMO}} - E_{\text{LUMO}}$ .<sup>16-18</sup> Global nucleophilic index (N) can be calculated by the equation  $N = E_{\text{HOMO}} - E_{\text{HOMO}}(\text{TCE})$ . Here, global nucleophilic index is referred to tetracyanoethylene (TCE).<sup>19</sup> For the local reactive index, it can be parted local electrophilic index ( $\omega_k$ ) and local nucleophilic index ( $N_k$ ). First, the nucleophilic ( $P_k^-$ ) and electrophilic ( $P_k^+$ ) Parr functions should be obtained. Parr functions allow for the characterization of the nucleophilic and electrophilic sites of a molecule, can be obtained through the analysis of Mulliken atomic spin density (ASD)  $\rho_s(r)$  of the corresponding radical cations (rc) or anions (ra) of the studies molecules, separately. That is said that  $P_k^+ = \rho_s^{\text{rc}}(r)$  and  $P_k^- = \rho_s^{\text{ra}}(r)$ . Then, local electrophilic index can be

calculated by the equation  $\omega_k = \omega \times P_k^+$ , local nucleophilic index can be calculated by the equation  $N_k = N \times P_k^-$ .<sup>20, 21</sup>

(3) Distortion energy analysis is based on the equation  $E_{\text{inter}} = E_{\text{act}} - E_{\text{dist}}$ . When the activation energy is a constant, high distortion energy means a low interaction energy. The low interaction energy goes against the generation of transition state and subsequent intermediates.

(4) The extent of enantioselectivity, in terms of enantiomeric excess (*e.e.*), was also calculated by using the Boltzmann distribution of diastereomeric transition states with the equation  $e.e. = (A-1)/(A+1) \times 100\%$  (Here,  $A = R/S$ ,  $R/S = \exp(-\Delta\Delta G^\ddagger/RT)$ , and  $-\Delta\Delta G^\ddagger = -\Delta G_{\text{R}}^\ddagger - (-\Delta G_{\text{S}}^\ddagger)$ )

### 3 Comparison among different methods

To prove rationality of the density functional M06-2X in the reaction system, we added calculations for the four key transition states **TS4C-RR**, **TS4C-RS**, **TS4C-SR**, and **TS4C-SS** with other density functionals  $\omega$ B97X-D<sup>22</sup> and B3LYP<sup>23</sup>. For geometries optimization, the basis set 6-31G(d,p) was employed. For single point corrections, we used the high-level basis set 6-311++G(3d2f, 3p2d). Furthermore, the situations of the dispersion correction D3 and D3(BJ)<sup>24</sup> used in B3LYP and M06-2X without D3 were also calculated.

**Table S1.** Comparisons of relative Gibbs free energies for key transition states ( $\Delta\Delta G^\ddagger$ ) with different methods (unit: kcal/mol)

|         | M06-2X-<br>D3 | M06-2X | $\omega$ B97X-D | B3LYP | B3LYP-D3 | B3LYP-<br>D3(BJ) |
|---------|---------------|--------|-----------------|-------|----------|------------------|
| TS4C-RR | 10.0          | 9.9    | 9.5             | 15.8  | 10.7     | 10.9             |
| TS4C-RS | 9.7           | 10.4   | 14.0            | 17.4  | 10.5     | 10.8             |
| TS4C-SR | 0             | 0      | 0               | 0     | 0        | 0                |
| TS4C-SS | 7.1           | 6.0    | 4.6             | 2.0   | 6.9      | 6.3              |

As shown in **Table S1**, besides the results from B3LYP, there are little differences between the results calculated by those methods and the results calculated by the selected method and the various levels lead to the same conclusion. For the strange

results from B3LYP, the main reason is that B3LYP is not good at processing the long-range interactions among reaction fragments. When B3LYP with D3 and D3(BJ) were employed, they got much better results (**Table S1**). Therefore, we obtained three results: (1) the selected method M06-2X-D3 is reliable for the reaction systems in our work; (2) although  $\omega$ B97X-D has dispersion correction D2 to process the long-range interactions among reaction fragments, D2 brings still more obvious errors for the results; and (3) B3LYP-D3(BJ) and B3LYP-D3 have also good performance to process the long-range interactions among reaction fragments in this reaction system, which are like M06-2X-D3.

#### 4 Analysis and discussion of different basis sets

To correct the energy error from overlap integral (S integral) of double  $\zeta$  basis set 6-31G(d,p), the calculations of single point by higher level triple  $\zeta$  basis set are necessary. Here, we chose two high-level triple  $\zeta$  basis sets 6-311++G(2d,2p)<sup>9, 10</sup> and 6-311++G(3d2f, 3p2d) to execute single point corrections for the four key transition states **TS4C-RR**, **TS4C-RS**, **TS4C-SR**, and **TS4C-SS**.

**Table S2.** Comparisons of relative Gibbs free energies for key transition states ( $\Delta\Delta G^\ddagger$ ) with corrections by two different high level basis sets (unit: kcal/mol)

|         | M06-2X-D3/<br>6-311++G(2d,2p) | M06-2X-D3/<br>6-311++G(3d2f, 3p2d) |
|---------|-------------------------------|------------------------------------|
| TS4C-RR | 11.3                          | 10.0                               |
| TS4C-RS | 10.7                          | 9.7                                |
| TS4C-SR | 0                             | 0                                  |
| TS4C-SS | 6.7                           | 7.1                                |

As shown in **Table S2**, there are no obvious differences between the results from the two high level triple  $\zeta$  basis sets 6-311++G(2d,2p) and 6-311++G(3d2f, 3p2d). it is suitable that we chose 6-311++G(3d2f, 3p2d) to correct the energy error, with comparing with the more commonly used basis set 6-311++G(2d,2p).

#### References

1. M. J. Frisch, G. W. Trucks, H. B. Schlegel, G. E. Scuseria, M. A. Robb, J. R. Cheeseman, G. Scalmani, V. Barone, G. A. Petersson, H. Nakatsuji, X. Li, M. Caricato, A. V. Marenich, J.

- Bloino, B. G. Janesko, R. Gomperts, B. Mennucci, H. P. Hratchian, J. V. Ortiz, A. F. Izmaylov, J. L. Sonnenberg, D. Williams-Young, F. Ding, F. Lipparini, F. Egidi, J. Goings, B. P. A. Petrone, T. Henderson, D. Ranasinghe, V. G. Zakrzewski, J. Gao, N. Rega, G. Zheng, W. Liang, M. Hada, M. Ehara, K. Toyota, R. Fukuda, J. Hasegawa, M. Ishida, T. Nakajima, Y. Honda, O. Kitao, H. Nakai, T. Vreven, K. Throssell, J. A. Montgomery, J. J. E. Peralta, F. Ogliaro, M. J. Bearpark, J. J. Heyd, E. N. Brothers, K. N. Kudin, V. N. Staroverov, T. A. Keith, R. Kobayashi, J. Normand, K. Raghavachari, A. P. Rendell, J. C. Burant, S. S. Iyengar, J. Tomasi, M. Cossi, J. M. Millam, M. Klene, C. Adamo, R. Cammi, J. W. Ochterski, R. L. Martin, K. Morokuma, O. Farkas, J. B. Foresman and D. J. Fox, Gaussian 16, Revision B.01, *Fox, Gaussian, Inc., Wallingford CT*, 2016.
2. Y. Zhao and D. G. Truhlar, The M06 suite of density functionals for main group thermochemistry, thermochemical kinetics, noncovalent interactions, excited states, and transition elements: two new functionals and systematic testing of four M06-class functionals and 12 other functionals, *Theor. Chem. Acc.*, 2008, **120**, 215-241.
  3. S. Grimme, J. Antony, S. Ehrlich and H. Krieg, A consistent and accurate ab initio parametrization of density functional dispersion correction (DFT-D) for the 94 elements H-Pu, *J. Chem. Phys.*, 2010, **132**, 154104.
  4. R. Ditchfield, W. J. Hehre and J. A. Pople, Self-Consistent Molecular-Orbital Methods. IX. An Extended Gaussian-Type Basis for Molecular-Orbital Studies of Organic Molecules, *J. Chem. Phys.*, 1971, **54**, 724-728.
  5. W. J. Hehre, R. Ditchfield and J. A. Pople, Self-Consistent Molecular Orbital Methods. XII. Further Extensions of Gaussian-Type Basis Sets for Use in Molecular Orbital Studies of Organic Molecules, *J. Chem. Phys.*, 1972, **56**, 2257-2261.
  6. P. C. Hariharan and J. A. Pople, The influence of polarization functions on molecular orbital hydrogenation energies, *Theor. Chim. Acta*, 1973, **28**, 213-222.
  7. J. D. Dill and J. A. Pople, Self-consistent molecular orbital methods. XV. Extended Gaussian-type basis sets for lithium, beryllium, and boron, *J. Chem. Phys.*, 1975, **62**, 2921-2923.
  8. G. Scalmani and M. J. Frisch, Continuous surface charge polarizable continuum models of solvation. I. General formalism, *J. Chem. Phys.*, 2010, **132**, 114110.
  9. R. Krishnan, J. S. Binkley, R. Seeger and J. A. Pople, Self-consistent molecular orbital methods. XX. A basis set for correlated wave functions, *J. Chem. Phys.*, 1980, **72**, 650-654.
  10. T. Clark, J. Chandrasekhar, G. W. Spitznagel and P. V. R. Schleyer, Efficient diffuse function-augmented basis sets for anion calculations. III. The 3-21+G basis set for first-row elements, Li-F, *J. Comput. Chem.*, 1983, **4**, 294-301.
  11. M. J. Frisch, J. A. Pople and J. S. Binkley, Self-consistent molecular orbital methods 25. Supplementary functions for Gaussian basis sets, *J. Chem. Phys.*, 1984, **80**, 3265-3269.
  12. R. F. W. Bader, Atoms in molecules, *Accounts of Chemical Research*, 1985, **18**, 9-15.
  13. T. Lu and F. Chen, Multiwfn: A multifunctional wavefunction analyzer, *J. Comput. Chem.*, 2012, **33**, 580-592.
  14. W. Humphrey, A. Dalke and K. Schulten, VMD: Visual molecular dynamics, *J. Mol. Graph.*, 1996, **14**, 33-38.
  15. R. G. Parr, L. v. Szentpály and S. Liu, Electrophilicity Index, *J. Am. Chem. Soc.*, 1999, **121**, 1922-1924.

16. W. Kohn and L. J. Sham, Self-Consistent Equations Including Exchange and Correlation Effects, *Phys. Rev.*, 1965, **140**, A1133-A1138.
17. T. Koopmans, Über die Zuordnung von Wellenfunktionen und Eigenwerten zu den Einzelnen Elektronen Eines Atoms, *Physica*, 1934, **1**, 104-113.
18. R. G. Parr and R. G. Pearson, Absolute hardness: companion parameter to absolute electronegativity, *J. Am. Chem. Soc.*, 1983, **105**, 7512-7516.
19. L. R. Domingo, E. Chamorro and P. Pérez, Understanding the Reactivity of Captodative Ethylenes in Polar Cycloaddition Reactions. A Theoretical Study, *J. Org. Chem.*, 2008, **73**, 4615-4624.
20. E. Chamorro, P. Pérez and L. R. Domingo, On the nature of Parr functions to predict the most reactive sites along organic polar reactions, *Chem. Phys. Lett.*, 2013, **582**, 141-143.
21. L. R. Domingo, P. Pérez and J. A. Sáez, Understanding the local reactivity in polar organic reactions through electrophilic and nucleophilic Parr functions, *RSC Adv.*, 2013, **3**, 1486-1494.
22. J. D. Chai and M. Head-Gordon, Long-range corrected hybrid density functionals with damped atom-atom dispersion corrections, *Phys. Chem. Chem. Phys.*, 2008, **10**, 6615-6620.
23. A. D. Becke, Density-functional thermochemistry. III. The role of exact exchange, *J. Chem. Phys.*, 1993, **98**, 5648-5652.
24. S. Grimme, S. Ehrlich and L. Goerigk, Effect of the Damping Function in Dispersion Corrected Density Functional Theory, *J. Comput. Chem.*, 2011, **32**, 1456-1465.

## Part 2. Discussion of NHC-catalyzed homo-coupling

In the main text, we discussed NHC-catalyzed cross-coupling between **R1** and **R2**. Here, we will examine two NHC-catalyzed homo-couplings. As illustrated in **Fig. 2b**, **M3** can bond with **R1** to form **P3** and **M3'** can bond with **R2** to form **P4**. Given that Michael addition is the chemoselective determining step in the reaction, we calculated the key step and generated the Gibbs free energy profiles for the two homo-couplings.

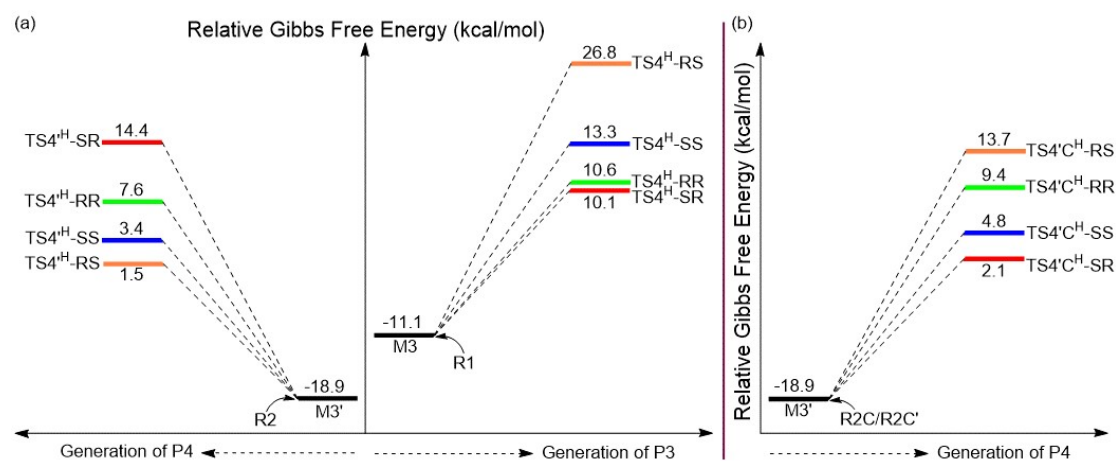

**Fig. S1** Gibbs free energy profile of key transition states in two NHC-catalyzed homo-couplings: high energy barriers make the two homo-couplings impossible to process under the room temperature

**Fig. S1a** presents the Gibbs free energies of two homo-couplings. The pathway to generate **P3** (**M3** bonding with **R1**) has energy barriers ranging from 21.2 to 37.9 kcal/mol, while the pathway to generate **P4** (**M3'** bonding with **R2**) has energy barriers ranging from 20.4 to 33.3 kcal/mol. Furthermore, because the main existing state of **R2** is the complex **R2C/R2C'**, we also discussed the other pathway to generate **P4** (**M3'** bonding with **R2C/R2C'**). As shown in **Fig. S1b**, the energy barriers ranging from 21.0 to 32.6 kcal/mol. However, the high energy barriers for both pathways prevent them from being processed at room temperature, making it impossible to generate homo-coupling products **P3** and **P4** in the reaction system.



### Part 3. Discussion of the chemoselectivity for proton transfer

Proton transfer is generally a complex process in a reaction, as it has multiple possible pathways. In the main text, we pointed out that there is no generation of the Breslow intermediate in the proton transfer process in **Pathway R1**. To explain this interesting phenomenon, we have some hypotheses below.

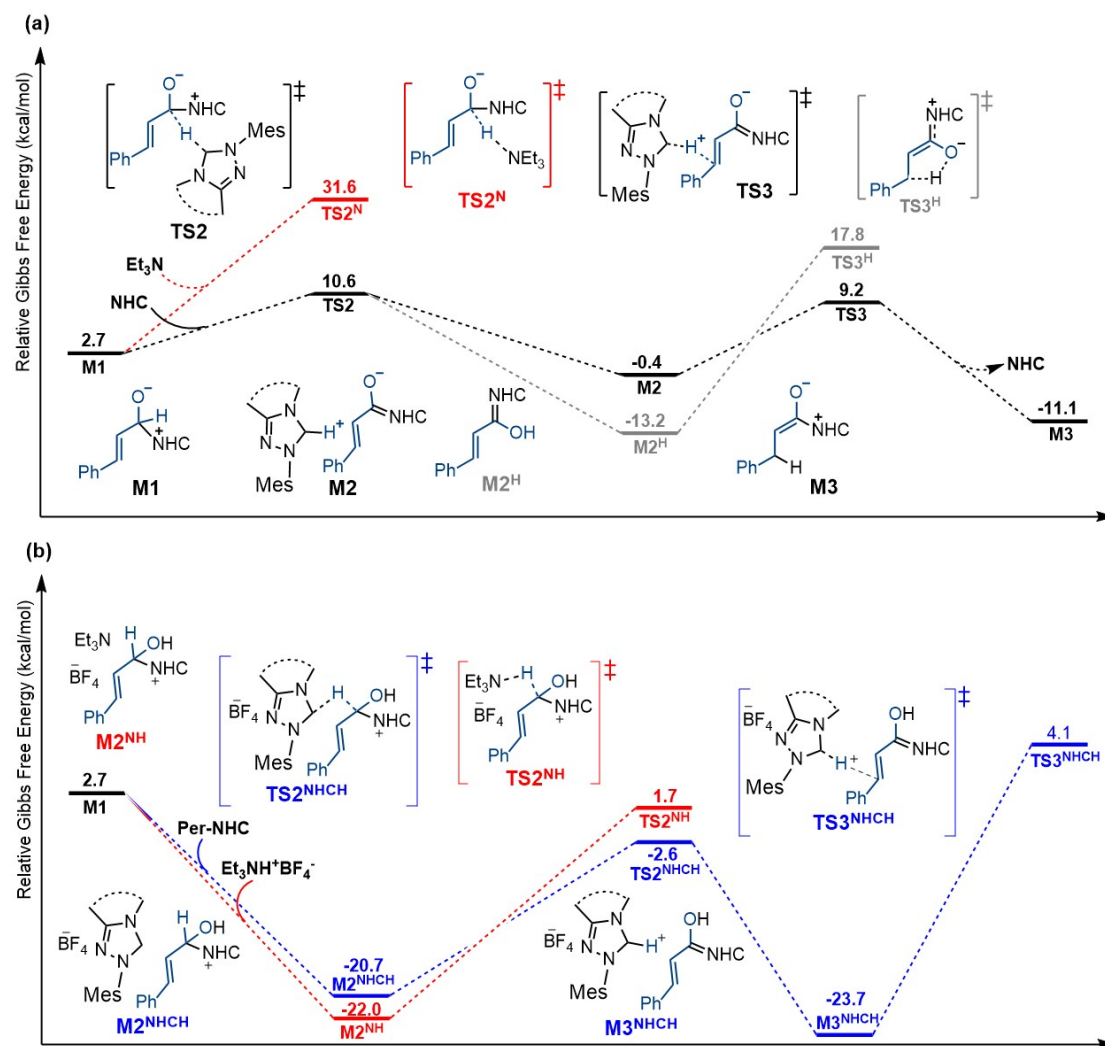

**Fig. S2** Possible proton transfer processes and Gibbs free energy profile in Pathway R1 (a) base-assist proton transfer and (b) acid-assist proton transfer: the optimal process of proton transfer is that NHC as base makes proton to shift directly

We have first designed **Et<sub>3</sub>N** or **NHC** as base to assist possible proton transfer pathways. As shown in **Fig. S2a**, quite high energy barrier (28.84 kcal/mol) from **Et<sub>3</sub>N** assisting proton transfer (via **TS2<sup>N</sup>**) makes that the process of proton transfer can be only assisted by **NHC** via **TS2** with lower energy barrier (7.84 kcal/mol). Then, **NHC** assisted proton transfer also has two possible pathways. One is that the

intermediate **M2<sup>H</sup>** directly generates **M3** via a five-member ring transition state and jump over an energy barrier 31.00 kcal/mol. The barrier is so high that **M2<sup>H</sup>** cannot generate **M3** under room temperature. The other one is that **NHC** keeps on assisting proton transfer and makes **M2** to generate **M3**. Its energy barrier is only 9.65 kcal/mol, so that **M2** can generate **M3** easily under room temperature. Comparing with the traditional pathway of generating enol intermediate **M2<sup>H</sup>**, the proton transfer process in this reaction favors to choose the kinetic controlled pathway. As shown in **Fig. S2b**, we also designed **Et<sub>3</sub>NH** and **Pre-NHC** as acid to assist proton transfer. Whether **Et<sub>3</sub>NH** or **Pre-NHC**, the energy barriers are quite high (23.7 and 27.8 kcal/mol). The high energy barriers make the process of proton transfer impossible to be happened smoothly. Therefore, the chemoselectivity of proton transfer is also controlled by reaction kinetic effectors. Lower energy barrier determines that proton transfer rather processes via the direct shift than the generation of Breslow intermediate.

#### Part 4. Active effect of Brønsted acid Pre-NHC on substrate R2

In the main text, we discussed the primary state of the substrate **R2**. We found that the complex **R2C/R2C'** is the main form of **R2**. Upon comparing the energy barriers in the stereo-determining step (Michael addition), we observed that the energy barriers for Michael donor **M3** bonding with **R2C/R2C'** were lower than those for **M3** bonding with **R2**. Therefore, we proposed a hypothesis that the **Pre-NHC-Et<sub>3</sub>N** complex activates the substrate **R2**.

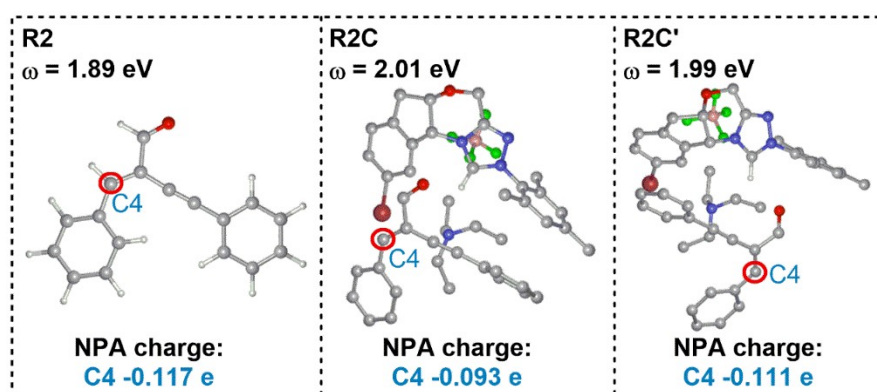

**Fig. S3** 3D structures of **R2**, **R2C**, and **R2C'** with their electrophilic reactive index and the NPA charge value of **C4** in different existing state of **R2**: the complex **Pre-NHC-Et<sub>3</sub>N** can enhance the electrophile of **R2** and decrease the electronic density of the active atom **C4**

Due to **R2** and **R2C/R2C'** playing the role of Michael acceptor, we calculated the electrophilic reactive index ( $\omega$ ) and performed natural population analysis (NPA) of the active atom **C4** in different existing states of **R2** since both **R2** and **R2C/R2C'** play the role of Michael acceptor. **Figure S3** shows that the electrophilic reactive indexes ( $\omega$ ) of the **R2C** and **R2C'** conformations are 2.01 eV and 1.99 eV, respectively, which are much higher than the electrophilic reactive index of **R2** (1.89 eV). Additionally, NPA charge values of the active atom **C4** in **R2**, **R2C**, and **R2C'** are -0.117 e, -0.096 e, and -0.111 e, respectively. Thus, the complex **Pre-NHC-Et<sub>3</sub>N** significantly increases the electrophilicity of the substrate **R2** and slightly decreases the negative electronic density of the active atom **C4**. Both high electrophilicity and low negative electronic density assist the **R2C/R2C'** complex as a Michael acceptor to bond with Michael donor **M3**. Moreover, the effect of the complex **Pre-NHC-Et<sub>3</sub>N** is stronger in **R2C** than in **R2C'**. As a result, **R2C** can bond with **M3**, leading to the

generation of the main product **P1** with *SR*-configuration. Hence, the effect of **Pre-NHC-Et<sub>3</sub>N** also assists in the generation of the main product **P1** with *SR*-configuration.

## Part 5. NHC cycle of the optimal pathway

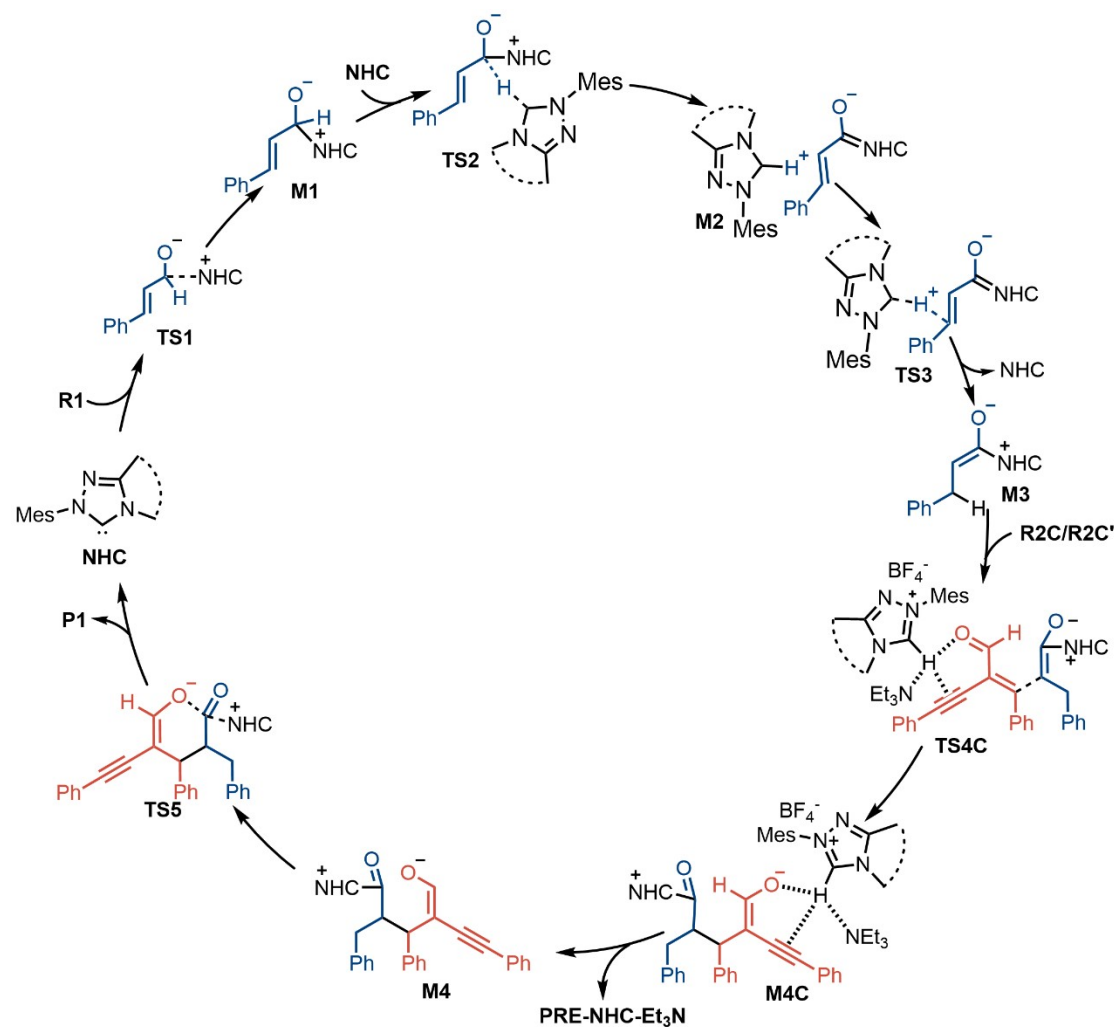

**Fig. S4** The optimal pathway of the reaction

The optimal pathway can be divided into four steps: (1) NHC nucleophilically attacks R1 to generate M1 via TS1; (2) NHC assists proton transfer to generate Michael donor M3 via TS2 and TS3, respectively; (3) M3 couples with Michael acceptor R2C/R2C' to generate M4 via four transition states, this step is the stereoselectivity determining step; (4) Self-cyclization and NHC dissociation together in M4 generate the product P1 (*SR*-configuration) via TS5.

## Part 6. Discussion of self-cyclization

In the main text, we used Frontier Molecular Orbital (FMO) theory to discuss why the Michael addition and self-cyclization are not a simple one-step [4+2] cyclization in the reaction. After the generation of **M4** through Michael addition, we found that self-cyclization and **NHC** dissociation occur collaboratively via **TS5**.

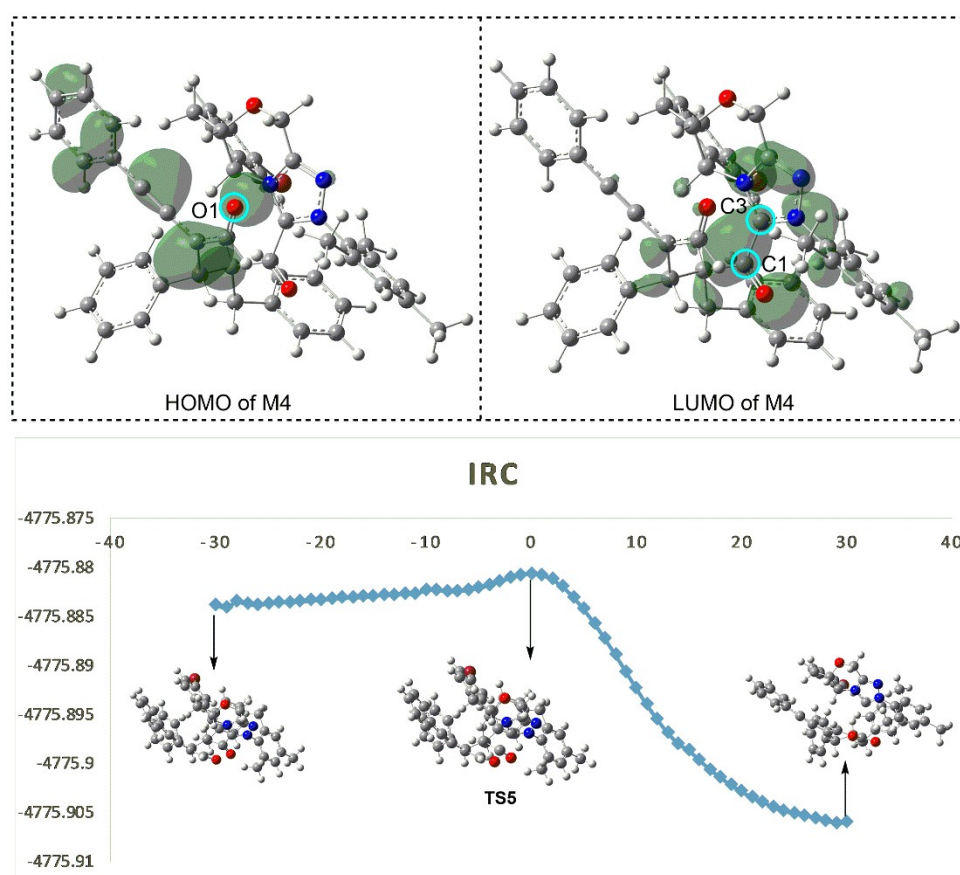

**Fig. S5** FMO distribution of the intermediate **M4** and IRC analysis of **TS5**: FMO symmetry matching of atoms **O1** (HOMO), **C1** (LUMO), and **C3** (LUMO) in **M4** is in favor of the process of self-cyclization; and IRC analysis of **TS5** proved that the synergistic process including self-cyclization and dissociation of **NHC** is reasonable

To explain this interesting discovery, we have analyzed the FMO of **M4**. As shown in **Fig. S5**, electrons in HOMO occupy in atom **O1** (green area). Atoms **C1** and **C3** share an empty molecular orbit in LUMO (green area). They are symmetry matching. Hence, the electrons can flux from the occupied orbit in **O1** to the empty orbit between **C1** and **C3**. **C1** and **C3** should be electrophilic in this collaborative process. Due to **C1** and **C3** existing in the same molecule **M4**, comparing the

difference between two electrophilic *Parr* functions ( $P_k^+$ ) of **C1** and **C3** is enough. By calculation, the electrophilic *Parr* functions ( $P_k^+$ ) of **C1** and **C3** are 0.003 and -0.002, respectively. The atom **C1** has stronger electrophilicity and more favors to bond with **O1**. Because of symmetry matching of FOM among atoms **O1** (HOMO), **C1** (LUMO), and **C3** (LUMO), the electrons fluxing direction should be from **O1** to **C1** firstly and then to **C3**, so that **O1** bonding with **C1** and breaking of the bond between **C1** and **C3** can happen in the same time. In addition, we employed intrinsic reaction coordinate (IRC) analysis to explore **TS5** more deeply. As shown in **Fig. S5**, the trend in back- and forward processes of **TS5** is consistent with our explain from FMO analysis, that **O1** bonds with **C1** to assist the breaking of the bond between **C1** and **C3**.

## Part 7. Discussion about the effect of substituents of R2

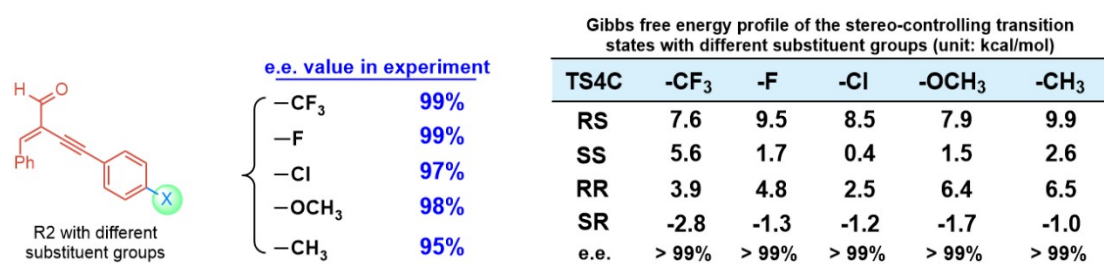

**Fig. S6** The effect of different substituents on stereoselectivity: experimental proofs accord to calculating predictions within the allowed error range

We investigated the effect of substituents on the stereoselectivity using five derivatives of **R2** with different electronic substituents (**Fig. S6**). Complexes of these derivatives with **Pre-NHC-Et<sub>3</sub>N** were used to couple with **M3**, and the energy barriers of the stereo-controlled transition states were calculated and compared. We found that all substrates with different substituents can provide a quite good stereoselectivity (all *e.e.* > 99%). Synthesizing the derivatives with different electronic effect substituents yielded the *e.e.* values (all *e.e.* > 95%) consistent with our calculating results within the allowed error range. We also compared the energy differences between transition states with *SR*- and *RS*-configurations. It observed that the effect of stereoselectivity with electron-withdrawing groups (-CF<sub>3</sub>, -F, -Cl) was stronger than with electron-donating groups (-OCH<sub>3</sub> and -CH<sub>3</sub>). Analysis of the *e.e.* values of synthesizing derivatives confirmed that the stereoselectivity with electron-withdrawing group (-CF<sub>3</sub>, -F, -Cl) was indeed better, with *e.e.* value of 99%, 99%, and 97%, respectively. Our prediction that electron-withdrawing group enhance stereoselectivity was accurate, and should be helpful in following experiments that aimed to find new reaction model.



## Part 8. Thermodynamics parameters of stationary points

**Table S3** The single point energies (E) under M06-2X-D3/6-311++G(3d2f, 3p2d)/IEF-PCM, Gibbs free energy corrections (GFEC) under M06-2X-D3/6-31G(d, p)/IEF-PCM, and Gibbs free energy (GFE = E + GFEC) energies of the stationary points (SP) involved in the reaction (unit: a.u.)

| SP                                                                | E            | GFEC     | GFE          | Imaginary Frequency |
|-------------------------------------------------------------------|--------------|----------|--------------|---------------------|
| R1                                                                | -422.81924   | 0.109827 | -422.709413  |                     |
| R2                                                                | -729.925012  | 0.191964 | -729.733048  |                     |
| NHC                                                               | -3625.460306 | 0.319295 | -3625.141011 |                     |
| Et <sub>3</sub> N                                                 | -292.292044  | 0.174385 | -292.117659  |                     |
| NHCH-BF <sub>4</sub>                                              | -4050.505488 | 0.34298  | -4050.162508 |                     |
| PRE-NHC-Et <sub>3</sub> N                                         | -4342.827499 | 0.540076 | -4342.287423 |                     |
| TS0                                                               | -4342.822162 | 0.540117 | -4342.282045 | -1008.03            |
| NHC-Et <sub>3</sub> NH <sup>+</sup> ·BF <sub>4</sub> <sup>-</sup> | -4342.825765 | 0.543352 | -4342.282413 |                     |
| R2C                                                               | -5072.78013  | 0.76443  | -5072.0157   |                     |
| R2C'                                                              | -5072.779553 | 0.761616 | -5072.017937 |                     |
| TS1                                                               | -4048.289463 | 0.454748 | -4047.834715 | -203.46             |
| M1                                                                | -4048.302177 | 0.4561   | -4047.846077 |                     |
| TS2                                                               | -7673.775958 | 0.801362 | -7672.974596 | -1293.09            |
| TS2 <sup>N</sup>                                                  | -4340.572617 | 0.654805 | -4339.917812 | -1280.97            |
| TS2 <sup>NH</sup>                                                 | -4765.658874 | 0.679657 | -4764.979217 | -1179.00            |
| TS2 <sup>NHCH</sup>                                               | -8098.846172 | 0.829024 | -8098.017148 | -1310.27            |
| M2                                                                | -7673.798081 | 0.805987 | -7672.992094 |                     |
| M2 <sup>NH</sup>                                                  | -4765.694018 | 0.677022 | -4765.016996 |                     |
| M2 <sup>NHCH</sup>                                                | -8098.878714 | 0.832894 | -8098.04582  |                     |
| M2 <sup>H</sup>                                                   | -4048.327479 | 0.456088 | -4047.871391 |                     |
| TS3                                                               | -7673.778121 | 0.801396 | -7672.976725 | -1395.71            |
| TS3 <sup>H</sup>                                                  | -4048.271411 | 0.449386 | -4047.822025 | -1698.40            |
| TS3 <sup>NHCH</sup>                                               | -8098.839431 | 0.832961 | -8098.00247  | -1340.17            |

|                    |              |          |              |          |
|--------------------|--------------|----------|--------------|----------|
| M3                 | -4048.326447 | 0.458285 | -4047.868162 |          |
| M3 <sup>NHCH</sup> | -8098.88159  | 0.830914 | -8098.050676 |          |
| TS4C-RS            | -9121.102286 | 1.254084 | -9119.848202 | -354.33  |
| TS4C-SS            | -9121.110289 | 1.258011 | -9119.852278 | -264.96  |
| TS4C-RR            | -9121.110301 | 1.262632 | -9119.847669 | -332.53  |
| TS4C-SR            | -9121.116854 | 1.253273 | -9119.863581 | -240.93  |
| TS4-RS             | -4778.229329 | 0.67768  | -4777.551649 | -363.17  |
| TS4-RR             | -4778.250725 | 0.679707 | -4777.571018 | -259.99  |
| TS4-SS             | -4778.246157 | 0.680704 | -4777.565453 | -309.55  |
| TS4-SR             | -4778.256169 | 0.67982  | -4777.576349 | -306.85  |
| M4C                | -9121.141591 | 1.257354 | -9119.884237 |          |
| M4                 | -4778.272954 | 0.681645 | -4777.591309 |          |
| TS5                | -4778.267912 | 0.683762 | -4777.58415  | -184.59  |
| P                  | -1152.797123 | 0.33378  | -1152.463343 |          |
| R2C-NHC            | -8698.281159 | 1.110703 | -8697.170456 |          |
| R2C'-NHC           | -8698.271754 | 1.112379 | -8697.159375 |          |
| TS1'               | -4355.403737 | 0.541899 | -4354.861838 | -160.64  |
| TS1'C              | -8698.276074 | 1.110947 | -8697.165127 | -108.37  |
| TS1'C'             | -8698.266174 | 1.113322 | -8697.152852 | -129.62  |
| M1'C               | -8698.299922 | 1.116653 | -8697.183269 |          |
| M1'C'              | -8698.292664 | 1.112452 | -8697.180212 |          |
| M1'                | -4355.419021 | 0.543972 | -4354.875049 |          |
| TS2'               | -7980.888138 | 0.884897 | -7980.003241 | -1523.91 |
| TS2' <sup>N</sup>  | -4647.699808 | 0.737395 | -4646.962413 | -1270.34 |
| M2'                | -7980.911771 | 0.888354 | -7980.023417 |          |
| M2' <sup>H</sup>   | -4355.429722 | 0.541128 | -4354.888594 |          |
| TS3'               | -7980.899335 | 0.884727 | -7980.014608 | -1431.04 |
| TS3' <sup>H</sup>  | -4355.384442 | 0.538874 | -4354.845568 | -827.51  |
| M3'                | -4355.44664  | 0.542482 | -4354.904158 |          |

|                      |              |          |              |         |
|----------------------|--------------|----------|--------------|---------|
| TS4'-RS              | -4778.255899 | 0.684272 | -4777.571627 | -364.25 |
| TS4'-RR              | -4778.230962 | 0.681463 | -4777.549499 | -465.80 |
| TS4'-SS              | -4778.246044 | 0.683016 | -4777.563028 | -338.97 |
| TS4'-SR              | -4778.231183 | 0.680593 | -4777.55059  | -387.55 |
| TS4 <sup>H</sup> -RS | -4471.113563 | 0.596454 | -4470.517109 | -381.76 |
| TS4 <sup>H</sup> -RR | -4471.137771 | 0.594746 | -4470.543025 | -310.08 |
| TS4 <sup>H</sup> -SS | -4471.134517 | 0.59584  | -4470.538677 | -330.03 |
| TS4 <sup>H</sup> -SR | -4471.141562 | 0.597739 | -4470.543823 | -308.01 |
| TS4 <sup>H</sup> -RS | -5085.369184 | 0.764525 | -5084.604659 | -336.38 |
| TS4 <sup>H</sup> -RR | -5085.359286 | 0.764292 | -5084.594994 | -443.49 |
| TS4 <sup>H</sup> -SS | -5085.364935 | 0.763308 | -5084.601627 | -387.55 |
| TS4 <sup>H</sup> -SR | -5085.347485 | 0.763227 | -5084.584258 | -363.40 |
| R2CF                 | -1066.893029 | 0.189966 | -1066.703063 |         |
| TS4CCF-RS            | -9458.073475 | 1.251942 | -9456.821533 | -335.45 |
| TS4CCF-SS            | -9458.082854 | 1.258078 | -9456.824776 | -252.50 |
| TS4CCF-RR            | -9458.082623 | 1.255193 | -9456.82743  | -318.35 |
| TS4CCF-SR            | -9458.088158 | 1.25004  | -9456.838118 | -226.64 |
| R2Cl                 | -1189.504355 | 0.179344 | -1189.325011 |         |
| TS4CCI-RS            | -9580.683789 | 1.241697 | -9579.442092 | -337.64 |
| TS4CCI-SS            | -9580.693326 | 1.23836  | -9579.454966 | -249.57 |
| TS4CCI-RR            | -9580.692266 | 1.240629 | -9579.451637 | -322.66 |
| TS4CCI-SR            | -9580.698494 | 1.24096  | -9579.457534 | -231.25 |
| R2F                  | -829.143028  | 0.181985 | -828.961043  |         |
| TS4CF-RS             | -9220.321789 | 1.245259 | -9219.07653  | -339.79 |
| TS4CF-SS             | -9220.330271 | 1.241306 | -9219.088965 | -266.58 |
| TS4CF-RR             | -9220.33034  | 1.246355 | -9219.083985 | -326.44 |
| TS4CF-SR             | -9220.336305 | 1.242568 | -9219.093737 | -239.35 |
| R2Me                 | -769.228828  | 0.217889 | -769.014239  |         |
| TS4CMe-RS            | -9160.404405 | 1.278649 | -9159.125756 | -342.74 |

|            |              |          |              |         |
|------------|--------------|----------|--------------|---------|
| TS4CMe-SS  | -9160.414097 | 1.276648 | -9159.137449 | -258.82 |
| TS4CMe-RR  | -9160.412867 | 1.281612 | -9159.131255 | -333.42 |
| TS4CMe-SR  | -9160.42019  | 1.277135 | -9159.143055 | -245.22 |
| R2CNH      | -785.272667  | 0.206593 | -785.066074  |         |
| TS4CNH-RS  | -9176.449881 | 1.273836 | -9175.176045 | -354.36 |
| TS4CNH-SS  | -9176.458992 | 1.27099  | -9175.188002 | -302.62 |
| TS4CNH-RR  | -9176.457988 | 1.272149 | -9175.185839 | -339.20 |
| TS4CNH-SR  | -9176.465321 | 1.268461 | -9175.19686  | -258.84 |
| R2NO       | -934.330007  | 0.190253 | -934.139754  |         |
| TS4CNO-RS  | -9325.510776 | 1.253763 | -9324.257013 | -333.11 |
| TS4CNO-SS  | -9325.521949 | 1.250357 | -9324.271592 | -262.12 |
| TS4CNO-RR  | -9325.520668 | 1.255604 | -9324.265064 | -309.48 |
| TS4CNO-SR  | -9325.525534 | 1.251651 | -9324.273883 | -222.49 |
| R2OMe      | -844.40589   | 0.221621 | -844.184269  |         |
| TS4COMe-RS | -9235.585289 | 1.283065 | -9234.302224 | -343.34 |
| TS4COMe-SS | -9235.5928   | 1.280336 | -9234.312464 | -313.86 |
| TS4COMe-RR | -9235.593039 | 1.288441 | -9234.304598 | -329.00 |
| TS4COMe-SR | -9235.599372 | 1.281806 | -9234.317566 | -250.10 |

---

## Part 9. Cartesian coordinates of stationary points

R1

|   |             |             |             |
|---|-------------|-------------|-------------|
| C | -0.93657900 | -0.58545300 | -0.00000400 |
| C | -1.98451700 | 0.25444000  | -0.00000200 |
| H | -1.15135900 | -1.65527000 | -0.00000800 |
| H | -1.88818500 | 1.33627000  | 0.00000200  |
| C | -3.34478600 | -0.29083300 | -0.00000500 |
| H | -3.40470700 | -1.39904100 | -0.00000900 |
| O | -4.35301100 | 0.38681000  | 0.00000900  |
| C | 0.48680000  | -0.23880900 | -0.00000200 |
| C | 1.43024800  | -1.27477900 | 0.00000100  |
| C | 0.94118500  | 1.08885500  | -0.00000300 |
| C | 2.79315400  | -0.99661400 | 0.00000300  |
| H | 1.08610200  | -2.30537200 | 0.00000200  |
| C | 2.30130100  | 1.36617400  | -0.00000100 |
| H | 0.22907300  | 1.90769200  | -0.00000600 |
| C | 3.23121600  | 0.32501600  | 0.00000300  |
| H | 3.51117500  | -1.80982100 | 0.00000600  |
| H | 2.64042200  | 2.39669900  | -0.00000200 |
| H | 4.29342900  | 0.54636700  | 0.00000400  |

R2

|   |             |             |             |
|---|-------------|-------------|-------------|
| C | -2.26604300 | 1.41108000  | 0.00732300  |
| C | -1.00086900 | 1.90026400  | 0.00719100  |
| H | -3.05249100 | 2.16493600  | -0.03011800 |
| C | -0.86158500 | 3.38000400  | -0.01844000 |
| H | -1.82581500 | 3.92535000  | -0.03447900 |
| O | 0.19534500  | 3.96829200  | -0.02103100 |
| C | -2.75562900 | 0.03714900  | 0.03329800  |
| C | -4.12925600 | -0.16369100 | -0.18471600 |
| C | -1.94139500 | -1.08289100 | 0.27344800  |
| C | -4.67325400 | -1.44151900 | -0.18463800 |
| H | -4.76852100 | 0.69692900  | -0.36088900 |
| C | -2.49037900 | -2.35894000 | 0.28032000  |
| H | -0.88462900 | -0.95009500 | 0.46714200  |
| C | -3.85291300 | -2.54409500 | 0.04701900  |
| H | -5.73493200 | -1.57763800 | -0.36071400 |
| H | -1.85185400 | -3.21509200 | 0.47180500  |
| H | -4.27409400 | -3.54409200 | 0.05160100  |
| C | 0.21137000  | 1.15201000  | 0.00652500  |
| C | 1.28160800  | 0.58180700  | -0.00763800 |
| C | 2.52784200  | -0.12219700 | -0.02368600 |
| C | 2.54858800  | -1.51555500 | -0.18899200 |
| C | 3.73533500  | 0.57623800  | 0.12616000  |

|   |            |             |             |
|---|------------|-------------|-------------|
| C | 3.76014200 | -2.19568900 | -0.20193000 |
| H | 1.61266600 | -2.05150300 | -0.30983600 |
| C | 4.94203900 | -0.11270800 | 0.11155800  |
| H | 3.71251500 | 1.65327500  | 0.25263700  |
| C | 4.95751100 | -1.49727200 | -0.05169200 |
| H | 3.77081600 | -3.27287400 | -0.33040000 |
| H | 5.87309300 | 0.43190000  | 0.22767200  |
| H | 5.90181300 | -2.03139800 | -0.06284500 |

NHC

|    |             |             |             |
|----|-------------|-------------|-------------|
| C  | -3.59970900 | -1.35176900 | -0.20486400 |
| C  | -2.37712800 | -0.77681100 | -0.54945400 |
| C  | -2.17209900 | 0.59352100  | -0.50869000 |
| C  | -3.24301000 | 1.38377100  | -0.10329600 |
| C  | -4.47716500 | 0.83924900  | 0.24200300  |
| C  | -4.65887100 | -0.54346600 | 0.18918100  |
| C  | -3.52276300 | -2.85648900 | -0.32901400 |
| C  | -2.01326300 | -3.12721700 | -0.31132000 |
| C  | -1.39503400 | -1.85650600 | -0.94982400 |
| H  | -1.21128600 | 1.02304600  | -0.77215100 |
| H  | -5.28439300 | 1.48993300  | 0.55806600  |
| H  | -5.61561500 | -0.97285900 | 0.46931600  |
| H  | -4.01776000 | -3.39282200 | 0.48357300  |
| H  | -1.72082200 | -4.04136600 | -0.84383800 |
| H  | -1.36060000 | -1.96128800 | -2.03924600 |
| H  | -3.95691400 | -3.19467200 | -1.27616900 |
| Br | -3.00298800 | 3.26519100  | -0.00834700 |
| O  | -1.63301900 | -3.22037300 | 1.05389400  |
| C  | -0.24653800 | -3.43982800 | 1.21924500  |
| H  | -0.03956600 | -3.47819100 | 2.28909100  |
| H  | 0.05135700  | -4.39690600 | 0.76708900  |
| N  | -0.04125300 | -1.62958300 | -0.47202200 |
| C  | 0.81052800  | -0.65041000 | -0.91787600 |
| C  | 0.50786500  | -2.31680000 | 0.57940700  |
| N  | 1.68698600  | -1.85667800 | 0.85856700  |
| N  | 1.84327400  | -0.84501500 | -0.07138300 |
| C  | 3.04370200  | -0.06785000 | -0.03928100 |
| C  | 2.96882900  | 1.27805000  | 0.33338400  |
| C  | 4.25429800  | -0.68683100 | -0.36818800 |
| C  | 4.15713600  | 2.00895100  | 0.36499100  |
| C  | 5.41492800  | 0.08326600  | -0.31732600 |
| C  | 5.38544700  | 1.43145100  | 0.04349500  |
| H  | 4.12037100  | 3.05583800  | 0.65688800  |
| H  | 6.36501000  | -0.38142000 | -0.57043900 |

|                      |             |             |             |
|----------------------|-------------|-------------|-------------|
| C                    | 6.65009600  | 2.25141600  | 0.05865800  |
| H                    | 7.51463700  | 1.63985100  | 0.32701400  |
| H                    | 6.84429700  | 2.68143900  | -0.92933900 |
| H                    | 6.57658100  | 3.07755000  | 0.76946800  |
| C                    | 4.29675900  | -2.13727400 | -0.77024500 |
| H                    | 4.10813900  | -2.78756300 | 0.08825500  |
| H                    | 3.52564300  | -2.35665600 | -1.51490900 |
| H                    | 5.27140100  | -2.38967500 | -1.19140400 |
| C                    | 1.65504500  | 1.92641300  | 0.68445900  |
| H                    | 1.06631000  | 2.12280800  | -0.21642800 |
| H                    | 1.05097500  | 1.28028800  | 1.32781900  |
| H                    | 1.82357900  | 2.87386000  | 1.19952400  |
| Et <sub>3</sub> N    |             |             |             |
| N                    | -0.08833500 | -0.01272400 | -0.39270600 |
| C                    | 0.45709800  | -1.04744400 | 0.49350000  |
| C                    | 1.68280500  | -1.73156700 | -0.10622000 |
| H                    | -0.31204700 | -1.80659100 | 0.67858200  |
| H                    | 0.70381500  | -0.62397400 | 1.47941000  |
| H                    | 2.06563600  | -2.50737900 | 0.56387800  |
| H                    | 1.42002500  | -2.19682500 | -1.06018300 |
| H                    | 2.48339900  | -1.01216900 | -0.29480900 |
| C                    | 0.19486700  | 1.34404400  | 0.06078900  |
| C                    | 1.68318800  | 1.66970000  | 0.03625600  |
| H                    | -0.19410300 | 1.52981300  | 1.07903800  |
| H                    | -0.33533700 | 2.03160600  | -0.60917800 |
| H                    | 1.84659900  | 2.71816800  | 0.29910100  |
| H                    | 2.23772500  | 1.05814100  | 0.75409300  |
| H                    | 2.09651700  | 1.48784100  | -0.95952800 |
| C                    | -1.49970900 | -0.21226600 | -0.71459600 |
| C                    | -2.48607500 | -0.01316300 | 0.44076300  |
| H                    | -1.60508600 | -1.22683500 | -1.11528000 |
| H                    | -1.75634800 | 0.47358400  | -1.53102500 |
| H                    | -3.50333300 | -0.25268300 | 0.11924000  |
| H                    | -2.23991400 | -0.66092200 | 1.28816800  |
| H                    | -2.48224700 | 1.02146900  | 0.79449300  |
| NHCH-BF <sub>4</sub> |             |             |             |
| C                    | 3.28138200  | 1.86075200  | -0.85548700 |
| C                    | 2.17384100  | 1.02003700  | -0.98196900 |
| C                    | 2.28573900  | -0.35808100 | -0.92348900 |
| C                    | 3.56050000  | -0.87989500 | -0.72664400 |
| C                    | 4.68526500  | -0.06940100 | -0.61517000 |
| C                    | 4.54588200  | 1.31764200  | -0.67969800 |

|    |             |             |             |
|----|-------------|-------------|-------------|
| C  | 2.85781300  | 3.31119300  | -0.91740100 |
| C  | 1.36081700  | 3.23300900  | -0.60174000 |
| C  | 0.94793900  | 1.87311500  | -1.21709900 |
| H  | 1.42134700  | -1.01065900 | -0.94672000 |
| H  | 5.65876300  | -0.51894900 | -0.45743600 |
| H  | 5.41705100  | 1.95553000  | -0.57053300 |
| H  | 3.36772100  | 3.94829600  | -0.19209800 |
| H  | 0.76577500  | 4.06584400  | -0.99751900 |
| H  | 0.74237900  | 1.98801200  | -2.28643200 |
| H  | 3.01346600  | 3.73220900  | -1.91658600 |
| Br | 3.75726500  | -2.75563200 | -0.57485200 |
| O  | 1.25895300  | 3.16207200  | 0.80793900  |
| C  | -0.04760700 | 3.00943200  | 1.30598200  |
| H  | 0.03244000  | 2.77104100  | 2.36510600  |
| H  | -0.63286600 | 3.93062200  | 1.17405300  |
| N  | -0.29110200 | 1.41494400  | -0.58761100 |
| C  | -1.20166800 | 0.54655300  | -1.03467800 |
| C  | -0.76188900 | 1.89702700  | 0.60102200  |
| N  | -1.92003700 | 1.37196500  | 0.88822900  |
| N  | -2.18159300 | 0.53051800  | -0.14804100 |
| C  | -3.46840500 | -0.11190400 | -0.26503400 |
| C  | -3.55681000 | -1.50593900 | -0.27672600 |
| C  | -4.58471100 | 0.72981200  | -0.37755700 |
| C  | -4.83540800 | -2.05644600 | -0.39131200 |
| C  | -5.83204800 | 0.12337600  | -0.48594400 |
| C  | -5.97804400 | -1.26609700 | -0.48747300 |
| H  | -4.93273500 | -3.13881500 | -0.39836200 |
| H  | -6.71296200 | 0.75333800  | -0.57784800 |
| C  | -7.34626500 | -1.88952700 | -0.57166900 |
| H  | -7.82659300 | -1.88989200 | 0.41182200  |
| H  | -7.99225200 | -1.33009400 | -1.25240000 |
| H  | -7.28948200 | -2.92388000 | -0.91596100 |
| C  | -4.45738700 | 2.23098800  | -0.39865700 |
| H  | -4.24306500 | 2.62215400  | 0.59888500  |
| H  | -3.64558100 | 2.55502200  | -1.05724100 |
| H  | -5.38570700 | 2.67948900  | -0.75473900 |
| C  | -2.35026400 | -2.40093800 | -0.18651100 |
| H  | -1.87429300 | -2.51522500 | -1.16715400 |
| H  | -1.60067800 | -2.00812200 | 0.50003700  |
| H  | -2.65296700 | -3.39619200 | 0.14260400  |
| H  | -1.16578800 | -0.00914400 | -1.95977400 |
| B  | 0.91706500  | -0.68804900 | 2.05112800  |
| F  | 0.25112200  | -1.11142400 | 3.19704500  |
| F  | 1.17999000  | 0.68788400  | 2.12503200  |



|   |            |             |            |
|---|------------|-------------|------------|
| F | 0.07544100 | -0.90690700 | 0.92444800 |
| F | 2.09921500 | -1.40066900 | 1.87730200 |

PRE-NHC-Et<sub>3</sub>N

|    |             |             |             |
|----|-------------|-------------|-------------|
| C  | 3.66203300  | -1.21480900 | 1.35022300  |
| C  | 2.41947500  | -0.65360100 | 1.06142300  |
| C  | 2.28353300  | 0.48024000  | 0.28166200  |
| C  | 3.44774100  | 1.04567500  | -0.22281000 |
| C  | 4.70498500  | 0.51677600  | 0.05159900  |
| C  | 4.81495500  | -0.62443600 | 0.84864900  |
| C  | 3.49729500  | -2.44260600 | 2.21792400  |
| C  | 2.01958700  | -2.80846800 | 2.02572800  |
| C  | 1.34183000  | -1.43912700 | 1.76233600  |
| H  | 1.31230100  | 0.88172700  | 0.01746700  |
| H  | 5.58923100  | 0.98329500  | -0.36708100 |
| H  | 5.79330900  | -1.04734400 | 1.05319200  |
| H  | 4.13466700  | -3.27906600 | 1.92368300  |
| H  | 1.57198600  | -3.33092300 | 2.88106700  |
| H  | 1.06472500  | -0.96841800 | 2.71267700  |
| H  | 3.69649300  | -2.21305400 | 3.27024600  |
| Br | 3.28281000  | 2.55725800  | -1.34803500 |
| O  | 1.95068000  | -3.60785000 | 0.86134300  |
| C  | 0.64928300  | -4.00468500 | 0.50085900  |
| H  | 0.71098600  | -4.46672400 | -0.48402500 |
| H  | 0.24001400  | -4.72708500 | 1.22074800  |
| N  | 0.10651100  | -1.63389500 | 1.00436700  |
| C  | -0.89171900 | -0.77099600 | 0.78926300  |
| C  | -0.25972700 | -2.81673100 | 0.42554900  |
| N  | -1.45636800 | -2.73585700 | -0.08588400 |
| N  | -1.83247500 | -1.44844600 | 0.15627600  |
| C  | -3.15047400 | -0.95530500 | -0.13766100 |
| C  | -3.52842500 | -0.76010800 | -1.46892500 |
| C  | -3.98942700 | -0.68494100 | 0.95057900  |
| C  | -4.79249600 | -0.21106700 | -1.68761400 |
| C  | -5.24114500 | -0.14125100 | 0.67191400  |
| C  | -5.64993400 | 0.11934400  | -0.63740400 |
| H  | -5.11175200 | -0.03655400 | -2.71172600 |
| H  | -5.91324800 | 0.08027000  | 1.49697400  |
| C  | -6.98503300 | 0.76155100  | -0.90723900 |
| H  | -7.35718900 | 0.50014100  | -1.89981500 |
| H  | -7.72678700 | 0.45861700  | -0.16491500 |
| H  | -6.89724700 | 1.85206900  | -0.86151600 |
| C  | -3.57745300 | -0.99203000 | 2.36902600  |
| H  | -3.13511800 | -1.98965300 | 2.44464500  |

|     |             |             |             |
|-----|-------------|-------------|-------------|
| H   | -2.84140100 | -0.27630000 | 2.75018300  |
| H   | -4.44553000 | -0.95153900 | 3.02816500  |
| C   | -2.62613400 | -1.13492700 | -2.61105500 |
| H   | -1.62042600 | -0.73430800 | -2.48008800 |
| H   | -2.52603100 | -2.22267000 | -2.67826300 |
| H   | -3.04126400 | -0.77147700 | -3.55241000 |
| H   | -0.91950600 | 0.31019800  | 1.00943200  |
| B   | 1.13201300  | -1.13426900 | -2.31967600 |
| F   | 0.21295600  | -0.35979900 | -1.55235800 |
| F   | 0.48156600  | -1.56966600 | -3.47226300 |
| F   | 1.52153400  | -2.23236900 | -1.53994700 |
| F   | 2.22693200  | -0.33916700 | -2.63806800 |
| N   | -0.84487000 | 2.27971100  | 1.34543200  |
| C   | -0.06710700 | 2.07945000  | 2.57839600  |
| C   | 0.17790800  | 3.31692800  | 3.44352300  |
| H   | 0.90052400  | 1.65091400  | 2.28700300  |
| H   | -0.58875900 | 1.31803800  | 3.17606700  |
| H   | 0.81508000  | 3.05306000  | 4.29119900  |
| H   | 0.68531600  | 4.10055400  | 2.87409600  |
| H   | -0.75311000 | 3.72748500  | 3.84090800  |
| C   | -0.16112200 | 3.19210000  | 0.40774200  |
| C   | -0.35463800 | 2.84433000  | -1.06680700 |
| H   | 0.91432400  | 3.13965500  | 0.61978000  |
| H   | -0.46295900 | 4.23499800  | 0.59843900  |
| H   | 0.30028900  | 3.47731300  | -1.67201300 |
| H   | -0.09058800 | 1.80239400  | -1.26524300 |
| H   | -1.37917100 | 3.00048500  | -1.40449900 |
| C   | -2.21923800 | 2.69128200  | 1.66330900  |
| C   | -3.15986400 | 2.74594700  | 0.46554500  |
| H   | -2.23012500 | 3.67339400  | 2.16401000  |
| H   | -2.60751100 | 1.96552800  | 2.38920700  |
| H   | -4.19099500 | 2.82722000  | 0.82030600  |
| H   | -2.95806900 | 3.61406100  | -0.16570500 |
| H   | -3.08093700 | 1.84103000  | -0.14533700 |
| TS0 |             |             |             |
| C   | 3.66086000  | -1.08916000 | 1.45471800  |
| C   | 2.41141100  | -0.55439200 | 1.14722600  |
| C   | 2.26583800  | 0.56096200  | 0.34735800  |
| C   | 3.42094200  | 1.15356800  | -0.14249700 |
| C   | 4.68532200  | 0.66076700  | 0.15977800  |
| C   | 4.80722000  | -0.47440300 | 0.96680700  |
| C   | 3.49551200  | -2.33699800 | 2.29476600  |
| C   | 2.03159300  | -2.72759900 | 2.04168700  |

|    |             |             |             |
|----|-------------|-------------|-------------|
| C  | 1.32997900  | -1.36582400 | 1.81176500  |
| H  | 1.29072900  | 0.91583400  | 0.04456000  |
| H  | 5.56603200  | 1.14224100  | -0.24934200 |
| H  | 5.79191800  | -0.87656100 | 1.18288400  |
| H  | 4.16188100  | -3.15243100 | 2.00575800  |
| H  | 1.57285700  | -3.29740700 | 2.86052100  |
| H  | 1.04589900  | -0.92772000 | 2.77587400  |
| H  | 3.65239000  | -2.12539800 | 3.35819800  |
| Br | 3.21278900  | 2.63947000  | -1.29678900 |
| O  | 2.01509600  | -3.47708000 | 0.84268000  |
| C  | 0.72568600  | -3.87216500 | 0.43157300  |
| H  | 0.82087500  | -4.30431600 | -0.56328100 |
| H  | 0.30661400  | -4.61787600 | 1.12238600  |
| N  | 0.11293700  | -1.53287100 | 1.02953500  |
| C  | -0.88773100 | -0.63937200 | 0.83910700  |
| C  | -0.19199600 | -2.68964600 | 0.36759600  |
| N  | -1.36035300 | -2.60251700 | -0.19709400 |
| N  | -1.76426500 | -1.33133600 | 0.10832400  |
| C  | -3.09199400 | -0.89057200 | -0.21034800 |
| C  | -3.41548500 | -0.54924600 | -1.52604500 |
| C  | -4.01857300 | -0.83734200 | 0.84016900  |
| C  | -4.70466900 | -0.06172900 | -1.75678200 |
| C  | -5.28950800 | -0.34427000 | 0.55552100  |
| C  | -5.64229200 | 0.06663400  | -0.73266900 |
| H  | -4.97814800 | 0.22460100  | -2.76923500 |
| H  | -6.02430600 | -0.28767900 | 1.35489900  |
| C  | -7.00498600 | 0.64967900  | -1.00107800 |
| H  | -7.27871400 | 0.54987900  | -2.05328800 |
| H  | -7.77040400 | 0.16062000  | -0.39405800 |
| H  | -7.01924500 | 1.71614300  | -0.75269000 |
| C  | -3.67092000 | -1.34479000 | 2.21760500  |
| H  | -2.89878400 | -0.73982500 | 2.70233600  |
| H  | -4.55486200 | -1.34323900 | 2.85685300  |
| H  | -3.28496900 | -2.36755900 | 2.16298800  |
| C  | -2.43860900 | -0.73135800 | -2.65424500 |
| H  | -1.42514000 | -0.44183700 | -2.37583000 |
| H  | -2.39070400 | -1.78731900 | -2.94046800 |
| H  | -2.75719200 | -0.15913200 | -3.52757300 |
| H  | -0.97918300 | 0.76490400  | 1.08695900  |
| B  | 1.36401600  | -1.17728100 | -2.39863900 |
| F  | 0.46456600  | -0.46890200 | -1.55555900 |
| F  | 0.73795200  | -1.39033900 | -3.62651700 |
| F  | 1.65833800  | -2.40091600 | -1.78588800 |
| F  | 2.51943700  | -0.41630200 | -2.56128900 |

|   |             |            |             |
|---|-------------|------------|-------------|
| N | -1.01713500 | 2.00815700 | 1.44136300  |
| C | -0.19041800 | 1.91230700 | 2.67567000  |
| C | 0.05420900  | 3.22019100 | 3.41661500  |
| H | 0.76849500  | 1.47916900 | 2.36983600  |
| H | -0.68739800 | 1.18487500 | 3.32808100  |
| H | 0.70921200  | 3.02177300 | 4.26752400  |
| H | 0.55175000  | 3.95412800 | 2.77857400  |
| H | -0.86632300 | 3.66009200 | 3.80428700  |
| C | -0.41097300 | 2.93728800 | 0.44273900  |
| C | -0.61683000 | 2.51373800 | -1.00769000 |
| H | 0.66516500  | 2.96890200 | 0.64333100  |
| H | -0.79502300 | 3.94821800 | 0.62292400  |
| H | -0.01489800 | 3.16780800 | -1.64395400 |
| H | -0.27912800 | 1.48905300 | -1.18345600 |
| H | -1.65599200 | 2.59174100 | -1.32757100 |
| C | -2.42853800 | 2.32321700 | 1.79436400  |
| C | -3.35242800 | 2.58985100 | 0.61742800  |
| H | -2.43789700 | 3.18920000 | 2.46424200  |
| H | -2.79555200 | 1.46262900 | 2.36490100  |
| H | -4.36979500 | 2.69475500 | 1.00251400  |
| H | -3.09444500 | 3.51789900 | 0.10221500  |
| H | -3.35083700 | 1.76752600 | -0.10099900 |

NHC-Et<sub>3</sub>NH<sup>+</sup>·BF<sub>4</sub><sup>-</sup>

|    |             |             |             |
|----|-------------|-------------|-------------|
| C  | -3.67466200 | -1.08632600 | -1.45343100 |
| C  | -2.41686900 | -0.57028200 | -1.14701000 |
| C  | -2.25526000 | 0.54014900  | -0.34232400 |
| C  | -3.40258700 | 1.14793800  | 0.14843800  |
| C  | -4.67441000 | 0.67479600  | -0.15437000 |
| C  | -4.81225100 | -0.45743600 | -0.96288100 |
| C  | -3.52874200 | -2.33291000 | -2.29949800 |
| C  | -2.06732300 | -2.74108200 | -2.05844600 |
| C  | -1.34806100 | -1.39107700 | -1.82198700 |
| H  | -1.27294600 | 0.87302500  | -0.03634500 |
| H  | -5.54783100 | 1.16905500  | 0.25509800  |
| H  | -5.80267300 | -0.84545600 | -1.17910300 |
| H  | -4.20350200 | -3.14117100 | -2.00946500 |
| H  | -1.62074100 | -3.30922000 | -2.88558100 |
| H  | -1.07110500 | -0.94490000 | -2.78496000 |
| H  | -3.69081300 | -2.11478200 | -3.36095900 |
| Br | -3.17917000 | 2.63587000  | 1.29939500  |
| O  | -2.05243900 | -3.50252000 | -0.86669400 |
| C  | -0.76462900 | -3.90666900 | -0.45491400 |
| H  | -0.86616100 | -4.33537000 | 0.54100700  |

|   |             |             |             |
|---|-------------|-------------|-------------|
| H | -0.35701300 | -4.66230700 | -1.14214300 |
| N | -0.12784900 | -1.57512900 | -1.05744800 |
| C | 0.88191800  | -0.67715100 | -0.89446900 |
| C | 0.16891400  | -2.73584400 | -0.39875700 |
| N | 1.34437500  | -2.66310200 | 0.15030300  |
| N | 1.75470900  | -1.39115500 | -0.16965600 |
| C | 3.08124700  | -0.95464800 | 0.14906700  |
| C | 3.42951700  | -0.68886200 | 1.47706200  |
| C | 3.98853200  | -0.81258300 | -0.91080800 |
| C | 4.71574600  | -0.19704500 | 1.71552900  |
| C | 5.25780000  | -0.31726700 | -0.61905000 |
| C | 5.63208300  | 0.01252300  | 0.68566300  |
| H | 5.00389500  | 0.02853400  | 2.73941200  |
| H | 5.97463500  | -0.19547500 | -1.42768100 |
| C | 6.99153500  | 0.59778400  | 0.96707800  |
| H | 7.29796600  | 0.41041900  | 1.99826500  |
| H | 7.74782900  | 0.18009700  | 0.29838000  |
| H | 6.98065200  | 1.68244700  | 0.81566300  |
| C | 3.62374400  | -1.22393400 | -2.31552100 |
| H | 2.85016800  | -0.58135000 | -2.74587500 |
| H | 4.50199000  | -1.18817600 | -2.96201500 |
| H | 3.22595000  | -2.24350200 | -2.32571300 |
| C | 2.47472300  | -0.94516200 | 2.61014600  |
| H | 1.46079400  | -0.62212300 | 2.37346400  |
| H | 2.41646700  | -2.01837300 | 2.81853900  |
| H | 2.81882500  | -0.44251800 | 3.51625600  |
| H | 1.00812800  | 1.08682200  | -1.04651500 |
| B | -1.33856600 | -1.18434900 | 2.37721000  |
| F | -0.42046000 | -0.47391200 | 1.55825300  |
| F | -0.69856800 | -1.50925200 | 3.57429300  |
| F | -1.71660200 | -2.34861100 | 1.70052500  |
| F | -2.44491700 | -0.37081400 | 2.61781000  |
| N | 1.02283600  | 2.13429400  | -1.36139100 |
| C | 0.20021800  | 2.06586300  | -2.61422500 |
| C | -0.03940200 | 3.40328100  | -3.29379100 |
| H | -0.74957500 | 1.60924000  | -2.31944000 |
| H | 0.71437200  | 1.36460300  | -3.27799800 |
| H | -0.68493100 | 3.23531200  | -4.15796800 |
| H | -0.54828900 | 4.10759900  | -2.63228500 |
| H | 0.88279400  | 3.86094400  | -3.65562500 |
| C | 0.38893800  | 3.01400700  | -0.32055500 |
| C | 0.59341800  | 2.52391300  | 1.10688200  |
| H | -0.68376600 | 3.03294900  | -0.53599400 |
| H | 0.77029500  | 4.02867800  | -0.46774100 |

|     |             |             |             |
|-----|-------------|-------------|-------------|
| H   | -0.05897500 | 3.11089400  | 1.75777000  |
| H   | 0.30585700  | 1.47513800  | 1.22131800  |
| H   | 1.61882400  | 2.64429700  | 1.45438200  |
| C   | 2.44808300  | 2.46772200  | -1.68048900 |
| C   | 3.35302800  | 2.62274200  | -0.47122700 |
| H   | 2.44738300  | 3.38501300  | -2.27333900 |
| H   | 2.80308800  | 1.65058700  | -2.31535800 |
| H   | 4.37928200  | 2.72231900  | -0.83256000 |
| H   | 3.11299700  | 3.51940400  | 0.10374700  |
| H   | 3.31433500  | 1.74809800  | 0.18277600  |
| R2C |             |             |             |
| C   | 4.52701800  | 0.36627900  | -1.46959100 |
| C   | 3.14921100  | 0.39709900  | -1.25445200 |
| C   | 2.50072600  | -0.59265300 | -0.52244400 |
| C   | 3.28339700  | -1.64429100 | -0.05419000 |
| C   | 4.66088400  | -1.69793100 | -0.25554600 |
| C   | 5.29169600  | -0.67604500 | -0.95933800 |
| C   | 4.97503800  | 1.53551700  | -2.31335100 |
| C   | 3.76993000  | 2.48137000  | -2.30116600 |
| C   | 2.56462400  | 1.54009900  | -2.05389800 |
| H   | 1.44005100  | -0.56945900 | -0.27894800 |
| H   | 5.22945900  | -2.53190300 | 0.13905400  |
| H   | 6.36597300  | -0.70355000 | -1.11062000 |
| H   | 5.85660800  | 2.04572200  | -1.91886000 |
| H   | 3.65131000  | 3.04820200  | -3.23342000 |
| H   | 2.17431800  | 1.16524700  | -3.00437400 |
| H   | 5.19629100  | 1.21658500  | -3.33722300 |
| Br  | 2.44092700  | -3.07919900 | 0.85069200  |
| O   | 3.92618400  | 3.37086500  | -1.21211800 |
| C   | 2.87653800  | 4.30876700  | -1.13399900 |
| H   | 3.04441300  | 4.93003200  | -0.25836500 |
| H   | 2.83371300  | 4.92811900  | -2.04107800 |
| N   | 1.47864700  | 2.28210700  | -1.41499100 |
| C   | 0.23908500  | 1.87948700  | -1.12808600 |
| C   | 1.58478400  | 3.57097500  | -0.96930800 |
| N   | 0.45488300  | 3.98630400  | -0.47258300 |
| N   | -0.37276200 | 2.91182500  | -0.57509300 |
| C   | -1.75329900 | 2.99894900  | -0.18891600 |
| C   | -2.04584500 | 3.38057400  | 1.12575000  |
| C   | -2.73174600 | 2.74704200  | -1.15749300 |
| C   | -3.39331900 | 3.50586100  | 1.45816400  |
| C   | -4.06184300 | 2.89065900  | -0.76380100 |
| C   | -4.41056900 | 3.26591200  | 0.53221200  |

|   |             |             |             |
|---|-------------|-------------|-------------|
| H | -3.65200600 | 3.79288500  | 2.47481200  |
| H | -4.84368100 | 2.70546900  | -1.49420700 |
| C | -5.85455000 | 3.41063200  | 0.93456200  |
| H | -6.03418100 | 4.38336100  | 1.40051900  |
| H | -6.51634100 | 3.31025400  | 0.07188100  |
| H | -6.13088400 | 2.64146700  | 1.66272300  |
| C | -2.39473300 | 2.36655300  | -2.57792400 |
| H | -1.60276000 | 3.00197800  | -2.98633200 |
| H | -2.06052200 | 1.32572700  | -2.66079600 |
| H | -3.27903600 | 2.47649100  | -3.20779800 |
| C | -0.96524600 | 3.62717200  | 2.14358500  |
| H | -0.14741100 | 2.90795600  | 2.05977600  |
| H | -0.52593100 | 4.62037900  | 2.01102200  |
| H | -1.38157200 | 3.56914700  | 3.15139700  |
| H | -0.20071700 | 0.91523600  | -1.34635400 |
| B | 2.56191100  | 2.51695500  | 2.15474700  |
| F | 1.70627500  | 1.85461600  | 1.23654800  |
| F | 1.83627300  | 2.79024000  | 3.32052000  |
| F | 2.98742100  | 3.72228100  | 1.57835600  |
| F | 3.65415000  | 1.70440900  | 2.43488600  |
| N | -0.25393900 | -1.36784400 | 1.93865400  |
| C | -1.03855400 | -2.54684900 | 1.59758100  |
| C | -2.09559200 | -3.05394400 | 2.58927900  |
| H | -0.32326200 | -3.36236500 | 1.42188700  |
| H | -1.51687100 | -2.35253400 | 0.63207300  |
| H | -2.46607100 | -4.02564000 | 2.24710000  |
| H | -1.67590500 | -3.19083600 | 3.59020300  |
| H | -2.95593800 | -2.38457900 | 2.67133000  |
| C | 0.47159600  | -1.51232500 | 3.19430400  |
| C | 1.60327900  | -0.50559500 | 3.33024400  |
| H | 0.88833500  | -2.52689800 | 3.20362300  |
| H | -0.19379500 | -1.44423400 | 4.07348800  |
| H | 2.19453800  | -0.72486700 | 4.22445200  |
| H | 2.25985600  | -0.54743500 | 2.45760500  |
| H | 1.24357600  | 0.52254800  | 3.41319400  |
| C | -0.92603600 | -0.08128000 | 1.77352800  |
| C | -1.86232700 | 0.36133900  | 2.90648300  |
| H | -1.48358900 | -0.13005300 | 0.82758000  |
| H | -0.15353400 | 0.68598400  | 1.63838900  |
| H | -2.42201300 | 1.25033600  | 2.60391600  |
| H | -2.58525200 | -0.41397600 | 3.17276800  |
| H | -1.29508400 | 0.61299300  | 3.80820900  |
| C | 0.24969200  | -3.41649700 | -1.83208300 |
| C | -0.23330600 | -2.19488100 | -2.18029600 |

|   |             |             |             |
|---|-------------|-------------|-------------|
| H | 1.28716800  | -3.60165300 | -2.11191800 |
| C | 0.67119700  | -1.31459800 | -2.94396300 |
| H | 1.64473200  | -1.76081200 | -3.21715100 |
| O | 0.39162400  | -0.17223900 | -3.26177900 |
| C | -0.39602500 | -4.51921800 | -1.13227000 |
| C | 0.43038800  | -5.53005800 | -0.61346500 |
| C | -1.78551200 | -4.61750800 | -0.95105300 |
| C | -0.10996100 | -6.58498500 | 0.11024200  |
| H | 1.50496100  | -5.45989800 | -0.75509500 |
| C | -2.32316000 | -5.68430300 | -0.24234800 |
| H | -2.44145500 | -3.86199000 | -1.36668000 |
| C | -1.48884700 | -6.66215400 | 0.30003600  |
| H | 0.54085000  | -7.34960300 | 0.52035300  |
| H | -3.39776100 | -5.75237800 | -0.10925400 |
| H | -1.91407600 | -7.48679300 | 0.86260400  |
| C | -1.51576300 | -1.65092300 | -1.86402000 |
| C | -2.58348900 | -1.14014000 | -1.59467800 |
| C | -3.87151800 | -0.62144000 | -1.23362200 |
| C | -4.24425300 | -0.55507400 | 0.11741700  |
| C | -4.77625000 | -0.21714300 | -2.22594200 |
| C | -5.50552100 | -0.08850100 | 0.46647400  |
| H | -3.54288200 | -0.87577900 | 0.88133100  |
| C | -6.04107000 | 0.23567200  | -1.86704200 |
| H | -4.48288500 | -0.27428500 | -3.26912000 |
| C | -6.40679500 | 0.30248700  | -0.52298500 |
| H | -5.78734000 | -0.03826200 | 1.51341600  |
| H | -6.74238100 | 0.53811800  | -2.63774700 |
| H | -7.39406500 | 0.65840800  | -0.24637400 |

R2C'

|   |            |             |             |
|---|------------|-------------|-------------|
| C | 2.31327200 | -3.53966700 | -1.11632700 |
| C | 1.72901200 | -2.31008700 | -0.79586900 |
| C | 0.78896900 | -2.19530900 | 0.21848600  |
| C | 0.47992100 | -3.35761900 | 0.91970300  |
| C | 1.07618900 | -4.58327300 | 0.64624200  |
| C | 2.00079900 | -4.67939300 | -0.39106100 |
| C | 3.25045200 | -3.39859300 | -2.29073600 |
| C | 3.56949400 | -1.90596500 | -2.26802900 |
| C | 2.24493700 | -1.27030500 | -1.77607700 |
| H | 0.30543400 | -1.25947700 | 0.48341400  |
| H | 0.80700800 | -5.45498700 | 1.23165100  |
| H | 2.46716200 | -5.63197400 | -0.62173300 |
| H | 4.16297600 | -3.99205800 | -2.20752800 |
| H | 3.90134200 | -1.48974200 | -3.22767400 |



|    |             |             |             |
|----|-------------|-------------|-------------|
| H  | 1.54637200  | -1.14290600 | -2.61063000 |
| H  | 2.74289900  | -3.66357200 | -3.22616800 |
| Br | -0.86558200 | -3.29633100 | 2.25182700  |
| O  | 4.56613200  | -1.73959300 | -1.27391800 |
| C  | 4.97732200  | -0.40862000 | -1.08017100 |
| H  | 5.60552800  | -0.38045600 | -0.19215400 |
| H  | 5.53756000  | -0.03669900 | -1.94983300 |
| N  | 2.53916300  | 0.06627100  | -1.24916700 |
| C  | 1.72198100  | 1.10645300  | -1.05547300 |
| C  | 3.78872100  | 0.47506200  | -0.86991200 |
| N  | 3.77368700  | 1.71541800  | -0.47195000 |
| N  | 2.47274500  | 2.09178400  | -0.59037800 |
| C  | 2.08241700  | 3.45844900  | -0.34986000 |
| C  | 1.96837900  | 3.91036700  | 0.96597100  |
| C  | 1.89484200  | 4.27904900  | -1.46786400 |
| C  | 1.58147200  | 5.24054600  | 1.14266600  |
| C  | 1.51187800  | 5.59611500  | -1.23272300 |
| C  | 1.33686100  | 6.08838000  | 0.06339700  |
| H  | 1.47186400  | 5.61821800  | 2.15612200  |
| H  | 1.35504100  | 6.25630000  | -2.08187900 |
| C  | 0.88220600  | 7.50704000  | 0.28672900  |
| H  | 1.21370300  | 7.88032300  | 1.25781100  |
| H  | 1.26543200  | 8.17110800  | -0.49127400 |
| H  | -0.21067900 | 7.56695800  | 0.26298600  |
| C  | 2.11211500  | 3.76431900  | -2.86548200 |
| H  | 3.05565100  | 3.21541900  | -2.94305200 |
| H  | 1.29902900  | 3.09556000  | -3.16061000 |
| H  | 2.14162900  | 4.59460900  | -3.57253300 |
| C  | 2.27528400  | 3.02959100  | 2.14440600  |
| H  | 2.03054500  | 1.98283200  | 1.96370100  |
| H  | 3.34617300  | 3.06078200  | 2.37139300  |
| H  | 1.73605500  | 3.37910200  | 3.02791400  |
| H  | 0.66349200  | 1.17033000  | -1.28494200 |
| B  | 3.08570200  | -0.58838300 | 2.32147300  |
| F  | 2.15418200  | -0.02112300 | 1.41026100  |
| F  | 3.25035600  | 0.28880100  | 3.39265800  |
| F  | 4.30236100  | -0.75831600 | 1.64275600  |
| F  | 2.60038000  | -1.81759500 | 2.75734100  |
| N  | -1.67912600 | 0.04714900  | 1.87123400  |
| C  | -3.09069100 | 0.10002400  | 1.50558600  |
| C  | -3.91295600 | -1.07723900 | 2.01778300  |
| H  | -3.13382100 | 0.09916500  | 0.41215700  |
| H  | -3.57545100 | 1.03858100  | 1.84025900  |
| H  | -4.88979900 | -1.07609500 | 1.52421500  |

|   |             |             |             |
|---|-------------|-------------|-------------|
| H | -3.40360600 | -2.01949400 | 1.79676700  |
| H | -4.08488400 | -1.02716400 | 3.09611200  |
| C | -1.48277800 | 0.01204900  | 3.31780200  |
| C | -0.01692600 | -0.02660400 | 3.72717200  |
| H | -1.96268900 | -0.90036100 | 3.68775900  |
| H | -1.99490100 | 0.85966500  | 3.81499100  |
| H | 0.05485400  | -0.18700200 | 4.80690800  |
| H | 0.50734100  | -0.84092000 | 3.22073100  |
| H | 0.51252000  | 0.90179800  | 3.49588600  |
| C | -0.91530200 | 1.09802200  | 1.19977400  |
| C | -1.22721900 | 2.54428300  | 1.60016400  |
| H | -1.10081900 | 0.97632400  | 0.12566100  |
| H | 0.14865500  | 0.89557600  | 1.36023000  |
| H | -0.61891100 | 3.23266900  | 1.00450000  |
| H | -2.27996300 | 2.79611300  | 1.43354900  |
| H | -0.99726400 | 2.72598000  | 2.65548500  |
| C | -4.10807000 | 2.25800000  | -1.11139900 |
| C | -2.89622700 | 1.92728100  | -1.62618900 |
| H | -4.22203300 | 3.30326300  | -0.82285900 |
| C | -1.87094500 | 2.99099500  | -1.66437000 |
| H | -2.23321900 | 4.00788600  | -1.42563200 |
| O | -0.69887600 | 2.78489300  | -1.90745300 |
| C | -5.26169500 | 1.41702400  | -0.81525400 |
| C | -6.24376600 | 1.95012100  | 0.03643700  |
| C | -5.42691300 | 0.10903200  | -1.30393700 |
| C | -7.34617100 | 1.19414100  | 0.41355200  |
| H | -6.12610800 | 2.96279600  | 0.41185800  |
| C | -6.53904500 | -0.63809500 | -0.93634200 |
| H | -4.69205700 | -0.31631400 | -1.97616900 |
| C | -7.49553100 | -0.10349100 | -0.07262100 |
| H | -8.08910100 | 1.61646900  | 1.08141200  |
| H | -6.65953300 | -1.64428500 | -1.32354300 |
| H | -8.35746600 | -0.69593600 | 0.21610000  |
| C | -2.45681000 | 0.62186600  | -1.99575600 |
| C | -2.00292000 | -0.47638900 | -2.23890200 |
| C | -1.54113400 | -1.81835600 | -2.42690500 |
| C | -0.78908700 | -2.17918200 | -3.55474000 |
| C | -1.83510300 | -2.77763000 | -1.44671100 |
| C | -0.33090700 | -3.48491200 | -3.68948700 |
| H | -0.57319700 | -1.43393500 | -4.31381000 |
| C | -1.38244300 | -4.08241800 | -1.59650700 |
| H | -2.38576300 | -2.48000300 | -0.55793300 |
| C | -0.62537700 | -4.43617200 | -2.71155200 |
| H | 0.25115700  | -3.76390000 | -4.56199700 |

|     |             |             |             |
|-----|-------------|-------------|-------------|
| H   | -1.59286400 | -4.81105300 | -0.82011300 |
| H   | -0.25830700 | -5.45198200 | -2.81682400 |
| TS1 |             |             |             |
| C   | 4.55725900  | 0.37670700  | 0.14214100  |
| C   | 3.20891200  | 0.14857800  | 0.40257700  |
| C   | 2.24923700  | 1.12722100  | 0.22210000  |
| C   | 2.67700100  | 2.36808800  | -0.22998400 |
| C   | 4.01885200  | 2.63680100  | -0.48648300 |
| C   | 4.96916900  | 1.62974200  | -0.29879000 |
| C   | 5.35064300  | -0.88521900 | 0.40211900  |
| C   | 4.27734600  | -1.98461000 | 0.37493000  |
| C   | 2.99868700  | -1.26695800 | 0.87664200  |
| H   | 1.20143400  | 0.92829900  | 0.40197900  |
| H   | 4.31794400  | 3.61685300  | -0.83985200 |
| H   | 6.01388500  | 1.83112400  | -0.51355300 |
| H   | 6.12075400  | -1.08671000 | -0.34573400 |
| H   | 4.52834500  | -2.86176000 | 0.98407700  |
| H   | 2.89871200  | -1.29807700 | 1.96481600  |
| H   | 5.82982200  | -0.85147700 | 1.38633500  |
| Br  | 1.35998200  | 3.70982800  | -0.50591900 |
| O   | 4.12597500  | -2.36932200 | -0.98557800 |
| C   | 3.12631600  | -3.34977200 | -1.16978300 |
| H   | 3.08079500  | -3.59026900 | -2.23208400 |
| H   | 3.36452900  | -4.26383000 | -0.60767200 |
| N   | 1.79491300  | -1.86950400 | 0.30460500  |
| C   | 0.51270500  | -1.50019800 | 0.53735000  |
| C   | 1.81553200  | -2.79413000 | -0.70782100 |
| N   | 0.61249800  | -3.05033400 | -1.12861200 |
| N   | -0.17030000 | -2.24044200 | -0.33809000 |
| C   | -1.58659800 | -2.15042000 | -0.54195300 |
| C   | -2.41352000 | -3.08949700 | 0.07370400  |
| C   | -2.07504700 | -1.07685000 | -1.29363900 |
| C   | -3.79241700 | -2.91889700 | -0.06353300 |
| C   | -3.45686900 | -0.95149900 | -1.40583700 |
| C   | -4.32780500 | -1.85510400 | -0.79140100 |
| H   | -4.46079700 | -3.62930900 | 0.41630900  |
| H   | -3.86546500 | -0.10905500 | -1.95956900 |
| C   | -5.81709500 | -1.67078200 | -0.92185600 |
| H   | -6.09105800 | -0.62734200 | -0.73895900 |
| H   | -6.15386400 | -1.92579000 | -1.93142000 |
| H   | -6.35974000 | -2.30182800 | -0.21514700 |
| C   | -1.14430800 | -0.05864500 | -1.89393500 |
| H   | -0.76424900 | 0.61269400  | -1.11329600 |

|    |             |             |             |
|----|-------------|-------------|-------------|
| H  | -0.28199900 | -0.53217200 | -2.37173300 |
| H  | -1.66673200 | 0.54916900  | -2.63448800 |
| C  | -1.82689300 | -4.22267400 | 0.87279700  |
| H  | -1.16555800 | -4.83585800 | 0.25401200  |
| H  | -1.22923200 | -3.84457600 | 1.70896400  |
| H  | -2.61579100 | -4.85918700 | 1.27585300  |
| C  | -2.18870200 | 0.39120600  | 1.47645200  |
| C  | -0.87860400 | 0.52159700  | 1.70256900  |
| H  | -2.65649800 | -0.57708800 | 1.67010100  |
| H  | -0.37250200 | 1.47916800  | 1.57942700  |
| C  | -0.01449300 | -0.60963200 | 2.19537200  |
| H  | -0.64539600 | -1.48998300 | 2.46743400  |
| O  | 1.03135700  | -0.35530300 | 2.84362600  |
| C  | -3.08843800 | 1.42456100  | 0.93994600  |
| C  | -4.47363500 | 1.22635100  | 1.01617800  |
| C  | -2.61260100 | 2.58238200  | 0.30775300  |
| C  | -5.36151100 | 2.16139300  | 0.49420700  |
| H  | -4.85049300 | 0.32078800  | 1.48596900  |
| C  | -3.50007500 | 3.51716300  | -0.21488600 |
| H  | -1.54309400 | 2.74739900  | 0.20484200  |
| C  | -4.87640800 | 3.31245300  | -0.12396200 |
| H  | -6.43116300 | 1.99029500  | 0.56686500  |
| H  | -3.11540500 | 4.40580400  | -0.70534900 |
| H  | -5.56484200 | 4.04158000  | -0.53849900 |
| MI |             |             |             |
| C  | -4.46021500 | -1.67798600 | -0.36084200 |
| C  | -3.26361700 | -0.96521300 | -0.43405800 |
| C  | -3.24136000 | 0.40744700  | -0.62842500 |
| C  | -4.46958800 | 1.05578200  | -0.70166800 |
| C  | -5.68032500 | 0.37264500  | -0.61754600 |
| C  | -5.67611000 | -1.01252500 | -0.45685600 |
| C  | -4.18163500 | -3.15403300 | -0.19660000 |
| C  | -2.75310100 | -3.15941000 | 0.35223000  |
| C  | -2.09856700 | -1.92542100 | -0.31893000 |
| H  | -2.30266700 | 0.92957700  | -0.77223800 |
| H  | -6.61431600 | 0.91897300  | -0.68139100 |
| H  | -6.61506700 | -1.55381000 | -0.39805500 |
| H  | -4.85878500 | -3.66222300 | 0.49311800  |
| H  | -2.19751200 | -4.08614900 | 0.16225300  |
| H  | -1.68078100 | -2.13541900 | -1.30401900 |
| H  | -4.22101200 | -3.66940700 | -1.16217600 |
| Br | -4.49332900 | 2.94110200  | -0.93781200 |
| O  | -2.88476100 | -2.94542100 | 1.75338200  |

|   |             |             |             |
|---|-------------|-------------|-------------|
| C | -1.65011200 | -2.89640900 | 2.42344000  |
| H | -1.84043500 | -2.67425000 | 3.47391800  |
| H | -1.12199700 | -3.85854000 | 2.35564500  |
| N | -0.98340200 | -1.43916000 | 0.51585000  |
| C | -0.01813500 | -0.54482600 | 0.22174000  |
| C | -0.79484200 | -1.82812900 | 1.81865600  |
| N | 0.21662800  | -1.21384400 | 2.35635400  |
| N | 0.68375800  | -0.41743000 | 1.34903800  |
| C | 1.80729300  | 0.45123100  | 1.55742500  |
| C | 1.56935500  | 1.81822500  | 1.70110600  |
| C | 3.08675800  | -0.11438300 | 1.56906200  |
| C | 2.68577700  | 2.64902000  | 1.82114500  |
| C | 4.16397900  | 0.75551200  | 1.69901800  |
| C | 3.98309200  | 2.13752000  | 1.81354500  |
| H | 2.53320700  | 3.72003800  | 1.92545200  |
| H | 5.17189300  | 0.34802400  | 1.68514500  |
| C | 5.17761100  | 3.04600800  | 1.94476000  |
| H | 5.59663900  | 2.99031600  | 2.95427000  |
| H | 5.96727400  | 2.75282200  | 1.24727100  |
| H | 4.90958600  | 4.08574300  | 1.74810100  |
| C | 3.28210500  | -1.59493700 | 1.39593900  |
| H | 2.82820300  | -2.15325600 | 2.21957200  |
| H | 2.81387600  | -1.93187500 | 0.46435100  |
| H | 4.34512100  | -1.83692900 | 1.35059300  |
| C | 0.16969500  | 2.37573300  | 1.72575400  |
| H | -0.27211700 | 2.39656600  | 0.72355400  |
| H | -0.48451900 | 1.77306200  | 2.36206100  |
| H | 0.17559600  | 3.39758200  | 2.10752000  |
| C | 2.76069800  | 0.21100500  | -1.52018000 |
| C | 1.62994700  | -0.49802300 | -1.57393000 |
| H | 2.69732400  | 1.24517700  | -1.17401500 |
| H | 1.60816300  | -1.53627500 | -1.90593500 |
| C | 0.25620300  | 0.06531200  | -1.19838400 |
| H | 0.43161600  | 1.15162000  | -0.97085600 |
| O | -0.71475100 | -0.22913500 | -2.04228700 |
| C | 4.12569900  | -0.26061900 | -1.80721000 |
| C | 5.20252200  | 0.59643900  | -1.54339900 |
| C | 4.40382600  | -1.54407100 | -2.29992000 |
| C | 6.51580800  | 0.18829100  | -1.75719600 |
| H | 4.99796900  | 1.59203300  | -1.15682000 |
| C | 5.71443200  | -1.95268300 | -2.51609500 |
| H | 3.58845300  | -2.22700100 | -2.51863300 |
| C | 6.77698200  | -1.09010400 | -2.24380900 |
| H | 7.33423400  | 0.86879700  | -1.54384700 |

|     |             |             |             |
|-----|-------------|-------------|-------------|
| H   | 5.90968700  | -2.94931000 | -2.89928100 |
| H   | 7.79903600  | -1.41335000 | -2.41225200 |
| TS2 |             |             |             |
| C   | 2.74070600  | 4.37952500  | 0.81176900  |
| C   | 1.79089200  | 3.36716300  | 0.69274200  |
| C   | 0.43632300  | 3.61712100  | 0.83651400  |
| C   | 0.04934200  | 4.93142300  | 1.06113700  |
| C   | 0.97094500  | 5.96747300  | 1.18231700  |
| C   | 2.33447700  | 5.68522700  | 1.06554500  |
| C   | 4.12818000  | 3.80263600  | 0.63234300  |
| C   | 3.85894200  | 2.48646800  | -0.11085700 |
| C   | 2.46689700  | 2.04668100  | 0.41302300  |
| H   | -0.29783200 | 2.82857300  | 0.76125300  |
| H   | 0.63021000  | 6.98108500  | 1.35964400  |
| H   | 3.05935200  | 6.48802600  | 1.15792100  |
| H   | 4.80395800  | 4.43654500  | 0.05400300  |
| H   | 4.62035900  | 1.71061600  | 0.05597700  |
| H   | 2.54836800  | 1.47168500  | 1.33725400  |
| H   | 4.59403000  | 3.60095800  | 1.60325000  |
| Br  | -1.81605300 | 5.28249000  | 1.19093500  |
| O   | 3.80731800  | 2.81930000  | -1.49085700 |
| C   | 3.48907300  | 1.70217700  | -2.29455400 |
| H   | 3.47193400  | 2.02103100  | -3.33710500 |
| H   | 4.24393000  | 0.91325800  | -2.17391500 |
| N   | 1.76288200  | 1.22789800  | -0.57462600 |
| C   | 0.46678700  | 0.75656400  | -0.49653700 |
| C   | 2.14029300  | 1.19769700  | -1.89811500 |
| N   | 1.20704500  | 0.73933400  | -2.66286600 |
| N   | 0.16649000  | 0.45786500  | -1.80197400 |
| C   | -1.10041100 | 0.08579000  | -2.33781800 |
| C   | -1.33963000 | -1.26223400 | -2.61079100 |
| C   | -2.07178800 | 1.07605800  | -2.52655800 |
| C   | -2.61405800 | -1.62240500 | -3.05203200 |
| C   | -3.32635800 | 0.67190600  | -2.97550300 |
| C   | -3.61858500 | -0.67078200 | -3.22926000 |
| H   | -2.82766500 | -2.67069500 | -3.24744800 |
| H   | -4.10715600 | 1.41916600  | -3.10016700 |
| C   | -5.00151500 | -1.07150900 | -3.67261500 |
| H   | -5.11616600 | -2.15783600 | -3.68042900 |
| H   | -5.75463200 | -0.64853400 | -3.00014000 |
| H   | -5.21487100 | -0.69988100 | -4.67949100 |
| C   | -1.79705300 | 2.51348500  | -2.17753600 |
| H   | -1.96345600 | 2.68088300  | -1.10505600 |

|    |             |             |             |
|----|-------------|-------------|-------------|
| H  | -0.76378500 | 2.79329100  | -2.40029400 |
| H  | -2.46669600 | 3.17779300  | -2.72725900 |
| C  | -0.27694300 | -2.29715700 | -2.36228300 |
| H  | 0.68051500  | -2.01679300 | -2.81246600 |
| H  | -0.11306200 | -2.41310900 | -1.28282700 |
| H  | -0.58041200 | -3.26750800 | -2.76071800 |
| C  | -2.72144500 | 0.14457600  | 0.28400900  |
| C  | -1.66210300 | 0.76032200  | 0.83057200  |
| H  | -2.58148000 | -0.75656800 | -0.31277500 |
| C  | -0.19991600 | 0.45373400  | 0.74362000  |
| H  | -0.05395300 | -0.96135000 | 0.71814200  |
| O  | 0.47467600  | 0.72677600  | 1.87545700  |
| C  | -4.11104000 | 0.61872700  | 0.37507100  |
| C  | -5.13791100 | -0.18815800 | -0.14001800 |
| C  | -4.46489700 | 1.86957600  | 0.90658800  |
| C  | -6.46889200 | 0.21256400  | -0.09160000 |
| H  | -4.87018600 | -1.14177500 | -0.58894200 |
| C  | -5.79671300 | 2.26880200  | 0.96091300  |
| H  | -3.69309300 | 2.55180500  | 1.25271800  |
| C  | -6.80727900 | 1.44335300  | 0.46919100  |
| H  | -7.24131600 | -0.43550000 | -0.49686300 |
| H  | -6.04633900 | 3.23990000  | 1.37758200  |
| H  | -7.84350900 | 1.76304100  | 0.50811700  |
| C  | 4.79018900  | -1.37311300 | 1.18761000  |
| C  | 3.45088900  | -1.48041600 | 0.81003800  |
| C  | 3.07297400  | -1.58758000 | -0.51994000 |
| C  | 4.08728700  | -1.59050200 | -1.47328700 |
| C  | 5.43180700  | -1.48139900 | -1.12492900 |
| C  | 5.78769500  | -1.36843100 | 0.21995500  |
| C  | 4.90062300  | -1.28410600 | 2.69311500  |
| C  | 3.54706800  | -1.82384400 | 3.16889000  |
| C  | 2.57245800  | -1.43057800 | 2.03715500  |
| H  | 2.02968700  | -1.66328500 | -0.81643000 |
| H  | 6.19024300  | -1.48748900 | -1.89935600 |
| H  | 6.83458100  | -1.29382200 | 0.49660400  |
| H  | 5.72079300  | -1.87145200 | 3.11144200  |
| H  | 3.23304000  | -1.43850100 | 4.14646000  |
| H  | 2.10561300  | -0.43717400 | 2.16759700  |
| H  | 5.02389000  | -0.24421000 | 3.01547800  |
| Br | 3.61669200  | -1.69176200 | -3.30590000 |
| O  | 3.66875500  | -3.24263800 | 3.21997400  |
| C  | 2.48954800  | -3.88752400 | 3.65055000  |
| H  | 2.66138800  | -4.96334800 | 3.60082100  |
| H  | 2.24700700  | -3.61626000 | 4.68765800  |

|   |             |             |             |
|---|-------------|-------------|-------------|
| N | 1.44702100  | -2.35468200 | 2.00744000  |
| C | 0.28807800  | -2.16573200 | 1.34386400  |
| C | 1.35055600  | -3.49431900 | 2.75803200  |
| N | 0.18270100  | -4.05007500 | 2.60553700  |
| N | -0.44913300 | -3.20937000 | 1.72210100  |
| C | -1.83294500 | -3.37266400 | 1.38816000  |
| C | -2.19063600 | -4.24421800 | 0.35738300  |
| C | -2.75399400 | -2.59461200 | 2.09491000  |
| C | -3.53958200 | -4.29639100 | 0.00760100  |
| C | -4.09214900 | -2.69657100 | 1.71850400  |
| C | -4.49799600 | -3.52877600 | 0.67386300  |
| H | -3.84828200 | -4.95180200 | -0.80363800 |
| H | -4.83128700 | -2.08808700 | 2.23309000  |
| C | -5.94643600 | -3.59325700 | 0.26170800  |
| H | -6.52885000 | -2.81212200 | 0.75535700  |
| H | -6.04945800 | -3.46480600 | -0.82057400 |
| H | -6.38483000 | -4.56223800 | 0.51902000  |
| C | -2.30995400 | -1.69064800 | 3.21552100  |
| H | -1.87802800 | -2.27815400 | 4.03280500  |
| H | -1.55245200 | -0.97144700 | 2.88375200  |
| H | -3.16097400 | -1.12935300 | 3.60541700  |
| C | -1.16716600 | -5.11983300 | -0.31582600 |
| H | -0.22235700 | -4.59418000 | -0.47449400 |
| H | -0.95002800 | -5.99542900 | 0.30421400  |
| H | -1.53604500 | -5.47136800 | -1.28133200 |
| H | -1.83587200 | 1.59290500  | 1.52109000  |

TS2<sup>N</sup>

|   |             |             |             |
|---|-------------|-------------|-------------|
| C | -4.43141400 | -1.76298100 | -1.47936700 |
| C | -3.34081500 | -1.01427900 | -1.02874100 |
| C | -3.50778500 | 0.30075800  | -0.62694700 |
| C | -4.79716000 | 0.81370300  | -0.59401800 |
| C | -5.90558000 | 0.07586800  | -0.99509500 |
| C | -5.71264200 | -1.22486300 | -1.46408200 |
| C | -3.97174900 | -3.11421300 | -1.97069900 |
| C | -2.64031600 | -3.27105900 | -1.24192900 |
| C | -2.06192400 | -1.83141400 | -1.16937700 |
| H | -2.61914600 | 0.88609300  | -0.43367600 |
| H | -6.89748700 | 0.51160200  | -0.95750100 |
| H | -6.56258100 | -1.80723100 | -1.80625200 |
| H | -4.64820400 | -3.93560300 | -1.72547200 |
| H | -1.94539900 | -3.98443500 | -1.70433900 |
| H | -1.55595100 | -1.55804100 | -2.09795900 |
| H | -3.81724000 | -3.10273100 | -3.05520500 |



|    |             |             |             |
|----|-------------|-------------|-------------|
| Br | -5.02255300 | 2.60937100  | 0.00172400  |
| O  | -2.99080500 | -3.69256900 | 0.07034300  |
| C  | -1.87819600 | -3.95755300 | 0.88549300  |
| H  | -2.23132000 | -3.99553700 | 1.91860000  |
| H  | -1.42209600 | -4.92597200 | 0.63840200  |
| N  | -1.03745400 | -1.79777100 | -0.09932600 |
| C  | 0.15748400  | -1.07736000 | -0.09650600 |
| C  | -0.84043200 | -2.89001800 | 0.72165100  |
| N  | 0.34345200  | -2.93305200 | 1.22893100  |
| N  | 0.97965300  | -1.82120200 | 0.71209100  |
| C  | 2.39325100  | -1.73058000 | 0.84809800  |
| C  | 2.92751200  | -1.34592700 | 2.08038000  |
| C  | 3.20199200  | -2.03032400 | -0.25633400 |
| C  | 4.31048400  | -1.17345600 | 2.16800300  |
| C  | 4.57546400  | -1.84660000 | -0.12233800 |
| C  | 5.14471100  | -1.39912900 | 1.07253300  |
| H  | 4.74189100  | -0.85010500 | 3.11226200  |
| H  | 5.21873900  | -2.04329500 | -0.97721400 |
| C  | 6.63028400  | -1.16492500 | 1.15872100  |
| H  | 6.93402800  | -0.39237700 | 0.44445200  |
| H  | 6.92564400  | -0.84318500 | 2.15936600  |
| H  | 7.18609300  | -2.07406300 | 0.91188500  |
| C  | 2.60243000  | -2.50337200 | -1.55181500 |
| H  | 1.80313400  | -3.22930900 | -1.37443700 |
| H  | 2.17179900  | -1.66111300 | -2.10468700 |
| H  | 3.36525500  | -2.97009300 | -2.17756400 |
| C  | 2.03289200  | -1.12686500 | 3.27028600  |
| H  | 1.15142200  | -0.54371600 | 2.98940000  |
| H  | 1.66971200  | -2.08103500 | 3.66355300  |
| H  | 2.56292200  | -0.59933600 | 4.06607300  |
| C  | 2.77809200  | 0.90685300  | -0.74390400 |
| C  | 1.55217100  | 0.71783500  | -1.25672500 |
| H  | 2.96822900  | 0.68005000  | 0.29988000  |
| H  | 1.35984100  | 1.01347600  | -2.29056900 |
| C  | 0.26383600  | 0.26278100  | -0.63019600 |
| H  | 0.19697800  | 0.96708500  | 0.62633100  |
| O  | -0.81938000 | 0.71460500  | -1.26780500 |
| C  | 3.96443400  | 1.37124700  | -1.47626400 |
| C  | 5.13372500  | 1.64250500  | -0.74848200 |
| C  | 4.00399200  | 1.54044300  | -2.86905800 |
| C  | 6.29401100  | 2.07917500  | -1.37975500 |
| H  | 5.11986300  | 1.50198400  | 0.33073200  |
| C  | 5.16151600  | 1.98111700  | -3.50075700 |
| H  | 3.12528000  | 1.31360100  | -3.46501200 |

|   |             |            |             |
|---|-------------|------------|-------------|
| C | 6.31326800  | 2.25334000 | -2.76224800 |
| H | 7.18355800  | 2.28385100 | -0.79125900 |
| H | 5.16836700  | 2.10461000 | -4.57945800 |
| H | 7.21604000  | 2.59131100 | -3.26043900 |
| N | -0.36071600 | 1.77766600 | 1.56623400  |
| C | 0.53869500  | 2.30429900 | 2.63255700  |
| C | 2.01457200  | 2.29546400 | 2.25998700  |
| H | 0.39087800  | 1.69782300 | 3.53130200  |
| H | 0.21728400  | 3.32201500 | 2.88407100  |
| H | 2.58468600  | 2.81730600 | 3.03320600  |
| H | 2.39385600  | 1.27339500 | 2.19419700  |
| H | 2.19744900  | 2.78360700 | 1.30091000  |
| C | -1.00562300 | 2.89225300 | 0.81802500  |
| C | -0.01615600 | 3.69659900 | -0.00654500 |
| H | -1.51833900 | 3.54226700 | 1.53989400  |
| H | -1.74637000 | 2.45228000 | 0.15367600  |
| H | -0.56814900 | 4.42683700 | -0.60322500 |
| H | 0.69194300  | 4.24742200 | 0.61812200  |
| H | 0.53071000  | 3.03847500 | -0.68530000 |
| C | -1.37097500 | 0.83206800 | 2.11081600  |
| C | -2.48346100 | 1.46851500 | 2.93391800  |
| H | -0.82330400 | 0.09612100 | 2.70827100  |
| H | -1.78733600 | 0.29800600 | 1.25593200  |
| H | -3.06392500 | 0.67942500 | 3.41753000  |
| H | -2.08828600 | 2.12342800 | 3.71656800  |
| H | -3.16769100 | 2.04193100 | 2.30308100  |

TS2<sup>NH</sup>

|   |             |             |             |
|---|-------------|-------------|-------------|
| C | -5.51853500 | -0.43248200 | -0.33136400 |
| C | -4.12578200 | -0.37549200 | -0.32147100 |
| C | -3.44666700 | 0.82525500  | -0.43425300 |
| C | -4.19704400 | 1.98452400  | -0.59528100 |
| C | -5.58654400 | 1.95514900  | -0.64448800 |
| C | -6.25350000 | 0.73391900  | -0.50522100 |
| C | -5.97306900 | -1.85470100 | -0.08536200 |
| C | -4.73849100 | -2.50127600 | 0.56217000  |
| C | -3.55912000 | -1.76281300 | -0.11969200 |
| H | -2.36867800 | 0.89788300  | -0.35127500 |
| H | -6.14515300 | 2.87579700  | -0.76664200 |
| H | -7.33853300 | 0.71288200  | -0.51073300 |
| H | -6.83607900 | -1.93153000 | 0.57907000  |
| H | -4.68030200 | -3.58760300 | 0.42106000  |
| H | -3.31515800 | -2.23953500 | -1.06967200 |
| H | -6.21554800 | -2.36326400 | -1.02454800 |

|    |             |             |             |
|----|-------------|-------------|-------------|
| Br | -3.25288100 | 3.62413000  | -0.71709100 |
| O  | -4.79350200 | -2.19015400 | 1.94436300  |
| C  | -3.65477800 | -2.64643700 | 2.64300000  |
| H  | -3.76676800 | -2.37705800 | 3.69283700  |
| H  | -3.55400300 | -3.73753700 | 2.55943000  |
| N  | -2.35644600 | -1.74729200 | 0.72431300  |
| C  | -1.16304000 | -1.11836600 | 0.49450600  |
| C  | -2.44017700 | -1.98051000 | 2.07856300  |
| N  | -1.39475500 | -1.54700200 | 2.70339700  |
| N  | -0.60911400 | -1.00779300 | 1.71622100  |
| C  | 0.60483900  | -0.33009500 | 2.06159200  |
| C  | 1.76969000  | -1.08869900 | 2.20961800  |
| C  | 0.57062700  | 1.05832400  | 2.20517500  |
| C  | 2.95957500  | -0.40119200 | 2.43066700  |
| C  | 1.78467600  | 1.69922800  | 2.44789300  |
| C  | 2.98548300  | 0.99339500  | 2.53078300  |
| H  | 3.89665500  | -0.94678500 | 2.47848400  |
| H  | 1.79528700  | 2.78341200  | 2.53459800  |
| C  | 4.29352500  | 1.72063700  | 2.68063000  |
| H  | 4.78622200  | 1.80306500  | 1.70616900  |
| H  | 4.14072100  | 2.72534900  | 3.08176900  |
| H  | 4.97675000  | 1.17209800  | 3.33175100  |
| C  | -0.69708500 | 1.85073800  | 2.02967800  |
| H  | -0.81020300 | 2.16862700  | 0.98473700  |
| H  | -1.58622600 | 1.27795700  | 2.30776500  |
| H  | -0.66781500 | 2.75476000  | 2.64122300  |
| C  | 1.72804700  | -2.59299800 | 2.14149400  |
| H  | 1.39996000  | -3.01358900 | 3.09746000  |
| H  | 1.02297900  | -2.94331500 | 1.38033900  |
| H  | 2.71723000  | -2.99573000 | 1.91251700  |
| C  | 1.27873600  | 0.91502100  | -0.72486600 |
| C  | 0.04516600  | 0.50901600  | -1.05070600 |
| H  | 1.98433800  | 0.22275300  | -0.26728300 |
| H  | -0.61749400 | 1.21609400  | -1.56469000 |
| C  | -0.56061200 | -0.83865900 | -0.81412600 |
| H  | 0.41414900  | -1.79407200 | -1.14910900 |
| O  | -1.47090400 | -1.18602900 | -1.85131800 |
| C  | 1.79287000  | 2.28530400  | -0.88149100 |
| C  | 3.17442400  | 2.48516500  | -0.74767800 |
| C  | 0.96583000  | 3.39460300  | -1.11045000 |
| C  | 3.71847600  | 3.75975100  | -0.86430100 |
| H  | 3.81938700  | 1.63446200  | -0.54560400 |
| C  | 1.51523600  | 4.66725000  | -1.22901000 |
| H  | -0.11319400 | 3.27517500  | -1.17496100 |

|   |             |             |             |
|---|-------------|-------------|-------------|
| C | 2.89222300  | 4.85524600  | -1.10878700 |
| H | 4.79108900  | 3.89023400  | -0.75755300 |
| H | 0.86466200  | 5.51874500  | -1.40275900 |
| H | 3.31412200  | 5.85159600  | -1.19399200 |
| N | 1.23071700  | -2.57710000 | -1.82755900 |
| C | 0.89573500  | -3.97835800 | -1.48953900 |
| C | -0.59961500 | -4.26491200 | -1.52466900 |
| H | 1.27588600  | -4.15630500 | -0.47937300 |
| H | 1.43777300  | -4.65943000 | -2.15566900 |
| H | -0.76679000 | -5.30431800 | -1.23394400 |
| H | -1.14157200 | -3.62370200 | -0.82363900 |
| H | -1.02921500 | -4.12178100 | -2.51794700 |
| C | 2.58162300  | -2.17246000 | -1.34771600 |
| C | 3.70568700  | -3.19461300 | -1.47282900 |
| H | 2.47810200  | -1.89372400 | -0.29475600 |
| H | 2.84526600  | -1.25382000 | -1.87626600 |
| H | 4.62898600  | -2.68936000 | -1.17953100 |
| H | 3.55643100  | -4.04813100 | -0.80623100 |
| H | 3.82486900  | -3.57276700 | -2.48998300 |
| C | 0.98142400  | -2.21260200 | -3.24595600 |
| C | 1.97225200  | -2.77202700 | -4.25863400 |
| H | 0.98542200  | -1.11789900 | -3.27704600 |
| H | -0.03589700 | -2.52457200 | -3.48373000 |
| H | 1.63000200  | -2.51131200 | -5.26296300 |
| H | 2.96956900  | -2.34725100 | -4.12698500 |
| H | 2.04502900  | -3.86183400 | -4.20607600 |
| H | -1.93857600 | -0.39306100 | -2.15665500 |
| B | 5.69434200  | -0.28148200 | 0.17197400  |
| F | 6.03729400  | 1.05413800  | -0.08639600 |
| F | 5.95111900  | -0.58818700 | 1.51426000  |
| F | 6.41773400  | -1.13736100 | -0.66212800 |
| F | 4.31778100  | -0.44947400 | -0.09101400 |

TS2<sup>NHCH</sup>

|   |             |            |             |
|---|-------------|------------|-------------|
| C | -0.37550300 | 5.37551300 | -0.67846200 |
| C | 0.14941500  | 4.09322500 | -0.52536500 |
| C | 1.49501600  | 3.82889300 | -0.71115600 |
| C | 2.31390300  | 4.88844900 | -1.08119700 |
| C | 1.81621200  | 6.17523700 | -1.26530000 |
| C | 0.45676400  | 6.42169400 | -1.05846200 |
| C | -1.85188400 | 5.37070800 | -0.34563800 |
| C | -2.00322600 | 4.09648700 | 0.49660900  |
| C | -0.95425200 | 3.14224900 | -0.12291600 |
| H | 1.91259700  | 2.84116900 | -0.56661600 |

|    |             |             |             |
|----|-------------|-------------|-------------|
| H  | 2.48453800  | 6.97887200  | -1.55202800 |
| H  | 0.06844800  | 7.42808200  | -1.17803300 |
| H  | -2.17941700 | 6.24487500  | 0.22066700  |
| H  | -3.01225900 | 3.66099500  | 0.48484600  |
| H  | -1.38047400 | 2.63629500  | -0.99022200 |
| H  | -2.46327400 | 5.29882200  | -1.25175900 |
| Br | 4.16220900  | 4.53139700  | -1.33024500 |
| O  | -1.62814800 | 4.44274600  | 1.81984000  |
| C  | -1.67000800 | 3.33705700  | 2.69348100  |
| H  | -1.34260300 | 3.66652800  | 3.67986700  |
| H  | -2.68711000 | 2.93146200  | 2.77346200  |
| N  | -0.52283900 | 2.12593300  | 0.84176700  |
| C  | 0.33276100  | 1.07579100  | 0.67912500  |
| C  | -0.75127400 | 2.26585000  | 2.19192800  |
| N  | -0.10033700 | 1.38285600  | 2.87731400  |
| N  | 0.56303300  | 0.63982600  | 1.93468100  |
| C  | 1.42958900  | -0.42468300 | 2.35504100  |
| C  | 0.92466300  | -1.72280100 | 2.39234200  |
| C  | 2.75507800  | -0.10734500 | 2.67307400  |
| C  | 1.81615100  | -2.74677400 | 2.72428900  |
| C  | 3.60047600  | -1.15927600 | 3.00788800  |
| C  | 3.15153300  | -2.48471400 | 3.02414900  |
| H  | 1.45198600  | -3.77132200 | 2.73663900  |
| H  | 4.64381600  | -0.94681500 | 3.22914600  |
| C  | 4.10853500  | -3.60054100 | 3.35136900  |
| H  | 5.01694500  | -3.51611700 | 2.74597600  |
| H  | 4.41144000  | -3.56096700 | 4.40201600  |
| H  | 3.65609000  | -4.57706400 | 3.16498100  |
| C  | 3.25749800  | 1.30546900  | 2.56248300  |
| H  | 4.24841100  | 1.39883000  | 3.00899000  |
| H  | 3.33402500  | 1.59559800  | 1.50606300  |
| H  | 2.58310700  | 2.01272400  | 3.05271700  |
| C  | -0.49491300 | -2.02165600 | 2.01197300  |
| H  | -1.20073500 | -1.29518700 | 2.42459400  |
| H  | -0.61797300 | -2.01557000 | 0.92382700  |
| H  | -0.79193700 | -3.01442200 | 2.35489900  |
| C  | 2.93841100  | -0.84937900 | -0.29249200 |
| C  | 2.26521800  | 0.23472200  | -0.69658300 |
| H  | 2.39482500  | -1.68358100 | 0.15246600  |
| H  | 2.79825900  | 1.03838700  | -1.21236400 |
| C  | 0.79829000  | 0.48425200  | -0.56194700 |
| H  | 0.00131100  | -0.66015500 | -0.90599900 |
| O  | 0.34150600  | 1.27329900  | -1.65869900 |
| C  | 4.40054900  | -1.01115900 | -0.34753000 |

|    |             |             |             |
|----|-------------|-------------|-------------|
| C  | 4.94687500  | -2.24530900 | 0.03094800  |
| C  | 5.27712800  | 0.01870400  | -0.71981700 |
| C  | 6.32028000  | -2.46245600 | 0.01058000  |
| H  | 4.27104600  | -3.03399800 | 0.35110100  |
| C  | 6.65089300  | -0.19873500 | -0.74382900 |
| H  | 4.89358200  | 1.00340900  | -0.97324700 |
| C  | 7.17909700  | -1.43833200 | -0.38417000 |
| H  | 6.71806700  | -3.42859900 | 0.30745000  |
| H  | 7.31531500  | 0.60876900  | -1.03430600 |
| H  | 8.25203400  | -1.59904200 | -0.39971400 |
| C  | -4.56493100 | 1.25433800  | -1.32394200 |
| C  | -3.39259000 | 0.57080300  | -0.99730900 |
| C  | -3.01865700 | 0.33486100  | 0.31289600  |
| C  | -3.87590800 | 0.79165700  | 1.30816600  |
| C  | -5.03436200 | 1.50602200  | 1.01861700  |
| C  | -5.38011300 | 1.74839700  | -0.31362700 |
| C  | -4.75939300 | 1.26262000  | -2.82479100 |
| C  | -3.86223300 | 0.10474300  | -3.28515500 |
| C  | -2.69900800 | 0.13601200  | -2.26639300 |
| H  | -2.14987600 | -0.26414400 | 0.56071700  |
| H  | -5.67798200 | 1.83770000  | 1.82532800  |
| H  | -6.30005100 | 2.27559100  | -0.54506600 |
| H  | -5.79353200 | 1.09227100  | -3.13072400 |
| H  | -3.51027400 | 0.19400300  | -4.32112100 |
| H  | -1.94593100 | 0.86984200  | -2.57262900 |
| H  | -4.41883700 | 2.20392900  | -3.27021700 |
| Br | -3.47920400 | 0.34226900  | 3.09981500  |
| O  | -4.61188800 | -1.08238800 | -3.10964000 |
| C  | -3.91188600 | -2.26940200 | -3.41313800 |
| H  | -4.53422800 | -3.10146500 | -3.08941000 |
| H  | -3.71822700 | -2.34361400 | -4.49278600 |
| N  | -2.04733500 | -1.16366800 | -2.19524800 |
| C  | -0.84606000 | -1.46028200 | -1.65492600 |
| C  | -2.60500300 | -2.31442900 | -2.68113900 |
| N  | -1.80241700 | -3.32436300 | -2.50460100 |
| N  | -0.72833700 | -2.77018400 | -1.86210300 |
| C  | 0.45332900  | -3.53290200 | -1.56988800 |
| C  | 0.41120100  | -4.52583400 | -0.58300800 |
| C  | 1.61442200  | -3.22717200 | -2.28984600 |
| C  | 1.61184900  | -5.16714100 | -0.27625900 |
| C  | 2.78209200  | -3.91114000 | -1.95283700 |
| C  | 2.80293100  | -4.87050900 | -0.94102000 |
| H  | 1.60963500  | -5.92827100 | 0.50107500  |
| H  | 3.69947900  | -3.67818300 | -2.48780600 |

|    |             |             |             |
|----|-------------|-------------|-------------|
| C  | 4.07934000  | -5.58675300 | -0.58069600 |
| H  | 4.25635600  | -5.55163200 | 0.49917300  |
| H  | 4.02920500  | -6.64130400 | -0.86780000 |
| H  | 4.93837900  | -5.13637300 | -1.08329200 |
| C  | 1.63003200  | -2.19917300 | -3.39173500 |
| H  | 0.70591400  | -2.21586200 | -3.97552800 |
| H  | 1.76097100  | -1.19228100 | -2.98016200 |
| H  | 2.46756700  | -2.38736200 | -4.06577300 |
| C  | -0.87086800 | -4.93703700 | 0.08768300  |
| H  | -1.57243400 | -4.11177100 | 0.20376200  |
| H  | -1.37133300 | -5.70332400 | -0.51407900 |
| H  | -0.65952600 | -5.37167200 | 1.06792000  |
| H  | 0.27529800  | 0.67149500  | -2.41589000 |
| B  | -4.07278700 | -2.87611200 | 0.43122700  |
| F  | -4.02287400 | -4.20930200 | 0.84012800  |
| F  | -4.76724000 | -2.76722800 | -0.78010800 |
| F  | -2.74440100 | -2.42056800 | 0.22120600  |
| F  | -4.67001600 | -2.08648700 | 1.41218500  |
| M2 |             |             |             |
| C  | -5.78078600 | -1.14901500 | -0.44438500 |
| C  | -4.50318100 | -0.60709700 | -0.57463600 |
| C  | -4.20686900 | 0.33515600  | -1.54755800 |
| C  | -5.25894300 | 0.78041200  | -2.33841900 |
| C  | -6.55067400 | 0.27456400  | -2.22052700 |
| C  | -6.81023700 | -0.71817100 | -1.27365600 |
| C  | -5.78525100 | -2.18987300 | 0.65131000  |
| C  | -4.56644600 | -1.79811500 | 1.49429000  |
| C  | -3.57028000 | -1.18915300 | 0.46752800  |
| H  | -3.18655400 | 0.66596800  | -1.69508800 |
| H  | -7.34129800 | 0.65010800  | -2.86003600 |
| H  | -7.81147600 | -1.12795800 | -1.18203800 |
| H  | -6.68960700 | -2.19414800 | 1.26394300  |
| H  | -4.12007200 | -2.63571500 | 2.04508300  |
| H  | -2.93521400 | -1.96283300 | 0.02934700  |
| H  | -5.64980500 | -3.19359600 | 0.23251000  |
| Br | -4.89913600 | 2.14311000  | -3.61766900 |
| O  | -5.03587900 | -0.81984300 | 2.41311800  |
| C  | -3.99722300 | -0.27745800 | 3.19792600  |
| H  | -4.42979200 | 0.44949500  | 3.88573000  |
| H  | -3.48817200 | -1.06455900 | 3.77845900  |
| N  | -2.70512400 | -0.19948000 | 1.10201800  |
| C  | -1.63416200 | 0.51971600  | 0.54570800  |
| C  | -2.99425300 | 0.37442800  | 2.30821900  |

|   |             |             |             |
|---|-------------|-------------|-------------|
| N | -2.27577800 | 1.40654000  | 2.58173000  |
| N | -1.43048300 | 1.54825200  | 1.47821800  |
| C | -0.88755500 | 2.84235200  | 1.26832100  |
| C | 0.05531500  | 3.30275900  | 2.20769100  |
| C | -1.25260700 | 3.62840900  | 0.16683600  |
| C | 0.63916700  | 4.54986500  | 2.01340100  |
| C | -0.61992100 | 4.86481300  | 0.00493200  |
| C | 0.32874800  | 5.34125600  | 0.90480000  |
| H | 1.37497000  | 4.90323400  | 2.73312100  |
| H | -0.89480600 | 5.47773000  | -0.85090900 |
| C | 1.02524400  | 6.65898400  | 0.68218200  |
| H | 2.03451300  | 6.50006200  | 0.28778900  |
| H | 0.48171800  | 7.27820600  | -0.03489400 |
| H | 1.12356900  | 7.21873200  | 1.61612700  |
| C | -2.29695000 | 3.19795700  | -0.82688100 |
| H | -1.86636500 | 2.53248300  | -1.58381200 |
| H | -3.10851600 | 2.64765800  | -0.34191700 |
| H | -2.72009000 | 4.06875000  | -1.33302700 |
| C | 0.46221700  | 2.43571900  | 3.36791700  |
| H | -0.35445100 | 2.32204500  | 4.08686000  |
| H | 0.69985700  | 1.42147600  | 3.02716600  |
| H | 1.33119500  | 2.85795700  | 3.87733700  |
| C | 1.25755200  | 1.35842200  | -0.19629600 |
| C | 0.30594700  | 0.74777400  | -0.97231800 |
| H | 1.07610600  | 1.47942200  | 0.86586500  |
| C | -0.96530700 | 0.15526200  | -0.62655200 |
| H | 2.33906200  | -0.49044600 | -0.63120900 |
| O | -1.49017600 | -0.74714400 | -1.43219700 |
| C | 2.54508100  | 1.86228300  | -0.65277400 |
| C | 3.38086600  | 2.52903200  | 0.26799800  |
| C | 3.04746600  | 1.67493400  | -1.95965100 |
| C | 4.64631400  | 2.97339300  | -0.08917200 |
| H | 3.00884600  | 2.69510200  | 1.27735500  |
| C | 4.31815000  | 2.11692700  | -2.31029400 |
| H | 2.43539000  | 1.18274900  | -2.71058700 |
| C | 5.12989800  | 2.76713800  | -1.38148700 |
| H | 5.26590700  | 3.47707800  | 0.64783500  |
| H | 4.67944000  | 1.95015600  | -3.32164100 |
| H | 6.12447800  | 3.10190600  | -1.65830300 |
| C | -0.94085900 | -3.86422900 | 0.05847900  |
| C | 0.00009700  | -2.83504900 | 0.06186200  |
| C | 0.19754000  | -2.02697500 | 1.17243700  |
| C | -0.56877800 | -2.30918300 | 2.30116100  |
| C | -1.47922700 | -3.35987500 | 2.34188600  |



|    |             |             |             |
|----|-------------|-------------|-------------|
| C  | -1.67758200 | -4.14280000 | 1.20235400  |
| C  | -1.03320700 | -4.48320000 | -1.31555500 |
| C  | 0.29677000  | -4.08901900 | -1.95943100 |
| C  | 0.62191600  | -2.72121800 | -1.31132800 |
| H  | 0.89328200  | -1.19207300 | 1.17589100  |
| H  | -2.03592000 | -3.55562000 | 3.25204800  |
| H  | -2.40319500 | -4.95034000 | 1.21803200  |
| H  | -1.15853400 | -5.56799400 | -1.31764800 |
| H  | 0.26788500  | -4.03578200 | -3.05412900 |
| H  | 0.13275700  | -1.88416900 | -1.83352900 |
| H  | -1.86096900 | -4.03155500 | -1.87329600 |
| Br | -0.39560800 | -1.18349300 | 3.81437400  |
| O  | 1.24515900  | -5.06922500 | -1.54602800 |
| C  | 2.53871500  | -4.83932800 | -2.05017400 |
| H  | 3.19780000  | -5.62039700 | -1.67060200 |
| H  | 2.55203300  | -4.86347100 | -3.14879500 |
| N  | 2.08098200  | -2.53085700 | -1.29035000 |
| C  | 2.76668700  | -1.44262700 | -0.93242600 |
| C  | 3.00600800  | -3.49789500 | -1.57785300 |
| N  | 4.21935300  | -3.05526000 | -1.39803100 |
| N  | 4.04925500  | -1.76497500 | -0.99260100 |
| C  | 5.16784300  | -0.94602300 | -0.61209000 |
| C  | 5.21982700  | -0.45430500 | 0.69583500  |
| C  | 6.15638100  | -0.69794400 | -1.56923500 |
| C  | 6.34095600  | 0.29939600  | 1.04097500  |
| C  | 7.25450500  | 0.05617400  | -1.16648900 |
| C  | 7.36170700  | 0.56356100  | 0.12944300  |
| H  | 6.40966600  | 0.69740500  | 2.05020400  |
| H  | 8.03534600  | 0.27101700  | -1.89157800 |
| C  | 8.52514500  | 1.43646400  | 0.51746700  |
| H  | 9.41668900  | 1.19448100  | -0.06477500 |
| H  | 8.28197900  | 2.48856400  | 0.33170900  |
| H  | 8.76202800  | 1.33485700  | 1.57875300  |
| C  | 6.01830800  | -1.18457400 | -2.98676600 |
| H  | 6.15029400  | -2.26717600 | -3.05547300 |
| H  | 5.02352200  | -0.94792800 | -3.37910800 |
| H  | 6.76148700  | -0.70237100 | -3.62336600 |
| C  | 4.12204700  | -0.69532600 | 1.70028200  |
| H  | 3.27244300  | -0.02410800 | 1.51665600  |
| H  | 3.75377400  | -1.72542800 | 1.67202200  |
| H  | 4.48587300  | -0.49297600 | 2.70856800  |
| H  | 0.54196800  | 0.56535400  | -2.02509100 |

M2<sup>H</sup>

|    |             |             |             |
|----|-------------|-------------|-------------|
| C  | -4.62819100 | 0.34005800  | -0.74930800 |
| C  | -3.23473500 | 0.27062900  | -0.73828500 |
| C  | -2.46901500 | 1.17417800  | -0.01849200 |
| C  | -3.14392300 | 2.13791300  | 0.72305700  |
| C  | -4.53189800 | 2.23570700  | 0.72480200  |
| C  | -5.28271300 | 1.33045700  | -0.02780600 |
| C  | -5.19344800 | -0.78220900 | -1.59005000 |
| C  | -4.04510700 | -1.79750000 | -1.60140300 |
| C  | -2.77332800 | -0.90995500 | -1.56892300 |
| H  | -1.38708400 | 1.13152000  | -0.01810900 |
| H  | -5.02031700 | 3.00156100  | 1.31615700  |
| H  | -6.36636400 | 1.39306200  | -0.02219600 |
| H  | -6.09962700 | -1.23154900 | -1.17838200 |
| H  | -4.05276800 | -2.47483100 | -2.46504700 |
| H  | -2.51767900 | -0.59433600 | -2.58256300 |
| H  | -5.40925000 | -0.44198200 | -2.60882500 |
| Br | -2.11454300 | 3.33149700  | 1.78221900  |
| O  | -4.16859800 | -2.54150400 | -0.39871800 |
| C  | -3.12022700 | -3.47069200 | -0.22909700 |
| H  | -3.27713300 | -3.99414000 | 0.71403600  |
| H  | -3.11751100 | -4.20402800 | -1.04891000 |
| N  | -1.64083900 | -1.63855700 | -1.00283600 |
| C  | -0.32542500 | -1.20866000 | -0.82935400 |
| C  | -1.81313900 | -2.74618400 | -0.20114100 |
| N  | -0.75756600 | -3.05969500 | 0.46343800  |
| N  | 0.18404600  | -2.10725200 | 0.09346800  |
| C  | 1.36414800  | -1.96135200 | 0.87778300  |
| C  | 2.40631300  | -2.87333200 | 0.67504400  |
| C  | 1.46797700  | -0.90301900 | 1.79167000  |
| C  | 3.58585300  | -2.69599600 | 1.39703900  |
| C  | 2.67102900  | -0.75914500 | 2.48196700  |
| C  | 3.74041800  | -1.63688100 | 2.29359900  |
| H  | 4.40678200  | -3.39245900 | 1.24524500  |
| H  | 2.77432100  | 0.06181300  | 3.18802800  |
| C  | 5.04005400  | -1.42169800 | 3.02544800  |
| H  | 5.59431900  | -0.58635300 | 2.58495800  |
| H  | 4.86476500  | -1.17787400 | 4.07634400  |
| H  | 5.67470300  | -2.30876100 | 2.97708800  |
| C  | 0.35114100  | 0.08594800  | 1.99382300  |
| H  | 0.43999400  | 0.91233900  | 1.27842400  |
| H  | -0.63038700 | -0.37507600 | 1.85034500  |
| H  | 0.39251300  | 0.51031100  | 2.99898500  |
| C  | 2.25170100  | -3.98648500 | -0.32574200 |
| H  | 1.42264000  | -4.64561000 | -0.05364800 |

|   |             |             |             |
|---|-------------|-------------|-------------|
| H | 2.02584200  | -3.58113400 | -1.31749200 |
| H | 3.16579900  | -4.57867900 | -0.39112600 |
| C | 2.28009600  | 1.28069800  | -1.80118900 |
| C | 1.69053200  | 0.16562400  | -1.31214400 |
| H | 1.67422500  | 2.01330200  | -2.33014500 |
| C | 0.30460900  | -0.16297500 | -1.45816100 |
| H | -0.13490200 | 0.66493400  | -3.13630900 |
| O | -0.49602500 | 0.67065700  | -2.23858700 |
| C | 3.70277800  | 1.59675900  | -1.66319400 |
| C | 4.24098600  | 2.67654600  | -2.38217500 |
| C | 4.57193800  | 0.87511200  | -0.82311200 |
| C | 5.58707100  | 3.01364400  | -2.28474300 |
| H | 3.58574000  | 3.25393900  | -3.02941500 |
| C | 5.91700400  | 1.20934400  | -0.73041200 |
| H | 4.19018300  | 0.05410700  | -0.22074800 |
| C | 6.43660600  | 2.27909200  | -1.46086700 |
| H | 5.97329100  | 3.85279100  | -2.85539500 |
| H | 6.56559600  | 0.63497700  | -0.07542000 |
| H | 7.48714600  | 2.53881500  | -1.38221700 |
| H | 2.30703400  | -0.56749200 | -0.80320200 |

M2<sup>NH</sup>

|    |             |             |             |
|----|-------------|-------------|-------------|
| C  | -5.00080200 | 0.83559700  | -0.66075600 |
| C  | -3.67102800 | 0.46656400  | -0.46296800 |
| C  | -3.32550400 | -0.61458000 | 0.32630100  |
| C  | -4.35461100 | -1.33445200 | 0.92108100  |
| C  | -5.69088600 | -0.98418900 | 0.75110500  |
| C  | -6.01726200 | 0.11426000  | -0.04672000 |
| C  | -5.07578400 | 2.02930300  | -1.58519700 |
| C  | -3.72052300 | 1.98298200  | -2.30000000 |
| C  | -2.76672500 | 1.41099300  | -1.22065000 |
| H  | -2.29441200 | -0.89559800 | 0.48209800  |
| H  | -6.46847400 | -1.56861400 | 1.22908500  |
| H  | -7.05833300 | 0.38341100  | -0.19303300 |
| H  | -5.89054900 | 1.97848300  | -2.31018400 |
| H  | -3.38154300 | 2.95175400  | -2.68691800 |
| H  | -2.38199700 | 2.19772900  | -0.57163700 |
| H  | -5.17471600 | 2.96203800  | -1.01994100 |
| Br | -3.89260000 | -2.83381100 | 1.98761800  |
| O  | -3.86446500 | 1.05151100  | -3.36166600 |
| C  | -2.68055500 | 0.88678800  | -4.10224900 |
| H  | -2.85492700 | 0.12313900  | -4.86057800 |
| H  | -2.38828700 | 1.82175100  | -4.60037800 |
| N  | -1.60564300 | 0.75433700  | -1.85205200 |

|   |             |             |             |
|---|-------------|-------------|-------------|
| C | -0.45198300 | 0.29362000  | -1.32172600 |
| C | -1.57328600 | 0.45316000  | -3.19172600 |
| N | -0.47536400 | -0.16453600 | -3.51168000 |
| N | 0.20892100  | -0.25504700 | -2.33938700 |
| C | 1.51186900  | -0.86549500 | -2.28143600 |
| C | 2.62447100  | -0.02929500 | -2.31677200 |
| C | 1.58001100  | -2.25374800 | -2.12558400 |
| C | 3.87022800  | -0.62814300 | -2.11217100 |
| C | 2.84436700  | -2.80371800 | -1.95626800 |
| C | 3.99311300  | -2.00337700 | -1.92304100 |
| H | 4.74442400  | 0.01318200  | -2.06002800 |
| H | 2.93526200  | -3.87648200 | -1.80304800 |
| C | 5.33910900  | -2.63636500 | -1.68583100 |
| H | 5.27975300  | -3.37808000 | -0.88365100 |
| H | 5.68976700  | -3.15293600 | -2.58487900 |
| H | 6.08492700  | -1.88733900 | -1.41315400 |
| C | 0.33198500  | -3.09013200 | -2.06975500 |
| H | -0.26394500 | -2.82780000 | -1.18669200 |
| H | -0.29650400 | -2.93256200 | -2.95088900 |
| H | 0.58287800  | -4.14967700 | -2.00469800 |
| C | 2.49029000  | 1.44587200  | -2.57784200 |
| H | 2.00933200  | 1.62000100  | -3.54572100 |
| H | 1.90418900  | 1.94769000  | -1.80333700 |
| H | 3.47259500  | 1.91676500  | -2.56947700 |
| C | 1.57935400  | -1.40924800 | 0.85828300  |
| C | 0.33680100  | -0.94054100 | 0.71165000  |
| H | 2.40814000  | -0.76709600 | 0.55389700  |
| H | -0.53006200 | -1.51384600 | 1.03348900  |
| C | 0.05805500  | 0.41982200  | 0.11134100  |
| H | 1.02385600  | 0.94659400  | 0.03107000  |
| O | -0.89055900 | 1.13777200  | 0.83521200  |
| C | 1.95497200  | -2.74042500 | 1.35830100  |
| C | 3.31805700  | -3.04487500 | 1.46755700  |
| C | 1.01696200  | -3.72930100 | 1.68733100  |
| C | 3.73855000  | -4.29993100 | 1.89583900  |
| H | 4.04875200  | -2.28384100 | 1.20428900  |
| C | 1.43679600  | -4.98309600 | 2.11653800  |
| H | -0.04733400 | -3.52585700 | 1.60571300  |
| C | 2.79719100  | -5.27400100 | 2.22114400  |
| H | 4.79916000  | -4.51681400 | 1.97425900  |
| H | 0.69990600  | -5.73939200 | 2.36693700  |
| H | 3.11965100  | -6.25563400 | 2.55256600  |
| N | 0.11198800  | 3.13398300  | 2.16579100  |
| C | 0.77917900  | 2.71967500  | 3.40900400  |

|   |             |            |             |
|---|-------------|------------|-------------|
| C | 1.84370500  | 1.66142300 | 3.15549700  |
| H | 0.00180900  | 2.31158000 | 4.06413200  |
| H | 1.21758400  | 3.58222400 | 3.93052500  |
| H | 2.27763400  | 1.34379900 | 4.10742100  |
| H | 1.40034000  | 0.78323900 | 2.67557800  |
| H | 2.65109500  | 2.02285600 | 2.51456000  |
| C | -1.15031000 | 3.85257900 | 2.40146500  |
| C | -1.05788200 | 5.24265800 | 3.02766900  |
| H | -1.76406000 | 3.20296500 | 3.03555800  |
| H | -1.66314600 | 3.92264100 | 1.43450000  |
| H | -2.06264200 | 5.60335900 | 3.26327200  |
| H | -0.48057400 | 5.22835000 | 3.95634900  |
| H | -0.59804700 | 5.96025400 | 2.34440500  |
| C | 1.01126000  | 3.78973000 | 1.18801700  |
| C | 2.01188100  | 4.80743100 | 1.73488800  |
| H | 0.36401100  | 4.25762600 | 0.43708400  |
| H | 1.58478300  | 3.01234000 | 0.67692900  |
| H | 2.52332800  | 5.26935400 | 0.88872200  |
| H | 1.54215500  | 5.58748900 | 2.33757500  |
| H | 2.78310600  | 4.31255400 | 2.33008800  |
| H | -0.42904500 | 1.87272100 | 1.39944500  |
| B | 4.10812700  | 2.37652400 | 0.08830800  |
| F | 3.52532300  | 3.47923600 | -0.54784300 |
| F | 3.12093100  | 1.36735400 | 0.24751400  |
| F | 4.57797300  | 2.74248000 | 1.35059100  |
| F | 5.14855400  | 1.87268000 | -0.69809000 |

M2<sup>NHCH</sup>

|   |            |            |             |
|---|------------|------------|-------------|
| C | 3.03631100 | 3.66101200 | 0.35726100  |
| C | 1.85080300 | 2.93346500 | 0.49989800  |
| C | 1.71208500 | 1.97948800 | 1.49890800  |
| C | 2.80138900 | 1.77202600 | 2.34088200  |
| C | 4.00100200 | 2.45981400 | 2.19673800  |
| C | 4.11772200 | 3.41840500 | 1.19303300  |
| C | 2.94744800 | 4.63772800 | -0.78795600 |
| C | 1.44908400 | 4.69088000 | -1.07595600 |
| C | 0.93110000 | 3.29251600 | -0.65231300 |
| H | 0.81103400 | 1.38839000 | 1.60185600  |
| H | 4.82901400 | 2.24745600 | 2.86305400  |
| H | 5.04535800 | 3.96907000 | 1.07316300  |
| H | 3.31826400 | 5.63521800 | -0.54183200 |
| H | 1.19914000 | 4.92754100 | -2.11755900 |
| H | 1.06776600 | 2.56438900 | -1.45566500 |
| H | 3.49657000 | 4.26389600 | -1.65588300 |

|    |             |             |             |
|----|-------------|-------------|-------------|
| Br | 2.66189100  | 0.49218800  | 3.73682600  |
| O  | 0.90848500  | 5.67562500  | -0.20538900 |
| C  | -0.45878300 | 5.89431900  | -0.43013400 |
| H  | -0.82790700 | 6.57358000  | 0.33960300  |
| H  | -0.63795400 | 6.34585500  | -1.41590800 |
| N  | -0.53123300 | 3.38690200  | -0.40167200 |
| C  | -1.48758900 | 2.43533400  | -0.39344600 |
| C  | -1.19649900 | 4.59269000  | -0.35662700 |
| N  | -2.48622900 | 4.42878000  | -0.32371400 |
| N  | -2.64917000 | 3.07889600  | -0.35182200 |
| C  | -3.95668800 | 2.47806200  | -0.41324100 |
| C  | -4.40859500 | 2.00311300  | -1.64436700 |
| C  | -4.68418900 | 2.36108200  | 0.77730400  |
| C  | -5.64924800 | 1.35741900  | -1.65706000 |
| C  | -5.91314400 | 1.71731600  | 0.70704200  |
| C  | -6.40803800 | 1.20494200  | -0.49871900 |
| H  | -6.03211900 | 0.98128500  | -2.60232200 |
| H  | -6.49681000 | 1.59844900  | 1.61643900  |
| C  | -7.74661600 | 0.51482100  | -0.52653700 |
| H  | -7.74392800 | -0.36724400 | 0.12304200  |
| H  | -8.53197800 | 1.18135500  | -0.15956600 |
| H  | -8.01109600 | 0.19728800  | -1.53700700 |
| C  | -4.12322700 | 2.86094900  | 2.07905200  |
| H  | -4.85192400 | 2.74005100  | 2.88128200  |
| H  | -3.22416200 | 2.29297500  | 2.34554000  |
| H  | -3.84370300 | 3.91591700  | 2.01542700  |
| C  | -3.61187900 | 2.15883800  | -2.91401800 |
| H  | -3.01541200 | 3.07420800  | -2.91276100 |
| H  | -2.93230800 | 1.31187500  | -3.06608100 |
| H  | -4.28260500 | 2.19132000  | -3.77411400 |
| C  | -3.08760700 | -0.39015800 | 0.77089700  |
| C  | -1.96075400 | 0.32372800  | 0.81980900  |
| H  | -3.59176900 | -0.49454900 | -0.19327100 |
| H  | -1.41125300 | 0.48495900  | 1.74605000  |
| C  | -1.34996000 | 0.93188100  | -0.42387400 |
| H  | -1.94652800 | 0.58783300  | -1.28795500 |
| O  | -0.00131100 | 0.64432000  | -0.56195500 |
| C  | -3.75306700 | -1.05546800 | 1.89970800  |
| C  | -5.07412400 | -1.49020100 | 1.73421000  |
| C  | -3.11220000 | -1.29721900 | 3.12202300  |
| C  | -5.74628800 | -2.14023800 | 2.76414800  |
| H  | -5.56545800 | -1.31335100 | 0.78016500  |
| C  | -3.78211300 | -1.94811400 | 4.15171500  |
| H  | -2.07708600 | -0.99747900 | 3.25908300  |

|    |             |             |             |
|----|-------------|-------------|-------------|
| C  | -5.10019900 | -2.37079400 | 3.97711200  |
| H  | -6.77008500 | -2.47009500 | 2.61927000  |
| H  | -3.27234500 | -2.13593600 | 5.09103400  |
| H  | -5.61769800 | -2.88334200 | 4.78130800  |
| C  | 4.53041800  | -1.36654800 | 1.21666700  |
| C  | 3.28581500  | -1.19100200 | 0.61655900  |
| C  | 3.08883300  | -0.30633600 | -0.42857300 |
| C  | 4.18862300  | 0.42897900  | -0.84188700 |
| C  | 5.43996600  | 0.30841400  | -0.24698600 |
| C  | 5.61490200  | -0.60629000 | 0.79349100  |
| C  | 4.45020500  | -2.43925600 | 2.28165200  |
| C  | 3.12559400  | -3.15453400 | 1.97027400  |
| C  | 2.26673200  | -2.05493800 | 1.31132500  |
| H  | 2.13940800  | -0.21632500 | -0.94067700 |
| H  | 6.27087500  | 0.90482800  | -0.60651900 |
| H  | 6.59467100  | -0.72878700 | 1.24472600  |
| H  | 5.28464600  | -3.14396200 | 2.26103600  |
| H  | 2.63967000  | -3.58018400 | 2.85907800  |
| H  | 1.75423500  | -1.47178800 | 2.08374400  |
| H  | 4.40006900  | -1.98681900 | 3.27856000  |
| Br | 3.94990300  | 1.60045300  | -2.31790000 |
| O  | 3.39036000  | -4.17652400 | 1.02472500  |
| C  | 2.23914400  | -4.89907700 | 0.63365200  |
| H  | 2.53831000  | -5.56848100 | -0.17043300 |
| H  | 1.84295700  | -5.48129300 | 1.47851700  |
| N  | 1.25076800  | -2.63603800 | 0.46102800  |
| C  | 0.20737800  | -1.96836400 | -0.07983100 |
| C  | 1.18295400  | -3.95920500 | 0.13326100  |
| N  | 0.10771600  | -4.20138600 | -0.55808900 |
| N  | -0.46940900 | -2.95672900 | -0.67738000 |
| C  | -1.78341600 | -2.79953700 | -1.22650400 |
| C  | -1.96558200 | -2.02578300 | -2.37618500 |
| C  | -2.85728700 | -3.36233700 | -0.52159300 |
| C  | -3.27986200 | -1.81590900 | -2.81077100 |
| C  | -4.14189700 | -3.15309900 | -1.01565800 |
| C  | -4.37439900 | -2.37302200 | -2.15138300 |
| H  | -3.44394100 | -1.21840500 | -3.70503400 |
| H  | -4.98558400 | -3.58008400 | -0.47787200 |
| C  | -5.78306300 | -2.13860100 | -2.63164100 |
| H  | -6.38511100 | -1.66664000 | -1.84738900 |
| H  | -5.80134200 | -1.49095100 | -3.51099200 |
| H  | -6.27118700 | -3.08208900 | -2.89236800 |
| C  | -2.63742300 | -4.11175500 | 0.76535100  |
| H  | -2.20065900 | -5.09759000 | 0.58548100  |

|     |             |             |             |
|-----|-------------|-------------|-------------|
| H   | -1.94770300 | -3.56009700 | 1.41335200  |
| H   | -3.58312700 | -4.23078200 | 1.29908900  |
| C   | -0.80314700 | -1.42898000 | -3.12486400 |
| H   | -0.40194200 | -0.55208100 | -2.60411600 |
| H   | 0.02666200  | -2.13301100 | -3.20161900 |
| H   | -1.12037600 | -1.12172000 | -4.12375500 |
| H   | 0.09227200  | -0.37521300 | -0.32153300 |
| B   | 3.12601900  | -3.02230800 | -2.67473200 |
| F   | 2.98111600  | -3.33598600 | -4.03030100 |
| F   | 3.21602700  | -4.20712700 | -1.92546800 |
| F   | 1.98978100  | -2.30172300 | -2.24934900 |
| F   | 4.26976300  | -2.24776700 | -2.48321300 |
| TS3 |             |             |             |
| C   | -5.69422500 | -0.87113500 | 0.29206600  |
| C   | -4.53780500 | -0.20938600 | -0.12629900 |
| C   | -4.49861400 | 0.50698500  | -1.31267300 |
| C   | -5.67160400 | 0.55812600  | -2.05923800 |
| C   | -6.83879200 | -0.09132600 | -1.66740400 |
| C   | -6.84794300 | -0.82199000 | -0.47925000 |
| C   | -5.45250200 | -1.56251000 | 1.61489800  |
| C   | -4.25395900 | -0.78768400 | 2.15977900  |
| C   | -3.43550200 | -0.45145700 | 0.88949500  |
| H   | -3.57010500 | 0.95046300  | -1.65309500 |
| H   | -7.72862800 | -0.02405000 | -2.28277300 |
| H   | -7.75372600 | -1.32947100 | -0.16234500 |
| H   | -6.29743300 | -1.51225700 | 2.30470600  |
| H   | -3.66080500 | -1.31907000 | 2.91245700  |
| H   | -2.80554400 | -1.28569500 | 0.57082800  |
| H   | -5.18359000 | -2.61534200 | 1.46901500  |
| Br  | -5.67481000 | 1.54373400  | -3.68624400 |
| O   | -4.78427000 | 0.40838800  | 2.71957300  |
| C   | -3.78724100 | 1.23862500  | 3.26215500  |
| H   | -4.25760900 | 2.16313600  | 3.59868300  |
| H   | -3.29231900 | 0.75336300  | 4.11668900  |
| N   | -2.55556900 | 0.68574500  | 1.16785000  |
| C   | -1.42518000 | 1.09014900  | 0.51663900  |
| C   | -2.74161100 | 1.52678200  | 2.23106200  |
| N   | -1.85301100 | 2.46888500  | 2.26079300  |
| N   | -1.05147900 | 2.21174200  | 1.17764100  |
| C   | -0.06887900 | 3.18350800  | 0.80917200  |
| C   | 0.97434500  | 3.43742300  | 1.70800900  |
| C   | -0.18011300 | 3.83871600  | -0.42061100 |
| C   | 1.95328800  | 4.34713400  | 1.32114800  |



|   |             |             |             |
|---|-------------|-------------|-------------|
| C | 0.83672900  | 4.73059600  | -0.76438800 |
| C | 1.91960700  | 4.97734400  | 0.07703100  |
| H | 2.78794700  | 4.53560900  | 1.99238700  |
| H | 0.77997300  | 5.23864100  | -1.72430100 |
| C | 3.06247200  | 5.85297500  | -0.36306900 |
| H | 2.76056400  | 6.53436400  | -1.16157700 |
| H | 3.45700300  | 6.44256300  | 0.46838100  |
| H | 3.87748600  | 5.22557000  | -0.74251100 |
| C | -1.33005400 | 3.60874600  | -1.36535100 |
| H | -1.11878600 | 2.76642800  | -2.03142900 |
| H | -2.25681500 | 3.38044600  | -0.83085300 |
| H | -1.49746500 | 4.49910700  | -1.97489400 |
| C | 1.06034800  | 2.74081200  | 3.04027400  |
| H | 0.43142600  | 3.24004600  | 3.78383500  |
| H | 0.71473300  | 1.70485600  | 2.98071700  |
| H | 2.09079800  | 2.74706400  | 3.40224700  |
| C | 1.57662000  | 0.83450400  | -0.06978100 |
| C | 0.46447800  | 0.57806100  | -0.95340100 |
| H | 1.36949200  | 0.93211300  | 0.99601100  |
| C | -0.88309800 | 0.42925100  | -0.68232700 |
| H | 2.10256400  | -0.53685800 | -0.37376600 |
| O | -1.73451000 | -0.26374500 | -1.37663300 |
| C | 2.78354200  | 1.50479200  | -0.53074400 |
| C | 3.83408300  | 1.78928900  | 0.37161500  |
| C | 3.02337800  | 1.79043400  | -1.89102000 |
| C | 5.03593800  | 2.32996200  | -0.05350300 |
| H | 3.68127900  | 1.57441000  | 1.42895000  |
| C | 4.24039900  | 2.32256200  | -2.31787200 |
| H | 2.22885200  | 1.63624600  | -2.61496600 |
| C | 5.25697100  | 2.60048100  | -1.40935300 |
| H | 5.81732200  | 2.53430800  | 0.67464200  |
| H | 4.38553700  | 2.53347500  | -3.37460000 |
| H | 6.20362700  | 3.01449800  | -1.74289700 |
| C | -1.42580900 | -3.70496200 | 0.23513000  |
| C | -0.39875200 | -2.76371800 | 0.15949300  |
| C | -0.10505400 | -1.91921200 | 1.22165100  |
| C | -0.86716400 | -2.06822400 | 2.37615700  |
| C | -1.82996100 | -3.06480900 | 2.51445000  |
| C | -2.12483800 | -3.88433700 | 1.42359900  |
| C | -1.62821600 | -4.36525000 | -1.10711200 |
| C | -0.29885700 | -4.11213600 | -1.82169300 |
| C | 0.19979100  | -2.76588800 | -1.22965700 |
| H | 0.66092700  | -1.15258400 | 1.15752900  |
| H | -2.36427200 | -3.17855700 | 3.45132800  |

|                  |             |             |             |
|------------------|-------------|-------------|-------------|
| H                | -2.89751200 | -4.64206700 | 1.50866400  |
| H                | -1.84108600 | -5.43505300 | -1.05717600 |
| H                | -0.38105400 | -4.07551100 | -2.91472100 |
| H                | -0.20228500 | -1.90507300 | -1.78198300 |
| H                | -2.44458500 | -3.87193800 | -1.64552000 |
| Br               | -0.65361300 | -0.78421700 | 3.75926300  |
| O                | 0.56113300  | -5.17790400 | -1.43687400 |
| C                | 1.84619800  | -5.07858000 | -2.00771500 |
| H                | 2.43846600  | -5.92594100 | -1.66145600 |
| H                | 1.79465500  | -5.10489500 | -3.10536200 |
| N                | 1.66652300  | -2.72502300 | -1.24708600 |
| C                | 2.46346100  | -1.69099700 | -0.89583800 |
| C                | 2.46697900  | -3.79437900 | -1.55963000 |
| N                | 3.72440400  | -3.49549200 | -1.41476400 |
| N                | 3.69248700  | -2.18787400 | -0.99941900 |
| C                | 4.90348400  | -1.50984800 | -0.63046700 |
| C                | 5.18331100  | -1.35473000 | 0.72767300  |
| C                | 5.73958200  | -1.03588100 | -1.64313600 |
| C                | 6.38011000  | -0.72351000 | 1.06589300  |
| C                | 6.92252700  | -0.41391900 | -1.25488000 |
| C                | 7.25751500  | -0.25102500 | 0.09085000  |
| H                | 6.62420600  | -0.58852900 | 2.11678000  |
| H                | 7.58936200  | -0.02794800 | -2.02230300 |
| C                | 8.51830300  | 0.47926900  | 0.47261300  |
| H                | 8.77713600  | 0.30835300  | 1.51950800  |
| H                | 9.36132000  | 0.16736000  | -0.14908700 |
| H                | 8.38804700  | 1.55772300  | 0.32981700  |
| C                | 5.34170700  | -1.16589400 | -3.08772100 |
| H                | 5.20038000  | -2.21280500 | -3.37103400 |
| H                | 4.39575900  | -0.64107700 | -3.25945500 |
| H                | 6.10112300  | -0.72684900 | -3.73660900 |
| C                | 4.20570000  | -1.80259100 | 1.78219900  |
| H                | 3.34318700  | -1.12451100 | 1.81164000  |
| H                | 3.82658200  | -2.80965800 | 1.58457300  |
| H                | 4.67387900  | -1.79573500 | 2.76772900  |
| H                | 0.73195000  | 0.19153800  | -1.94522100 |
| TS3 <sup>H</sup> |             |             |             |
| C                | 4.37362600  | -0.05281500 | -1.44896400 |
| C                | 3.08205700  | -0.14487900 | -0.92828600 |
| C                | 2.81511300  | -0.84894700 | 0.23641500  |
| C                | 3.89401400  | -1.45158100 | 0.87645700  |
| C                | 5.19111900  | -1.37936900 | 0.37651600  |
| C                | 5.43349600  | -0.67548700 | -0.80273800 |

|    |             |             |             |
|----|-------------|-------------|-------------|
| C  | 4.37383800  | 0.77869800  | -2.71086800 |
| C  | 3.07655500  | 1.57984100  | -2.57749600 |
| C  | 2.12753100  | 0.60701600  | -1.83523500 |
| H  | 1.80852500  | -0.94699400 | 0.62500500  |
| H  | 6.00202600  | -1.86403600 | 0.90774500  |
| H  | 6.44325500  | -0.60769000 | -1.19484300 |
| H  | 5.23172600  | 1.44835900  | -2.79998300 |
| H  | 2.65796800  | 1.92584100  | -3.53061400 |
| H  | 1.63409600  | -0.07439700 | -2.52955300 |
| H  | 4.33725600  | 0.14356600  | -3.60245100 |
| Br | 3.57976600  | -2.40560100 | 2.48769200  |
| O  | 3.38416300  | 2.68927000  | -1.74363100 |
| C  | 2.27298600  | 3.51760700  | -1.49996700 |
| H  | 2.58005500  | 4.30705500  | -0.81355200 |
| H  | 1.91128300  | 3.97801900  | -2.43056300 |
| N  | 1.08414400  | 1.36412700  | -1.13294900 |
| C  | -0.06667700 | 0.92259500  | -0.55136600 |
| C  | 1.16618600  | 2.71222400  | -0.89338900 |
| N  | 0.16952800  | 3.13682000  | -0.18183500 |
| N  | -0.59038700 | 2.01644700  | 0.03657400  |
| C  | -1.77795300 | 2.09738900  | 0.83219400  |
| C  | -2.94799200 | 2.56210000  | 0.22745800  |
| C  | -1.71464500 | 1.68252900  | 2.16401100  |
| C  | -4.09800300 | 2.60812900  | 1.01212200  |
| C  | -2.89226500 | 1.74401800  | 2.90712400  |
| C  | -4.08701300 | 2.20448200  | 2.35003400  |
| H  | -5.02578700 | 2.95744200  | 0.56646000  |
| H  | -2.87585500 | 1.42091400  | 3.94478100  |
| C  | -5.33882200 | 2.28689000  | 3.18388700  |
| H  | -5.34360800 | 1.52329000  | 3.96449400  |
| H  | -5.40909700 | 3.26321300  | 3.67408600  |
| H  | -6.23186900 | 2.16052300  | 2.56817500  |
| C  | -0.43335000 | 1.14968700  | 2.74535000  |
| H  | 0.41029400  | 1.80869100  | 2.52071400  |
| H  | -0.51485100 | 1.04443100  | 3.82784200  |
| H  | -0.20731700 | 0.16396200  | 2.32249500  |
| C  | -2.95493200 | 2.94625700  | -1.22762500 |
| H  | -2.24450100 | 3.75374400  | -1.42635000 |
| H  | -2.66388900 | 2.09277400  | -1.85041000 |
| H  | -3.94909400 | 3.27226400  | -1.53570600 |
| C  | -2.05871600 | -2.19790300 | -0.65354600 |
| C  | -1.85709300 | -0.80721500 | -0.28573200 |
| H  | -1.54427400 | -2.91470300 | -0.00287100 |
| C  | -0.57094800 | -0.41466000 | -0.58711500 |

|   |             |             |             |
|---|-------------|-------------|-------------|
| H | -0.81941900 | -2.07063000 | -1.37722800 |
| O | 0.18942800  | -1.36098600 | -1.14865800 |
| C | -3.39413800 | -2.64249700 | -1.07400500 |
| C | -3.81002000 | -3.97336600 | -0.88984000 |
| C | -4.29849900 | -1.76864800 | -1.70489500 |
| C | -5.06377700 | -4.40678000 | -1.30510900 |
| H | -3.13143800 | -4.67165100 | -0.40573400 |
| C | -5.55799400 | -2.19830100 | -2.11051500 |
| H | -3.99832500 | -0.73943200 | -1.88671500 |
| C | -5.95192400 | -3.52111800 | -1.91573000 |
| H | -5.35330400 | -5.44156700 | -1.14556900 |
| H | -6.23395600 | -1.49652900 | -2.59101700 |
| H | -6.93209700 | -3.85758100 | -2.23750000 |
| H | -2.65192000 | -0.12623700 | 0.00055200  |

TS3<sup>NHCH</sup>

|    |             |             |             |
|----|-------------|-------------|-------------|
| C  | -6.59568000 | -1.35059700 | -0.55407000 |
| C  | -5.39685000 | -0.64409600 | -0.44674600 |
| C  | -5.14718700 | 0.48756900  | -1.20853900 |
| C  | -6.14844900 | 0.90149800  | -2.08240700 |
| C  | -7.35011700 | 0.21109500  | -2.21348700 |
| C  | -7.57546700 | -0.92985600 | -1.44365600 |
| C  | -6.60044000 | -2.52638300 | 0.39534900  |
| C  | -5.51820900 | -2.14610200 | 1.40937500  |
| C  | -4.50639100 | -1.33469800 | 0.56329700  |
| H  | -4.21551700 | 1.03825500  | -1.14075400 |
| H  | -8.10384800 | 0.56772000  | -2.90579700 |
| H  | -8.51403800 | -1.46712900 | -1.53420200 |
| H  | -7.55659400 | -2.68749000 | 0.89735400  |
| H  | -5.04975700 | -3.00645400 | 1.90580300  |
| H  | -3.80725300 | -2.00764300 | 0.06544800  |
| H  | -6.32328500 | -3.45220900 | -0.12123500 |
| Br | -5.86022300 | 2.46121900  | -3.12199500 |
| O  | -6.13650100 | -1.30910800 | 2.37329300  |
| C  | -5.23095600 | -0.87330700 | 3.35856000  |
| H  | -5.76077700 | -0.21380600 | 4.04583800  |
| H  | -4.82236100 | -1.72351900 | 3.92347300  |
| N  | -3.72787600 | -0.42867700 | 1.42132200  |
| C  | -2.65077600 | 0.35564500  | 1.12611200  |
| C  | -4.10535100 | -0.13028900 | 2.70872600  |
| N  | -3.35477400 | 0.78640000  | 3.22981100  |
| N  | -2.45044300 | 1.08739100  | 2.24467200  |
| C  | -1.48747700 | 2.12672600  | 2.46566400  |
| C  | -0.27131500 | 1.79403800  | 3.06450600  |

|   |             |             |             |
|---|-------------|-------------|-------------|
| C | -1.79229900 | 3.41449500  | 2.01349600  |
| C | 0.67596700  | 2.80959600  | 3.19673000  |
| C | -0.81034400 | 4.39213000  | 2.15883800  |
| C | 0.42826100  | 4.10681400  | 2.74147400  |
| H | 1.63206500  | 2.58284400  | 3.66298900  |
| H | -1.01250700 | 5.39759200  | 1.79925100  |
| C | 1.47270100  | 5.18283600  | 2.87654700  |
| H | 1.50632300  | 5.80680800  | 1.98025200  |
| H | 1.24567700  | 5.83571100  | 3.72491400  |
| H | 2.46364300  | 4.75350600  | 3.03891000  |
| C | -3.10431700 | 3.69799800  | 1.33357900  |
| H | -3.13482000 | 3.22398200  | 0.34511700  |
| H | -3.94481500 | 3.30830400  | 1.91432700  |
| H | -3.24209200 | 4.77068800  | 1.19520400  |
| C | 0.01179400  | 0.37963000  | 3.48853700  |
| H | -0.77560200 | -0.00752500 | 4.14144900  |
| H | 0.06525100  | -0.27056000 | 2.60720000  |
| H | 0.96376200  | 0.31361500  | 4.01966800  |
| C | 0.09652300  | 0.94047100  | -1.40863400 |
| C | -0.83763900 | 1.15813600  | -0.36188500 |
| H | -0.26419800 | 0.36895500  | -2.26482900 |
| C | -1.89741200 | 0.33194200  | -0.09324600 |
| H | -1.62583400 | -1.29012800 | -1.11980600 |
| O | -2.31602700 | -0.61521800 | -1.00868300 |
| C | 1.18024500  | 1.90987400  | -1.70044200 |
| C | 1.85035500  | 1.84210500  | -2.93042600 |
| C | 1.65432900  | 2.82231800  | -0.74511300 |
| C | 2.95042700  | 2.65052200  | -3.19764300 |
| H | 1.50265600  | 1.13776100  | -3.68240800 |
| C | 2.76178000  | 3.62372500  | -1.00854300 |
| H | 1.16347000  | 2.91690800  | 0.22138400  |
| C | 3.41950900  | 3.54044900  | -2.23350400 |
| H | 3.45789100  | 2.56579000  | -4.15284900 |
| H | 3.11409600  | 4.31331700  | -0.24656300 |
| H | 4.28840400  | 4.15872400  | -2.43356300 |
| H | -0.58673800 | 1.90624500  | 0.37954100  |
| C | 5.37649100  | 1.28370000  | 1.08213700  |
| C | 4.27090600  | 0.71402100  | 0.45307900  |
| C | 4.26476500  | 0.41061300  | -0.89633700 |
| C | 5.41394000  | 0.71641500  | -1.61225700 |
| C | 6.52304500  | 1.31599000  | -1.02401300 |
| C | 6.50759900  | 1.60106000  | 0.34152800  |
| C | 5.11799400  | 1.43307500  | 2.56511700  |
| C | 3.93992600  | 0.48081100  | 2.80421700  |

|    |             |             |             |
|----|-------------|-------------|-------------|
| C  | 3.16859200  | 0.52146600  | 1.46557000  |
| H  | 3.42206700  | -0.07787100 | -1.37123900 |
| H  | 7.39944100  | 1.53334000  | -1.62373600 |
| H  | 7.38045500  | 2.04172600  | 0.81287700  |
| H  | 5.96874900  | 1.15430500  | 3.19058400  |
| H  | 3.31163300  | 0.76495800  | 3.66078100  |
| H  | 2.47610500  | 1.37335200  | 1.45039100  |
| H  | 4.82677200  | 2.45916600  | 2.81972000  |
| Br | 5.48096700  | 0.25396100  | -3.44992200 |
| O  | 4.47407400  | -0.81408900 | 3.00538200  |
| C  | 3.48836400  | -1.80134600 | 3.21967700  |
| H  | 3.99433700  | -2.76304800 | 3.26163700  |
| H  | 2.94946100  | -1.61519400 | 4.16114700  |
| N  | 2.37945100  | -0.68774500 | 1.29733600  |
| C  | 1.43282700  | -0.91176600 | 0.36482200  |
| C  | 2.51376200  | -1.80188500 | 2.08177700  |
| N  | 1.66810000  | -2.72151900 | 1.72211900  |
| N  | 1.01338100  | -2.14528100 | 0.66162600  |
| C  | -0.04619100 | -2.82188300 | -0.02241800 |
| C  | 0.04345000  | -2.98180800 | -1.41482000 |
| C  | -1.15751300 | -3.26422800 | 0.71296100  |
| C  | -1.04751800 | -3.56820300 | -2.06772300 |
| C  | -2.18929300 | -3.88737200 | 0.01343800  |
| C  | -2.16920900 | -4.02331300 | -1.37664500 |
| H  | -1.00269100 | -3.68380100 | -3.14727300 |
| H  | -3.04587500 | -4.26039600 | 0.57128100  |
| C  | -3.35097200 | -4.60951600 | -2.10270900 |
| H  | -3.06532400 | -4.98871300 | -3.08551100 |
| H  | -3.79976600 | -5.42509100 | -1.53088100 |
| H  | -4.12118700 | -3.84449900 | -2.25237200 |
| C  | -1.27384500 | -3.05176600 | 2.19940000  |
| H  | -0.53490300 | -3.63819700 | 2.74880600  |
| H  | -1.10434100 | -2.00132300 | 2.45676100  |
| H  | -2.27241500 | -3.33015400 | 2.54385300  |
| C  | 1.25329000  | -2.55437200 | -2.20612800 |
| H  | 1.22842700  | -1.48050400 | -2.42388400 |
| H  | 2.17879600  | -2.75083400 | -1.66255300 |
| H  | 1.27180300  | -3.08418300 | -3.15996200 |
| H  | 0.77780200  | 0.02871500  | -0.64488100 |
| B  | 5.04343800  | -2.95784500 | -0.02943300 |
| F  | 6.05664000  | -2.03855200 | -0.28364300 |
| F  | 5.24466500  | -4.12032300 | -0.77639200 |
| F  | 3.79498000  | -2.39590700 | -0.38870800 |
| F  | 5.00962500  | -3.27684200 | 1.33826900  |

M3

|    |             |             |             |
|----|-------------|-------------|-------------|
| C  | 2.90101400  | 2.73140800  | -0.26317300 |
| C  | 1.86958700  | 1.79137700  | -0.28879700 |
| C  | 2.00370800  | 0.54040100  | 0.29474200  |
| C  | 3.21469900  | 0.25801900  | 0.92138400  |
| C  | 4.26347900  | 1.17246200  | 0.95369700  |
| C  | 4.10658100  | 2.42240600  | 0.35277200  |
| C  | 2.47080900  | 4.00352600  | -0.95759100 |
| C  | 0.94311200  | 3.89050100  | -0.95482400 |
| C  | 0.69051200  | 2.36656300  | -1.04328800 |
| H  | 1.20941600  | -0.20017600 | 0.26980000  |
| H  | 5.19000300  | 0.91209200  | 1.45242700  |
| H  | 4.91706900  | 3.14357700  | 0.38545900  |
| H  | 2.78878300  | 4.91542800  | -0.44771700 |
| H  | 0.44924400  | 4.44499100  | -1.76187600 |
| H  | 0.65812100  | 1.99670600  | -2.07265100 |
| H  | 2.84387800  | 4.03683200  | -1.98677500 |
| Br | 3.42275400  | -1.42725100 | 1.76002500  |
| O  | 0.50721500  | 4.37473400  | 0.31067600  |
| C  | -0.89101200 | 4.32506800  | 0.47608800  |
| H  | -1.12461100 | 4.66963300  | 1.48374000  |
| H  | -1.40075600 | 4.97524100  | -0.24863900 |
| N  | -0.61323300 | 2.04848200  | -0.45697800 |
| C  | -1.27836100 | 0.87835500  | -0.51269200 |
| C  | -1.36301300 | 2.91562800  | 0.28763800  |
| N  | -2.46268000 | 2.35312500  | 0.69699800  |
| N  | -2.39415100 | 1.08427900  | 0.18636200  |
| C  | -3.48940100 | 0.17055900  | 0.35689900  |
| C  | -4.31070500 | -0.08384200 | -0.74431100 |
| C  | -3.67195900 | -0.41490900 | 1.60948200  |
| C  | -5.36111500 | -0.97906300 | -0.55436700 |
| C  | -4.74009900 | -1.30017100 | 1.74754200  |
| C  | -5.59123400 | -1.59154200 | 0.68014600  |
| H  | -6.01664000 | -1.20332700 | -1.39189800 |
| H  | -4.90458700 | -1.77837300 | 2.70961700  |
| C  | -6.75460500 | -2.53175300 | 0.86027300  |
| H  | -6.95184100 | -3.09433200 | -0.05492000 |
| H  | -6.56839900 | -3.23981300 | 1.67040900  |
| H  | -7.66375200 | -1.97446900 | 1.10790100  |
| C  | -2.73844300 | -0.10727200 | 2.74986900  |
| H  | -1.69554300 | -0.27837600 | 2.46192200  |
| H  | -2.82233800 | 0.94016200  | 3.05347300  |
| H  | -2.96437700 | -0.73744700 | 3.61084100  |

|   |             |             |             |
|---|-------------|-------------|-------------|
| C | -4.06372400 | 0.58241500  | -2.07265300 |
| H | -4.04173000 | 1.67157600  | -1.96202500 |
| H | -3.10510900 | 0.27814500  | -2.50696700 |
| H | -4.85600400 | 0.32705700  | -2.77755700 |
| C | -0.46017800 | -2.75683400 | -1.46492700 |
| C | -0.91543900 | -1.51597300 | -0.74393200 |
| H | -0.67428500 | -2.62439700 | -2.53264800 |
| C | -0.84537900 | -0.29714900 | -1.34908600 |
| O | -0.44597500 | 0.04400700  | -2.51604200 |
| C | 1.02420300  | -3.03603200 | -1.30961400 |
| C | 1.49673800  | -4.21293500 | -0.72946500 |
| C | 1.95383800  | -2.09047300 | -1.76517300 |
| C | 2.86727700  | -4.45300200 | -0.61382400 |
| H | 0.78593100  | -4.95240400 | -0.36841000 |
| C | 3.31888500  | -2.32752000 | -1.64987300 |
| H | 1.57807800  | -1.17083100 | -2.21000500 |
| C | 3.78162500  | -3.51375000 | -1.07826900 |
| H | 3.21671600  | -5.37603700 | -0.16067900 |
| H | 4.02720100  | -1.58224000 | -2.00118800 |
| H | 4.84779200  | -3.69624600 | -0.98556000 |
| H | -1.27779800 | -1.59079400 | 0.27703400  |
| H | -1.02871400 | -3.62833300 | -1.12377300 |

M3<sup>NHCH</sup>

|    |             |             |             |
|----|-------------|-------------|-------------|
| C  | -6.90656500 | -1.05399000 | -0.66799300 |
| C  | -5.61788800 | -0.52914900 | -0.56532900 |
| C  | -5.33678300 | 0.78039800  | -0.92058500 |
| C  | -6.39830400 | 1.56986500  | -1.34977900 |
| C  | -7.69264500 | 1.07252700  | -1.46537200 |
| C  | -7.94778500 | -0.25863700 | -1.12939000 |
| C  | -6.91607500 | -2.49227800 | -0.20125500 |
| C  | -5.66047700 | -2.56454000 | 0.67471900  |
| C  | -4.68017200 | -1.58382600 | -0.01760000 |
| H  | -4.33480100 | 1.18621200  | -0.86036000 |
| H  | -8.49325600 | 1.71997100  | -1.80381100 |
| H  | -8.95673700 | -0.65087600 | -1.20885900 |
| H  | -7.80271900 | -2.76791900 | 0.37324400  |
| H  | -5.23626300 | -3.57373100 | 0.77020100  |
| H  | -4.15919700 | -2.09503300 | -0.82984700 |
| H  | -6.82533000 | -3.18147000 | -1.04837700 |
| Br | -6.04678500 | 3.38947600  | -1.76066100 |
| O  | -6.04170600 | -2.07896100 | 1.95234200  |
| C  | -4.95546700 | -2.00982400 | 2.84866100  |
| H  | -5.31953000 | -1.62095600 | 3.79950400  |



|   |             |             |             |
|---|-------------|-------------|-------------|
| H | -4.52485100 | -3.00935100 | 3.01313800  |
| N | -3.68645500 | -1.08054200 | 0.93124200  |
| C | -2.63503800 | -0.19694900 | 0.70195500  |
| C | -3.90920600 | -1.09951800 | 2.29096600  |
| N | -3.11895600 | -0.32233600 | 2.94389100  |
| N | -2.31350600 | 0.25765800  | 1.97082700  |
| C | -1.51753600 | 1.38772900  | 2.31882600  |
| C | -0.37876100 | 1.18447900  | 3.10999100  |
| C | -1.87815000 | 2.66372400  | 1.85714300  |
| C | 0.43799400  | 2.28224900  | 3.38314400  |
| C | -1.01702000 | 3.72478700  | 2.13801500  |
| C | 0.15153700  | 3.55346900  | 2.88215100  |
| H | 1.31750700  | 2.14457300  | 4.00923700  |
| H | -1.27366900 | 4.71599000  | 1.77155600  |
| C | 1.07963100  | 4.71350800  | 3.13012300  |
| H | 1.64581400  | 4.95193300  | 2.22372800  |
| H | 0.52279800  | 5.61071800  | 3.41112100  |
| H | 1.79440700  | 4.48685900  | 3.92379000  |
| C | -3.12590500 | 2.89826400  | 1.04844900  |
| H | -2.92594900 | 2.75847600  | -0.02056000 |
| H | -3.92651300 | 2.20884500  | 1.33143000  |
| H | -3.48227900 | 3.92025100  | 1.18994700  |
| C | -0.04266600 | -0.18239700 | 3.64529000  |
| H | -0.91517700 | -0.65585400 | 4.10119100  |
| H | 0.29596400  | -0.84766100 | 2.84209600  |
| H | 0.74702800  | -0.11935300 | 4.39724100  |
| C | -0.26799600 | 1.16634100  | -1.85663700 |
| C | -0.89188200 | 0.90101300  | -0.68146900 |
| H | -0.67786800 | 0.77200600  | -2.78393300 |
| C | -2.04845100 | 0.08507000  | -0.51177500 |
| H | -2.01849400 | -1.13618200 | -1.99987100 |
| O | -2.63461600 | -0.47723700 | -1.64013600 |
| C | 1.00065800  | 1.89597400  | -1.94688500 |
| C | 1.78049400  | 1.78885500  | -3.11183800 |
| C | 1.50972200  | 2.67666000  | -0.88875900 |
| C | 3.02034200  | 2.41201000  | -3.21222600 |
| H | 1.40316500  | 1.19989100  | -3.94423800 |
| C | 2.74912200  | 3.29901900  | -0.99290600 |
| H | 0.91481700  | 2.82882100  | 0.01039700  |
| C | 3.51494200  | 3.16726000  | -2.15137500 |
| H | 3.61258700  | 2.29221600  | -4.11361500 |
| H | 3.12144600  | 3.89083100  | -0.16143700 |
| H | 4.49357700  | 3.63130000  | -2.22126500 |
| H | -0.43737800 | 1.27710200  | 0.23024000  |

|    |             |             |             |
|----|-------------|-------------|-------------|
| C  | 5.38415900  | 1.24266400  | 1.71031400  |
| C  | 4.42036200  | 0.74557600  | 0.83231400  |
| C  | 4.64554800  | 0.62733100  | -0.52639500 |
| C  | 5.89235500  | 1.02956900  | -0.99212500 |
| C  | 6.87084600  | 1.54265300  | -0.14750400 |
| C  | 6.61685700  | 1.65107500  | 1.22121400  |
| C  | 4.85969400  | 1.23175400  | 3.12949200  |
| C  | 3.68990400  | 0.24442700  | 3.05057300  |
| C  | 3.16429200  | 0.44633800  | 1.60937600  |
| H  | 3.91083800  | 0.20739300  | -1.20575200 |
| H  | 7.83005900  | 1.84027100  | -0.55514000 |
| H  | 7.38422200  | 2.03395000  | 1.88622300  |
| H  | 5.59125600  | 0.90047800  | 3.86915200  |
| H  | 2.91025800  | 0.41242100  | 3.80459900  |
| H  | 2.45859800  | 1.28726000  | 1.57158400  |
| H  | 4.49265800  | 2.22139100  | 3.42581300  |
| Br | 6.25765400  | 0.85871500  | -2.83915600 |
| O  | 4.24027000  | -1.05151700 | 3.18176200  |
| C  | 3.31921900  | -2.10880900 | 3.06079100  |
| H  | 3.89230400  | -3.03205200 | 2.99403900  |
| H  | 2.64574100  | -2.15101800 | 3.92910300  |
| N  | 2.43350700  | -0.74538200 | 1.18641700  |
| C  | 1.55589600  | -0.87241500 | 0.19229500  |
| C  | 2.48948400  | -1.95223700 | 1.82233900  |
| N  | 1.65850900  | -2.79944000 | 1.27978400  |
| N  | 1.07457900  | -2.10274300 | 0.26383800  |
| C  | 0.01743500  | -2.66619700 | -0.53729400 |
| C  | 0.11569100  | -2.61722500 | -1.93603000 |
| C  | -1.09024400 | -3.21418300 | 0.12614200  |
| C  | -0.95135500 | -3.14577900 | -2.66980400 |
| C  | -2.11119200 | -3.74267000 | -0.66182000 |
| C  | -2.07042400 | -3.71053800 | -2.05542900 |
| H  | -0.89346000 | -3.12128800 | -3.75476100 |
| H  | -2.97109500 | -4.18410200 | -0.16393500 |
| C  | -3.22402500 | -4.22303900 | -2.87541100 |
| H  | -2.87282200 | -4.78193600 | -3.74567100 |
| H  | -3.87293100 | -4.87127100 | -2.28280000 |
| H  | -3.82758500 | -3.38653100 | -3.24454600 |
| C  | -1.24039000 | -3.20826400 | 1.62417400  |
| H  | -0.49767600 | -3.84168900 | 2.11170500  |
| H  | -1.12520500 | -2.19401600 | 2.02131300  |
| H  | -2.23736500 | -3.56423400 | 1.89274500  |
| C  | 1.30188100  | -2.03841900 | -2.66101100 |
| H  | 1.26356500  | -0.94300200 | -2.67391100 |

|   |            |             |             |
|---|------------|-------------|-------------|
| H | 2.24234100 | -2.33211600 | -2.19491400 |
| H | 1.29554200 | -2.37426800 | -3.69889900 |
| H | 1.26935200 | -0.11186400 | -0.52051600 |
| B | 4.99356800 | -2.67364500 | -0.41398700 |
| F | 5.99622600 | -1.98183800 | -1.08672200 |
| F | 5.06152700 | -4.03438200 | -0.69938100 |
| F | 3.72861300 | -2.17685200 | -0.83180400 |
| F | 5.09193900 | -2.46702300 | 0.96965300  |

TS4-RS

|    |             |             |             |
|----|-------------|-------------|-------------|
| C  | 1.84048500  | -0.17806600 | 4.19342200  |
| C  | 1.17657000  | -0.31855300 | 2.97097300  |
| C  | 1.86454200  | -0.35815400 | 1.76951000  |
| C  | 3.24874500  | -0.18670000 | 1.82106200  |
| C  | 3.92451000  | 0.01017600  | 3.01997600  |
| C  | 3.21486700  | 0.00231900  | 4.22193900  |
| C  | 0.86586700  | -0.33035000 | 5.34041800  |
| C  | -0.29808800 | -1.06211300 | 4.66726500  |
| C  | -0.30824100 | -0.44505400 | 3.25120500  |
| H  | 1.36891200  | -0.53894300 | 0.81815900  |
| H  | 5.00061100  | 0.13907600  | 3.01588900  |
| H  | 3.74317400  | 0.11071800  | 5.16363400  |
| H  | 1.26356400  | -0.91318100 | 6.17336000  |
| H  | -1.26261000 | -0.96954100 | 5.18017000  |
| H  | -0.79647200 | 0.53499300  | 3.25366800  |
| H  | 0.53075200  | 0.63990600  | 5.72282900  |
| Br | 4.22554900  | -0.25099000 | 0.19929700  |
| O  | 0.09580000  | -2.42388000 | 4.56253100  |
| C  | -0.83027300 | -3.24852200 | 3.89742100  |
| H  | -0.35312400 | -4.21403800 | 3.72577600  |
| H  | -1.73254800 | -3.40404500 | 4.50493000  |
| N  | -1.05718300 | -1.30926600 | 2.34033600  |
| C  | -1.73227900 | -0.99888200 | 1.20853100  |
| C  | -1.25917500 | -2.63785500 | 2.59405800  |
| N  | -1.98509300 | -3.17892100 | 1.66029400  |
| N  | -2.27455500 | -2.15113200 | 0.81278000  |
| C  | -3.00995300 | -2.44583700 | -0.39127000 |
| C  | -4.40168500 | -2.35224000 | -0.37572700 |
| C  | -2.27582200 | -2.91866500 | -1.47969200 |
| C  | -5.06321700 | -2.67158000 | -1.56035000 |
| C  | -2.98658700 | -3.23434500 | -2.63464000 |
| C  | -4.37399800 | -3.09392200 | -2.69848300 |
| H  | -6.14723400 | -2.59820200 | -1.58879900 |
| H  | -2.44252700 | -3.59379100 | -3.50457700 |

|   |             |             |             |
|---|-------------|-------------|-------------|
| C | -5.11488400 | -3.38769800 | -3.97639800 |
| H | -4.59789000 | -4.14581100 | -4.56867700 |
| H | -6.13055800 | -3.73487700 | -3.77451900 |
| H | -5.18933200 | -2.48279800 | -4.58784700 |
| C | -0.78189000 | -3.08641200 | -1.39557300 |
| H | -0.28664600 | -2.15398600 | -1.10298700 |
| H | -0.51636600 | -3.84997100 | -0.65724500 |
| H | -0.37525300 | -3.38517000 | -2.36343400 |
| C | -5.14952900 | -1.98272400 | 0.87607500  |
| H | -4.96097800 | -2.72078300 | 1.66299000  |
| H | -4.82530800 | -1.00542300 | 1.23954000  |
| H | -6.22303200 | -1.95734500 | 0.68319200  |
| C | -1.45117500 | 2.81164400  | 1.18691100  |
| C | -1.12564000 | 1.41313600  | 0.67201300  |
| H | -0.50331500 | 3.32819900  | 1.36925600  |
| C | -2.13860000 | 0.44458700  | 0.85277900  |
| O | -3.35859200 | 0.62356700  | 0.97531800  |
| C | -2.32664700 | 3.73792100  | 0.35879500  |
| C | -3.30343700 | 3.28452300  | -0.53315700 |
| C | -2.16348700 | 5.11890400  | 0.51938300  |
| C | -4.07711500 | 4.19257700  | -1.25612200 |
| H | -3.44524900 | 2.21785600  | -0.67692300 |
| C | -2.94185800 | 6.02630200  | -0.19251900 |
| H | -1.39872300 | 5.48489700  | 1.20093100  |
| C | -3.90274700 | 5.56395000  | -1.09019100 |
| H | -4.82049300 | 3.82077700  | -1.95469500 |
| H | -2.79093600 | 7.09268000  | -0.05485900 |
| H | -4.50634000 | 6.26617500  | -1.65641400 |
| H | -0.12374700 | 1.07133600  | 0.91239400  |
| H | -1.93994400 | 2.71045100  | 2.16887600  |
| C | -0.50246300 | 1.72020400  | -1.38496700 |
| C | -0.30033600 | 0.52119200  | -2.09664300 |
| H | -1.46543100 | 2.17337700  | -1.58741800 |
| C | -1.48616400 | -0.14562900 | -2.57172700 |
| H | -1.31023100 | -1.01176500 | -3.24155300 |
| O | -2.63338500 | 0.17952100  | -2.26982800 |
| C | 0.59383900  | 2.67846700  | -1.11670500 |
| C | 1.83884200  | 2.26178800  | -0.63067800 |
| C | 0.39177000  | 4.04259800  | -1.35859300 |
| C | 2.85453300  | 3.17695900  | -0.38384700 |
| H | 2.01721600  | 1.20860500  | -0.45833600 |
| C | 1.40960800  | 4.96238600  | -1.11619800 |
| H | -0.56957500 | 4.38001400  | -1.73546600 |
| C | 2.64141000  | 4.53446800  | -0.62415700 |

|   |            |             |             |
|---|------------|-------------|-------------|
| H | 3.80853500 | 2.81591800  | -0.00983800 |
| H | 1.23720200 | 6.01638700  | -1.31021500 |
| H | 3.43094100 | 5.25398200  | -0.43196300 |
| C | 0.95824100 | -0.06697100 | -2.37373400 |
| C | 2.02121300 | -0.59714300 | -2.64675300 |
| C | 3.29861000 | -1.13741600 | -2.98733300 |
| C | 4.42657600 | -0.29703800 | -3.02618700 |
| C | 3.45980600 | -2.50327400 | -3.26662900 |
| C | 5.68109400 | -0.81830300 | -3.31763100 |
| H | 4.30026900 | 0.76059700  | -2.81378900 |
| C | 4.71709800 | -3.01434300 | -3.56953200 |
| H | 2.59249700 | -3.15498500 | -3.23738300 |
| C | 5.83189700 | -2.17795400 | -3.59132800 |
| H | 6.54416900 | -0.16044600 | -3.33718100 |
| H | 4.82797800 | -4.07265700 | -3.78318700 |
| H | 6.81206700 | -2.58210400 | -3.82156800 |

TS4-RR

|    |            |             |             |
|----|------------|-------------|-------------|
| C  | 4.76476400 | 0.63458800  | 1.21976400  |
| C  | 3.64450200 | 0.31074600  | 0.44661800  |
| C  | 3.40508600 | 0.90863300  | -0.77904300 |
| C  | 4.31749500 | 1.87461300  | -1.19986100 |
| C  | 5.42448000 | 2.23675800  | -0.44129800 |
| C  | 5.65336500 | 1.60566300  | 0.78310200  |
| C  | 4.81747000 | -0.22896100 | 2.46002900  |
| C  | 3.92016100 | -1.40057600 | 2.05872500  |
| C  | 2.82336500 | -0.71227900 | 1.21359700  |
| H  | 2.54035600 | 0.65673200  | -1.38521400 |
| H  | 6.10816700 | 2.99328200  | -0.80855000 |
| H  | 6.52872500 | 1.86389800  | 1.37031600  |
| H  | 5.82202100 | -0.57403100 | 2.71181100  |
| H  | 3.51197100 | -1.98134200 | 2.89480100  |
| H  | 2.11662500 | -0.20406200 | 1.87257800  |
| H  | 4.39731200 | 0.28749700  | 3.33066800  |
| Br | 4.02530800 | 2.71851300  | -2.87335400 |
| O  | 4.70549700 | -2.21630500 | 1.20241700  |
| C  | 4.01969800 | -3.31580900 | 0.65767600  |
| H  | 4.64097100 | -3.73771000 | -0.13324700 |
| H  | 3.84557400 | -4.09028900 | 1.41793800  |
| N  | 2.08832000 | -1.72432000 | 0.44492100  |
| C  | 0.81249000 | -1.76871700 | -0.02755200 |
| C  | 2.68022000 | -2.91722000 | 0.10932200  |
| N  | 1.86858800 | -3.67462600 | -0.56402400 |
| N  | 0.71842100 | -2.94869100 | -0.64496300 |

|   |             |             |             |
|---|-------------|-------------|-------------|
| C | -0.46658000 | -3.58156300 | -1.17114400 |
| C | -1.27258300 | -4.27645600 | -0.27166500 |
| C | -0.74110100 | -3.46235900 | -2.53191600 |
| C | -2.41509000 | -4.88720000 | -0.78890800 |
| C | -1.88949900 | -4.09551900 | -2.99968800 |
| C | -2.73418400 | -4.80996300 | -2.14495000 |
| H | -3.07058400 | -5.42914900 | -0.11168600 |
| H | -2.13841500 | -4.01846800 | -4.05517100 |
| C | -3.95936100 | -5.49986100 | -2.68697600 |
| H | -4.69369500 | -5.67766000 | -1.89847500 |
| H | -4.43110300 | -4.90413300 | -3.47195300 |
| H | -3.69620000 | -6.46905600 | -3.12277000 |
| C | 0.15536700  | -2.64720100 | -3.42045300 |
| H | 0.20237500  | -1.61180800 | -3.06329300 |
| H | 1.17610000  | -3.04329000 | -3.41810200 |
| H | -0.21249700 | -2.65296800 | -4.44769500 |
| C | -0.93676200 | -4.32714800 | 1.19437000  |
| H | 0.09535300  | -4.65540300 | 1.35346700  |
| H | -1.05854900 | -3.33785000 | 1.65423500  |
| H | -1.60506400 | -5.01275500 | 1.71699000  |
| C | -1.87453100 | 0.17150400  | 1.88758300  |
| C | -0.48754100 | -0.16019600 | 1.38499800  |
| H | -2.44141400 | 0.65246800  | 1.08386700  |
| C | -0.42171500 | -0.93402500 | 0.21658200  |
| O | -1.32884500 | -0.99832900 | -0.63309400 |
| C | -2.59282000 | -1.08585300 | 2.33348600  |
| C | -2.37498900 | -1.61474400 | 3.61012000  |
| C | -3.44001600 | -1.77319900 | 1.45802300  |
| C | -2.98774800 | -2.80143000 | 4.00558200  |
| H | -1.71985600 | -1.08665300 | 4.29951400  |
| C | -4.05597700 | -2.95927700 | 1.85235100  |
| H | -3.59342900 | -1.37803300 | 0.45920000  |
| C | -3.83238300 | -3.47765000 | 3.12634000  |
| H | -2.81133600 | -3.19500000 | 5.00202700  |
| H | -4.71115700 | -3.47950700 | 1.15980600  |
| H | -4.31370800 | -4.40090600 | 3.43367300  |
| H | 0.27717800  | -0.27535700 | 2.14677200  |
| H | -1.80133200 | 0.87515200  | 2.72180500  |
| C | 0.07371800  | 1.74801400  | 0.32354200  |
| C | -0.78497500 | 1.79591900  | -0.77957000 |
| H | 1.05732100  | 1.36850200  | 0.06650100  |
| C | -0.38402100 | 1.05667800  | -1.95952700 |
| H | -1.11968900 | 1.05650900  | -2.78397000 |
| O | 0.69403900  | 0.47112600  | -2.09426900 |

|   |             |            |             |
|---|-------------|------------|-------------|
| C | 0.09057300  | 2.62903700 | 1.50735800  |
| C | 1.31696300  | 2.79683800 | 2.17044800  |
| C | -1.03364100 | 3.30363900 | 2.00536500  |
| C | 1.42218400  | 3.61068600 | 3.29194200  |
| H | 2.20188000  | 2.29616000 | 1.78053500  |
| C | -0.92695900 | 4.11644500 | 3.13030100  |
| H | -1.99134800 | 3.18558600 | 1.51288900  |
| C | 0.29656900  | 4.27380700 | 3.77804200  |
| H | 2.38246800  | 3.73142600 | 3.78301200  |
| H | -1.80762600 | 4.63042300 | 3.50246200  |
| H | 0.37307100  | 4.91035900 | 4.65345800  |
| C | -2.05616300 | 2.42784100 | -0.82501400 |
| C | -3.14553800 | 2.95782800 | -0.93924400 |
| C | -4.42434500 | 3.58845900 | -1.03916100 |
| C | -4.85425600 | 4.48508400 | -0.04669300 |
| C | -5.26971200 | 3.32048800 | -2.12832400 |
| C | -6.09967600 | 5.09360100 | -0.14364700 |
| H | -4.20112500 | 4.69874600 | 0.79355600  |
| C | -6.51250800 | 3.93583700 | -2.21824500 |
| H | -4.94027000 | 2.62735400 | -2.89512400 |
| C | -6.93311200 | 4.82273700 | -1.22815600 |
| H | -6.42071200 | 5.78400300 | 0.62969200  |
| H | -7.15664200 | 3.72092700 | -3.06484500 |
| H | -7.90443300 | 5.30052900 | -1.30144300 |

TS4-SS

|    |            |             |             |
|----|------------|-------------|-------------|
| C  | 4.64251900 | -1.45874500 | -1.71343200 |
| C  | 3.70324900 | -0.80214800 | -0.91583000 |
| C  | 3.68197600 | -0.96061400 | 0.46270000  |
| C  | 4.60788900 | -1.83791200 | 1.02109400  |
| C  | 5.53424100 | -2.52673100 | 0.24413700  |
| C  | 5.55749600 | -2.32930000 | -1.13690200 |
| C  | 4.49292900 | -1.03641000 | -3.15740000 |
| C  | 3.71768600 | 0.27837900  | -3.03717000 |
| C  | 2.80996700 | 0.03947800  | -1.80794400 |
| H  | 2.97879500 | -0.42841400 | 1.09573200  |
| H  | 6.23981400 | -3.19987800 | 0.71708100  |
| H  | 6.29580600 | -2.84321000 | -1.74376400 |
| H  | 5.44477300 | -0.87781700 | -3.66811900 |
| H  | 3.14295000 | 0.55183500  | -3.93018100 |
| H  | 1.91252100 | -0.50105800 | -2.12174800 |
| H  | 3.91094400 | -1.76671000 | -3.72974500 |
| Br | 4.59165600 | -2.09877300 | 2.89792300  |
| O  | 4.66766200 | 1.28487400  | -2.72472700 |

|   |             |             |             |
|---|-------------|-------------|-------------|
| C | 4.08542400  | 2.55665700  | -2.56553200 |
| H | 4.86153000  | 3.24260700  | -2.22466800 |
| H | 3.67725600  | 2.92764100  | -3.51604900 |
| N | 2.37375200  | 1.31150500  | -1.23846700 |
| C | 1.31174600  | 1.59895000  | -0.44613300 |
| C | 2.97204400  | 2.49924400  | -1.56300400 |
| N | 2.38712400  | 3.49646500  | -0.97457800 |
| N | 1.36603500  | 2.92348500  | -0.27195600 |
| C | 0.53854700  | 3.78998700  | 0.52748400  |
| C | -0.31977800 | 4.66270700  | -0.13760000 |
| C | 0.68500700  | 3.76081900  | 1.91606800  |
| C | -1.07483900 | 5.53335300  | 0.65006900  |
| C | -0.08837200 | 4.65076100  | 2.65510500  |
| C | -0.97572300 | 5.53897500  | 2.04047700  |
| H | -1.75883400 | 6.22141500  | 0.15958400  |
| H | 0.00243500  | 4.65039300  | 3.73854400  |
| C | -1.82406900 | 6.46509500  | 2.87297300  |
| H | -2.68680500 | 5.93093800  | 3.28347900  |
| H | -1.25685300 | 6.86786700  | 3.71569900  |
| H | -2.20045700 | 7.29965400  | 2.27794700  |
| C | 1.61860000  | 2.78761300  | 2.58383700  |
| H | 1.20138300  | 1.77500300  | 2.54883400  |
| H | 2.59700400  | 2.76518100  | 2.09396800  |
| H | 1.76602400  | 3.05514300  | 3.63110600  |
| C | -0.41944600 | 4.67536800  | -1.64022300 |
| H | 0.39634400  | 5.26318800  | -2.07342600 |
| H | -0.35084400 | 3.66519400  | -2.05510800 |
| H | -1.36353000 | 5.12584300  | -1.95234500 |
| C | -0.00944200 | -1.44461400 | 1.46586200  |
| C | 0.39023300  | -0.67654100 | 0.20458000  |
| H | 0.22808700  | -0.79517900 | 2.32130200  |
| C | 0.25496500  | 0.72902700  | 0.19750100  |
| O | -0.71665700 | 1.34886100  | 0.66195800  |
| C | -1.41917100 | -1.95520900 | 1.67988100  |
| C | -2.52165400 | -1.10155600 | 1.61157700  |
| C | -1.62354100 | -3.29390600 | 2.02288900  |
| C | -3.80299800 | -1.58597700 | 1.86071500  |
| H | -2.36262500 | -0.06225800 | 1.34112900  |
| C | -2.90336600 | -3.77964100 | 2.27567400  |
| H | -0.77210300 | -3.96905700 | 2.06596100  |
| C | -4.00103200 | -2.92554200 | 2.19111200  |
| H | -4.65227400 | -0.91259300 | 1.78684600  |
| H | -3.04358000 | -4.82740900 | 2.52496200  |
| H | -5.00311800 | -3.29897500 | 2.38196900  |



|   |             |             |             |
|---|-------------|-------------|-------------|
| H | 1.28998500  | -1.07573500 | -0.24133400 |
| H | 0.67051400  | -2.29986400 | 1.54241200  |
| C | -0.96529500 | -1.15469200 | -1.51762600 |
| C | -1.91936200 | -0.12815200 | -1.65216200 |
| H | -0.09106100 | -0.95993400 | -2.12930800 |
| C | -1.41914600 | 1.12310300  | -2.15323500 |
| H | -2.15571300 | 1.94228800  | -2.23726600 |
| O | -0.23335400 | 1.32044500  | -2.45788700 |
| C | -1.21162300 | -2.59914900 | -1.30702900 |
| C | -2.48892200 | -3.15832800 | -1.18439800 |
| C | -0.10365700 | -3.46074700 | -1.27987400 |
| C | -2.64738600 | -4.53257300 | -1.03283200 |
| H | -3.36051600 | -2.51638400 | -1.19778400 |
| C | -0.26055400 | -4.83046600 | -1.11404700 |
| H | 0.89647200  | -3.04373200 | -1.38153500 |
| C | -1.53930100 | -5.37358200 | -0.98906100 |
| H | -3.64709000 | -4.94463100 | -0.93445100 |
| H | 0.61233100  | -5.47510400 | -1.08857400 |
| H | -1.66782700 | -6.44371400 | -0.86126100 |
| C | -3.29930200 | -0.16342300 | -1.32110300 |
| C | -4.49594700 | -0.12200600 | -1.10613100 |
| C | -5.89715600 | -0.15218600 | -0.82808900 |
| C | -6.49422000 | -1.33177200 | -0.34886900 |
| C | -6.69831900 | 0.98326000  | -1.02985000 |
| C | -7.85673800 | -1.36788000 | -0.07874900 |
| H | -5.87292300 | -2.20727200 | -0.18388900 |
| C | -8.06076900 | 0.93684600  | -0.75824900 |
| H | -6.24025200 | 1.89490900  | -1.39883800 |
| C | -8.64540700 | -0.23589900 | -0.28248900 |
| H | -8.30562600 | -2.28376900 | 0.29224800  |
| H | -8.66928000 | 1.82116500  | -0.91806200 |
| H | -9.70908800 | -0.26764800 | -0.07102300 |

TS4-SR

|   |            |             |             |
|---|------------|-------------|-------------|
| C | 4.31124700 | -1.21595800 | -1.52357800 |
| C | 3.27111200 | -0.53915100 | -0.88673600 |
| C | 3.19244000 | -0.44570500 | 0.49282900  |
| C | 4.17712900 | -1.09130800 | 1.23462700  |
| C | 5.20147600 | -1.81140900 | 0.62783200  |
| C | 5.27407100 | -1.86940300 | -0.76572300 |
| C | 4.20260100 | -1.03867400 | -3.02230600 |
| C | 3.31572500 | 0.20692200  | -3.14499600 |
| C | 2.36309300 | 0.07167900  | -1.93332000 |
| H | 2.40540400 | 0.11539000  | 0.98642300  |

|    |             |             |             |
|----|-------------|-------------|-------------|
| H  | 5.94996100  | -2.30161700 | 1.23945200  |
| H  | 6.09267900  | -2.40003100 | -1.24086600 |
| H  | 5.16331200  | -0.87750300 | -3.51516200 |
| H  | 2.77355400  | 0.28548700  | -4.09484800 |
| H  | 1.53075300  | -0.58687400 | -2.19366900 |
| H  | 3.71165500  | -1.89678800 | -3.49426300 |
| Br | 4.12127500  | -0.94650200 | 3.12256400  |
| O  | 4.16105500  | 1.33070200  | -2.95783700 |
| C  | 3.46299400  | 2.55538000  | -2.97924200 |
| H  | 4.17431900  | 3.35398200  | -2.76880400 |
| H  | 3.00770500  | 2.73335600  | -3.96337300 |
| N  | 1.81380800  | 1.36610600  | -1.54470300 |
| C  | 0.79634900  | 1.66983000  | -0.70437100 |
| C  | 2.38080500  | 2.54666200  | -1.94262700 |
| N  | 1.81284500  | 3.55792700  | -1.36053000 |
| N  | 0.84078100  | 3.00088400  | -0.58174600 |
| C  | 0.09225300  | 3.86283100  | 0.29431300  |
| C  | -0.74904900 | 4.81539600  | -0.28080900 |
| C  | 0.29757800  | 3.74913700  | 1.67241400  |
| C  | -1.42332500 | 5.67333200  | 0.58822600  |
| C  | -0.39935000 | 4.63170600  | 2.49377500  |
| C  | -1.26613600 | 5.59409000  | 1.97158700  |
| H  | -2.09087400 | 6.42154200  | 0.16813300  |
| H  | -0.25934200 | 4.56654100  | 3.56982300  |
| C  | -2.03387700 | 6.51056000  | 2.88846500  |
| H  | -2.96931200 | 6.03918100  | 3.20647200  |
| H  | -1.45881100 | 6.74103800  | 3.78820900  |
| H  | -2.28802000 | 7.44790900  | 2.38899600  |
| C  | 1.21633100  | 2.70939600  | 2.25895900  |
| H  | 0.73558800  | 1.72364200  | 2.25373300  |
| H  | 2.15475500  | 2.63294700  | 1.69970400  |
| H  | 1.45888400  | 2.95607700  | 3.29365500  |
| C  | -0.91978300 | 4.92142000  | -1.77301400 |
| H  | -1.83387900 | 5.47005700  | -2.00766800 |
| H  | -0.07691700 | 5.45908400  | -2.21869400 |
| H  | -0.96422900 | 3.93237300  | -2.23908500 |
| C  | -0.99833000 | -1.32924700 | 0.97943800  |
| C  | -0.16490100 | -0.59704000 | -0.06205800 |
| H  | -1.97763800 | -1.61985500 | 0.58064800  |
| C  | -0.25080100 | 0.80988600  | -0.04477000 |
| O  | -1.24911900 | 1.42221900  | 0.37871900  |
| C  | -0.28257600 | -2.54872500 | 1.51351400  |
| C  | -0.76420600 | -3.83584000 | 1.27298900  |
| C  | 0.90748000  | -2.40718000 | 2.23626500  |

|         |             |             |             |
|---------|-------------|-------------|-------------|
| C       | -0.07315100 | -4.95531600 | 1.73396800  |
| H       | -1.67922700 | -3.96110400 | 0.70019600  |
| C       | 1.60663300  | -3.52063800 | 2.69186500  |
| H       | 1.29026100  | -1.41067800 | 2.44837900  |
| C       | 1.11614100  | -4.80204700 | 2.44122300  |
| H       | -0.46248100 | -5.94822300 | 1.52902900  |
| H       | 2.53685800  | -3.38125400 | 3.23409800  |
| H       | 1.65949800  | -5.67293200 | 2.79410500  |
| H       | 0.76932700  | -1.07655300 | -0.33071300 |
| H       | -1.20754200 | -0.62361100 | 1.79288000  |
| C       | -1.34096900 | -0.92811900 | -1.89337300 |
| C       | -2.39995300 | -0.01267700 | -1.79528400 |
| H       | -0.54480000 | -0.55140600 | -2.53066400 |
| C       | -2.09607200 | 1.33814200  | -2.20593600 |
| H       | -2.90498300 | 2.07892600  | -2.07394800 |
| O       | -1.00301200 | 1.68094200  | -2.67254100 |
| C       | -1.43207000 | -2.40795800 | -1.87154700 |
| C       | -0.25666200 | -3.15660700 | -2.04001600 |
| C       | -2.64327600 | -3.10311900 | -1.75421100 |
| C       | -0.28067500 | -4.54381400 | -2.07271800 |
| H       | 0.69623800  | -2.64117100 | -2.13812000 |
| C       | -2.67027200 | -4.49663600 | -1.79467600 |
| H       | -3.57104200 | -2.55383100 | -1.65326000 |
| C       | -1.49270000 | -5.22261300 | -1.94608700 |
| H       | 0.64505100  | -5.09658000 | -2.19484400 |
| H       | -3.62107800 | -5.01338300 | -1.70940500 |
| H       | -1.51679000 | -6.30722500 | -1.97211100 |
| C       | -3.64788400 | -0.23780200 | -1.15890000 |
| C       | -4.72996100 | -0.38826900 | -0.62292000 |
| C       | -5.97712400 | -0.63272200 | 0.02933100  |
| C       | -6.22937900 | -1.88699500 | 0.61118500  |
| C       | -6.96407600 | 0.36356200  | 0.10176300  |
| C       | -7.44009900 | -2.13435600 | 1.24609100  |
| H       | -5.46430500 | -2.65572000 | 0.56049900  |
| C       | -8.17180300 | 0.10708200  | 0.74001300  |
| H       | -6.77098800 | 1.33334300  | -0.34457300 |
| C       | -8.41570300 | -1.14016300 | 1.31329000  |
| H       | -7.62285600 | -3.10666500 | 1.69229200  |
| H       | -8.92661900 | 0.88525300  | 0.79064800  |
| H       | -9.35986800 | -1.33600800 | 1.81060400  |
| TS4C-RS |             |             |             |
| C       | -3.73599400 | -1.38864400 | 3.47183500  |
| C       | -3.43670200 | -0.83604900 | 2.22361500  |

|    |             |             |             |
|----|-------------|-------------|-------------|
| C  | -3.74747500 | -1.48567100 | 1.04078200  |
| C  | -4.38438700 | -2.71839700 | 1.15061400  |
| C  | -4.68735000 | -3.29834300 | 2.37673200  |
| C  | -4.35738300 | -2.62622300 | 3.55468000  |
| C  | -3.29191800 | -0.46401500 | 4.58386600  |
| C  | -3.13342000 | 0.87678600  | 3.86165900  |
| C  | -2.69688000 | 0.46274300  | 2.43872300  |
| H  | -3.54066900 | -1.06400400 | 0.06150500  |
| H  | -5.18327800 | -4.26159700 | 2.40948300  |
| H  | -4.60013600 | -3.06620400 | 4.51680500  |
| H  | -4.01347800 | -0.37794200 | 5.39908500  |
| H  | -2.41666400 | 1.56737200  | 4.32602000  |
| H  | -1.60933900 | 0.32868700  | 2.38598600  |
| H  | -2.33256800 | -0.78229100 | 5.00792400  |
| Br | -4.83571900 | -3.64458000 | -0.43821500 |
| O  | -4.42718900 | 1.45484600  | 3.81110600  |
| C  | -4.49627300 | 2.69301600  | 3.14581100  |
| H  | -5.55016300 | 2.92020700  | 2.99058200  |
| H  | -4.02793900 | 3.49004400  | 3.74030900  |
| N  | -3.00268800 | 1.55709000  | 1.52128200  |
| C  | -2.44223800 | 1.82212500  | 0.34434500  |
| C  | -3.80415400 | 2.62137500  | 1.81982800  |
| N  | -3.74629500 | 3.53078600  | 0.88537600  |
| N  | -2.88937500 | 3.00554100  | -0.03614300 |
| C  | -2.34454600 | 3.77388200  | -1.12777000 |
| C  | -2.84882000 | 3.61297700  | -2.41785200 |
| C  | -1.27581700 | 4.63248600  | -0.82226200 |
| C  | -2.16795600 | 4.26766300  | -3.44978200 |
| C  | -0.63444700 | 5.25510800  | -1.88820600 |
| C  | -1.05117700 | 5.06292600  | -3.21018900 |
| H  | -2.52818100 | 4.14144000  | -4.46784500 |
| H  | 0.21158500  | 5.90683600  | -1.68551500 |
| C  | -0.30004600 | 5.70729300  | -4.34521700 |
| H  | -0.02993300 | 6.73844000  | -4.10240100 |
| H  | 0.63287100  | 5.16783000  | -4.54036500 |
| H  | -0.89234900 | 5.70819200  | -5.26236200 |
| C  | -0.89098300 | 4.94756700  | 0.60107600  |
| H  | -1.57909300 | 5.69586600  | 1.00770600  |
| H  | -0.92650000 | 4.07657300  | 1.26035200  |
| H  | 0.11840900  | 5.36421300  | 0.63468100  |
| C  | -4.10145500 | 2.83481500  | -2.71437400 |
| H  | -4.35274100 | 2.11509300  | -1.93546500 |
| H  | -4.94303700 | 3.53017300  | -2.80336100 |
| H  | -4.00520500 | 2.31298800  | -3.66954800 |

|   |             |             |             |
|---|-------------|-------------|-------------|
| H | -1.72918200 | 1.20784100  | -0.18861100 |
| B | -6.09469000 | 0.63866100  | 0.14913000  |
| F | -4.80580200 | 0.80494400  | -0.43089500 |
| F | -7.00266200 | 1.43051900  | -0.54752300 |
| F | -6.01935100 | 1.04915100  | 1.48832000  |
| F | -6.45197500 | -0.70655600 | 0.07410700  |
| N | -2.71611100 | -1.76807100 | -2.54740300 |
| C | -1.61862900 | -2.61563800 | -3.00311700 |
| C | -1.97597200 | -4.09925300 | -3.03154400 |
| H | -0.78334900 | -2.45242700 | -2.31114000 |
| H | -1.25260200 | -2.32010600 | -4.00470700 |
| H | -1.06564600 | -4.70356000 | -3.09453600 |
| H | -2.52297300 | -4.37792900 | -2.12650700 |
| H | -2.59531400 | -4.35350300 | -3.89564800 |
| C | -3.90849500 | -1.93203600 | -3.37661100 |
| C | -5.06102800 | -1.02543600 | -2.96976300 |
| H | -4.23723900 | -2.97091100 | -3.26844400 |
| H | -3.67330700 | -1.78809500 | -4.44930200 |
| H | -5.95591400 | -1.30421900 | -3.53382000 |
| H | -5.27631900 | -1.12269000 | -1.90323400 |
| H | -4.85357100 | 0.02869400  | -3.17569400 |
| C | -2.28224300 | -0.37722900 | -2.40386400 |
| C | -1.89719900 | 0.35775900  | -3.69065900 |
| H | -1.40962100 | -0.39280400 | -1.73663500 |
| H | -3.08243700 | 0.16870100  | -1.88917700 |
| H | -1.59742900 | 1.38423800  | -3.45404400 |
| H | -1.04973300 | -0.12017300 | -4.18983800 |
| H | -2.73514000 | 0.40291000  | -4.39507800 |
| C | 1.56834100  | 1.37246500  | -1.25745200 |
| C | 0.80121300  | 1.02825000  | -0.13322200 |
| H | 1.73934100  | 2.44505700  | -1.33343300 |
| C | 0.57521300  | 2.05482200  | 0.85014800  |
| H | 1.00151300  | 3.03780000  | 0.57769900  |
| O | -0.09130300 | 1.93107500  | 1.88300900  |
| C | 1.53275800  | 0.69657600  | -2.57538400 |
| C | 1.52287600  | 1.50068600  | -3.72418400 |
| C | 1.51650100  | -0.69442400 | -2.73558600 |
| C | 1.53126700  | 0.93137900  | -4.99426600 |
| H | 1.50370400  | 2.58123800  | -3.61345200 |
| C | 1.53722600  | -1.26483200 | -4.00405600 |
| H | 1.48054500  | -1.33696500 | -1.86601200 |
| C | 1.55344000  | -0.45474100 | -5.13897800 |
| H | 1.52230000  | 1.57270100  | -5.87003800 |
| H | 1.53569200  | -2.34765000 | -4.08940400 |

|    |             |             |             |
|----|-------------|-------------|-------------|
| H  | 1.57268900  | -0.90069200 | -6.12819300 |
| C  | 0.39264100  | -0.30158700 | 0.16216000  |
| C  | 0.06929300  | -1.44051100 | 0.44823200  |
| C  | -0.19082300 | -2.80945700 | 0.78625500  |
| C  | 0.73283700  | -3.52044900 | 1.56738200  |
| C  | -1.31906300 | -3.46451100 | 0.27711200  |
| C  | 0.53256700  | -4.87135200 | 1.82414700  |
| H  | 1.61334800  | -3.01088700 | 1.94820000  |
| C  | -1.52068200 | -4.81254000 | 0.55470700  |
| H  | -2.02022000 | -2.91838700 | -0.34979800 |
| C  | -0.59403800 | -5.51952500 | 1.31889100  |
| H  | 1.25607100  | -5.42017500 | 2.41821200  |
| H  | -2.41683200 | -5.29898300 | 0.17996900  |
| H  | -0.75113000 | -6.57330000 | 1.52525400  |
| C  | 5.88931000  | -3.25145700 | -1.12054700 |
| C  | 4.91521900  | -2.39845900 | -0.59308200 |
| C  | 3.56122500  | -2.63380900 | -0.77019400 |
| C  | 3.20617000  | -3.73734700 | -1.54995100 |
| C  | 4.15874600  | -4.56955800 | -2.12803800 |
| C  | 5.51552900  | -4.33180200 | -1.90401200 |
| C  | 7.26277100  | -2.84109900 | -0.63848200 |
| C  | 6.92212900  | -2.01398800 | 0.60355600  |
| C  | 5.61810800  | -1.30071400 | 0.18047600  |
| H  | 2.80071200  | -2.00477100 | -0.31130200 |
| H  | 3.83974900  | -5.41500700 | -2.72641600 |
| H  | 6.25929500  | -5.00418200 | -2.31906700 |
| H  | 7.90367900  | -3.68619900 | -0.38045200 |
| H  | 7.70540700  | -1.31633400 | 0.92349000  |
| H  | 5.84455200  | -0.43974100 | -0.45602800 |
| H  | 7.78475600  | -2.21942200 | -1.37398200 |
| Br | 1.37210300  | -4.13186000 | -1.81472500 |
| O  | 6.61759800  | -2.94614100 | 1.63025300  |
| C  | 6.20853600  | -2.35617900 | 2.83889400  |
| H  | 5.81834100  | -3.14694900 | 3.48093600  |
| H  | 7.05033000  | -1.87094400 | 3.35184300  |
| N  | 4.91347000  | -0.79889800 | 1.36208900  |
| C  | 4.06434500  | 0.25111300  | 1.51102500  |
| C  | 5.15525800  | -1.31175600 | 2.60563000  |
| N  | 4.48899800  | -0.66022700 | 3.51312000  |
| N  | 3.82367400  | 0.30739800  | 2.82848700  |
| C  | 3.02965600  | 1.22474500  | 3.62059700  |
| C  | 3.62931900  | 2.40573700  | 4.06857300  |
| C  | 1.76488300  | 0.80506800  | 4.02166900  |
| C  | 2.86660500  | 3.22483900  | 4.89458400  |

|   |             |             |             |
|---|-------------|-------------|-------------|
| C | 1.04500400  | 1.66039600  | 4.85591800  |
| C | 1.56887000  | 2.87650700  | 5.28461100  |
| H | 3.29968600  | 4.15580100  | 5.25174700  |
| H | 0.04973000  | 1.35963800  | 5.17379200  |
| C | 0.75352600  | 3.80812300  | 6.14259500  |
| H | 0.27180500  | 4.57244200  | 5.52432200  |
| H | -0.03201000 | 3.26891000  | 6.67636300  |
| H | 1.38034600  | 4.32377500  | 6.87395700  |
| C | 1.21937100  | -0.52721000 | 3.59650200  |
| H | 1.25975000  | -0.63724300 | 2.51100100  |
| H | 1.79230300  | -1.34408200 | 4.04881700  |
| H | 0.17594000  | -0.63211500 | 3.90053700  |
| C | 5.03917900  | 2.76247600  | 3.68666700  |
| H | 5.72314700  | 1.93112700  | 3.88620500  |
| H | 5.08989900  | 2.99723800  | 2.62060900  |
| H | 5.38141200  | 3.62810200  | 4.25567500  |
| C | 4.35389900  | 2.00728200  | -1.91574200 |
| C | 3.72355100  | 1.08904100  | -0.86504900 |
| H | 4.32249600  | 1.44460000  | -2.85437800 |
| C | 3.72336900  | 1.35964000  | 0.51910600  |
| O | 3.41574100  | 2.42322400  | 1.08149600  |
| C | 3.84982700  | 3.41030600  | -2.23110300 |
| C | 3.86108800  | 3.81713300  | -3.57162900 |
| C | 3.45220200  | 4.34118800  | -1.26538100 |
| C | 3.47548200  | 5.10209000  | -3.94332900 |
| H | 4.16219400  | 3.10684800  | -4.33818800 |
| C | 3.05864500  | 5.62689700  | -1.63578600 |
| H | 3.43715200  | 4.04676600  | -0.22237900 |
| C | 3.06588500  | 6.01482800  | -2.97296900 |
| H | 3.48814500  | 5.38730800  | -4.99096000 |
| H | 2.74773700  | 6.33018000  | -0.86817900 |
| H | 2.75649000  | 7.01585500  | -3.25740100 |
| H | 3.85556100  | 0.04217700  | -1.12803300 |
| H | 5.42244600  | 2.10358900  | -1.67231200 |

TS4C-SS

|   |             |             |             |
|---|-------------|-------------|-------------|
| C | -6.10900300 | -1.97407600 | 2.39436500  |
| C | -5.24010800 | -1.26411700 | 1.56086800  |
| C | -4.91077400 | -1.72101200 | 0.29142700  |
| C | -5.50735800 | -2.91125600 | -0.11693500 |
| C | -6.39414200 | -3.62321600 | 0.68398800  |
| C | -6.69707600 | -3.15215600 | 1.95875500  |
| C | -6.26419000 | -1.28246400 | 3.72707000  |
| C | -5.82565800 | 0.14371200  | 3.40356400  |

|    |             |             |             |
|----|-------------|-------------|-------------|
| C  | -4.72819500 | -0.05985200 | 2.33027100  |
| H  | -4.23506600 | -1.19528000 | -0.37788200 |
| H  | -6.83773900 | -4.53935800 | 0.31120700  |
| H  | -7.38487500 | -3.70025400 | 2.59514900  |
| H  | -7.28333600 | -1.29516800 | 4.11885500  |
| H  | -5.46403900 | 0.72128200  | 4.26407300  |
| H  | -3.76633600 | -0.28612400 | 2.80405300  |
| H  | -5.59384600 | -1.72566700 | 4.47286400  |
| Br | -5.06906400 | -3.63122000 | -1.81422400 |
| O  | -6.95042600 | 0.77371700  | 2.81249800  |
| C  | -6.72614000 | 2.10397600  | 2.41319000  |
| H  | -7.58520100 | 2.42460700  | 1.82742100  |
| H  | -6.59784700 | 2.76186500  | 3.28475000  |
| N  | -4.56255900 | 1.19058900  | 1.58855900  |
| C  | -3.53076400 | 1.60649900  | 0.84679500  |
| C  | -5.49404500 | 2.19183800  | 1.56898600  |
| N  | -5.07450700 | 3.20442800  | 0.86606100  |
| N  | -3.84848700 | 2.81747000  | 0.41802400  |
| C  | -3.01714100 | 3.76051800  | -0.28529100 |
| C  | -3.30508900 | 4.06062000  | -1.61673400 |
| C  | -2.00523400 | 4.39219100  | 0.44684700  |
| C  | -2.50527500 | 5.02664200  | -2.23365200 |
| C  | -1.25279300 | 5.35908200  | -0.21157400 |
| C  | -1.48544100 | 5.68692500  | -1.55068500 |
| H  | -2.70536700 | 5.27876100  | -3.27230800 |
| H  | -0.47915300 | 5.88125600  | 0.34500600  |
| C  | -0.64921500 | 6.73594900  | -2.23833500 |
| H  | -0.29174400 | 7.48325200  | -1.52517700 |
| H  | 0.22840700  | 6.28702400  | -2.71636900 |
| H  | -1.21962900 | 7.24772900  | -3.01645400 |
| C  | -1.73785500 | 4.04676000  | 1.88620100  |
| H  | -2.66274100 | 4.01267500  | 2.47044000  |
| H  | -1.24989200 | 3.06953100  | 1.94641600  |
| H  | -1.07494200 | 4.78775300  | 2.33611500  |
| C  | -4.44124000 | 3.41711200  | -2.36425700 |
| H  | -4.77423500 | 2.48276700  | -1.91257500 |
| H  | -5.30507500 | 4.08985100  | -2.38639800 |
| H  | -4.14607400 | 3.22634200  | -3.39974000 |
| H  | -2.57724000 | 1.10980000  | 0.67452700  |
| B  | -6.89654900 | 0.75129600  | -1.22444400 |
| F  | -5.51428200 | 0.80108200  | -0.90730600 |
| F  | -7.11514200 | 1.50672800  | -2.37705300 |
| F  | -7.61096800 | 1.29876500  | -0.14716400 |
| F  | -7.27159600 | -0.57506900 | -1.42169400 |



|   |             |             |             |
|---|-------------|-------------|-------------|
| N | -2.77569200 | -1.20966600 | -2.65443700 |
| C | -1.52285800 | -1.93924200 | -2.83238000 |
| C | -1.65474000 | -3.44079400 | -2.60938300 |
| H | -0.80423600 | -1.55200600 | -2.10522200 |
| H | -1.08590600 | -1.74979600 | -3.83217000 |
| H | -0.68628300 | -3.92671500 | -2.76569900 |
| H | -1.97981800 | -3.63485600 | -1.58406200 |
| H | -2.38365900 | -3.89783100 | -3.28526800 |
| C | -3.58212200 | -1.24385600 | -3.86941300 |
| C | -4.93597000 | -0.56375200 | -3.72615200 |
| H | -3.74447700 | -2.29983800 | -4.11871900 |
| H | -3.03153400 | -0.80786600 | -4.72657200 |
| H | -5.52876500 | -0.73584200 | -4.62977800 |
| H | -5.48538400 | -0.95925700 | -2.86900600 |
| H | -4.84919700 | 0.51771200  | -3.58974100 |
| C | -2.56118900 | 0.13194600  | -2.11542200 |
| C | -1.74197600 | 1.09300800  | -2.98131400 |
| H | -2.04930000 | -0.00038100 | -1.15663700 |
| H | -3.53957300 | 0.56831200  | -1.89106900 |
| H | -1.60725200 | 2.04329700  | -2.45434000 |
| H | -0.74678200 | 0.68250000  | -3.19110500 |
| H | -2.23554500 | 1.29676100  | -3.93770000 |
| C | 1.50850700  | -1.04432600 | -0.81347600 |
| C | 0.42678000  | -0.44043600 | -0.15229600 |
| H | 1.94315800  | -0.40854300 | -1.58562100 |
| C | 0.22436700  | 0.97844800  | -0.31751400 |
| H | 0.95368500  | 1.47559700  | -0.98532600 |
| O | -0.70324300 | 1.62940700  | 0.16509800  |
| C | 1.59788700  | -2.48214200 | -1.17133500 |
| C | 2.01969300  | -2.80984200 | -2.46849900 |
| C | 1.27174100  | -3.52367000 | -0.29184700 |
| C | 2.13337600  | -4.13615800 | -2.87519200 |
| H | 2.23558200  | -2.00931200 | -3.17381200 |
| C | 1.38385800  | -4.84929600 | -0.70044900 |
| H | 0.93160100  | -3.29501700 | 0.71117000  |
| C | 1.81935600  | -5.16245000 | -1.98722600 |
| H | 2.45685200  | -4.36463500 | -3.88571400 |
| H | 1.13021300  | -5.64366700 | -0.00607200 |
| H | 1.90625500  | -6.19851800 | -2.29704400 |
| C | -0.49798100 | -1.16106400 | 0.65669300  |
| C | -1.28932900 | -1.79399900 | 1.33072500  |
| C | -2.11911400 | -2.58769200 | 2.19020700  |
| C | -2.21244500 | -2.27915000 | 3.55667900  |
| C | -2.83376000 | -3.68563500 | 1.68488200  |

|    |             |             |             |
|----|-------------|-------------|-------------|
| C  | -3.01276900 | -3.04743000 | 4.39662200  |
| H  | -1.64793500 | -1.43794400 | 3.94756600  |
| C  | -3.62068500 | -4.45518200 | 2.53255700  |
| H  | -2.80133000 | -3.90222100 | 0.62104400  |
| C  | -3.71633300 | -4.13747500 | 3.88713500  |
| H  | -3.07965600 | -2.79971700 | 5.45140200  |
| H  | -4.17864500 | -5.29418500 | 2.12989500  |
| H  | -4.34070300 | -4.73609900 | 4.54274000  |
| C  | 6.80191700  | -2.48237700 | -2.18509700 |
| C  | 6.17395200  | -1.57188300 | -1.33227500 |
| C  | 6.59486900  | -1.38772100 | -0.02304800 |
| C  | 7.65837100  | -2.17197200 | 0.41936000  |
| C  | 8.28617900  | -3.10134900 | -0.40392100 |
| C  | 7.85704600  | -3.25547100 | -1.72203600 |
| C  | 6.17945400  | -2.43440200 | -3.56141500 |
| C  | 5.48158400  | -1.07282300 | -3.55886900 |
| C  | 5.03157700  | -0.92013100 | -2.08738200 |
| H  | 6.12655900  | -0.67365600 | 0.64742600  |
| H  | 9.11126600  | -3.68997200 | -0.02032600 |
| H  | 8.35670900  | -3.96367500 | -2.37478700 |
| H  | 6.90400000  | -2.49654600 | -4.37555500 |
| H  | 4.64433100  | -0.99216500 | -4.26351400 |
| H  | 4.09675000  | -1.46787800 | -1.93726100 |
| H  | 5.44076100  | -3.23342300 | -3.69086300 |
| Br | 8.26992300  | -1.96333200 | 2.20164900  |
| O  | 6.47366200  | -0.10166900 | -3.84796400 |
| C  | 5.97411100  | 1.21359700  | -3.85063200 |
| H  | 6.81555000  | 1.89537800  | -3.97687800 |
| H  | 5.26517600  | 1.36932800  | -4.67592600 |
| N  | 4.78414200  | 0.49123000  | -1.77576800 |
| C  | 4.09866300  | 1.06767400  | -0.75703900 |
| C  | 5.26989700  | 1.50447400  | -2.55907100 |
| N  | 4.94704500  | 2.66656700  | -2.07344900 |
| N  | 4.22258600  | 2.38208900  | -0.95750100 |
| C  | 3.74835000  | 3.48480800  | -0.15830700 |
| C  | 2.77413700  | 4.31178600  | -0.70812300 |
| C  | 4.32875000  | 3.69935300  | 1.09827600  |
| C  | 2.39465800  | 5.42841200  | 0.04043200  |
| C  | 3.89893700  | 4.81482900  | 1.80741400  |
| C  | 2.93716000  | 5.69268000  | 1.29381400  |
| H  | 1.65271000  | 6.10315500  | -0.37929100 |
| H  | 4.32615900  | 5.00688200  | 2.78849100  |
| C  | 2.48033900  | 6.87936200  | 2.10129200  |
| H  | 1.83273200  | 6.55691400  | 2.92285000  |

|   |            |             |             |
|---|------------|-------------|-------------|
| H | 3.32971700 | 7.40703900  | 2.54240700  |
| H | 1.91704300 | 7.58396900  | 1.48569900  |
| C | 5.33637100 | 2.74425000  | 1.68012700  |
| H | 4.83267600 | 1.84158600  | 2.04883900  |
| H | 6.08683000 | 2.44275400  | 0.94212900  |
| H | 5.85499300 | 3.20481600  | 2.52247300  |
| C | 2.11552500 | 4.03925400  | -2.03559200 |
| H | 2.29051500 | 3.02075800  | -2.38732600 |
| H | 1.03434100 | 4.18209400  | -1.94074400 |
| H | 2.48537400 | 4.72397800  | -2.80506500 |
| C | 2.71371900 | -1.37462500 | 1.88705400  |
| C | 3.22235000 | -0.91341700 | 0.53765400  |
| H | 2.79582600 | -2.46384500 | 1.95073300  |
| C | 3.27677200 | 0.47955200  | 0.36119400  |
| O | 2.55443800 | 1.28422300  | 0.97501600  |
| C | 3.50658800 | -0.72206300 | 3.00496900  |
| C | 4.84089500 | -1.07270100 | 3.23408300  |
| C | 2.94349800 | 0.29870300  | 3.77394200  |
| C | 5.59597400 | -0.41694500 | 4.20318700  |
| H | 5.29769400 | -1.86735300 | 2.64595700  |
| C | 3.69241300 | 0.95198500  | 4.75093900  |
| H | 1.91700100 | 0.59522300  | 3.58129800  |
| C | 5.02222700 | 0.59832600  | 4.96703300  |
| H | 6.63244300 | -0.69986000 | 4.35710800  |
| H | 3.23824800 | 1.74590300  | 5.33588900  |
| H | 5.60881000 | 1.11064300  | 5.72301200  |
| H | 3.95693100 | -1.55154700 | 0.06279700  |
| H | 1.65784200 | -1.10609400 | 1.99843600  |

TS4C-RR

|   |             |             |             |
|---|-------------|-------------|-------------|
| C | -1.09717300 | -4.17117700 | 1.08131200  |
| C | -1.49958200 | -2.85453000 | 0.85210000  |
| C | -1.29949400 | -2.23612000 | -0.37794400 |
| C | -0.66868900 | -2.98607400 | -1.36647500 |
| C | -0.27630500 | -4.30881100 | -1.16651300 |
| C | -0.49012400 | -4.90753800 | 0.07116400  |
| C | -1.38798700 | -4.60011800 | 2.49771000  |
| C | -2.30975500 | -3.50029800 | 3.03650000  |
| C | -2.00072200 | -2.26267300 | 2.15093400  |
| H | -1.62331600 | -1.22339700 | -0.60966300 |
| H | 0.19004900  | -4.86081600 | -1.97588900 |
| H | -0.19077200 | -5.93749800 | 0.23693000  |
| H | -1.89542800 | -5.56583500 | 2.56123400  |
| H | -2.14738000 | -3.27878700 | 4.09975200  |

|    |             |             |             |
|----|-------------|-------------|-------------|
| H  | -1.21448700 | -1.64128300 | 2.59211100  |
| H  | -0.46943400 | -4.67147200 | 3.09007000  |
| Br | -0.29302300 | -2.17079700 | -3.02761200 |
| O  | -3.64070900 | -3.93796700 | 2.84061700  |
| C  | -4.58602000 | -3.01657600 | 3.33313000  |
| H  | -5.57752800 | -3.40268000 | 3.11065400  |
| H  | -4.46442900 | -2.86761800 | 4.41571700  |
| N  | -3.18768200 | -1.40896700 | 2.06429200  |
| C  | -3.33082700 | -0.21992300 | 1.47188100  |
| C  | -4.40055900 | -1.71754400 | 2.61744200  |
| N  | -5.25761600 | -0.75601900 | 2.43482700  |
| N  | -4.57148200 | 0.16841500  | 1.70970100  |
| C  | -5.17302700 | 1.42294200  | 1.35700000  |
| C  | -6.36580000 | 1.39205100  | 0.62472000  |
| C  | -4.56722700 | 2.60287100  | 1.80241100  |
| C  | -6.96002000 | 2.61915700  | 0.33920000  |
| C  | -5.21032600 | 3.79964500  | 1.48436800  |
| C  | -6.39983300 | 3.82771500  | 0.75933800  |
| H  | -7.88296200 | 2.62837400  | -0.23617400 |
| H  | -4.76472200 | 4.73325900  | 1.81446800  |
| C  | -7.07617100 | 5.13200200  | 0.42814600  |
| H  | -8.12206500 | 5.12137900  | 0.74751700  |
| H  | -6.57236300 | 5.97143900  | 0.91162800  |
| H  | -7.06348100 | 5.30916700  | -0.65197100 |
| C  | -3.29529000 | 2.60937400  | 2.61355200  |
| H  | -3.33733100 | 1.87823200  | 3.42772000  |
| H  | -2.41130700 | 2.37475200  | 2.00904800  |
| H  | -3.14398700 | 3.59794600  | 3.05070100  |
| C  | -6.96527300 | 0.09968200  | 0.14024900  |
| H  | -6.20575700 | -0.58833000 | -0.23810200 |
| H  | -7.48151300 | -0.42317900 | 0.95050000  |
| H  | -7.68512300 | 0.29711300  | -0.65665600 |
| H  | -2.56211800 | 0.35001200  | 0.96491700  |
| B  | -5.54499800 | -3.22440800 | -0.28072500 |
| F  | -4.57298500 | -2.21094900 | -0.09734200 |
| F  | -6.57491600 | -2.71450500 | -1.08302700 |
| F  | -6.06689600 | -3.58052700 | 0.97252100  |
| F  | -4.95710600 | -4.32701800 | -0.89009300 |
| N  | -2.93634500 | -0.11311700 | -2.92124100 |
| C  | -2.03655600 | 0.86578900  | -3.51692300 |
| C  | -2.54335800 | 1.72452600  | -4.68556900 |
| H  | -1.14954800 | 0.31870200  | -3.86333400 |
| H  | -1.68574100 | 1.51765300  | -2.71004100 |
| H  | -1.69716800 | 2.25975300  | -5.12742700 |

|   |             |             |             |
|---|-------------|-------------|-------------|
| H | -2.99329500 | 1.10949900  | -5.47080900 |
| H | -3.27929900 | 2.47231300  | -4.37859500 |
| C | -3.45268900 | -1.07859500 | -3.88203100 |
| C | -4.01455900 | -2.32277000 | -3.20913700 |
| H | -2.61178800 | -1.36467400 | -4.52531000 |
| H | -4.21852500 | -0.64147100 | -4.54811900 |
| H | -4.27724300 | -3.07073300 | -3.96351600 |
| H | -3.27252000 | -2.75388400 | -2.53189600 |
| H | -4.91054000 | -2.11192600 | -2.62108400 |
| C | -3.93909600 | 0.42389900  | -2.00553300 |
| C | -5.19784900 | 1.03067700  | -2.64319900 |
| H | -3.43370600 | 1.17718300  | -1.38419900 |
| H | -4.24572800 | -0.38437500 | -1.32998500 |
| H | -5.77759300 | 1.57226200  | -1.89114200 |
| H | -4.95591400 | 1.73170700  | -3.44591900 |
| H | -5.83936400 | 0.24944500  | -3.06388200 |
| C | 1.40800100  | 0.64969300  | -1.12421100 |
| C | 0.36600500  | 0.99362700  | -0.23267400 |
| H | 1.79519800  | -0.35568600 | -0.95250500 |
| C | 0.24651700  | 0.22935000  | 0.97892400  |
| H | 1.00667900  | -0.56923200 | 1.08866200  |
| O | -0.63088500 | 0.35400500  | 1.84051200  |
| C | 1.48197900  | 1.01873600  | -2.56198000 |
| C | 2.13085600  | 0.13275500  | -3.43436900 |
| C | 0.94308700  | 2.19805800  | -3.09500600 |
| C | 2.22425400  | 0.40202600  | -4.79507000 |
| H | 2.53592300  | -0.79615300 | -3.04311500 |
| C | 1.04974600  | 2.47452200  | -4.45541200 |
| H | 0.43454600  | 2.90150000  | -2.44657700 |
| C | 1.68223500  | 1.57706500  | -5.31257700 |
| H | 2.71752700  | -0.30833600 | -5.45075700 |
| H | 0.62972600  | 3.39623100  | -4.84597100 |
| H | 1.75466400  | 1.79259500  | -6.37365700 |
| C | -0.54699500 | 2.07537200  | -0.37349400 |
| C | -1.37226000 | 2.96925800  | -0.42286500 |
| C | -2.29731400 | 4.06153900  | -0.52748800 |
| C | -3.29850000 | 4.05773400  | -1.51129900 |
| C | -2.19186100 | 5.16209000  | 0.33726200  |
| C | -4.17181400 | 5.13273400  | -1.62645600 |
| H | -3.37972900 | 3.20850600  | -2.18220500 |
| C | -3.06256300 | 6.23910600  | 0.20935500  |
| H | -1.41547600 | 5.16398700  | 1.09568900  |
| C | -4.05374800 | 6.22762200  | -0.77131800 |
| H | -4.94353800 | 5.11674600  | -2.39016700 |

|    |             |             |             |
|----|-------------|-------------|-------------|
| H  | -2.96736000 | 7.08971400  | 0.87683700  |
| H  | -4.73263300 | 7.06892800  | -0.86877000 |
| C  | 6.89670800  | -1.06725000 | -1.70741200 |
| C  | 5.79125600  | -0.66802000 | -0.96030700 |
| C  | 4.58841100  | -1.34360200 | -1.01089200 |
| C  | 4.49185200  | -2.43423500 | -1.86537000 |
| C  | 5.56006100  | -2.83038700 | -2.66364200 |
| C  | 6.77605700  | -2.14253000 | -2.57977100 |
| C  | 8.09753500  | -0.23284800 | -1.31326400 |
| C  | 7.70499200  | 0.26458600  | 0.08808000  |
| C  | 6.17222800  | 0.46419000  | -0.03583500 |
| H  | 3.74304800  | -1.06504200 | -0.39187100 |
| H  | 5.45741900  | -3.68397100 | -3.32360700 |
| H  | 7.62185800  | -2.47723700 | -3.17137800 |
| H  | 9.03041800  | -0.79783100 | -1.26909300 |
| H  | 8.22151000  | 1.17679100  | 0.40851500  |
| H  | 5.94153900  | 1.45738300  | -0.43529900 |
| H  | 8.23791200  | 0.61659800  | -1.99013700 |
| Br | 2.83650600  | -3.35205600 | -1.86585700 |
| O  | 7.98435200  | -0.80748700 | 0.97533600  |
| C  | 7.56173500  | -0.57105800 | 2.29898400  |
| H  | 7.79359200  | -1.45522900 | 2.89226000  |
| H  | 8.07608200  | 0.29750000  | 2.73298300  |
| N  | 5.49424100  | 0.31253800  | 1.25370900  |
| C  | 4.17868000  | 0.45476900  | 1.54801500  |
| C  | 6.08494600  | -0.32162500 | 2.31169700  |
| N  | 5.21410400  | -0.58991600 | 3.24076400  |
| N  | 4.03933900  | -0.10532800 | 2.75310500  |
| C  | 2.81872600  | -0.37512100 | 3.46981900  |
| C  | 2.40235400  | 0.54198300  | 4.43591700  |
| C  | 2.15434100  | -1.57143600 | 3.19293000  |
| C  | 1.22201300  | 0.25477900  | 5.11419200  |
| C  | 0.99382700  | -1.82062000 | 3.92553700  |
| C  | 0.49978300  | -0.91283600 | 4.86184500  |
| H  | 0.85866300  | 0.95870600  | 5.85783700  |
| H  | 0.46878700  | -2.75830800 | 3.76236100  |
| C  | -0.80147300 | -1.17867200 | 5.57081200  |
| H  | -0.88599900 | -0.58681400 | 6.48409500  |
| H  | -1.64681700 | -0.90827700 | 4.92513800  |
| H  | -0.90275600 | -2.23503700 | 5.83411700  |
| C  | 2.63790500  | -2.55657300 | 2.15564100  |
| H  | 2.23495800  | -2.33532400 | 1.15810600  |
| H  | 3.72866400  | -2.57366500 | 2.08030100  |
| H  | 2.30203800  | -3.56369800 | 2.41193400  |

|   |            |            |             |
|---|------------|------------|-------------|
| C | 3.19914500 | 1.78679200 | 4.70824500  |
| H | 4.22783300 | 1.54034600 | 4.98881000  |
| H | 3.23002000 | 2.40788800 | 3.80816900  |
| H | 2.74912600 | 2.36082100 | 5.51923000  |
| C | 2.85548800 | 3.11603600 | -0.79885500 |
| C | 3.18005200 | 1.66509400 | -0.48321000 |
| H | 1.85620000 | 3.35474100 | -0.41907100 |
| C | 3.14814300 | 1.35710300 | 0.89659500  |
| O | 2.30539400 | 1.82262300 | 1.68139600  |
| C | 3.88506900 | 4.02031200 | -0.15645500 |
| C | 5.12611200 | 4.22746100 | -0.76857900 |
| C | 3.64643200 | 4.60438400 | 1.09135600  |
| C | 6.11021200 | 4.99197200 | -0.14645200 |
| H | 5.31701300 | 3.78796500 | -1.74593200 |
| C | 4.62906300 | 5.37086200 | 1.71524800  |
| H | 2.68696500 | 4.44169500 | 1.57329100  |
| C | 5.86430400 | 5.56481600 | 1.10071700  |
| H | 7.06564600 | 5.14757800 | -0.63805300 |
| H | 4.42773000 | 5.81954500 | 2.68323500  |
| H | 6.62816000 | 6.16351400 | 1.58628200  |
| H | 3.94015200 | 1.20737100 | -1.10920500 |
| H | 2.85560300 | 3.26399000 | -1.88062900 |

TS4C-SR

|    |            |             |             |
|----|------------|-------------|-------------|
| C  | 1.62459000 | -4.35071700 | 0.50766700  |
| C  | 1.99730200 | -3.02615400 | 0.27009100  |
| C  | 2.25108100 | -2.13352600 | 1.30476300  |
| C  | 2.12587400 | -2.62769000 | 2.60081700  |
| C  | 1.72857200 | -3.93539700 | 2.86535700  |
| C  | 1.47155200 | -4.80775000 | 1.80911500  |
| C  | 1.46534400 | -5.10467700 | -0.79307900 |
| C  | 2.24053000 | -4.23932400 | -1.79255400 |
| C  | 2.05928500 | -2.81204100 | -1.22705800 |
| H  | 2.60728000 | -1.11721700 | 1.15214900  |
| H  | 1.64886600 | -4.27383800 | 3.89193800  |
| H  | 1.18521300 | -5.83504800 | 2.01005200  |
| H  | 1.87151800 | -6.11796400 | -0.76674700 |
| H  | 1.87623900 | -4.31470000 | -2.82615700 |
| H  | 1.13756400 | -2.38314600 | -1.62507000 |
| H  | 0.41025800 | -5.16413900 | -1.08693000 |
| Br | 2.57489100 | -1.51109000 | 4.06379800  |
| O  | 3.59969400 | -4.62247400 | -1.72716800 |
| C  | 4.43576000 | -3.87608000 | -2.58122000 |
| H  | 5.46318600 | -4.16800400 | -2.37434100 |

|   |            |             |             |
|---|------------|-------------|-------------|
| H | 4.19352700 | -4.06758700 | -3.63622800 |
| N | 3.14674500 | -1.95502200 | -1.68673100 |
| C | 3.26754900 | -0.63043000 | -1.59166200 |
| C | 4.27883500 | -2.41257800 | -2.29956100 |
| N | 5.06029800 | -1.42295300 | -2.62743800 |
| N | 4.41371600 | -0.31524400 | -2.17006700 |
| C | 4.95186200 | 1.00062600  | -2.37445500 |
| C | 6.26904900 | 1.25244900  | -1.96322500 |
| C | 4.14350800 | 1.96221600  | -2.99232500 |
| C | 6.77453200 | 2.52629000  | -2.21149700 |
| C | 4.70347200 | 3.22645600  | -3.19680600 |
| C | 6.01110500 | 3.52541300  | -2.81879500 |
| H | 7.79031800 | 2.75035300  | -1.89537900 |
| H | 4.09644000 | 3.99123300  | -3.67578700 |
| C | 6.58547000 | 4.90199100  | -3.02707300 |
| H | 7.56995800 | 4.84896700  | -3.49882600 |
| H | 5.93382900 | 5.51368600  | -3.65439100 |
| H | 6.71097500 | 5.41255700  | -2.06685700 |
| C | 2.72670300 | 1.68712200  | -3.43548700 |
| H | 2.63333100 | 0.71030900  | -3.91915800 |
| H | 2.01435900 | 1.69918500  | -2.60082100 |
| H | 2.41069200 | 2.45158100  | -4.14750900 |
| C | 7.10333800 | 0.22356200  | -1.24911000 |
| H | 6.51496900 | -0.34539400 | -0.52630100 |
| H | 7.52814100 | -0.49529700 | -1.95559800 |
| H | 7.92588800 | 0.71697700  | -0.72740200 |
| H | 2.55595200 | 0.05310700  | -1.15061700 |
| B | 5.69458100 | -2.54957900 | 0.83482400  |
| F | 4.91057000 | -1.46383500 | 0.36344100  |
| F | 7.00361400 | -2.10203900 | 1.02467500  |
| F | 5.67385700 | -3.55684600 | -0.14081000 |
| F | 5.15401000 | -3.02121400 | 2.02844100  |
| N | 3.65015100 | 1.22169700  | 2.34725700  |
| C | 2.46181600 | 1.87296200  | 2.88198600  |
| C | 2.53586400 | 3.38046500  | 3.15093800  |
| H | 2.20114300 | 1.35309300  | 3.81256800  |
| H | 1.63955200 | 1.67854500  | 2.18736200  |
| H | 1.61348600 | 3.71041400  | 3.64050700  |
| H | 3.37643700 | 3.63266100  | 3.80625300  |
| H | 2.63808700 | 3.95042000  | 2.22290600  |
| C | 4.75740700 | 1.16831600  | 3.29093400  |
| C | 5.78835500 | 0.11249400  | 2.91778000  |
| H | 4.32915000 | 0.91281800  | 4.26870400  |
| H | 5.25065400 | 2.14940800  | 3.41690000  |



|   |             |             |             |
|---|-------------|-------------|-------------|
| H | 6.60502000  | 0.11025000  | 3.64642800  |
| H | 5.32501700  | -0.87551800 | 2.89765200  |
| H | 6.22208100  | 0.28736700  | 1.92911000  |
| C | 4.02510200  | 1.62414800  | 0.99305800  |
| C | 4.94759300  | 2.84222400  | 0.84658500  |
| H | 3.08745000  | 1.81778100  | 0.45173700  |
| H | 4.50989900  | 0.76566100  | 0.50914100  |
| H | 5.02335500  | 3.12030500  | -0.20943100 |
| H | 4.57882800  | 3.71029400  | 1.39833900  |
| H | 5.95926100  | 2.61648700  | 1.20115100  |
| C | -0.93640900 | -0.02981700 | 1.39591000  |
| C | -0.27433000 | 0.43230700  | 0.24390200  |
| H | -1.04502100 | -1.11484100 | 1.45595000  |
| C | -0.13860300 | -0.49468200 | -0.84082700 |
| H | -0.53232200 | -1.50984500 | -0.61418000 |
| O | 0.35251200  | -0.26370200 | -1.95364500 |
| C | -0.89388900 | 0.66118000  | 2.69534500  |
| C | -0.55954700 | -0.09535100 | 3.82311800  |
| C | -1.14881100 | 2.03225400  | 2.84239200  |
| C | -0.43000700 | 0.51281500  | 5.06885200  |
| H | -0.35207700 | -1.15583200 | 3.71215200  |
| C | -1.04646000 | 2.63123900  | 4.09079600  |
| H | -1.43657900 | 2.62489100  | 1.97910000  |
| C | -0.67579100 | 1.87545000  | 5.20583300  |
| H | -0.13767200 | -0.08225600 | 5.92800300  |
| H | -1.25198000 | 3.69169900  | 4.19747600  |
| H | -0.58461900 | 2.35104100  | 6.17686300  |
| C | 0.22263700  | 1.75394500  | 0.07742700  |
| C | 0.63713700  | 2.89113400  | -0.04387900 |
| C | 1.19713400  | 4.20531100  | -0.12509200 |
| C | 2.37533100  | 4.41658200  | -0.85529800 |
| C | 0.61040700  | 5.28064200  | 0.56090500  |
| C | 2.95656900  | 5.67782600  | -0.89834700 |
| H | 2.84127000  | 3.57999400  | -1.36468800 |
| C | 1.19661100  | 6.54007900  | 0.51059600  |
| H | -0.28820200 | 5.11294900  | 1.14746000  |
| C | 2.36896900  | 6.74314300  | -0.21759500 |
| H | 3.87628800  | 5.82269500  | -1.45813200 |
| H | 0.74142100  | 7.36540400  | 1.04790700  |
| H | 2.82511700  | 7.72690900  | -0.24815200 |
| C | -3.98740800 | 4.05224200  | -1.08055000 |
| C | -4.11263700 | 2.67468100  | -0.88618700 |
| C | -5.30261100 | 2.09827100  | -0.46581600 |
| C | -6.37048700 | 2.95718200  | -0.21461100 |

|    |             |             |             |
|----|-------------|-------------|-------------|
| C  | -6.26681900 | 4.33476200  | -0.38082000 |
| C  | -5.06475800 | 4.88852200  | -0.82301200 |
| C  | -2.60350400 | 4.39057800  | -1.58867900 |
| C  | -2.10641100 | 3.04762300  | -2.12676600 |
| C  | -2.77277800 | 2.02968000  | -1.17192100 |
| H  | -5.41348900 | 1.02652500  | -0.32439900 |
| H  | -7.12291400 | 4.96737200  | -0.17728500 |
| H  | -4.98640200 | 5.96035300  | -0.97324100 |
| H  | -2.59594900 | 5.14957200  | -2.37348700 |
| H  | -1.01589200 | 2.93731800  | -2.14344000 |
| H  | -2.17420400 | 1.94277600  | -0.26315400 |
| H  | -1.94841400 | 4.72864300  | -0.77692400 |
| Br | -8.01483900 | 2.21995300  | 0.37335600  |
| O  | -2.64667700 | 2.89697000  | -3.43096700 |
| C  | -2.26974500 | 1.67909800  | -4.02541200 |
| H  | -2.76384000 | 1.60127100  | -4.99400000 |
| H  | -1.18109400 | 1.62579200  | -4.17048800 |
| N  | -2.83259000 | 0.70598700  | -1.79796400 |
| C  | -3.07650300 | -0.51615600 | -1.26807000 |
| C  | -2.67958300 | 0.53653100  | -3.14759600 |
| N  | -2.86120200 | -0.70595800 | -3.48661000 |
| N  | -3.10435900 | -1.34722500 | -2.31539800 |
| C  | -3.42944700 | -2.74968800 | -2.34429100 |
| C  | -2.47154300 | -3.62936000 | -2.84606700 |
| C  | -4.69392000 | -3.15414600 | -1.89978500 |
| C  | -2.80339100 | -4.98531000 | -2.86782100 |
| C  | -4.97191100 | -4.51643000 | -1.95039900 |
| C  | -4.03965100 | -5.44595500 | -2.42019600 |
| H  | -2.07141100 | -5.69554100 | -3.24436100 |
| H  | -5.94496300 | -4.86236900 | -1.61039000 |
| C  | -4.36940200 | -6.91566400 | -2.42543600 |
| H  | -3.64963900 | -7.48140600 | -3.01995300 |
| H  | -4.35507300 | -7.31608500 | -1.40704800 |
| H  | -5.36877100 | -7.09168300 | -2.83155200 |
| C  | -5.71523100 | -2.18317300 | -1.36800200 |
| H  | -5.50731000 | -1.93243600 | -0.32035900 |
| H  | -5.73792100 | -1.25596900 | -1.94958300 |
| H  | -6.71085600 | -2.62852700 | -1.40467100 |
| C  | -1.13787700 | -3.16091900 | -3.36759800 |
| H  | -1.21487200 | -2.88221900 | -4.42296700 |
| H  | -0.76050800 | -2.28057100 | -2.83898400 |
| H  | -0.40577300 | -3.96801500 | -3.28976600 |
| C  | -3.65384800 | -0.62316100 | 2.54515200  |
| C  | -3.22882600 | -0.06970400 | 1.20502500  |

|   |             |             |            |
|---|-------------|-------------|------------|
| H | -3.66183200 | 0.18107900  | 3.28739600 |
| C | -3.12157200 | -0.99993500 | 0.16441500 |
| O | -2.92176400 | -2.22130900 | 0.30746100 |
| C | -5.02547900 | -1.25577200 | 2.40964100 |
| C | -5.17054200 | -2.64457000 | 2.39866300 |
| C | -6.15589800 | -0.46067300 | 2.18450900 |
| C | -6.41705600 | -3.22936400 | 2.17725300 |
| H | -4.29292700 | -3.26681000 | 2.54380900 |
| C | -7.40039600 | -1.04172900 | 1.95863900 |
| H | -6.05953400 | 0.62424500  | 2.17279100 |
| C | -7.53532400 | -2.43018400 | 1.95614800 |
| H | -6.51023000 | -4.31107800 | 2.16904900 |
| H | -8.26322400 | -0.40845000 | 1.77882600 |
| H | -8.50543400 | -2.88339800 | 1.77866800 |
| H | -3.49140600 | 0.95945500  | 0.99673300 |
| H | -2.93933100 | -1.38021800 | 2.88882900 |

M4C

|    |            |             |             |
|----|------------|-------------|-------------|
| C  | 2.24051500 | -4.38464100 | 0.82162300  |
| C  | 2.36792900 | -3.03403000 | 0.49357700  |
| C  | 2.61359400 | -2.06285900 | 1.45840900  |
| C  | 2.74664100 | -2.50701600 | 2.77140200  |
| C  | 2.61201000 | -3.84696200 | 3.12597700  |
| C  | 2.35207900 | -4.79774800 | 2.14238900  |
| C  | 1.98368100 | -5.21772000 | -0.41262300 |
| C  | 2.44147900 | -4.30273000 | -1.55199800 |
| C  | 2.16740500 | -2.88335100 | -1.00014100 |
| H  | 2.75266300 | -1.00811500 | 1.23150000  |
| H  | 2.72733700 | -4.14127400 | 4.16269400  |
| H  | 2.26081900 | -5.84587000 | 2.40901000  |
| H  | 2.53767300 | -6.15864000 | -0.43257400 |
| H  | 1.91685600 | -4.47439400 | -2.50183700 |
| H  | 1.14937700 | -2.57829700 | -1.25219000 |
| H  | 0.91635500 | -5.44614900 | -0.51660200 |
| Br | 3.15109300 | -1.25839800 | 4.14129300  |
| O  | 3.82989300 | -4.50914400 | -1.72364600 |
| C  | 4.38997100 | -3.70616400 | -2.73617900 |
| H  | 5.46585900 | -3.86560500 | -2.72965100 |
| H  | 3.97482900 | -3.96774300 | -3.72020400 |
| N  | 3.04927700 | -1.92211600 | -1.65490600 |
| C  | 3.02065400 | -0.58954600 | -1.60034200 |
| C  | 4.10637000 | -2.26410700 | -2.45007300 |
| N  | 4.69610500 | -1.20368700 | -2.92108900 |
| N  | 4.00885200 | -0.16341500 | -2.37079300 |

|   |            |             |             |
|---|------------|-------------|-------------|
| C | 4.36161600 | 1.19318900  | -2.68339200 |
| C | 5.69406300 | 1.59160300  | -2.49942400 |
| C | 3.36999200 | 2.04379100  | -3.18389400 |
| C | 6.01832600 | 2.89701300  | -2.85993200 |
| C | 3.75369100 | 3.34889900  | -3.50570200 |
| C | 5.06680500 | 3.79041800  | -3.35688000 |
| H | 7.04244100 | 3.23386700  | -2.71899600 |
| H | 2.99961300 | 4.03134700  | -3.89072600 |
| C | 5.45634100 | 5.20505200  | -3.69734200 |
| H | 6.28932200 | 5.22178700  | -4.40538300 |
| H | 4.61988500 | 5.75226400  | -4.13665300 |
| H | 5.78113700 | 5.74010300  | -2.79964300 |
| C | 1.93989800 | 1.60540900  | -3.37957800 |
| H | 1.87829200 | 0.62385200  | -3.85964300 |
| H | 1.39095900 | 1.51995200  | -2.43325300 |
| H | 1.41775400 | 2.33010000  | -4.00831100 |
| C | 6.73117700 | 0.68250300  | -1.89758500 |
| H | 6.32536000 | 0.10071300  | -1.06729600 |
| H | 7.10335100 | -0.03249100 | -2.63676500 |
| H | 7.57491900 | 1.27498000  | -1.53803500 |
| H | 2.30400100 | 0.01513900  | -1.06149700 |
| B | 6.05878700 | -2.16973700 | 0.38382100  |
| F | 5.05792100 | -1.22093600 | 0.05415100  |
| F | 7.29575800 | -1.52001000 | 0.42173200  |
| F | 6.07641100 | -3.15503500 | -0.61553200 |
| F | 5.76054100 | -2.74113200 | 1.61813400  |
| N | 3.77081000 | 1.45489900  | 2.18925800  |
| C | 2.65316500 | 2.08127200  | 2.88455100  |
| C | 2.71789100 | 3.59424000  | 3.12733300  |
| H | 2.56292700 | 1.57115100  | 3.85042400  |
| H | 1.73377200 | 1.84613400  | 2.33418000  |
| H | 1.86697700 | 3.89741800  | 3.74751900  |
| H | 3.63771700 | 3.88070500  | 3.64851500  |
| H | 2.65717600 | 4.15869200  | 2.19259600  |
| C | 5.00841700 | 1.47888700  | 2.95599000  |
| C | 6.02789000 | 0.46507100  | 2.45718800  |
| H | 4.74460500 | 1.23438300  | 3.99295000  |
| H | 5.46603900 | 2.48486400  | 2.98366400  |
| H | 6.93463300 | 0.51499200  | 3.06844000  |
| H | 5.62216100 | -0.54794900 | 2.50875900  |
| H | 6.31674200 | 0.64229800  | 1.41795300  |
| C | 3.92272100 | 1.81940200  | 0.78269200  |
| C | 4.74035200 | 3.07967200  | 0.46661800  |
| H | 2.90748900 | 1.93372500  | 0.37704900  |

|   |             |             |             |
|---|-------------|-------------|-------------|
| H | 4.38763200  | 0.96950300  | 0.26417700  |
| H | 4.63066800  | 3.33457900  | -0.59186000 |
| H | 4.41502100  | 3.94110400  | 1.05454800  |
| H | 5.80676900  | 2.91685200  | 0.65889100  |
| C | -1.30691700 | -0.25802300 | 1.68926800  |
| C | -0.48448100 | 0.12558800  | 0.46220600  |
| H | -1.08726100 | -1.31171600 | 1.91066300  |
| C | -0.27613900 | -0.80995100 | -0.54713200 |
| H | -0.57948700 | -1.84743400 | -0.27223300 |
| O | 0.18345100  | -0.61664000 | -1.71023200 |
| C | -0.94742300 | 0.54639000  | 2.91901300  |
| C | -0.12179400 | -0.01751800 | 3.89016500  |
| C | -1.38244600 | 1.86602500  | 3.08578900  |
| C | 0.25978600  | 0.71463200  | 5.01256300  |
| H | 0.25113100  | -1.02950100 | 3.75499300  |
| C | -1.00342400 | 2.59976600  | 4.20534500  |
| H | -2.01726700 | 2.32860000  | 2.33245700  |
| C | -0.18213800 | 2.02368600  | 5.17534600  |
| H | 0.92063600  | 0.26013700  | 5.74462400  |
| H | -1.34843800 | 3.62260800  | 4.32228400  |
| H | 0.11487300  | 2.59735900  | 6.04751000  |
| C | -0.02496500 | 1.44752600  | 0.29192900  |
| C | 0.31628200  | 2.61562400  | 0.18958400  |
| C | 0.77673600  | 3.96499000  | 0.14009600  |
| C | 1.81423400  | 4.33169400  | -0.73076200 |
| C | 0.21063200  | 4.94393500  | 0.97608200  |
| C | 2.28548300  | 5.63858700  | -0.75439200 |
| H | 2.26261200  | 3.57643000  | -1.36713400 |
| C | 0.68618300  | 6.24943900  | 0.94423700  |
| H | -0.58534000 | 4.65932300  | 1.65796900  |
| C | 1.72545700  | 6.60300800  | 0.08255200  |
| H | 3.09979300  | 5.89778700  | -1.42566500 |
| H | 0.24802300  | 6.99503700  | 1.60000300  |
| H | 2.09644800  | 7.62231300  | 0.06635200  |
| C | -3.73820400 | 3.84814000  | -1.28879000 |
| C | -3.98680500 | 2.50255200  | -1.00374600 |
| C | -5.20434400 | 2.07213600  | -0.50048400 |
| C | -6.17302100 | 3.04730400  | -0.26461200 |
| C | -5.94622400 | 4.39468100  | -0.52475300 |
| C | -4.71753600 | 4.79998200  | -1.04625600 |
| C | -2.34633700 | 4.02512000  | -1.85071700 |
| C | -1.98302200 | 2.60930700  | -2.30086500 |
| C | -2.71993400 | 1.72367500  | -1.27250100 |
| H | -5.41838400 | 1.02547500  | -0.29907400 |

|    |             |             |             |
|----|-------------|-------------|-------------|
| H  | -6.72874300 | 5.11875000  | -0.33031100 |
| H  | -4.54186800 | 5.84801600  | -1.26597400 |
| H  | -2.29759800 | 4.72179000  | -2.69015000 |
| H  | -0.90794200 | 2.39387000  | -2.31805900 |
| H  | -2.10536200 | 1.65598200  | -0.37752300 |
| H  | -1.64617800 | 4.36252400  | -1.07800200 |
| Br | -7.85627900 | 2.52790000  | 0.43365800  |
| O  | -2.56279700 | 2.42430100  | -3.58482100 |
| C  | -2.32146400 | 1.14174600  | -4.10289800 |
| H  | -2.86574600 | 1.04018900  | -5.04210400 |
| H  | -1.24954800 | 0.97777100  | -4.28740700 |
| N  | -2.89159900 | 0.36496200  | -1.79986700 |
| C  | -3.12918300 | -0.81280600 | -1.18028800 |
| C  | -2.77090200 | 0.09410400  | -3.13090500 |
| N  | -2.98396800 | -1.16978000 | -3.37499800 |
| N  | -3.20758000 | -1.71684300 | -2.16115900 |
| C  | -3.53095900 | -3.11923100 | -2.08563700 |
| C  | -2.54080400 | -4.03320300 | -2.43607400 |
| C  | -4.82428600 | -3.47783300 | -1.68909200 |
| C  | -2.88051300 | -5.38620600 | -2.35728700 |
| C  | -5.10693900 | -4.83727400 | -1.63405800 |
| C  | -4.14728400 | -5.80385600 | -1.95661700 |
| H  | -2.12945000 | -6.12793900 | -2.61663000 |
| H  | -6.10182900 | -5.15315900 | -1.33057900 |
| C  | -4.48565900 | -7.26780000 | -1.85413100 |
| H  | -3.72407900 | -7.88558700 | -2.33319300 |
| H  | -4.55787100 | -7.57188500 | -0.80538200 |
| H  | -5.44996100 | -7.47985200 | -2.32280400 |
| C  | -5.85569900 | -2.44688100 | -1.31296600 |
| H  | -5.67363400 | -2.05572100 | -0.30430000 |
| H  | -5.86303900 | -1.60497900 | -2.01267000 |
| H  | -6.85122800 | -2.89322900 | -1.30782100 |
| C  | -1.17234400 | -3.60670800 | -2.90058400 |
| H  | -1.15953400 | -3.50028200 | -3.99005400 |
| H  | -0.85233100 | -2.64626700 | -2.48325100 |
| H  | -0.44033400 | -4.37314800 | -2.63554500 |
| C  | -3.63593500 | -0.70302400 | 2.67043200  |
| C  | -2.85807500 | -0.23612400 | 1.41610300  |
| H  | -3.64531600 | 0.13710900  | 3.37088500  |
| C  | -3.07906100 | -1.22154500 | 0.29140900  |
| O  | -3.11420700 | -2.40897300 | 0.50494900  |
| C  | -5.04300700 | -1.18947100 | 2.40707800  |
| C  | -5.33351400 | -2.55612900 | 2.47941000  |
| C  | -6.07218000 | -0.30563100 | 2.06657900  |

|    |             |             |             |
|----|-------------|-------------|-------------|
| C  | -6.61544500 | -3.03226100 | 2.21979600  |
| H  | -4.53818900 | -3.25088500 | 2.73237000  |
| C  | -7.35569800 | -0.78124800 | 1.79629200  |
| H  | -5.87961500 | 0.76558100  | 2.02674500  |
| C  | -7.63138100 | -2.14394000 | 1.87408200  |
| H  | -6.81800500 | -4.09675000 | 2.28317100  |
| H  | -8.13946600 | -0.08187200 | 1.52878100  |
| H  | -8.63183800 | -2.50990000 | 1.66733800  |
| H  | -3.19146700 | 0.76562000  | 1.12437800  |
| H  | -3.06230000 | -1.50562000 | 3.14486400  |
| M4 |             |             |             |
| C  | 0.50108200  | -1.24360200 | 2.27986900  |
| C  | 1.07224500  | -2.17347600 | 1.21101900  |
| H  | -0.25627100 | -1.80256900 | 2.84766100  |
| C  | 0.21605300  | -3.05124500 | 0.51990100  |
| H  | -0.77795700 | -3.19029200 | 1.00897600  |
| O  | 0.42150100  | -3.62814900 | -0.57322400 |
| C  | 1.53456000  | -0.73857600 | 3.26537000  |
| C  | 1.56063000  | -1.23232800 | 4.56999300  |
| C  | 2.48195400  | 0.22353500  | 2.89496800  |
| C  | 2.51198700  | -0.78528900 | 5.48580600  |
| H  | 0.82854500  | -1.97734000 | 4.87039000  |
| C  | 3.42878100  | 0.67762100  | 3.80771900  |
| H  | 2.48539500  | 0.61980700  | 1.88170500  |
| C  | 3.44838100  | 0.17194800  | 5.10732900  |
| H  | 2.51582900  | -1.18270000 | 6.49574300  |
| H  | 4.15237200  | 1.42815800  | 3.50441900  |
| H  | 4.18707600  | 0.52588400  | 5.81903800  |
| C  | 2.41601800  | -2.07349300 | 0.81154300  |
| C  | 3.57923600  | -1.95247800 | 0.45506800  |
| C  | 4.92507600  | -1.77378100 | 0.02473400  |
| C  | 5.43073300  | -2.47915400 | -1.08356400 |
| C  | 5.76391500  | -0.84910900 | 0.67549300  |
| C  | 6.73076600  | -2.26069600 | -1.52359500 |
| H  | 4.79092600  | -3.19606700 | -1.58876800 |
| C  | 7.06194400  | -0.63868400 | 0.22681500  |
| H  | 5.37822100  | -0.30611200 | 1.53326000  |
| C  | 7.55300400  | -1.34035500 | -0.87426300 |
| H  | 7.10474800  | -2.81299600 | -2.38008800 |
| H  | 7.69544900  | 0.07805200  | 0.74019300  |
| H  | 8.56681800  | -1.17236800 | -1.22194600 |
| C  | 2.47395800  | 1.54594200  | -2.14354900 |
| C  | 1.22264200  | 1.28839000  | -1.57598400 |

|    |             |             |             |
|----|-------------|-------------|-------------|
| C  | 0.33612900  | 2.30667300  | -1.26254100 |
| C  | 0.75614400  | 3.61277500  | -1.51179500 |
| C  | 2.00203000  | 3.89792500  | -2.05994700 |
| C  | 2.86885800  | 2.85376100  | -2.38395000 |
| C  | 3.21449400  | 0.25459900  | -2.40591000 |
| C  | 2.09465600  | -0.78747700 | -2.37425200 |
| C  | 1.10945000  | -0.19968000 | -1.34177200 |
| H  | -0.65045000 | 2.11544800  | -0.84822500 |
| H  | 2.28681300  | 4.92774800  | -2.24086300 |
| H  | 3.83535200  | 3.07084400  | -2.82705600 |
| H  | 3.73475400  | 0.23423200  | -3.36589600 |
| H  | 2.40640500  | -1.79987200 | -2.09207500 |
| H  | 1.45699400  | -0.47159000 | -0.34695300 |
| H  | 3.94085200  | 0.04664800  | -1.61245000 |
| Br | -0.40266500 | 5.05259500  | -1.08995600 |
| O  | 1.48893400  | -0.77585100 | -3.66071600 |
| C  | 0.41971800  | -1.68144600 | -3.75670800 |
| H  | -0.05477000 | -1.55279400 | -4.73000100 |
| H  | 0.76291300  | -2.72089900 | -3.65588000 |
| N  | -0.22403500 | -0.78454800 | -1.51699600 |
| C  | -1.27068600 | -0.89518400 | -0.66926600 |
| C  | -0.57338100 | -1.43486200 | -2.66264400 |
| N  | -1.79899500 | -1.87751000 | -2.59783700 |
| N  | -2.21763200 | -1.53486300 | -1.36126800 |
| C  | -3.57531800 | -1.84005500 | -0.98718300 |
| C  | -3.92464400 | -3.18024200 | -0.84789500 |
| C  | -4.46681300 | -0.77398200 | -0.81731900 |
| C  | -5.25235900 | -3.44645000 | -0.49954900 |
| C  | -5.77333500 | -1.09926400 | -0.47555300 |
| C  | -6.18188300 | -2.42809100 | -0.30794500 |
| H  | -5.55897100 | -4.48161700 | -0.37426600 |
| H  | -6.49348600 | -0.29693900 | -0.33529800 |
| C  | -7.60542600 | -2.73577400 | 0.07653600  |
| H  | -7.78108500 | -3.81211100 | 0.11796100  |
| H  | -7.84058100 | -2.31312600 | 1.05772700  |
| H  | -8.30521900 | -2.30011400 | -0.64210800 |
| C  | -4.02940500 | 0.65909600  | -0.97047900 |
| H  | -3.45574300 | 0.99373100  | -0.09745600 |
| H  | -3.41097000 | 0.80180700  | -1.86232300 |
| H  | -4.89918400 | 1.31281200  | -1.05114900 |
| C  | -2.94485800 | -4.30285700 | -1.07333500 |
| H  | -2.99741400 | -4.63995100 | -2.11377700 |
| H  | -1.90560400 | -4.01862700 | -0.88081300 |
| H  | -3.20116700 | -5.15196900 | -0.43664400 |



|     |             |             |            |
|-----|-------------|-------------|------------|
| C   | -0.92566300 | 0.83665500  | 2.78550300 |
| C   | -0.30048000 | -0.02954000 | 1.66540700 |
| H   | -0.11641900 | 1.43264200  | 3.21749500 |
| C   | -1.40281500 | -0.64007000 | 0.83105500 |
| O   | -2.41577700 | -1.04984700 | 1.34474200 |
| C   | -2.06234800 | 1.73093800  | 2.34496700 |
| C   | -3.37764200 | 1.41919300  | 2.70587800 |
| C   | -1.83825800 | 2.86477200  | 1.55706700 |
| C   | -4.44293200 | 2.21460700  | 2.29364500 |
| H   | -3.56296600 | 0.53444300  | 3.30766400 |
| C   | -2.90511000 | 3.65720600  | 1.13240300 |
| H   | -0.82225500 | 3.14500200  | 1.28286400 |
| C   | -4.20906900 | 3.33640400  | 1.50127800 |
| H   | -5.45505700 | 1.95371300  | 2.58664400 |
| H   | -2.71191900 | 4.52771700  | 0.51561700 |
| H   | -5.03646600 | 3.95697100  | 1.17270300 |
| H   | 0.35569400  | 0.58840700  | 1.04303300 |
| H   | -1.28267600 | 0.16558500  | 3.57348600 |
| TS5 |             |             |            |
| C   | 0.53636400  | 0.34312400  | 2.73950500 |
| C   | 1.12031000  | -1.04459200 | 2.53223200 |
| H   | 0.11937000  | 0.37507500  | 3.75614100 |
| C   | 0.24387300  | -2.06428400 | 2.43223800 |
| H   | 0.55839500  | -3.10121700 | 2.32175100 |
| O   | -1.08283100 | -1.87592800 | 2.43172400 |
| C   | 1.53206800  | 1.47639800  | 2.59464200 |
| C   | 1.75994400  | 2.37186200  | 3.63907600 |
| C   | 2.17980600  | 1.69711500  | 1.37339800 |
| C   | 2.60276300  | 3.47047900  | 3.46552200 |
| H   | 1.26278500  | 2.21702700  | 4.59313100 |
| C   | 3.00398400  | 2.80191000  | 1.18741600 |
| H   | 2.04282600  | 0.99219300  | 0.55974100 |
| C   | 3.21850400  | 3.69477400  | 2.23789200 |
| H   | 2.76586900  | 4.15765200  | 4.28956400 |
| H   | 3.46349000  | 2.96868700  | 0.21669000 |
| H   | 3.85966400  | 4.55898200  | 2.09840400 |
| C   | 2.49503200  | -1.26683900 | 2.23958000 |
| C   | 3.61970500  | -1.41840600 | 1.80636100 |
| C   | 4.91630300  | -1.53953000 | 1.21138400 |
| C   | 5.66655000  | -2.71923900 | 1.32907200 |
| C   | 5.41998200  | -0.47257400 | 0.44939300 |
| C   | 6.89896500  | -2.82554400 | 0.69417400 |
| H   | 5.27414000  | -3.54273000 | 1.91640600 |

|    |             |             |             |
|----|-------------|-------------|-------------|
| C  | 6.65349100  | -0.58859000 | -0.18030700 |
| H  | 4.82905000  | 0.43403900  | 0.35703000  |
| C  | 7.39485400  | -1.76364800 | -0.06102600 |
| H  | 7.47427800  | -3.74057500 | 0.78867100  |
| H  | 7.03601400  | 0.23960600  | -0.76824000 |
| H  | 8.35649000  | -1.85167900 | -0.55560000 |
| C  | 2.69765600  | -1.08323000 | -1.92864100 |
| C  | 1.43324700  | -0.68057100 | -1.48506700 |
| C  | 0.98829700  | 0.62312800  | -1.64553900 |
| C  | 1.89069800  | 1.53959900  | -2.18787800 |
| C  | 3.16861400  | 1.17233700  | -2.59578200 |
| C  | 3.57137800  | -0.15903000 | -2.48160300 |
| C  | 2.89137200  | -2.56619100 | -1.70958000 |
| C  | 1.46247500  | -3.05507300 | -1.46241600 |
| C  | 0.80872100  | -1.85369100 | -0.75522700 |
| H  | -0.00676700 | 0.94004200  | -1.34411600 |
| H  | 3.83705000  | 1.91928200  | -3.00807000 |
| H  | 4.55877900  | -0.45878700 | -2.81848500 |
| H  | 3.33824200  | -3.07641400 | -2.56561800 |
| H  | 1.39672100  | -3.97705400 | -0.87066900 |
| H  | 1.14179000  | -1.82872600 | 0.28070800  |
| H  | 3.51411500  | -2.75686400 | -0.82716500 |
| Br | 1.39958100  | 3.36669800  | -2.31070400 |
| O  | 0.84737700  | -3.23078500 | -2.73070900 |
| C  | -0.49744300 | -3.64193000 | -2.63629300 |
| H  | -0.92943600 | -3.60496900 | -3.63696700 |
| H  | -0.56585400 | -4.67340200 | -2.26228600 |
| N  | -0.64481000 | -1.97661200 | -0.76570800 |
| C  | -1.59251300 | -1.40918800 | 0.03781500  |
| C  | -1.27274000 | -2.75431500 | -1.70481700 |
| N  | -2.56052600 | -2.69021100 | -1.56802300 |
| N  | -2.73547500 | -1.85312100 | -0.49452800 |
| C  | -4.09232600 | -1.45370700 | -0.21120500 |
| C  | -4.84192000 | -2.17810800 | 0.71616600  |
| C  | -4.60515600 | -0.40116500 | -0.96284400 |
| C  | -6.16182400 | -1.78419700 | 0.90806200  |
| C  | -5.93592400 | -0.04224900 | -0.73456200 |
| C  | -6.72170900 | -0.71572000 | 0.19812800  |
| H  | -6.77122000 | -2.32165100 | 1.63091400  |
| H  | -6.36306900 | 0.77855600  | -1.30551300 |
| C  | -8.15185200 | -0.30977500 | 0.44685700  |
| H  | -8.27236000 | 0.08554100  | 1.46004700  |
| H  | -8.47321000 | 0.46047100  | -0.25711500 |
| H  | -8.82522600 | -1.16602800 | 0.34991200  |

|   |             |             |             |
|---|-------------|-------------|-------------|
| C | -3.75004700 | 0.30435600  | -1.98087800 |
| H | -2.90369300 | 0.80555800  | -1.49606300 |
| H | -3.35197600 | -0.40419600 | -2.71416400 |
| H | -4.32715300 | 1.06540900  | -2.50733500 |
| C | -4.21773900 | -3.30777800 | 1.48533300  |
| H | -3.77993800 | -4.04922600 | 0.80930800  |
| H | -3.41778100 | -2.91292000 | 2.11916200  |
| H | -4.95959600 | -3.80664200 | 2.11132400  |
| C | -1.41817500 | 1.82303200  | 2.06680800  |
| C | -0.64146600 | 0.53576600  | 1.74780400  |
| H | -0.70184500 | 2.57809300  | 2.40661900  |
| C | -1.64116500 | -0.65996600 | 1.73877000  |
| O | -2.81852800 | -0.48098400 | 2.05194200  |
| C | -2.17235000 | 2.39723400  | 0.89300000  |
| C | -3.56693900 | 2.39992700  | 0.83521600  |
| C | -1.45594600 | 2.99648900  | -0.14915300 |
| C | -4.22976300 | 3.02785900  | -0.21833900 |
| H | -4.12655400 | 1.89830200  | 1.61868000  |
| C | -2.11359500 | 3.59753200  | -1.21933700 |
| H | -0.36740400 | 3.00876400  | -0.10639200 |
| C | -3.50740800 | 3.63086400  | -1.24574200 |
| H | -5.31563800 | 3.03288900  | -0.24143300 |
| H | -1.53509600 | 4.04465200  | -2.02211800 |
| H | -4.02646200 | 4.11198700  | -2.06893900 |
| H | -0.19306600 | 0.62429200  | 0.75378500  |
| H | -2.10526300 | 1.61481900  | 2.88947000  |
| P |             |             |             |
| C | -0.34286000 | -0.68744000 | 0.85526800  |
| C | 0.50639700  | -1.71701300 | 0.11970300  |
| H | -0.33458900 | -0.93036100 | 1.92710700  |
| C | -0.05974800 | -2.83752100 | -0.34497600 |
| H | 0.46961000  | -3.61440900 | -0.88111400 |
| O | -1.37494300 | -3.16901200 | -0.14370000 |
| C | 0.19861400  | 0.71908500  | 0.68776900  |
| C | 0.57955600  | 1.46916100  | 1.79882300  |
| C | 0.33990200  | 1.27628100  | -0.58747400 |
| C | 1.09090500  | 2.75783700  | 1.64453300  |
| H | 0.47828100  | 1.04144500  | 2.79260300  |
| C | 0.84827400  | 2.56104600  | -0.74494900 |
| H | 0.07096900  | 0.69249100  | -1.46496700 |
| C | 1.22563500  | 3.30654200  | 0.37277800  |
| H | 1.38276200  | 3.32952700  | 2.51948200  |
| H | 0.95701800  | 2.97938100  | -1.74028600 |

|      |             |             |             |
|------|-------------|-------------|-------------|
| H    | 1.62308800  | 4.30867000  | 0.24975300  |
| C    | 1.89523300  | -1.46110800 | -0.06096900 |
| C    | 3.05123100  | -1.11321100 | -0.17017500 |
| C    | 4.38788800  | -0.61627800 | -0.28566100 |
| C    | 5.44702800  | -1.44603700 | -0.67931000 |
| C    | 4.63380500  | 0.73623700  | 0.00114900  |
| C    | 6.73260600  | -0.92717100 | -0.78323400 |
| H    | 5.25237500  | -2.49018700 | -0.89980900 |
| C    | 5.92257200  | 1.24440300  | -0.10434800 |
| H    | 3.80445500  | 1.36997300  | 0.30265300  |
| C    | 6.97349900  | 0.41552200  | -0.49623100 |
| H    | 7.54936000  | -1.57284500 | -1.08848900 |
| H    | 6.10837500  | 2.28992800  | 0.11845500  |
| H    | 7.97869200  | 0.81564900  | -0.57805300 |
| C    | -2.78997700 | 0.10123800  | 1.06293300  |
| C    | -1.78893000 | -0.79991900 | 0.32707800  |
| H    | -2.26753100 | 1.02043100  | 1.34646800  |
| C    | -2.25465300 | -2.24161200 | 0.34355800  |
| O    | -3.32947200 | -2.62688700 | 0.71269500  |
| C    | -3.98728800 | 0.45953500  | 0.21282400  |
| C    | -5.23290700 | -0.13880000 | 0.40678100  |
| C    | -3.84569300 | 1.40685400  | -0.80656100 |
| C    | -6.31673200 | 0.20448200  | -0.39916600 |
| H    | -5.34487200 | -0.88590100 | 1.18642300  |
| C    | -4.92457300 | 1.74907400  | -1.61605500 |
| H    | -2.87747300 | 1.88058300  | -0.96025300 |
| C    | -6.16576400 | 1.14770100  | -1.41265800 |
| H    | -7.28019700 | -0.26805100 | -0.23573000 |
| H    | -4.79893700 | 2.48781100  | -2.40134700 |
| H    | -7.00999400 | 1.41405200  | -2.04042500 |
| H    | -1.76091400 | -0.51878800 | -0.73664700 |
| H    | -3.10926500 | -0.39554100 | 1.98363600  |
| TS1' |             |             |             |
| C    | -4.50501800 | -1.67997900 | -0.79178900 |
| C    | -3.17207000 | -1.26161400 | -0.78532500 |
| C    | -2.83522000 | 0.08486900  | -0.81777700 |
| C    | -3.88363300 | 1.00297500  | -0.82104800 |
| C    | -5.21897900 | 0.60973300  | -0.80463700 |
| C    | -5.53415600 | -0.74803000 | -0.79863300 |
| C    | -4.58905600 | -3.18772700 | -0.81358500 |
| C    | -3.21070400 | -3.59598900 | -0.29720800 |
| C    | -2.26954300 | -2.48365000 | -0.82427400 |
| H    | -1.80109100 | 0.40540800  | -0.88360700 |

|    |             |             |             |
|----|-------------|-------------|-------------|
| H  | -6.00144700 | 1.35981600  | -0.80450400 |
| H  | -6.57249800 | -1.06447700 | -0.79489700 |
| H  | -5.37710200 | -3.59927300 | -0.17937000 |
| H  | -2.88787800 | -4.59955700 | -0.60198100 |
| H  | -1.95515700 | -2.67760100 | -1.85377100 |
| H  | -4.73832900 | -3.55696100 | -1.83412700 |
| Br | -3.48859900 | 2.85941000  | -0.87766200 |
| O  | -3.29310600 | -3.51304900 | 1.12056900  |
| C  | -2.09662000 | -3.86832900 | 1.77091900  |
| H  | -2.22343600 | -3.67203900 | 2.83648800  |
| H  | -1.87680300 | -4.93712500 | 1.63519900  |
| N  | -1.05399900 | -2.44860200 | -0.00337800 |
| C  | 0.15471300  | -1.91354300 | -0.32102300 |
| C  | -0.95844000 | -3.06679200 | 1.22087600  |
| N  | 0.23495400  | -2.93959600 | 1.71604000  |
| N  | 0.89772400  | -2.22549700 | 0.74593600  |
| C  | 2.26818400  | -1.85032300 | 0.93667900  |
| C  | 3.25154500  | -2.50248300 | 0.19060900  |
| C  | 2.55565300  | -0.81164700 | 1.82610200  |
| C  | 4.56437800  | -2.05191100 | 0.32167900  |
| C  | 3.88367300  | -0.40061200 | 1.92594400  |
| C  | 4.89405900  | -0.99268900 | 1.16775700  |
| H  | 5.34613300  | -2.53399000 | -0.26064600 |
| H  | 4.12995200  | 0.42113900  | 2.59439300  |
| C  | 6.30032300  | -0.45958200 | 1.21731100  |
| H  | 6.42206300  | 0.32456700  | 0.46149800  |
| H  | 6.52612800  | -0.02132100 | 2.19225400  |
| H  | 7.03183300  | -1.24392000 | 1.00908400  |
| C  | 1.47240100  | -0.17031200 | 2.64967300  |
| H  | 0.56739500  | -0.02364600 | 2.05612800  |
| H  | 1.21024100  | -0.80035800 | 3.50536100  |
| H  | 1.79816900  | 0.80274400  | 3.02334400  |
| C  | 2.90709500  | -3.63405900 | -0.74109200 |
| H  | 2.19902600  | -4.32788200 | -0.27992200 |
| H  | 2.44616000  | -3.26121200 | -1.66187300 |
| H  | 3.80662900  | -4.18698500 | -1.01704500 |
| C  | 2.75228700  | 0.09250300  | -1.88055200 |
| C  | 1.45090800  | 0.11809800  | -1.53213300 |
| H  | 3.03820800  | -0.71346500 | -2.55808000 |
| C  | 0.52117800  | -0.94064500 | -2.11571000 |
| H  | 1.10390700  | -1.79559700 | -2.51769300 |
| O  | -0.57543600 | -0.63697500 | -2.60572900 |
| C  | 3.85232700  | 0.99282200  | -1.51824900 |
| C  | 5.04623400  | 0.89028600  | -2.24929500 |

|   |             |            |             |
|---|-------------|------------|-------------|
| C | 3.78346400  | 1.94323000 | -0.48696100 |
| C | 6.12352000  | 1.73133700 | -1.99125400 |
| H | 5.11820000  | 0.14780400 | -3.03973000 |
| C | 4.86528600  | 2.77569700 | -0.22197500 |
| H | 2.88637400  | 2.01854400 | 0.11595300  |
| C | 6.03416500  | 2.68359100 | -0.97774800 |
| H | 7.03163500  | 1.64167100 | -2.57863700 |
| H | 4.79505500  | 3.50321900 | 0.58058600  |
| H | 6.87174800  | 3.34183700 | -0.77062900 |
| C | 0.81416100  | 1.05424400 | -0.66752300 |
| C | 0.16159800  | 1.74292100 | 0.09074300  |
| C | -0.64508800 | 2.51422600 | 0.98664200  |
| C | -1.57184300 | 1.86375400 | 1.81588600  |
| C | -0.56488200 | 3.91324200 | 1.00137600  |
| C | -2.41443000 | 2.60588400 | 2.63358900  |
| H | -1.64312600 | 0.78032900 | 1.78821800  |
| C | -1.41393200 | 4.64767500 | 1.82077800  |
| H | 0.14999500  | 4.41118100 | 0.35487600  |
| C | -2.34122400 | 3.99767600 | 2.63424000  |
| H | -3.13631800 | 2.09771900 | 3.26438500  |
| H | -1.35510500 | 5.73115100 | 1.82223500  |
| H | -3.00587900 | 4.57589000 | 3.26768800  |

TS1'C

|    |             |             |             |
|----|-------------|-------------|-------------|
| C  | -1.70081900 | -3.23529800 | 2.48012800  |
| C  | -0.79586000 | -2.47090400 | 1.74350400  |
| C  | -0.05582400 | -1.44708600 | 2.32580900  |
| C  | -0.28471000 | -1.19659400 | 3.67535600  |
| C  | -1.17733700 | -1.94960500 | 4.43577900  |
| C  | -1.88711800 | -2.98541500 | 3.83473700  |
| C  | -2.40629300 | -4.23937300 | 1.59904000  |
| C  | -1.57563800 | -4.24985300 | 0.31293200  |
| C  | -0.91927300 | -2.84900800 | 0.28684200  |
| H  | 0.68319100  | -0.85254800 | 1.79082600  |
| H  | -1.31154200 | -1.72270800 | 5.48703200  |
| H  | -2.57947200 | -3.58110200 | 4.42104600  |
| H  | -2.45856700 | -5.24258400 | 2.02823000  |
| H  | -2.17558000 | -4.42718700 | -0.58748600 |
| H  | -1.56388200 | -2.12911800 | -0.22239500 |
| H  | -3.42820400 | -3.91105000 | 1.37324900  |
| Br | 0.61392200  | 0.25274000  | 4.49878300  |
| O  | -0.58071900 | -5.25041400 | 0.42939200  |
| C  | 0.20547500  | -5.35107800 | -0.73793200 |
| H  | 0.96513300  | -6.11027700 | -0.56863900 |

|   |             |             |             |
|---|-------------|-------------|-------------|
| H | -0.41615900 | -5.61013200 | -1.60762200 |
| N | 0.32115500  | -2.89395100 | -0.47679200 |
| C | 1.09976700  | -1.88321800 | -0.86175700 |
| C | 0.86986300  | -4.03395900 | -0.99170800 |
| N | 1.92263700  | -3.76186000 | -1.70934100 |
| N | 2.05168000  | -2.40985800 | -1.60936500 |
| C | 3.05771000  | -1.69044600 | -2.33493200 |
| C | 4.39955500  | -2.01409900 | -2.10419800 |
| C | 2.64152900  | -0.71555200 | -3.24868800 |
| C | 5.35184300  | -1.31859300 | -2.84596700 |
| C | 3.64221200  | -0.05334400 | -3.96075200 |
| C | 4.99368200  | -0.33516100 | -3.77093400 |
| H | 6.40357700  | -1.54010300 | -2.68019900 |
| H | 3.35236700  | 0.70235900  | -4.68376500 |
| C | 6.05365100  | 0.41798400  | -4.53091800 |
| H | 6.57568600  | 1.11546700  | -3.86768900 |
| H | 6.80020000  | -0.26408200 | -4.94617100 |
| H | 5.61729500  | 0.99766800  | -5.34720500 |
| C | 1.18967500  | -0.36954400 | -3.47168400 |
| H | 0.54675800  | -1.25526300 | -3.49638300 |
| H | 0.80135300  | 0.28058500  | -2.67741300 |
| H | 1.07863300  | 0.16075100  | -4.41969200 |
| C | 4.79990300  | -3.03051500 | -1.07005000 |
| H | 4.20422900  | -2.93863400 | -0.15855200 |
| H | 4.65159300  | -4.04951100 | -1.43967100 |
| H | 5.85453100  | -2.90783900 | -0.81536000 |
| H | 0.94551200  | -0.83352100 | -0.65244200 |
| B | 2.86289600  | -4.28918200 | 1.80550700  |
| F | 2.40178000  | -3.08155900 | 1.22365400  |
| F | 4.26124100  | -4.30486500 | 1.74928200  |
| F | 2.34926700  | -5.36379300 | 1.06289900  |
| F | 2.42598000  | -4.36494600 | 3.12362600  |
| N | 3.12838300  | 0.53684100  | 2.22954200  |
| C | 2.90584600  | 1.97383600  | 2.32569400  |
| C | 4.11410900  | 2.90264800  | 2.51074600  |
| H | 2.22792900  | 2.13546000  | 3.17467800  |
| H | 2.34626500  | 2.27857400  | 1.43544500  |
| H | 3.75335500  | 3.92348200  | 2.67413700  |
| H | 4.71033800  | 2.61668100  | 3.38217300  |
| H | 4.77751300  | 2.92080800  | 1.64189900  |
| C | 3.87578800  | 0.00485900  | 3.36217100  |
| C | 3.71944900  | -1.50009300 | 3.51688500  |
| H | 3.48061500  | 0.49803200  | 4.25896600  |
| H | 4.94828600  | 0.26570200  | 3.31518900  |

|   |             |             |             |
|---|-------------|-------------|-------------|
| H | 4.21428600  | -1.83355800 | 4.43421900  |
| H | 2.66181100  | -1.76887600 | 3.57249700  |
| H | 4.15027100  | -2.05884900 | 2.68271100  |
| C | 3.56300000  | 0.04316800  | 0.92430700  |
| C | 5.05564600  | 0.16530700  | 0.59136900  |
| H | 2.97420800  | 0.57990900  | 0.16639100  |
| H | 3.27891700  | -1.01532000 | 0.85465300  |
| H | 5.22634300  | -0.12400200 | -0.44935000 |
| H | 5.42721900  | 1.18526400  | 0.72027200  |
| H | 5.65635700  | -0.49410300 | 1.22605800  |
| C | -0.77101700 | 2.27167700  | 1.92441500  |
| C | -0.57360700 | 1.80808800  | 0.67094500  |
| H | -1.51020700 | 1.72275500  | 2.51155300  |
| C | -1.36975500 | 0.61650400  | 0.20285200  |
| H | -1.94281600 | 0.13097000  | 1.01261500  |
| O | -0.97981200 | -0.03484000 | -0.78221500 |
| C | -0.18008800 | 3.42070000  | 2.60970100  |
| C | -0.43052400 | 3.56362400  | 3.98380900  |
| C | 0.59096100  | 4.39946900  | 1.96159100  |
| C | 0.09533000  | 4.63356900  | 4.69773900  |
| H | -1.02265700 | 2.80850000  | 4.49288200  |
| C | 1.10499100  | 5.47567600  | 2.67656700  |
| H | 0.77948000  | 4.32131300  | 0.89734800  |
| C | 0.86606400  | 5.59455000  | 4.04544800  |
| H | -0.10028800 | 4.72173500  | 5.76131900  |
| H | 1.69629600  | 6.22584700  | 2.16040600  |
| H | 1.27491300  | 6.43327000  | 4.59939900  |
| C | 0.41168600  | 2.24579900  | -0.26327000 |
| C | 1.27163200  | 2.48270700  | -1.08743900 |
| C | 2.34371300  | 2.79161000  | -1.98673200 |
| C | 3.65515700  | 2.88716800  | -1.49550800 |
| C | 2.10242200  | 3.00031700  | -3.35229000 |
| C | 4.70138700  | 3.19666900  | -2.35646000 |
| H | 3.83839200  | 2.71628000  | -0.43892500 |
| C | 3.15043400  | 3.33781300  | -4.20179300 |
| H | 1.09253300  | 2.89018300  | -3.73187900 |
| C | 4.45051400  | 3.43504600  | -3.70735300 |
| H | 5.71340600  | 3.26110300  | -1.96945900 |
| H | 2.95418000  | 3.51038400  | -5.25526700 |
| H | 5.26776000  | 3.68981900  | -4.37443800 |
| C | -5.71146500 | -2.19990000 | -0.66348700 |
| C | -4.66067800 | -1.28476600 | -0.72292100 |
| C | -3.54126700 | -1.50135500 | -1.50999400 |
| C | -3.47435600 | -2.71106300 | -2.19429600 |



|    |             |             |             |
|----|-------------|-------------|-------------|
| C  | -4.49952500 | -3.65156600 | -2.15110400 |
| C  | -5.63728800 | -3.38611800 | -1.38510900 |
| C  | -6.79686200 | -1.69508700 | 0.26046400  |
| C  | -6.46159000 | -0.20658200 | 0.42141500  |
| C  | -4.92455700 | -0.14788800 | 0.23896600  |
| H  | -2.71860000 | -0.79328400 | -1.55763500 |
| H  | -4.40973700 | -4.57995600 | -2.70356900 |
| H  | -6.44688700 | -4.10827500 | -1.35634500 |
| H  | -7.80629000 | -1.81786500 | -0.13812100 |
| H  | -6.78057400 | 0.21599200  | 1.38244300  |
| H  | -4.42922400 | -0.34542800 | 1.19680200  |
| H  | -6.75063800 | -2.19948200 | 1.23154800  |
| Br | -1.87113000 | -3.11228500 | -3.14134900 |
| O  | -7.09049500 | 0.48451500  | -0.64657300 |
| C  | -6.85923100 | 1.87730700  | -0.60012800 |
| H  | -7.34203400 | 2.32594300  | -1.46866700 |
| H  | -7.29103100 | 2.31539200  | 0.31072900  |
| N  | -4.50384300 | 1.16973900  | -0.21868000 |
| C  | -3.22886100 | 1.63860300  | -0.31842200 |
| C  | -5.38375600 | 2.13639700  | -0.63444200 |
| N  | -4.74824100 | 3.20958100  | -0.99416300 |
| N  | -3.42791400 | 2.87483700  | -0.78665500 |
| C  | -2.41014200 | 3.82727900  | -1.12558200 |
| C  | -1.76655800 | 3.69695300  | -2.35934200 |
| C  | -2.11503100 | 4.84367100  | -0.21675900 |
| C  | -0.81471500 | 4.65740300  | -2.68781000 |
| C  | -1.11987300 | 5.75605400  | -0.57330300 |
| C  | -0.46274300 | 5.67752700  | -1.80015600 |
| H  | -0.31759200 | 4.60228800  | -3.65268700 |
| H  | -0.85059000 | 6.53883900  | 0.13173700  |
| C  | 0.63083700  | 6.64690500  | -2.16614100 |
| H  | 0.39329200  | 7.17667100  | -3.09316800 |
| H  | 0.78724600  | 7.38670800  | -1.37859200 |
| H  | 1.57306800  | 6.11276900  | -2.32777400 |
| C  | -2.84414900 | 4.94504700  | 1.09507800  |
| H  | -2.89207600 | 3.97034400  | 1.59117000  |
| H  | -2.33654300 | 5.64362100  | 1.76334500  |
| H  | -3.87266200 | 5.28710900  | 0.94236000  |
| C  | -2.04720300 | 2.51742800  | -3.25133200 |
| H  | -1.64407500 | 1.60547000  | -2.79167100 |
| H  | -3.12073400 | 2.36746700  | -3.39978100 |
| H  | -1.57779900 | 2.65037800  | -4.22841500 |

TS1'C'

|    |             |             |             |
|----|-------------|-------------|-------------|
| C  | -5.50560600 | -0.79970000 | -2.45807100 |
| C  | -4.38959600 | -0.81235700 | -1.61601500 |
| C  | -4.38736800 | -0.14304100 | -0.39976200 |
| C  | -5.56512500 | 0.50746900  | -0.04308100 |
| C  | -6.69495800 | 0.51946100  | -0.85398800 |
| C  | -6.66462100 | -0.13730000 | -2.08164000 |
| C  | -5.23097700 | -1.56134600 | -3.73274200 |
| C  | -4.04073300 | -2.43533100 | -3.34355600 |
| C  | -3.27347900 | -1.55860500 | -2.32310200 |
| H  | -3.53879100 | -0.13910700 | 0.27785400  |
| H  | -7.58792200 | 1.03790500  | -0.52395600 |
| H  | -7.53959800 | -0.13619000 | -2.72403200 |
| H  | -6.06721200 | -2.17687700 | -4.07052200 |
| H  | -3.40641700 | -2.74604700 | -4.18375200 |
| H  | -2.61073900 | -0.85592200 | -2.84178900 |
| H  | -4.95096100 | -0.88127500 | -4.54570900 |
| Br | -5.63590700 | 1.43360800  | 1.60582900  |
| O  | -4.57878700 | -3.56448500 | -2.67699000 |
| C  | -3.61508600 | -4.48978400 | -2.23479500 |
| H  | -4.11927800 | -5.21453200 | -1.59858100 |
| H  | -3.13930900 | -5.00176500 | -3.08325600 |
| N  | -2.41528200 | -2.43291200 | -1.51923000 |
| C  | -1.33518300 | -2.11785800 | -0.80105900 |
| C  | -2.55567100 | -3.79176100 | -1.44186000 |
| N  | -1.60076500 | -4.32068800 | -0.72964500 |
| N  | -0.84655100 | -3.25662800 | -0.33785700 |
| C  | 0.39766400  | -3.42384500 | 0.37170700  |
| C  | 0.38754400  | -3.48071200 | 1.76788900  |
| C  | 1.56377100  | -3.54916600 | -0.39338900 |
| C  | 1.62894700  | -3.51197100 | 2.40626300  |
| C  | 2.77413500  | -3.59349100 | 0.29787900  |
| C  | 2.82724500  | -3.53383400 | 1.69283700  |
| H  | 1.65313700  | -3.52519800 | 3.49345000  |
| H  | 3.70141200  | -3.69254200 | -0.26332700 |
| C  | 4.14630200  | -3.51591600 | 2.41755700  |
| H  | 4.19321900  | -4.31121500 | 3.16666100  |
| H  | 4.98059500  | -3.63980200 | 1.72236500  |
| H  | 4.28556400  | -2.56347400 | 2.93985800  |
| C  | 1.51164600  | -3.66131800 | -1.89414200 |
| H  | 0.74053900  | -4.37177300 | -2.20593800 |
| H  | 1.29055400  | -2.68593300 | -2.33403100 |
| H  | 2.47185100  | -4.01498300 | -2.27713300 |
| C  | -0.88744600 | -3.59710700 | 2.55652500  |
| H  | -1.73239900 | -3.09066400 | 2.09011200  |

|   |             |             |             |
|---|-------------|-------------|-------------|
| H | -1.16099800 | -4.65490100 | 2.63971900  |
| H | -0.74720400 | -3.21025900 | 3.56798800  |
| H | -0.88841100 | -1.13698300 | -0.68726900 |
| B | -4.49039100 | -3.13248700 | 1.34286500  |
| F | -3.33425000 | -2.37618200 | 1.00900500  |
| F | -4.25895500 | -3.78112600 | 2.55471200  |
| F | -4.70039900 | -4.07320800 | 0.32185000  |
| F | -5.58423200 | -2.27766300 | 1.43767600  |
| N | -2.39635600 | 0.95039600  | 2.77440900  |
| C | -1.80740900 | 2.27617000  | 2.93050200  |
| C | -2.82701300 | 3.37414000  | 3.21495200  |
| H | -1.29011800 | 2.50107500  | 1.99137400  |
| H | -1.03040300 | 2.30738800  | 3.72007700  |
| H | -2.35911700 | 4.35286400  | 3.07023900  |
| H | -3.68165600 | 3.28357000  | 2.53821600  |
| H | -3.20145500 | 3.33701400  | 4.24125700  |
| C | -3.16015300 | 0.53708900  | 3.94741800  |
| C | -3.77460500 | -0.84790400 | 3.80030000  |
| H | -3.97512400 | 1.25764500  | 4.07815900  |
| H | -2.54666400 | 0.58823000  | 4.86903000  |
| H | -4.43024700 | -1.05061200 | 4.65247300  |
| H | -4.36725200 | -0.90953900 | 2.88471200  |
| H | -3.02546500 | -1.64384800 | 3.76268800  |
| C | -1.38669200 | -0.02722000 | 2.36480500  |
| C | -0.31619100 | -0.36952200 | 3.40715100  |
| H | -0.89695100 | 0.38416100  | 1.47634700  |
| H | -1.90728300 | -0.93616300 | 2.04726200  |
| H | 0.43499200  | -1.03281900 | 2.96637500  |
| H | 0.20257600  | 0.52663500  | 3.75967000  |
| H | -0.74815000 | -0.87702200 | 4.27648900  |
| C | 1.93346600  | 1.42337100  | 1.33098600  |
| C | 1.31270400  | 1.10022000  | 0.17521500  |
| H | 2.71933700  | 0.74532000  | 1.66777200  |
| C | 1.75576400  | -0.12620600 | -0.59127100 |
| H | 2.50362200  | -0.72952400 | -0.04270600 |
| O | 1.00994900  | -0.65564900 | -1.42885400 |
| C | 1.69025300  | 2.55938700  | 2.22104700  |
| C | 2.16379700  | 2.48173500  | 3.54010900  |
| C | 1.03034400  | 3.72783900  | 1.80926300  |
| C | 1.93844600  | 3.51761000  | 4.43942400  |
| H | 2.71051100  | 1.59521100  | 3.85250900  |
| C | 0.81739400  | 4.76754900  | 2.70715600  |
| H | 0.68545400  | 3.81724300  | 0.78471600  |
| C | 1.25753800  | 4.66199200  | 4.02658300  |

|    |             |             |             |
|----|-------------|-------------|-------------|
| H  | 2.29818300  | 3.43536400  | 5.45974600  |
| H  | 0.30575500  | 5.66576200  | 2.37492300  |
| H  | 1.08254000  | 5.47316400  | 4.72578900  |
| C  | 0.14333000  | 1.71749300  | -0.35349600 |
| C  | -0.92740700 | 2.05259000  | -0.81725300 |
| C  | -2.21158500 | 2.40843100  | -1.33329900 |
| C  | -2.57735400 | 2.01315300  | -2.62998600 |
| C  | -3.13126000 | 3.10361700  | -0.53485300 |
| C  | -3.85083400 | 2.29358800  | -3.10928000 |
| H  | -1.85086100 | 1.48802700  | -3.24412700 |
| C  | -4.39865700 | 3.39250100  | -1.02797200 |
| H  | -2.84534900 | 3.40015800  | 0.46927200  |
| C  | -4.76358200 | 2.98045900  | -2.30814400 |
| H  | -4.13445900 | 1.97589100  | -4.10789000 |
| H  | -5.11453800 | 3.90704900  | -0.39529400 |
| H  | -5.76131300 | 3.18802800  | -2.68068300 |
| C  | 6.58980200  | -2.13102100 | -0.60210800 |
| C  | 5.50242200  | -1.26010500 | -0.56675400 |
| C  | 5.17970700  | -0.53438600 | 0.56714100  |
| C  | 5.95776400  | -0.73696100 | 1.69966100  |
| C  | 7.05076800  | -1.59910900 | 1.69976500  |
| C  | 7.37590800  | -2.29650300 | 0.53392100  |
| C  | 6.70754800  | -2.76354000 | -1.97116000 |
| C  | 5.83734100  | -1.86228800 | -2.85986100 |
| C  | 4.77663100  | -1.28279600 | -1.88869700 |
| H  | 4.36139900  | 0.17598800  | 0.56786100  |
| H  | 7.63839300  | -1.72789300 | 2.60147200  |
| H  | 8.23578500  | -2.95865600 | 0.52558500  |
| H  | 7.73024900  | -2.80040500 | -2.35278000 |
| H  | 5.37690800  | -2.39262600 | -3.70279400 |
| H  | 3.90145000  | -1.94351700 | -1.83559400 |
| H  | 6.30988400  | -3.78451800 | -1.96680600 |
| Br | 5.44172500  | 0.14314200  | 3.29804100  |
| O  | 6.66489800  | -0.81495200 | -3.34158500 |
| C  | 5.96981800  | 0.08453800  | -4.18284600 |
| H  | 6.67146000  | 0.85744500  | -4.49714500 |
| H  | 5.58646500  | -0.43073300 | -5.07451800 |
| N  | 4.31424900  | 0.02026900  | -2.33872900 |
| C  | 3.31576100  | 0.75254700  | -1.78040300 |
| C  | 4.83565000  | 0.69090700  | -3.41401400 |
| N  | 4.21305000  | 1.81627800  | -3.59505000 |
| N  | 3.28133400  | 1.82482400  | -2.57762600 |
| C  | 2.32774100  | 2.89385900  | -2.49534100 |
| C  | 2.52902400  | 3.91308200  | -1.56551000 |

|     |             |             |             |
|-----|-------------|-------------|-------------|
| C   | 1.20977900  | 2.83655500  | -3.33285500 |
| C   | 1.55544300  | 4.91249700  | -1.48888500 |
| C   | 0.27831300  | 3.86444100  | -3.23477200 |
| C   | 0.42556400  | 4.89833700  | -2.30567200 |
| H   | 1.68104700  | 5.71136900  | -0.76152600 |
| H   | -0.60718500 | 3.83822500  | -3.86585400 |
| C   | -0.65270800 | 5.94072100  | -2.16710000 |
| H   | -0.89085400 | 6.39472900  | -3.13288400 |
| H   | -1.57176300 | 5.48050600  | -1.78676400 |
| H   | -0.35654000 | 6.73262100  | -1.47628600 |
| C   | 0.98674500  | 1.64387300  | -4.22244900 |
| H   | 1.85501500  | 1.44176400  | -4.85565700 |
| H   | 0.81408400  | 0.75946100  | -3.59556800 |
| H   | 0.11694000  | 1.79787900  | -4.86433800 |
| C   | 3.73172700  | 3.90911300  | -0.66143500 |
| H   | 3.69194200  | 3.05723500  | 0.02737000  |
| H   | 4.65800000  | 3.82214800  | -1.23706900 |
| H   | 3.77109400  | 4.82399000  | -0.06787900 |
| MI' |             |             |             |
| C   | -4.48622600 | -1.59346800 | -0.86411100 |
| C   | -3.14497900 | -1.20338800 | -0.86926300 |
| C   | -2.77855100 | 0.13479000  | -0.91789700 |
| C   | -3.80717200 | 1.07402500  | -0.89905100 |
| C   | -5.15088000 | 0.71079200  | -0.86223700 |
| C   | -5.49546300 | -0.63972900 | -0.85881600 |
| C   | -4.60233900 | -3.09832400 | -0.90296000 |
| C   | -3.23315900 | -3.54017500 | -0.39110700 |
| C   | -2.27070400 | -2.44378700 | -0.91405700 |
| H   | -1.73576000 | 0.41536900  | -1.02072100 |
| H   | -5.91664800 | 1.47785200  | -0.84839400 |
| H   | -6.54024000 | -0.93406600 | -0.84832400 |
| H   | -5.39732000 | -3.50310100 | -0.27312000 |
| H   | -2.93319800 | -4.54880800 | -0.70199100 |
| H   | -1.93401300 | -2.62277900 | -1.93600500 |
| H   | -4.75871400 | -3.45167400 | -1.92788900 |
| Br  | -3.37145900 | 2.92141000  | -0.95336800 |
| O   | -3.31993100 | -3.46767700 | 1.02792600  |
| C   | -2.13818400 | -3.86749300 | 1.67071600  |
| H   | -2.25217900 | -3.68217400 | 2.73970200  |
| H   | -1.94377000 | -4.93888900 | 1.51851800  |
| N   | -1.05190500 | -2.43884300 | -0.07427000 |
| C   | 0.17800600  | -1.94285100 | -0.33064400 |
| C   | -0.97813000 | -3.08883400 | 1.13417900  |

|   |             |             |             |
|---|-------------|-------------|-------------|
| N | 0.21359600  | -3.01040400 | 1.64713700  |
| N | 0.91832300  | -2.29943300 | 0.72119400  |
| C | 2.29083300  | -1.94126300 | 0.94468600  |
| C | 3.28516900  | -2.58661100 | 0.21215000  |
| C | 2.55021600  | -0.88297800 | 1.82600000  |
| C | 4.58184900  | -2.07714300 | 0.31141300  |
| C | 3.85753800  | -0.41348200 | 1.88453100  |
| C | 4.87604000  | -0.97263700 | 1.10686300  |
| H | 5.37292900  | -2.54467100 | -0.27020000 |
| H | 4.08357500  | 0.43063700  | 2.53168500  |
| C | 6.24564500  | -0.35116200 | 1.09377100  |
| H | 6.24732500  | 0.50777000  | 0.41179800  |
| H | 6.52894200  | 0.01073900  | 2.08510000  |
| H | 7.00287500  | -1.05856500 | 0.74921100  |
| C | 1.46990400  | -0.28683100 | 2.68832000  |
| H | 0.50962500  | -0.25068600 | 2.17038800  |
| H | 1.33753500  | -0.88267600 | 3.59705900  |
| H | 1.73396600  | 0.73170100  | 2.98024100  |
| C | 3.00112500  | -3.76102500 | -0.68768400 |
| H | 2.05490600  | -4.24822700 | -0.44368200 |
| H | 2.96209100  | -3.45002200 | -1.73677900 |
| H | 3.79936600  | -4.50094400 | -0.59581800 |
| C | 2.77076700  | 0.06254000  | -1.71208200 |
| C | 1.50721800  | -0.02337300 | -1.25356400 |
| H | 3.09652600  | -0.76267000 | -2.34647700 |
| C | 0.60063500  | -1.22499600 | -1.65791200 |
| H | 1.31391600  | -1.97262500 | -2.09990800 |
| O | -0.45190700 | -0.91607600 | -2.38092600 |
| C | 3.80170300  | 1.08105000  | -1.47710900 |
| C | 4.95491800  | 1.04324100  | -2.27645300 |
| C | 3.72420000  | 2.05892100  | -0.47174400 |
| C | 5.98230300  | 1.96524300  | -2.10542000 |
| H | 5.03670700  | 0.28032000  | -3.04625800 |
| C | 4.75504500  | 2.97571800  | -0.29639800 |
| H | 2.86167600  | 2.08754100  | 0.18373900  |
| C | 5.88440100  | 2.94015700  | -1.11463700 |
| H | 6.85980800  | 1.92003200  | -2.74250100 |
| H | 4.67793400  | 3.72234000  | 0.48791300  |
| H | 6.68398500  | 3.66032400  | -0.97453700 |
| C | 0.83919600  | 0.93395400  | -0.43856600 |
| C | 0.14663900  | 1.62383000  | 0.28359800  |
| C | -0.70012900 | 2.40771100  | 1.12740900  |
| C | -1.70746300 | 1.77691400  | 1.87374200  |
| C | -0.57410500 | 3.80314300  | 1.17400800  |

|   |             |            |            |
|---|-------------|------------|------------|
| C | -2.58575200 | 2.53550900 | 2.63711000 |
| H | -1.80955600 | 0.69683000 | 1.82142700 |
| C | -1.45732100 | 4.55385800 | 1.94007100 |
| H | 0.20424400  | 4.28530600 | 0.59186800 |
| C | -2.46611900 | 3.92387700 | 2.66814100 |
| H | -3.37045900 | 2.04344600 | 3.20237700 |
| H | -1.36240200 | 5.63448700 | 1.96595800 |
| H | -3.15803700 | 4.51496800 | 3.25911200 |

MI'C

|    |             |             |             |
|----|-------------|-------------|-------------|
| C  | -3.09066700 | 0.04363700  | 3.21837400  |
| C  | -2.13405700 | -0.31847700 | 2.26973400  |
| C  | -0.79827900 | -0.50398600 | 2.61008300  |
| C  | -0.45857200 | -0.30815500 | 3.94499300  |
| C  | -1.40055800 | 0.02211100  | 4.91804800  |
| C  | -2.73155800 | 0.19702000  | 4.55242300  |
| C  | -4.43292400 | 0.29271700  | 2.57363600  |
| C  | -4.28416000 | -0.29666600 | 1.16837400  |
| C  | -2.76057400 | -0.25193800 | 0.89690000  |
| H  | -0.03142200 | -0.78695200 | 1.89161000  |
| H  | -1.08672300 | 0.14840700  | 5.94770000  |
| H  | -3.47117500 | 0.46181200  | 5.30149400  |
| H  | -5.26845200 | -0.18070700 | 3.09442900  |
| H  | -4.84388600 | 0.25730800  | 0.40294300  |
| H  | -2.45643300 | 0.68349800  | 0.42261100  |
| H  | -4.63967700 | 1.36783600  | 2.51267000  |
| Br | 1.35743400  | -0.44547600 | 4.45927600  |
| O  | -4.74021300 | -1.63749500 | 1.22362300  |
| C  | -4.66398100 | -2.28587700 | -0.02569900 |
| H  | -5.00060500 | -3.31132600 | 0.10493100  |
| H  | -5.27880200 | -1.76822100 | -0.77860400 |
| N  | -2.39834900 | -1.30035200 | -0.05257700 |
| C  | -1.22257000 | -1.50938100 | -0.64964000 |
| C  | -3.24416200 | -2.27979200 | -0.49035700 |
| N  | -2.65627100 | -3.05524500 | -1.35419700 |
| N  | -1.38828400 | -2.56002100 | -1.43380700 |
| C  | -0.42427100 | -3.12408500 | -2.33496700 |
| C  | -0.12313600 | -4.48597000 | -2.21163700 |
| C  | 0.14766700  | -2.29368600 | -3.30562400 |
| C  | 0.78872300  | -5.01709200 | -3.12175400 |
| C  | 1.05214400  | -2.88454000 | -4.18873900 |
| C  | 1.38846000  | -4.23418900 | -4.11006300 |
| H  | 1.05029500  | -6.06965900 | -3.04043200 |
| H  | 1.50522100  | -2.26697900 | -4.95776000 |

|   |             |             |             |
|---|-------------|-------------|-------------|
| C | 2.39444400  | -4.83708700 | -5.05509000 |
| H | 3.32898400  | -5.05732500 | -4.52871000 |
| H | 2.02523800  | -5.77514100 | -5.47815100 |
| H | 2.62668500  | -4.15228200 | -5.87364200 |
| C | -0.18789200 | -0.82837200 | -3.42263400 |
| H | -1.26893800 | -0.66057900 | -3.39422200 |
| H | 0.24745300  | -0.23749200 | -2.60683400 |
| H | 0.19740800  | -0.43620200 | -4.36640900 |
| C | -0.71286900 | -5.33389000 | -1.11781700 |
| H | -0.73440500 | -4.80556800 | -0.16191700 |
| H | -1.74665600 | -5.61119700 | -1.34371400 |
| H | -0.12857500 | -6.24888800 | -1.00044000 |
| H | -0.35620200 | -0.86139100 | -0.55702200 |
| B | -2.23202800 | -4.34899000 | 2.05796500  |
| F | -1.45417500 | -3.35348800 | 1.41843500  |
| F | -1.62002400 | -5.59274000 | 1.85762200  |
| F | -3.51058200 | -4.35719200 | 1.47943500  |
| F | -2.31884900 | -4.06516300 | 3.41739000  |
| N | 2.27046400  | -2.50814500 | 1.95215800  |
| C | 3.47906300  | -1.69838700 | 1.88100200  |
| C | 4.84199300  | -2.40143600 | 1.80541300  |
| H | 3.48718500  | -1.05391700 | 2.77082600  |
| H | 3.36844700  | -1.02057600 | 1.02770800  |
| H | 5.63312700  | -1.64710400 | 1.86952700  |
| H | 4.97860700  | -3.09926900 | 2.63686500  |
| H | 4.98855300  | -2.95651700 | 0.87492600  |
| C | 2.28044100  | -3.46105900 | 3.05340800  |
| C | 0.88739000  | -3.96540300 | 3.40233000  |
| H | 2.69881300  | -2.93658900 | 3.92140700  |
| H | 2.94908000  | -4.31950700 | 2.85990000  |
| H | 0.93055200  | -4.59357900 | 4.29742900  |
| H | 0.21605100  | -3.12533900 | 3.59579600  |
| H | 0.43809400  | -4.55642600 | 2.60064500  |
| C | 1.78260800  | -3.04663700 | 0.68491400  |
| C | 2.45138100  | -4.32990400 | 0.17385500  |
| H | 1.88765900  | -2.25009200 | -0.06474400 |
| H | 0.70633000  | -3.23281300 | 0.79049700  |
| H | 2.10164400  | -4.55398800 | -0.83754200 |
| H | 3.54089300  | -4.24443600 | 0.13950900  |
| H | 2.20284100  | -5.18376000 | 0.81258500  |
| C | 2.02032500  | 1.87102900  | 1.77040900  |
| C | 1.47454000  | 1.55012400  | 0.57737400  |
| H | 1.33530500  | 2.31460700  | 2.49631300  |
| C | 0.00179600  | 1.90622800  | 0.27588000  |



|    |             |             |             |
|----|-------------|-------------|-------------|
| H  | -0.48971100 | 1.93171800  | 1.28221100  |
| O  | -0.59276000 | 1.11319000  | -0.62275700 |
| C  | 3.40780100  | 1.76402700  | 2.23295100  |
| C  | 3.66205400  | 1.95429700  | 3.60062500  |
| C  | 4.49645500  | 1.52488600  | 1.37865400  |
| C  | 4.95162500  | 1.85878200  | 4.10973900  |
| H  | 2.82801500  | 2.14829000  | 4.26872200  |
| C  | 5.78754700  | 1.43851900  | 1.88934200  |
| H  | 4.33129800  | 1.41159700  | 0.31380600  |
| C  | 6.02070800  | 1.59489000  | 3.25492000  |
| H  | 5.12412300  | 1.99546500  | 5.17235400  |
| H  | 6.61691500  | 1.24957700  | 1.21446600  |
| H  | 7.02913300  | 1.52049300  | 3.64879600  |
| C  | 2.12413700  | 0.81146600  | -0.45616300 |
| C  | 2.61325000  | 0.14202800  | -1.34439400 |
| C  | 3.25730400  | -0.64678800 | -2.35302000 |
| C  | 3.94664900  | -1.81685200 | -1.99907500 |
| C  | 3.21941500  | -0.25370700 | -3.69862000 |
| C  | 4.58183400  | -2.57582400 | -2.97483700 |
| H  | 3.97643700  | -2.11991900 | -0.95768600 |
| C  | 3.87975900  | -1.00317400 | -4.66578800 |
| H  | 2.66436100  | 0.63710200  | -3.97087500 |
| C  | 4.55848700  | -2.16719600 | -4.30783600 |
| H  | 5.10402000  | -3.48426400 | -2.69114500 |
| H  | 3.85248000  | -0.68570000 | -5.70338400 |
| H  | 5.06481600  | -2.75628600 | -5.06574900 |
| C  | -4.86405300 | 3.28963100  | -0.28592300 |
| C  | -3.55559400 | 2.89021200  | -0.57136700 |
| C  | -3.28595700 | 1.87878100  | -1.48522800 |
| C  | -4.38033900 | 1.24584000  | -2.06626000 |
| C  | -5.69461300 | 1.62972700  | -1.81060100 |
| C  | -5.93796700 | 2.67044400  | -0.91466000 |
| C  | -4.87670900 | 4.39726300  | 0.74170800  |
| C  | -3.43930800 | 4.91265700  | 0.68546700  |
| C  | -2.61193500 | 3.64538700  | 0.35587900  |
| H  | -2.26271100 | 1.55167700  | -1.65739800 |
| H  | -6.51528700 | 1.11129600  | -2.29312700 |
| H  | -6.95700700 | 2.98105000  | -0.70809600 |
| H  | -5.58275100 | 5.19868300  | 0.51543200  |
| H  | -3.09612600 | 5.41445100  | 1.59834500  |
| H  | -2.42706200 | 3.06344700  | 1.26700200  |
| H  | -5.10440900 | 4.01065100  | 1.74123200  |
| Br | -4.07026500 | -0.27543600 | -3.16002300 |
| O  | -3.37989200 | 5.79425300  | -0.42652800 |

|   |             |            |             |
|---|-------------|------------|-------------|
| C | -2.11122200 | 6.36834900 | -0.62676100 |
| H | -2.13577400 | 6.91743100 | -1.56858900 |
| H | -1.85862500 | 7.06691600 | 0.18303900  |
| N | -1.30346900 | 4.05184100 | -0.16675700 |
| C | -0.13438200 | 3.36962300 | -0.18958400 |
| C | -1.05918300 | 5.30147900 | -0.67393700 |
| N | 0.17907600  | 5.42005200 | -1.04712500 |
| N | 0.73844800  | 4.20814800 | -0.74217400 |
| C | 2.09080500  | 3.95088200 | -1.16654500 |
| C | 2.26196100  | 3.34387600 | -2.40999500 |
| C | 3.14607800  | 4.35740200 | -0.34751700 |
| C | 3.57319200  | 3.12913800 | -2.83316200 |
| C | 4.43471400  | 4.09196300 | -0.80296600 |
| C | 4.66463700  | 3.47796800 | -2.03761600 |
| H | 3.74765700  | 2.66319700 | -3.79902200 |
| H | 5.27899500  | 4.36357300 | -0.17416200 |
| C | 6.07271200  | 3.20301600 | -2.49656800 |
| H | 6.55639100  | 4.12132900 | -2.84370100 |
| H | 6.67591400  | 2.80442100 | -1.67638000 |
| H | 6.08621200  | 2.48209100 | -3.31645100 |
| C | 2.89207900  | 5.04650900 | 0.96360600  |
| H | 2.21141000  | 4.46010000 | 1.58880400  |
| H | 3.82531500  | 5.18337800 | 1.51191800  |
| H | 2.43262200  | 6.02694500 | 0.80366200  |
| C | 1.06668700  | 2.90089100 | -3.21054300 |
| H | 0.52437500  | 2.11407300 | -2.66808100 |
| H | 0.37258300  | 3.73142400 | -3.37714900 |
| H | 1.37117200  | 2.51719900 | -4.18625600 |

MI'C'

|   |             |             |             |
|---|-------------|-------------|-------------|
| C | -5.35500100 | 0.42862200  | 1.81745300  |
| C | -4.15101900 | 0.65503200  | 1.14419200  |
| C | -3.91286000 | 0.13481200  | -0.11989600 |
| C | -4.94500100 | -0.60005900 | -0.69840800 |
| C | -6.15826600 | -0.82337500 | -0.05597000 |
| C | -6.36732600 | -0.30585600 | 1.22022000  |
| C | -5.33314300 | 1.06739900  | 3.18595700  |
| C | -4.23640600 | 2.11858600  | 3.03116400  |
| C | -3.23495300 | 1.44376000  | 2.06136000  |
| H | -2.98828800 | 0.29452100  | -0.66513200 |
| H | -6.93018000 | -1.39865300 | -0.55426500 |
| H | -7.31024500 | -0.47523400 | 1.73082300  |
| H | -6.27768800 | 1.53211000  | 3.47575800  |
| H | -3.76203900 | 2.43363900  | 3.96974300  |

|    |             |             |             |
|----|-------------|-------------|-------------|
| H  | -2.55677800 | 0.77640700  | 2.60690900  |
| H  | -5.05317600 | 0.33875600  | 3.95639700  |
| Br | -4.70790300 | -1.31694200 | -2.43331400 |
| O  | -4.84671500 | 3.22009200  | 2.38010500  |
| C  | -3.97980300 | 4.29592300  | 2.11141400  |
| H  | -4.50659100 | 4.98721200  | 1.45631500  |
| H  | -3.68482800 | 4.80613400  | 3.03947400  |
| N  | -2.40785600 | 2.48246700  | 1.44983600  |
| C  | -1.21287000 | 2.36621800  | 0.86001900  |
| C  | -2.74475200 | 3.80861000  | 1.42184900  |
| N  | -1.80539700 | 4.51589500  | 0.86284700  |
| N  | -0.86228100 | 3.59571300  | 0.51553600  |
| C  | 0.40695800  | 4.00776300  | -0.01989500 |
| C  | 0.48455700  | 4.41105400  | -1.35332100 |
| C  | 1.50314700  | 4.01689200  | 0.85140000  |
| C  | 1.74565800  | 4.77206800  | -1.83628300 |
| C  | 2.72757900  | 4.41682300  | 0.32361700  |
| C  | 2.87493000  | 4.76991100  | -1.02113300 |
| H  | 1.83834600  | 5.06459200  | -2.87893700 |
| H  | 3.58772400  | 4.47118400  | 0.98812100  |
| C  | 4.23376100  | 5.12557800  | -1.56577300 |
| H  | 4.15786200  | 5.60718300  | -2.54226500 |
| H  | 4.76481800  | 5.80084100  | -0.88875400 |
| H  | 4.84659000  | 4.22433000  | -1.68400400 |
| C  | 1.37716400  | 3.59170000  | 2.28947900  |
| H  | 0.48198900  | 4.01365800  | 2.75641900  |
| H  | 1.31107900  | 2.49702000  | 2.33103900  |
| H  | 2.24620500  | 3.92546400  | 2.86151300  |
| C  | -0.73239700 | 4.48218400  | -2.23190300 |
| H  | -1.47929000 | 3.72831700  | -1.97916600 |
| H  | -1.22230600 | 5.45515400  | -2.11656300 |
| H  | -0.44896500 | 4.37385400  | -3.28140800 |
| H  | -0.56401400 | 1.47429800  | 0.76187400  |
| B  | -4.26366900 | 3.29520700  | -1.64346100 |
| F  | -3.08812300 | 2.67049700  | -1.15466800 |
| F  | -3.92182700 | 4.10295200  | -2.72904600 |
| F  | -4.79973300 | 4.07986600  | -0.60936800 |
| F  | -5.17470800 | 2.31418800  | -2.02677400 |
| N  | -1.43023900 | -0.38210300 | -2.85123200 |
| C  | -0.71349200 | -1.64494800 | -2.95511800 |
| C  | -1.47185700 | -2.75155600 | -3.67969600 |
| H  | -0.52783400 | -1.97934200 | -1.93254900 |
| H  | 0.27963600  | -1.52937900 | -3.43448100 |
| H  | -0.95449200 | -3.70293000 | -3.51317400 |

|   |             |             |             |
|---|-------------|-------------|-------------|
| H | -2.48914400 | -2.82715800 | -3.28576300 |
| H | -1.53078700 | -2.58833200 | -4.75923000 |
| C | -1.81100900 | 0.16370900  | -4.14612800 |
| C | -2.61515400 | 1.45182500  | -4.03801600 |
| H | -2.43988600 | -0.58705100 | -4.63828200 |
| H | -0.93098900 | 0.31533000  | -4.80429300 |
| H | -3.01611200 | 1.71953200  | -5.02018600 |
| H | -3.44815000 | 1.32229400  | -3.34181300 |
| H | -2.01629000 | 2.29521000  | -3.68561800 |
| C | -0.73971300 | 0.55571400  | -1.96872100 |
| C | 0.64530000  | 1.05293400  | -2.39905500 |
| H | -0.63459600 | 0.05670100  | -0.99869300 |
| H | -1.39909200 | 1.41475600  | -1.80787400 |
| H | 1.07029400  | 1.65689600  | -1.58850800 |
| H | 1.33360200  | 0.22197500  | -2.58997200 |
| H | 0.59810400  | 1.67527900  | -3.30012300 |
| C | 1.83698900  | -2.29985400 | -0.79332800 |
| C | 1.16813500  | -1.54984300 | 0.11177600  |
| H | 2.77357400  | -1.88730800 | -1.16929000 |
| C | 1.78347700  | -0.23281900 | 0.62197900  |
| H | 2.43439300  | 0.11518300  | -0.21009000 |
| O | 0.93625200  | 0.69781400  | 1.08066500  |
| C | 1.47605000  | -3.58075800 | -1.40992700 |
| C | 2.11561400  | -3.92350700 | -2.61247200 |
| C | 0.53812300  | -4.47702900 | -0.87063900 |
| C | 1.80315800  | -5.10280800 | -3.27830500 |
| H | 2.86859600  | -3.25138600 | -3.01820300 |
| C | 0.23348400  | -5.66031600 | -1.53672500 |
| H | 0.06145600  | -4.25488200 | 0.07693900  |
| C | 0.85431600  | -5.97415000 | -2.74487800 |
| H | 2.30188300  | -5.34414600 | -4.21133000 |
| H | -0.49308400 | -6.34214700 | -1.10548100 |
| H | 0.60817600  | -6.89584000 | -3.26202000 |
| C | -0.15074200 | -1.86413000 | 0.54410700  |
| C | -1.30284700 | -2.16672700 | 0.78015000  |
| C | -2.61569600 | -2.71793300 | 0.90870000  |
| C | -3.41276700 | -2.50390000 | 2.04334400  |
| C | -3.10074900 | -3.51288300 | -0.14125100 |
| C | -4.66402000 | -3.09833300 | 2.13203300  |
| H | -3.04121500 | -1.86967600 | 2.84280700  |
| C | -4.35917800 | -4.09715400 | -0.04688100 |
| H | -2.48015400 | -3.65691500 | -1.02150900 |
| C | -5.13811200 | -3.89765900 | 1.09027800  |
| H | -5.28034900 | -2.92718000 | 3.00900800  |

|    |             |             |             |
|----|-------------|-------------|-------------|
| H  | -4.73393800 | -4.70040000 | -0.86733800 |
| H  | -6.12073100 | -4.35268800 | 1.16215000  |
| C  | 6.22088900  | 1.93628100  | -0.05609900 |
| C  | 5.19511200  | 1.00432300  | 0.09607000  |
| C  | 5.07724700  | -0.08926600 | -0.74276200 |
| C  | 5.97881900  | -0.19968800 | -1.79519900 |
| C  | 6.98661300  | 0.73838700  | -1.99741300 |
| C  | 7.11680300  | 1.81009200  | -1.11115800 |
| C  | 6.17004400  | 2.96171400  | 1.05424900  |
| C  | 5.25705700  | 2.29962200  | 2.09589600  |
| C  | 4.30940000  | 1.41446500  | 1.25027200  |
| H  | 4.32573800  | -0.85139300 | -0.58433300 |
| H  | 7.67368200  | 0.62402400  | -2.82762000 |
| H  | 7.92241100  | 2.52466600  | -1.24560200 |
| H  | 7.14713600  | 3.17706100  | 1.49221500  |
| H  | 4.71176700  | 3.00957200  | 2.73194600  |
| H  | 3.43638600  | 1.98041600  | 0.90011700  |
| H  | 5.74045200  | 3.90690800  | 0.70589600  |
| Br | 5.79736900  | -1.67615200 | -2.97082000 |
| O  | 6.08577600  | 1.46204400  | 2.88978400  |
| C  | 5.38881000  | 0.77414500  | 3.90517700  |
| H  | 6.09782000  | 0.11946500  | 4.41219400  |
| H  | 4.96355400  | 1.47322400  | 4.63832800  |
| N  | 3.80111000  | 0.31310900  | 2.06134900  |
| C  | 2.76337300  | -0.49810100 | 1.78042600  |
| C  | 4.27839700  | -0.02934100 | 3.29638400  |
| N  | 3.60148000  | -1.02169300 | 3.79529600  |
| N  | 2.66418300  | -1.30343400 | 2.83490000  |
| C  | 1.67367100  | -2.32330300 | 3.06123700  |
| C  | 1.93097900  | -3.61824700 | 2.60400200  |
| C  | 0.49416300  | -1.95145900 | 3.70700700  |
| C  | 0.91672600  | -4.55965000 | 2.76755800  |
| C  | -0.47171700 | -2.94055400 | 3.87925800  |
| C  | -0.29459700 | -4.23302600 | 3.38370000  |
| H  | 1.07379900  | -5.56931000 | 2.39589400  |
| H  | -1.40149800 | -2.68558200 | 4.38086200  |
| C  | -1.41108100 | -5.24017300 | 3.45909600  |
| H  | -2.08022100 | -5.03072500 | 4.29670100  |
| H  | -2.00980300 | -5.19670200 | 2.54129600  |
| H  | -1.02643900 | -6.25736300 | 3.56158000  |
| C  | 0.25636000  | -0.52169200 | 4.10787400  |
| H  | 1.04788500  | -0.15362900 | 4.76844300  |
| H  | 0.25187500  | 0.10183500  | 3.20299600  |
| H  | -0.69942200 | -0.42279000 | 4.62642700  |

|      |             |             |             |
|------|-------------|-------------|-------------|
| C    | 3.24073600  | -3.96633600 | 1.95201400  |
| H    | 3.38728200  | -3.38569400 | 1.03468500  |
| H    | 4.08016000  | -3.74915900 | 2.61939700  |
| H    | 3.26896700  | -5.02482600 | 1.68994300  |
| TS2' |             |             |             |
| C    | -5.01663400 | -0.81961700 | -0.30649200 |
| C    | -3.72379900 | -0.29276200 | -0.26702900 |
| C    | -3.42810600 | 0.94137500  | -0.83505600 |
| C    | -4.48945900 | 1.65188500  | -1.39075800 |
| C    | -5.79767900 | 1.17315000  | -1.38813900 |
| C    | -6.06262900 | -0.08428800 | -0.85049200 |
| C    | -5.03269500 | -2.23843400 | 0.20712300  |
| C    | -3.73448700 | -2.32819800 | 1.00477300  |
| C    | -2.77395300 | -1.34078300 | 0.29080700  |
| H    | -2.39743400 | 1.27525800  | -0.91315600 |
| H    | -6.59065300 | 1.76729900  | -1.82783900 |
| H    | -7.07162900 | -0.48451200 | -0.87478600 |
| H    | -5.88984900 | -2.48056400 | 0.83958900  |
| H    | -3.30974800 | -3.33958200 | 1.05608500  |
| H    | -2.28309800 | -1.83533400 | -0.54545500 |
| H    | -5.01361500 | -2.94791800 | -0.62866500 |
| Br   | -4.14636700 | 3.30639000  | -2.26350500 |
| O    | -4.04605300 | -1.86862100 | 2.31264600  |
| C    | -2.92629100 | -1.93266100 | 3.16220300  |
| H    | -3.20848000 | -1.53282400 | 4.13701800  |
| H    | -2.58661100 | -2.97174800 | 3.29010400  |
| N    | -1.72398100 | -0.91589600 | 1.22216200  |
| C    | -0.54695400 | -0.22684400 | 0.98443600  |
| C    | -1.81054900 | -1.12695500 | 2.58156700  |
| N    | -0.81733600 | -0.61630600 | 3.22491700  |
| N    | -0.02084100 | -0.06752000 | 2.24373800  |
| C    | 1.11170500  | 0.70428900  | 2.63970900  |
| C    | 2.38566600  | 0.14078200  | 2.55162100  |
| C    | 0.89902200  | 2.00208000  | 3.11907200  |
| C    | 3.47512300  | 0.92881700  | 2.92081300  |
| C    | 2.01647000  | 2.75407700  | 3.47609400  |
| C    | 3.31011400  | 2.23909200  | 3.37077700  |
| H    | 4.47712500  | 0.51111200  | 2.84256500  |
| H    | 1.87441900  | 3.77118400  | 3.83379200  |
| C    | 4.50267000  | 3.10077800  | 3.69159200  |
| H    | 4.68714900  | 3.80375300  | 2.87120800  |
| H    | 4.33742000  | 3.68950800  | 4.59741100  |
| H    | 5.40384000  | 2.49855500  | 3.82814600  |

|   |             |             |             |
|---|-------------|-------------|-------------|
| C | -0.49524900 | 2.55202300  | 3.25261600  |
| H | -1.10305200 | 2.28355300  | 2.38472100  |
| H | -0.98627600 | 2.14520100  | 4.14251900  |
| H | -0.47570800 | 3.64076100  | 3.33334100  |
| C | 2.58065200  | -1.25609900 | 2.03426900  |
| H | 1.87322300  | -1.95695500 | 2.48740900  |
| H | 2.42019900  | -1.28147700 | 0.94850900  |
| H | 3.59709300  | -1.60478700 | 2.23039800  |
| C | 2.05120100  | 1.61325200  | -0.37055300 |
| C | 0.71397400  | 1.44775400  | -0.32315200 |
| H | 2.67290300  | 0.72921900  | -0.23277500 |
| C | 0.00094400  | 0.09318000  | -0.29489000 |
| H | 1.05383000  | -0.88347000 | -0.71793200 |
| O | -0.76623300 | -0.12043700 | -1.38200800 |
| C | 2.78325100  | 2.88003500  | -0.54059900 |
| C | 4.01869700  | 3.05438400  | 0.10048400  |
| C | 2.31827200  | 3.90629200  | -1.37455000 |
| C | 4.75200300  | 4.22506700  | -0.05917700 |
| H | 4.39748100  | 2.25040300  | 0.72609200  |
| C | 3.05390900  | 5.07696900  | -1.53949000 |
| H | 1.38222200  | 3.77452600  | -1.90718200 |
| C | 4.26973500  | 5.24461700  | -0.87999000 |
| H | 5.70504200  | 4.33912400  | 0.44990600  |
| H | 2.67920100  | 5.85758100  | -2.19428500 |
| H | 4.84182700  | 6.15743400  | -1.01125300 |
| C | -0.19168200 | 2.55908700  | -0.29376800 |
| C | -1.02822400 | 3.42129200  | -0.11011100 |
| C | -2.04466900 | 4.39563600  | 0.14175000  |
| C | -3.15748400 | 4.04962900  | 0.92406700  |
| C | -1.97150000 | 5.67619700  | -0.42331100 |
| C | -4.18288400 | 4.96545100  | 1.12235200  |
| H | -3.22000900 | 3.04928000  | 1.34188700  |
| C | -3.00302900 | 6.58607800  | -0.22267600 |
| H | -1.10888000 | 5.93973900  | -1.02683500 |
| C | -4.11119800 | 6.23300500  | 0.54646200  |
| H | -5.04490100 | 4.68709400  | 1.72001000  |
| H | -2.94431100 | 7.57333600  | -0.66953100 |
| H | -4.91641400 | 6.94474000  | 0.69700500  |
| C | -1.65038700 | -4.78352500 | -1.07132100 |
| C | -0.72167200 | -3.76948300 | -0.83008400 |
| C | -0.19822500 | -3.54279200 | 0.43357900  |
| C | -0.62932400 | -4.37707300 | 1.46202600  |
| C | -1.53767800 | -5.41048400 | 1.24649500  |
| C | -2.05806300 | -5.61342300 | -0.03395500 |

|                  |             |             |             |
|------------------|-------------|-------------|-------------|
| C                | -2.05794300 | -4.77458100 | -2.52740100 |
| C                | -0.91758300 | -3.99847600 | -3.19607600 |
| C                | -0.46157500 | -3.00082100 | -2.10679100 |
| H                | 0.51315300  | -2.74338100 | 0.62572900  |
| H                | -1.83874400 | -6.04424500 | 2.07271400  |
| H                | -2.76675100 | -6.41704200 | -0.20715900 |
| H                | -2.15899100 | -5.76924400 | -2.96640700 |
| H                | -1.20389500 | -3.49955600 | -4.12956000 |
| H                | -0.99819000 | -2.03772500 | -2.11243700 |
| H                | -3.00509300 | -4.24005500 | -2.66228800 |
| Br               | 0.02658900  | -4.07081900 | 3.21313100  |
| O                | 0.11536200  | -4.94733200 | -3.44350000 |
| C                | 1.26405100  | -4.38021200 | -4.03378200 |
| H                | 2.00911300  | -5.16880800 | -4.14321300 |
| H                | 1.03613600  | -3.96832300 | -5.02692700 |
| N                | 0.93853500  | -2.64763100 | -2.29217300 |
| C                | 1.61140800  | -1.66098500 | -1.66108600 |
| C                | 1.78662700  | -3.28701100 | -3.15297500 |
| N                | 2.97781600  | -2.76793400 | -3.09743100 |
| N                | 2.84395500  | -1.77144200 | -2.16340100 |
| C                | 3.98070200  | -0.97866600 | -1.79763500 |
| C                | 4.84970100  | -1.48075600 | -0.82530300 |
| C                | 4.15084000  | 0.26133100  | -2.41599400 |
| C                | 5.90564700  | -0.66014200 | -0.43017800 |
| C                | 5.23378300  | 1.03466300  | -2.00212800 |
| C                | 6.10416800  | 0.59975100  | -1.00139900 |
| H                | 6.58969200  | -1.01449900 | 0.33733000  |
| H                | 5.37773900  | 2.01706300  | -2.44496600 |
| C                | 7.20936200  | 1.49420200  | -0.50480000 |
| H                | 7.41434400  | 2.30131700  | -1.21101000 |
| H                | 6.92538600  | 1.95200200  | 0.45002400  |
| H                | 8.13138900  | 0.93209500  | -0.33696900 |
| C                | 3.17033100  | 0.75001000  | -3.44779500 |
| H                | 3.08220600  | 0.03817700  | -4.27429900 |
| H                | 2.17473400  | 0.86919000  | -3.00515900 |
| H                | 3.48567600  | 1.71504800  | -3.84744200 |
| C                | 4.66734500  | -2.86630100 | -0.26387400 |
| H                | 3.62634600  | -3.06001400 | 0.01245300  |
| H                | 4.94789000  | -3.61802300 | -1.00824400 |
| H                | 5.29152800  | -3.00937100 | 0.61983200  |
| TS2 <sup>N</sup> |             |             |             |
| C                | 3.52692500  | -3.29148800 | -0.56013000 |
| C                | 2.49630600  | -2.42559000 | -0.19748700 |



|    |             |             |             |
|----|-------------|-------------|-------------|
| C  | 2.71093900  | -1.06756000 | -0.01484700 |
| C  | 3.97671500  | -0.58157600 | -0.32590400 |
| C  | 5.01663400  | -1.41562300 | -0.72917900 |
| C  | 4.79713700  | -2.79085600 | -0.82122500 |
| C  | 3.02939900  | -4.71794800 | -0.55940700 |
| C  | 1.51316200  | -4.55280800 | -0.71140900 |
| C  | 1.20371000  | -3.19216700 | -0.02137400 |
| H  | 1.93241700  | -0.43505500 | 0.40212100  |
| H  | 5.98897400  | -0.99535500 | -0.95967500 |
| H  | 5.60985700  | -3.45051300 | -1.10892200 |
| H  | 3.42578400  | -5.33475300 | -1.36899200 |
| H  | 0.92969600  | -5.37296100 | -0.27163300 |
| H  | 0.98542900  | -3.32595000 | 1.03925500  |
| H  | 3.26708700  | -5.20666700 | 0.39162600  |
| Br | 4.26652900  | 1.29337600  | -0.20276000 |
| O  | 1.27830200  | -4.50039900 | -2.11179900 |
| C  | -0.07627300 | -4.26548900 | -2.42456100 |
| H  | -0.18501300 | -4.27035300 | -3.50908200 |
| H  | -0.71730100 | -5.05000300 | -1.99483500 |
| N  | 0.04245700  | -2.54578300 | -0.65076500 |
| C  | -0.49493800 | -1.29714900 | -0.37213900 |
| C  | -0.45482800 | -2.93124700 | -1.87541900 |
| N  | -1.21222600 | -2.03886000 | -2.41517800 |
| N  | -1.21943000 | -0.98861100 | -1.50394600 |
| C  | -1.59655000 | 0.30729900  | -1.98049100 |
| C  | -2.94672900 | 0.57965500  | -2.22913700 |
| C  | -0.59939300 | 1.26962400  | -2.20238400 |
| C  | -3.29241600 | 1.85767100  | -2.66826800 |
| C  | -0.99959500 | 2.54015700  | -2.61458400 |
| C  | -2.33936300 | 2.85835300  | -2.84136900 |
| H  | -4.34109100 | 2.07919200  | -2.85571800 |
| H  | -0.23649000 | 3.29732300  | -2.78288400 |
| C  | -2.74753000 | 4.25179700  | -3.24017000 |
| H  | -3.01385700 | 4.83303500  | -2.35052500 |
| H  | -1.93523000 | 4.77379000  | -3.75119100 |
| H  | -3.61960300 | 4.23686100  | -3.89836900 |
| C  | 0.86355900  | 0.96874700  | -2.00910400 |
| H  | 1.16545900  | 1.12853500  | -0.96920800 |
| H  | 1.10229600  | -0.06712300 | -2.26853100 |
| H  | 1.47053700  | 1.62941700  | -2.63272300 |
| C  | -4.03116000 | -0.43903100 | -1.99416800 |
| H  | -4.80009800 | -0.35996600 | -2.76636500 |
| H  | -3.64626300 | -1.45936700 | -1.99179300 |
| H  | -4.52250000 | -0.24934800 | -1.03190900 |

|   |             |             |             |
|---|-------------|-------------|-------------|
| C | -2.34408400 | 0.95511800  | 0.88563900  |
| C | -1.03432300 | 0.67482900  | 1.05426000  |
| H | -2.98668800 | 0.08878300  | 0.72438000  |
| C | -0.51363500 | -0.75116300 | 0.95976100  |
| H | -1.59421300 | -1.57105500 | 1.24880300  |
| O | 0.39947500  | -1.13217900 | 1.83722800  |
| C | -3.05191100 | 2.23415000  | 0.79631900  |
| C | -4.45498200 | 2.20804600  | 0.84841700  |
| C | -2.41725100 | 3.47021600  | 0.59526900  |
| C | -5.20357900 | 3.37129900  | 0.71590300  |
| H | -4.95823200 | 1.25427000  | 0.99386300  |
| C | -3.16761800 | 4.63459800  | 0.46894800  |
| H | -1.33771900 | 3.51263500  | 0.51669000  |
| C | -4.56037100 | 4.59321700  | 0.52607600  |
| H | -6.28709500 | 3.32530400  | 0.75866500  |
| H | -2.66031100 | 5.58205600  | 0.31323000  |
| H | -5.13906000 | 5.50518000  | 0.42045700  |
| C | -0.01352600 | 1.64324300  | 1.30819100  |
| C | 0.94155300  | 2.37691300  | 1.46379000  |
| C | 2.08449700  | 3.23572900  | 1.53454900  |
| C | 2.34226900  | 4.12519300  | 0.48068400  |
| C | 2.99353400  | 3.13852100  | 2.59639700  |
| C | 3.50601200  | 4.88471300  | 0.47953600  |
| H | 1.63751700  | 4.18647900  | -0.34319600 |
| C | 4.15131600  | 3.90770400  | 2.59164400  |
| H | 2.79347100  | 2.44247300  | 3.40383400  |
| C | 4.41503900  | 4.77425800  | 1.53179900  |
| H | 3.70768500  | 5.56047400  | -0.34523000 |
| H | 4.85670500  | 3.82226800  | 3.41169500  |
| H | 5.32546400  | 5.36456200  | 1.52651400  |
| N | -2.44483700 | -2.49991700 | 1.81878300  |
| C | -3.09215900 | -1.85368800 | 2.98134300  |
| C | -2.07392100 | -1.32260600 | 3.98402500  |
| H | -3.79067200 | -2.55083800 | 3.46175400  |
| H | -3.68482700 | -1.02481100 | 2.58218700  |
| H | -2.57380700 | -0.64229600 | 4.67704300  |
| H | -1.62692100 | -2.12827100 | 4.57195100  |
| H | -1.26125700 | -0.79937400 | 3.47243200  |
| C | -3.37982100 | -2.80244500 | 0.71621000  |
| C | -4.32308500 | -3.98437400 | 0.90765900  |
| H | -2.76975000 | -2.95922900 | -0.18392900 |
| H | -3.96328100 | -1.89129400 | 0.54839300  |
| H | -5.03822100 | -4.00040100 | 0.08143100  |
| H | -3.78519600 | -4.93464400 | 0.89805100  |

|     |             |             |             |
|-----|-------------|-------------|-------------|
| H   | -4.88865800 | -3.90799000 | 1.84004500  |
| C   | -1.53252400 | -3.61639300 | 2.17919500  |
| C   | -2.05251600 | -4.62662200 | 3.19991000  |
| H   | -0.61681600 | -3.13760700 | 2.53951700  |
| H   | -1.28504400 | -4.12319600 | 1.23859600  |
| H   | -1.28544200 | -5.39134000 | 3.34610200  |
| H   | -2.24035500 | -4.16409600 | 4.17126500  |
| H   | -2.96757900 | -5.12550200 | 2.87910500  |
| M2' |             |             |             |
| C   | -5.87041200 | -0.26447000 | -0.70424500 |
| C   | -4.52816500 | -0.03030300 | -0.41010800 |
| C   | -4.01933300 | 1.25643600  | -0.31551400 |
| C   | -4.91765100 | 2.30619600  | -0.44945900 |
| C   | -6.26877500 | 2.10769400  | -0.71948300 |
| C   | -6.74671100 | 0.80356500  | -0.86725300 |
| C   | -6.11654400 | -1.75100400 | -0.82738300 |
| C   | -4.94110200 | -2.35820300 | -0.05200300 |
| C   | -3.78300100 | -1.34042300 | -0.24880300 |
| H   | -2.95599300 | 1.41880500  | -0.19861200 |
| H   | -6.93592600 | 2.95646600  | -0.81800300 |
| H   | -7.79531500 | 0.63653300  | -1.09401800 |
| H   | -7.06687800 | -2.08626200 | -0.40564200 |
| H   | -4.65687900 | -3.36333100 | -0.39121100 |
| H   | -3.21344300 | -1.56958600 | -1.15361400 |
| H   | -6.07955000 | -2.06169000 | -1.87769600 |
| Br  | -4.23855700 | 4.07438700  | -0.24225700 |
| O   | -5.36724400 | -2.41593300 | 1.30328200  |
| C   | -4.34525900 | -2.85332100 | 2.17341800  |
| H   | -4.75137000 | -2.89951200 | 3.18406500  |
| H   | -3.98201100 | -3.85205500 | 1.88016600  |
| N   | -2.86499300 | -1.37351500 | 0.88489700  |
| C   | -1.68324000 | -0.63615700 | 1.06846300  |
| C   | -3.20396200 | -1.89781900 | 2.10419000  |
| N   | -2.41359700 | -1.55100200 | 3.06023800  |
| N   | -1.47702300 | -0.71971800 | 2.45271600  |
| C   | -0.71039000 | 0.15233900  | 3.26243300  |
| C   | 0.26768900  | -0.41144000 | 4.09887200  |
| C   | -0.87904200 | 1.54539300  | 3.18474300  |
| C   | 1.08948500  | 0.43793800  | 4.83683300  |
| C   | -0.01679000 | 2.35272500  | 3.92612600  |
| C   | 0.98220500  | 1.82395900  | 4.74403400  |
| H   | 1.85989600  | 0.00276800  | 5.47019000  |
| H   | -0.13719700 | 3.43274600  | 3.86552900  |

|   |             |             |             |
|---|-------------|-------------|-------------|
| C | 1.94477500  | 2.72281600  | 5.47491700  |
| H | 2.86816900  | 2.83434100  | 4.89511800  |
| H | 1.52251500  | 3.71904800  | 5.62715700  |
| H | 2.21495600  | 2.30870400  | 6.44974600  |
| C | -1.94194100 | 2.18931100  | 2.33418000  |
| H | -1.57210100 | 2.38114300  | 1.31976000  |
| H | -2.82583200 | 1.55221100  | 2.24269200  |
| H | -2.24390300 | 3.14537400  | 2.76939300  |
| C | 0.44791600  | -1.90283000 | 4.17802400  |
| H | -0.28218700 | -2.35250300 | 4.85908900  |
| H | 0.28659900  | -2.37142400 | 3.20342100  |
| H | 1.45064800  | -2.14760900 | 4.53649700  |
| C | 1.26963000  | -0.06989500 | 1.16046600  |
| C | 0.34334700  | 0.54750400  | 0.34482200  |
| H | 1.00059400  | -1.06691200 | 1.50717500  |
| C | -0.98012900 | -0.00506200 | 0.04328400  |
| H | 2.19878200  | -0.50520500 | -0.72036800 |
| O | -1.51610200 | 0.16059700  | -1.14012600 |
| C | 2.52845800  | 0.43588900  | 1.68496700  |
| C | 3.47418300  | -0.49099100 | 2.17414800  |
| C | 2.84824400  | 1.80455200  | 1.78331200  |
| C | 4.66898700  | -0.07583500 | 2.74402800  |
| H | 3.24213300  | -1.55279900 | 2.11365200  |
| C | 4.05577100  | 2.21567700  | 2.33931800  |
| H | 2.12766200  | 2.54364900  | 1.45172600  |
| C | 4.96858300  | 1.28497600  | 2.83386300  |
| H | 5.37420400  | -0.81465000 | 3.11477300  |
| H | 4.27396000  | 3.27785700  | 2.40991400  |
| H | 5.90181500  | 1.61502100  | 3.28026200  |
| C | 0.61461800  | 1.76028100  | -0.37099900 |
| C | 0.70528200  | 2.80233000  | -0.99137100 |
| C | 0.71346100  | 4.04622000  | -1.69804400 |
| C | -0.50430900 | 4.70276400  | -1.94577900 |
| C | 1.90986300  | 4.62496800  | -2.14704200 |
| C | -0.51638400 | 5.91055300  | -2.63245500 |
| H | -1.42807800 | 4.26421600  | -1.58009900 |
| C | 1.88722300  | 5.83308000  | -2.83451900 |
| H | 2.85034400  | 4.12041400  | -1.95034100 |
| C | 0.67618900  | 6.47793500  | -3.08087400 |
| H | -1.46077700 | 6.41243600  | -2.81716800 |
| H | 2.81755800  | 6.27326400  | -3.17854300 |
| H | 0.66186100  | 7.42105800  | -3.61720200 |
| C | -1.37168600 | -2.78473500 | -2.96932300 |
| C | -0.34023300 | -2.30348400 | -2.16454700 |

|    |             |             |             |
|----|-------------|-------------|-------------|
| C  | -0.15210100 | -2.75581700 | -0.86697400 |
| C  | -1.04540200 | -3.71404300 | -0.39679500 |
| C  | -2.06117100 | -4.24031300 | -1.18849900 |
| C  | -2.22914300 | -3.76900000 | -2.49236300 |
| C  | -1.41181100 | -2.03463800 | -4.27985400 |
| C  | -0.02689300 | -1.38824100 | -4.35751900 |
| C  | 0.35774600  | -1.16799800 | -2.87641600 |
| H  | 0.63391000  | -2.37206300 | -0.22437400 |
| H  | -2.72065300 | -5.00046600 | -0.78405400 |
| H  | -3.02916000 | -4.16211100 | -3.11212300 |
| H  | -1.59314100 | -2.66329500 | -5.15444700 |
| H  | -0.00022000 | -0.45939600 | -4.93951800 |
| H  | -0.04726900 | -0.23011100 | -2.46371500 |
| H  | -2.18175800 | -1.25629500 | -4.24482800 |
| Br | -0.91039600 | -4.25928500 | 1.41167700  |
| O  | 0.84320100  | -2.35322200 | -4.94396400 |
| C  | 2.16171900  | -1.88576300 | -5.09782100 |
| H  | 2.76307200  | -2.69316500 | -5.51678200 |
| H  | 2.20527300  | -1.02124000 | -5.77458900 |
| N  | 1.82294900  | -1.15957700 | -2.75556900 |
| C  | 2.56431800  | -0.81520100 | -1.69989900 |
| C  | 2.69744400  | -1.48908700 | -3.75588100 |
| N  | 3.93489400  | -1.36128400 | -3.35949900 |
| N  | 3.82742300  | -0.94137500 | -2.06898500 |
| C  | 4.97562600  | -0.67299600 | -1.24482400 |
| C  | 5.71420400  | -1.76109500 | -0.77709600 |
| C  | 5.26941300  | 0.65804400  | -0.93767600 |
| C  | 6.80540300  | -1.47716900 | 0.04124200  |
| C  | 6.37322300  | 0.88370400  | -0.11942100 |
| C  | 7.14175600  | -0.16648700 | 0.38396300  |
| H  | 7.39936800  | -2.30127400 | 0.42773200  |
| H  | 6.62596700  | 1.90655800  | 0.14696500  |
| C  | 8.27986900  | 0.11146800  | 1.32847500  |
| H  | 8.77243300  | 1.05670700  | 1.08993800  |
| H  | 7.90206400  | 0.18597600  | 2.35448900  |
| H  | 9.02393500  | -0.68733100 | 1.30465400  |
| C  | 4.43405900  | 1.79568400  | -1.46289500 |
| H  | 4.25954900  | 1.70234900  | -2.53965100 |
| H  | 3.45833900  | 1.83619600  | -0.96438600 |
| H  | 4.93966000  | 2.74512000  | -1.27626400 |
| C  | 5.33346400  | -3.17332300 | -1.13339300 |
| H  | 4.28876600  | -3.37606100 | -0.87510900 |
| H  | 5.44555500  | -3.35455300 | -2.20592200 |
| H  | 5.96156400  | -3.88400500 | -0.59515100 |

M2<sup>H</sup>

|    |             |             |             |
|----|-------------|-------------|-------------|
| C  | -4.99213900 | 0.16009600  | -0.71518500 |
| C  | -3.61248200 | -0.06285200 | -0.73927600 |
| C  | -2.71044100 | 0.98557300  | -0.60885300 |
| C  | -3.23802000 | 2.26491400  | -0.45133400 |
| C  | -4.60619100 | 2.51276000  | -0.43137300 |
| C  | -5.49451100 | 1.44526000  | -0.56538800 |
| C  | -5.73890800 | -1.14737300 | -0.84852000 |
| C  | -4.68241400 | -2.17626100 | -0.43813400 |
| C  | -3.35759900 | -1.54847700 | -0.93628800 |
| H  | -1.63698500 | 0.83051800  | -0.61895200 |
| H  | -4.97157600 | 3.52514000  | -0.30380700 |
| H  | -6.56459800 | 1.62513200  | -0.53603900 |
| H  | -6.61983200 | -1.21892300 | -0.20700100 |
| H  | -4.84401000 | -3.17879200 | -0.85506900 |
| H  | -3.22696600 | -1.76090900 | -2.00018700 |
| H  | -6.05187400 | -1.31933100 | -1.88428600 |
| Br | -2.03493700 | 3.72279500  | -0.26450500 |
| O  | -4.70849600 | -2.22876100 | 0.98071100  |
| C  | -3.70865900 | -3.07458000 | 1.51116400  |
| H  | -3.77829100 | -3.04400700 | 2.59833500  |
| H  | -3.85980200 | -4.10943700 | 1.17042000  |
| N  | -2.22128700 | -2.10109300 | -0.21000200 |
| C  | -0.88393500 | -1.73473900 | -0.35985600 |
| C  | -2.36415200 | -2.59639400 | 1.06908600  |
| N  | -1.25924600 | -2.61851100 | 1.72589300  |
| N  | -0.31623700 | -2.10086400 | 0.84651600  |
| C  | 1.06396900  | -2.20220100 | 1.17530900  |
| C  | 1.91481100  | -2.98849100 | 0.39040500  |
| C  | 1.52859700  | -1.49612000 | 2.29601100  |
| C  | 3.27559000  | -2.99370700 | 0.71210000  |
| C  | 2.88584000  | -1.55842700 | 2.59191000  |
| C  | 3.78047100  | -2.28053400 | 1.79613200  |
| H  | 3.95180000  | -3.58999300 | 0.10368600  |
| H  | 3.26023400  | -1.00341500 | 3.44959800  |
| C  | 5.25611400  | -2.26830500 | 2.10241600  |
| H  | 5.71283800  | -1.33093500 | 1.76657500  |
| H  | 5.43789400  | -2.35282200 | 3.17687600  |
| H  | 5.77297400  | -3.08791300 | 1.59874900  |
| C  | 0.58887400  | -0.66838900 | 3.12937500  |
| H  | -0.06973100 | -0.07670100 | 2.48528600  |
| H  | -0.04995400 | -1.30195500 | 3.75117800  |
| H  | 1.14906700  | 0.01453500  | 3.77233900  |

|      |             |             |             |
|------|-------------|-------------|-------------|
| C    | 1.41169000  | -3.82519500 | -0.75675400 |
| H    | 0.39415800  | -4.18062300 | -0.57324500 |
| H    | 1.40385600  | -3.24984700 | -1.68870900 |
| H    | 2.06088100  | -4.69180900 | -0.89860200 |
| C    | 1.69609500  | -0.55947400 | -2.73077200 |
| C    | 0.96597500  | -0.53269800 | -1.58218400 |
| H    | 1.25543700  | -1.10787400 | -3.56049200 |
| C    | -0.32177200 | -1.21143900 | -1.49661300 |
| H    | -0.94257300 | -2.26653800 | -2.99461000 |
| O    | -1.04292600 | -1.35606300 | -2.68443700 |
| C    | 2.97022800  | 0.10148100  | -3.01668300 |
| C    | 3.28101900  | 0.41671700  | -4.35026500 |
| C    | 3.93070700  | 0.38657900  | -2.03077900 |
| C    | 4.48326800  | 1.02899500  | -4.68434700 |
| H    | 2.55821200  | 0.18330800  | -5.12758800 |
| C    | 5.13372400  | 0.99727900  | -2.36691800 |
| H    | 3.73928900  | 0.10259600  | -1.00200600 |
| C    | 5.41452400  | 1.32919800  | -3.69152800 |
| H    | 4.69490100  | 1.27103000  | -5.72116400 |
| H    | 5.86223700  | 1.20560400  | -1.58923700 |
| H    | 6.35479500  | 1.80587000  | -3.94893900 |
| C    | 1.32179800  | 0.30491900  | -0.47145900 |
| C    | 1.56014300  | 1.06540600  | 0.44313900  |
| C    | 1.90576700  | 1.88871900  | 1.56364600  |
| C    | 0.97085300  | 2.77644600  | 2.11551500  |
| C    | 3.17813100  | 1.77616100  | 2.14437400  |
| C    | 1.30284600  | 3.52689900  | 3.23752600  |
| H    | -0.00455100 | 2.87535900  | 1.65006600  |
| C    | 3.50130900  | 2.52967500  | 3.26717800  |
| H    | 3.89607700  | 1.08450600  | 1.71459600  |
| C    | 2.56398700  | 3.40214000  | 3.81891900  |
| H    | 0.57405000  | 4.21013300  | 3.66117600  |
| H    | 4.48559700  | 2.43440100  | 3.71405000  |
| H    | 2.81735500  | 3.98637600  | 4.69747200  |
| TS3' |             |             |             |
| C    | -5.84147100 | 0.30906600  | -0.84445600 |
| C    | -4.66489200 | 0.15017500  | -0.10820900 |
| C    | -4.54798500 | 0.63543700  | 1.18516500  |
| C    | -5.66012500 | 1.27370800  | 1.72608300  |
| C    | -6.84253700 | 1.45035000  | 1.01369500  |
| C    | -6.93204700 | 0.96651200  | -0.29155500 |
| C    | -5.69832900 | -0.33002400 | -2.20701500 |
| C    | -4.56111800 | -1.32097800 | -1.96877500 |

|    |             |             |             |
|----|-------------|-------------|-------------|
| C  | -3.64369500 | -0.57749000 | -0.96668400 |
| H  | -3.60933400 | 0.55732500  | 1.72011500  |
| H  | -7.68300400 | 1.95533800  | 1.47587500  |
| H  | -7.85194600 | 1.09164200  | -0.85410500 |
| H  | -6.59788600 | -0.84175300 | -2.55507100 |
| H  | -4.02807400 | -1.64149800 | -2.87039500 |
| H  | -2.98806300 | 0.14020200  | -1.46687400 |
| H  | -5.40037200 | 0.40645900  | -2.96272200 |
| Br | -5.55319800 | 1.93773500  | 3.50438300  |
| O  | -5.14974800 | -2.44742600 | -1.32942300 |
| C  | -4.21280900 | -3.45471000 | -1.03815000 |
| H  | -4.71907100 | -4.24041500 | -0.47642200 |
| H  | -3.79470600 | -3.88301200 | -1.96107400 |
| N  | -2.79256100 | -1.55109500 | -0.27791700 |
| C  | -1.60950400 | -1.36992000 | 0.37967700  |
| C  | -3.07947000 | -2.88875900 | -0.24067900 |
| N  | -2.20194700 | -3.54901600 | 0.44759200  |
| N  | -1.30444200 | -2.59770200 | 0.85456000  |
| C  | -0.31440300 | -2.96865700 | 1.81987200  |
| C  | 0.64709200  | -3.91327200 | 1.44667600  |
| C  | -0.37538800 | -2.41653700 | 3.10417600  |
| C  | 1.58649200  | -4.28969800 | 2.40280700  |
| C  | 0.59074500  | -2.82854700 | 4.02187900  |
| C  | 1.58179000  | -3.75121500 | 3.68884200  |
| H  | 2.35965600  | -5.00198900 | 2.12464500  |
| H  | 0.56347400  | -2.41402400 | 5.02683500  |
| C  | 2.64652300  | -4.14169500 | 4.67938300  |
| H  | 3.60150800  | -3.69071600 | 4.39007400  |
| H  | 2.39794500  | -3.80120400 | 5.68690600  |
| H  | 2.78542500  | -5.22601900 | 4.70448700  |
| C  | -1.43176900 | -1.42415900 | 3.51517200  |
| H  | -1.13508900 | -0.40538500 | 3.24492200  |
| H  | -2.39194000 | -1.62692600 | 3.03085800  |
| H  | -1.58168500 | -1.46316500 | 4.59586900  |
| C  | 0.68527200  | -4.51132000 | 0.06535600  |
| H  | 0.08092300  | -5.42305100 | 0.02091600  |
| H  | 0.28982600  | -3.82926000 | -0.69197000 |
| H  | 1.71390100  | -4.76826900 | -0.19735500 |
| C  | 1.38040100  | -0.97751400 | 0.27915900  |
| C  | 0.41164300  | -0.02301700 | 0.81445900  |
| H  | 0.95191900  | -1.74774100 | -0.36490700 |
| C  | -0.97459700 | -0.05461900 | 0.59078800  |
| H  | 1.94641400  | 0.09402200  | -0.69575300 |
| O  | -1.76835600 | 0.95294200  | 0.53992600  |



|    |             |             |             |
|----|-------------|-------------|-------------|
| C  | 2.59141400  | -1.40686700 | 0.96430800  |
| C  | 3.46365700  | -2.31027200 | 0.31203400  |
| C  | 2.99148100  | -0.95121600 | 2.23700200  |
| C  | 4.63064000  | -2.76233200 | 0.90650600  |
| H  | 3.19214300  | -2.66276000 | -0.68245800 |
| C  | 4.17996800  | -1.38534300 | 2.81954600  |
| H  | 2.34474400  | -0.27082400 | 2.78243600  |
| C  | 5.00610600  | -2.30308200 | 2.17297900  |
| H  | 5.26532000  | -3.46663600 | 0.37327600  |
| H  | 4.45083600  | -1.01758900 | 3.80687500  |
| H  | 5.92482200  | -2.64787500 | 2.63850000  |
| C  | 0.88508300  | 1.22800700  | 1.31656900  |
| C  | 1.28007300  | 2.30192200  | 1.73816900  |
| C  | 1.74569400  | 3.57474100  | 2.19346800  |
| C  | 1.07487200  | 4.75088100  | 1.81650000  |
| C  | 2.88427900  | 3.67597100  | 3.01118000  |
| C  | 1.53739900  | 5.99137200  | 2.23956700  |
| H  | 0.18949800  | 4.67395500  | 1.19316100  |
| C  | 3.34352100  | 4.92061700  | 3.42581900  |
| H  | 3.39623200  | 2.76852600  | 3.31611200  |
| C  | 2.67435000  | 6.08211900  | 3.04173400  |
| H  | 1.00925900  | 6.89149800  | 1.94140800  |
| H  | 4.22511500  | 4.98441100  | 4.05563700  |
| H  | 3.03470700  | 7.05193200  | 3.36858000  |
| C  | -1.62870100 | 1.82293300  | -3.32440400 |
| C  | -0.61538400 | 1.23643200  | -2.56842300 |
| C  | -0.42213600 | -0.13806900 | -2.54670600 |
| C  | -1.27507800 | -0.91113500 | -3.32476700 |
| C  | -2.23854100 | -0.34808100 | -4.15942300 |
| C  | -2.42667600 | 1.03474600  | -4.14879400 |
| C  | -1.70196400 | 3.30507300  | -3.04730800 |
| C  | -0.34474900 | 3.62367000  | -2.40866000 |
| C  | 0.10175200  | 2.28571900  | -1.75324400 |
| H  | 0.33955000  | -0.60647300 | -1.93236300 |
| H  | -2.85313700 | -0.98346500 | -4.78766600 |
| H  | -3.19453400 | 1.47949000  | -4.77407100 |
| H  | -1.85686800 | 3.92058800  | -3.93612300 |
| H  | -0.38746600 | 4.43740800  | -1.67452100 |
| H  | -0.22867100 | 2.22341900  | -0.70719100 |
| H  | -2.51072300 | 3.51438400  | -2.33955200 |
| Br | -1.18122300 | -2.79847000 | -3.13447300 |
| O  | 0.52850300  | 3.98647900  | -3.46922400 |
| C  | 1.82535000  | 4.30406500  | -3.01190900 |
| H  | 2.42631900  | 4.60360800  | -3.87055800 |

|   |            |             |             |
|---|------------|-------------|-------------|
| H | 1.79768600 | 5.13015500  | -2.28750900 |
| N | 1.56233400 | 2.16422300  | -1.79950900 |
| C | 2.31355900 | 1.14636300  | -1.33285000 |
| C | 2.40338300 | 3.08044600  | -2.37632200 |
| N | 3.64390100 | 2.69521900  | -2.29307600 |
| N | 3.55696900 | 1.49249700  | -1.64097300 |
| C | 4.72391700 | 0.70665600  | -1.34844300 |
| C | 5.14812600 | -0.22321400 | -2.29572500 |
| C | 5.34105500 | 0.87925400  | -0.10695100 |
| C | 6.25290900 | -1.00955100 | -1.96728600 |
| C | 6.44133600 | 0.07585100  | 0.17128000  |
| C | 6.90190600 | -0.87690300 | -0.74034200 |
| H | 6.60317700 | -1.74975700 | -2.68227500 |
| H | 6.93320900 | 0.17334900  | 1.13591400  |
| C | 8.05054600 | -1.77518700 | -0.36592800 |
| H | 8.90382400 | -1.19691100 | -0.00124300 |
| H | 7.74496200 | -2.45118700 | 0.44030200  |
| H | 8.37924100 | -2.38080400 | -1.21280900 |
| C | 4.79842800 | 1.86786400  | 0.88646600  |
| H | 4.69541700 | 2.86596600  | 0.44846900  |
| H | 3.80544200 | 1.55020100  | 1.22363700  |
| H | 5.45211200 | 1.93512300  | 1.75837800  |
| C | 4.41158000 | -0.38763800 | -3.59861300 |
| H | 3.40052600 | -0.77360700 | -3.42616700 |
| H | 4.31011300 | 0.56780200  | -4.12135000 |
| H | 4.93521300 | -1.08718100 | -4.25167700 |

TS3<sup>H</sup>

|   |            |             |             |
|---|------------|-------------|-------------|
| C | 4.96548500 | -0.32005600 | 0.69816100  |
| C | 3.57452300 | -0.42612300 | 0.66328700  |
| C | 2.75133900 | 0.68226700  | 0.79553800  |
| C | 3.37124100 | 1.91656100  | 0.96916100  |
| C | 4.75520800 | 2.05013000  | 1.02484400  |
| C | 5.56171400 | 0.91946200  | 0.88851600  |
| C | 5.60211400 | -1.67263200 | 0.47105400  |
| C | 4.47600600 | -2.46075500 | -0.20595400 |
| C | 3.19606200 | -1.87833800 | 0.44349200  |
| H | 1.66824200 | 0.61918400  | 0.75930700  |
| H | 5.19775200 | 3.03023400  | 1.15944300  |
| H | 6.64196000 | 1.02018700  | 0.91157500  |
| H | 6.48637400 | -1.64094100 | -0.16853700 |
| H | 4.54819900 | -3.54823200 | -0.08888600 |
| H | 2.94502800 | -2.38706300 | 1.37916400  |
| H | 5.87773900 | -2.14664600 | 1.41900400  |

|    |             |             |             |
|----|-------------|-------------|-------------|
| Br | 2.27706500  | 3.45727900  | 1.12432200  |
| O  | 4.51769200  | -2.10460900 | -1.58250100 |
| C  | 3.49939700  | -2.69482400 | -2.35862000 |
| H  | 3.59880500  | -2.33033400 | -3.38089100 |
| H  | 3.58196600  | -3.79044000 | -2.35980900 |
| N  | 2.05959100  | -2.04277600 | -0.46286100 |
| C  | 0.76565300  | -1.77049400 | -0.20418700 |
| C  | 2.16663900  | -2.30586300 | -1.79689100 |
| N  | 1.00705500  | -2.21228700 | -2.38307400 |
| N  | 0.14263300  | -1.88180500 | -1.38172200 |
| C  | -1.25633400 | -1.70178700 | -1.66474200 |
| C  | -2.19680200 | -2.52885000 | -1.04927100 |
| C  | -1.59857800 | -0.66466300 | -2.54391600 |
| C  | -3.54114000 | -2.28731400 | -1.35086300 |
| C  | -2.94903400 | -0.47808600 | -2.81261500 |
| C  | -3.93447600 | -1.27421800 | -2.22078600 |
| H  | -4.29636700 | -2.90999100 | -0.87745900 |
| H  | -3.24167500 | 0.33107900  | -3.47727400 |
| C  | -5.38888100 | -1.02956100 | -2.52604200 |
| H  | -5.63253300 | -1.35612600 | -3.54170900 |
| H  | -6.03604900 | -1.56927100 | -1.83214300 |
| H  | -5.62468900 | 0.03643400  | -2.46085200 |
| C  | -0.55702500 | 0.24471800  | -3.13877800 |
| H  | 0.14591200  | 0.58164600  | -2.36873200 |
| H  | 0.01799300  | -0.26196500 | -3.91833800 |
| H  | -1.03460300 | 1.12803500  | -3.56747700 |
| C  | -1.83862500 | -3.60974900 | -0.06398200 |
| H  | -1.88797300 | -3.22286600 | 0.96102400  |
| H  | -2.54618200 | -4.43693300 | -0.14671000 |
| H  | -0.83045800 | -4.00222600 | -0.21676400 |
| C  | -1.21260300 | -0.87186900 | 2.87014800  |
| C  | -0.70344500 | -0.62524200 | 1.50029700  |
| H  | -0.55090800 | -0.48823300 | 3.65293900  |
| C  | 0.20663800  | -1.57040300 | 1.12419000  |
| H  | -0.32290600 | -2.23725100 | 2.70938600  |
| O  | 0.49929400  | -2.52525600 | 2.02120200  |
| C  | -2.62892400 | -0.65250000 | 3.12611700  |
| C  | -3.10715000 | -0.35143900 | 4.41962100  |
| C  | -3.60362100 | -0.78273100 | 2.11050300  |
| C  | -4.46275200 | -0.19428600 | 4.68088900  |
| H  | -2.38787300 | -0.23943100 | 5.22788700  |
| C  | -4.95758200 | -0.61277300 | 2.37221000  |
| H  | -3.28373200 | -1.02455500 | 1.09936900  |
| C  | -5.40655000 | -0.31880600 | 3.66011800  |

|     |             |             |             |
|-----|-------------|-------------|-------------|
| H   | -4.78692300 | 0.03704800  | 5.69226300  |
| H   | -5.67172800 | -0.71824100 | 1.55866600  |
| H   | -6.46453500 | -0.19093400 | 3.86423300  |
| C   | -1.07361600 | 0.44961900  | 0.64176300  |
| C   | -1.36405800 | 1.39975200  | -0.05842400 |
| C   | -1.74164400 | 2.45580400  | -0.94936400 |
| C   | -0.79222700 | 3.38504700  | -1.40020000 |
| C   | -3.06330200 | 2.53807600  | -1.41390500 |
| C   | -1.15912500 | 4.36672300  | -2.31381700 |
| H   | 0.22220700  | 3.33191800  | -1.01713300 |
| C   | -3.42153600 | 3.52345900  | -2.32698000 |
| H   | -3.79161900 | 1.81650300  | -1.05680900 |
| C   | -2.47026700 | 4.43516800  | -2.78357100 |
| H   | -0.41959400 | 5.08118700  | -2.66043500 |
| H   | -4.44474100 | 3.57902500  | -2.68452300 |
| H   | -2.75153900 | 5.20089700  | -3.49906200 |
| M3' |             |             |             |
| C   | 4.92412800  | -0.62227200 | 0.65480800  |
| C   | 3.52920900  | -0.60542200 | 0.66742400  |
| C   | 2.80976300  | 0.57413700  | 0.77956400  |
| C   | 3.54010500  | 1.75451000  | 0.87922000  |
| C   | 4.93165600  | 1.76897900  | 0.88346500  |
| C   | 5.63216700  | 0.56693100  | 0.77155800  |
| C   | 5.42977400  | -2.03610400 | 0.47656000  |
| C   | 4.21348500  | -2.75432200 | -0.11737600 |
| C   | 3.01127200  | -2.02183800 | 0.52794800  |
| H   | 1.72482400  | 0.60362800  | 0.77805900  |
| H   | 5.46148000  | 2.71132200  | 0.96089700  |
| H   | 6.71732800  | 0.57361200  | 0.75700600  |
| H   | 6.28782100  | -2.11699500 | -0.19386400 |
| H   | 4.19297700  | -3.83530700 | 0.06423600  |
| H   | 2.72782600  | -2.45763600 | 1.49132900  |
| H   | 5.69993100  | -2.48484700 | 1.43831900  |
| Br  | 2.58637200  | 3.38912100  | 1.00055200  |
| O   | 4.23761600  | -2.48806800 | -1.51472500 |
| C   | 3.15668600  | -3.05660300 | -2.21801600 |
| H   | 3.24193100  | -2.76125600 | -3.26388800 |
| H   | 3.17280100  | -4.15355600 | -2.15509600 |
| N   | 1.84035500  | -2.13082900 | -0.34002800 |
| C   | 0.57285400  | -1.78655800 | -0.04889900 |
| C   | 1.87038400  | -2.55204600 | -1.63864000 |
| N   | 0.68610500  | -2.49050400 | -2.17419700 |
| N   | -0.11065800 | -2.01170500 | -1.17100600 |

|   |             |             |             |
|---|-------------|-------------|-------------|
| C | -1.50873900 | -1.77526900 | -1.41327300 |
| C | -2.45206500 | -2.58746300 | -0.78411800 |
| C | -1.84404900 | -0.73719600 | -2.29178200 |
| C | -3.79800700 | -2.30099100 | -1.02944000 |
| C | -3.19859800 | -0.48971400 | -2.49175100 |
| C | -4.18685900 | -1.25173600 | -1.86019600 |
| H | -4.55661800 | -2.91044700 | -0.54488500 |
| H | -3.48840700 | 0.32359100  | -3.15304100 |
| C | -5.64255900 | -0.93306200 | -2.08291900 |
| H | -5.87546100 | 0.07306700  | -1.72007100 |
| H | -5.89128800 | -0.96040200 | -3.14750600 |
| H | -6.28873200 | -1.64187800 | -1.56109700 |
| C | -0.78751700 | 0.05484100  | -3.01376800 |
| H | 0.02769100  | 0.33349900  | -2.33916800 |
| H | -0.35956100 | -0.53403200 | -3.83054800 |
| H | -1.21570300 | 0.97094200  | -3.42539600 |
| C | -2.05387400 | -3.71555400 | 0.12995700  |
| H | -1.22058700 | -4.28891700 | -0.28699100 |
| H | -1.73332900 | -3.34585700 | 1.10905200  |
| H | -2.89720100 | -4.39192800 | 0.27723300  |
| C | -1.24405900 | -0.20774600 | 3.00179800  |
| C | -0.61215600 | -0.38782500 | 1.64505100  |
| H | -0.83934000 | 0.68232000  | 3.50068400  |
| C | 0.08092000  | -1.54945200 | 1.37188700  |
| O | 0.36936300  | -2.52260600 | 2.12158300  |
| C | -2.76098000 | -0.09641500 | 2.98528000  |
| C | -3.43881000 | 0.27773400  | 4.15045500  |
| C | -3.51241500 | -0.37610700 | 1.84235700  |
| C | -4.82775200 | 0.36103500  | 4.17656700  |
| H | -2.86693100 | 0.50528900  | 5.04722700  |
| C | -4.90411600 | -0.29536200 | 1.86405800  |
| H | -3.00499200 | -0.65476700 | 0.92473400  |
| C | -5.56862600 | 0.07298500  | 3.03034600  |
| H | -5.33367200 | 0.65279500  | 5.09192000  |
| H | -5.46486100 | -0.52328900 | 0.96092200  |
| H | -6.65188000 | 0.13879000  | 3.04855300  |
| C | -0.75001000 | 0.64372200  | 0.68524400  |
| C | -0.88181100 | 1.58643300  | -0.07653800 |
| C | -1.20061600 | 2.58419800  | -1.05420700 |
| C | -0.19591100 | 3.33212000  | -1.68583600 |
| C | -2.53953100 | 2.77644200  | -1.43312900 |
| C | -0.52461200 | 4.23672500  | -2.68967900 |
| H | 0.83478500  | 3.19894600  | -1.37289600 |
| C | -2.86110500 | 3.68710600  | -2.43323200 |

|   |             |             |             |
|---|-------------|-------------|-------------|
| H | -3.31117100 | 2.19091600  | -0.94221400 |
| C | -1.85457600 | 4.41396000  | -3.06909700 |
| H | 0.25961600  | 4.80676700  | -3.17744200 |
| H | -3.89821200 | 3.82652000  | -2.72159100 |
| H | -2.10665500 | 5.11956400  | -3.85401700 |
| H | -0.95215200 | -1.06982100 | 3.61206800  |

TS4'-RS

|    |             |             |             |
|----|-------------|-------------|-------------|
| C  | -5.02040600 | -0.23526100 | 0.22904900  |
| C  | -3.64402200 | -0.37544900 | 0.04404000  |
| C  | -2.79909700 | 0.72483500  | 0.01158800  |
| C  | -3.37009700 | 1.97588100  | 0.22676700  |
| C  | -4.74155300 | 2.14521700  | 0.38656600  |
| C  | -5.57829700 | 1.02799100  | 0.37302600  |
| C  | -5.67681300 | -1.59534000 | 0.29795700  |
| C  | -4.51114300 | -2.50566300 | 0.70156800  |
| C  | -3.29749800 | -1.85251500 | -0.00614700 |
| H  | -1.72830300 | 0.64821500  | -0.15299900 |
| H  | -5.14840500 | 3.13683500  | 0.54731400  |
| H  | -6.64653000 | 1.15182700  | 0.51898400  |
| H  | -6.48416400 | -1.65917500 | 1.03017200  |
| H  | -4.63825700 | -3.55539100 | 0.41121600  |
| H  | -3.19770900 | -2.22623100 | -1.02309500 |
| H  | -6.07045300 | -1.89751500 | -0.67836900 |
| Br | -2.22507400 | 3.47801500  | 0.39034000  |
| O  | -4.39367200 | -2.39946700 | 2.11260200  |
| C  | -3.29340000 | -3.11857200 | 2.62152000  |
| H  | -3.26330200 | -2.98002000 | 3.70196200  |
| H  | -3.38060400 | -4.19073200 | 2.39764800  |
| N  | -2.04641100 | -2.13642200 | 0.71730000  |
| C  | -0.78436200 | -1.73980000 | 0.41898400  |
| C  | -2.04038500 | -2.58171700 | 2.00573600  |
| N  | -0.86528500 | -2.45072200 | 2.54174700  |
| N  | -0.09229200 | -1.89923500 | 1.55779300  |
| C  | 1.18366900  | -1.38209700 | 2.00308500  |
| C  | 2.30343200  | -2.21293500 | 2.05855000  |
| C  | 1.16801000  | -0.08311500 | 2.53248900  |
| C  | 3.48222800  | -1.65086800 | 2.55802700  |
| C  | 2.36218000  | 0.41450600  | 3.04276600  |
| C  | 3.53553300  | -0.34308400 | 3.03559000  |
| H  | 4.37732800  | -2.26845400 | 2.58639100  |
| H  | 2.38460000  | 1.43107800  | 3.42914400  |
| C  | 4.83390600  | 0.24097200  | 3.52583400  |
| H  | 5.35028200  | -0.45041100 | 4.19684900  |

|   |             |             |             |
|---|-------------|-------------|-------------|
| H | 5.50308300  | 0.44221200  | 2.68219600  |
| H | 4.67014600  | 1.18445300  | 4.05053000  |
| C | -0.07329400 | 0.76882900  | 2.51838900  |
| H | -0.25976300 | 1.16142900  | 1.51234000  |
| H | -0.95902400 | 0.20878600  | 2.83429300  |
| H | 0.04782800  | 1.62400000  | 3.18592700  |
| C | 2.26667800  | -3.66886100 | 1.67869200  |
| H | 2.15577700  | -4.27582500 | 2.58369400  |
| H | 1.44535000  | -3.90163600 | 0.99834900  |
| H | 3.20923800  | -3.95539000 | 1.20380600  |
| C | 0.52993600  | -0.15999700 | -2.92629300 |
| C | 0.70519700  | -0.65737600 | -1.47936000 |
| H | 0.28265200  | -1.02574100 | -3.54711900 |
| C | -0.46993000 | -1.36720000 | -1.02565700 |
| O | -1.25633900 | -1.84055200 | -1.84441000 |
| C | -0.54139300 | 0.90133300  | -3.04261300 |
| C | -0.24748200 | 2.23688100  | -2.74146400 |
| C | -1.84594000 | 0.57544700  | -3.42877200 |
| C | -1.23541100 | 3.21457200  | -2.80371300 |
| H | 0.76484900  | 2.50531600  | -2.45210600 |
| C | -2.83724800 | 1.55304600  | -3.48413300 |
| H | -2.07938800 | -0.45584800 | -3.67029800 |
| C | -2.53769400 | 2.87472800  | -3.16479800 |
| H | -0.99155700 | 4.24310000  | -2.55607000 |
| H | -3.84709400 | 1.27929000  | -3.77527300 |
| H | -3.31108400 | 3.63600900  | -3.19805100 |
| C | 1.33022500  | 0.32988400  | -0.64796900 |
| C | 1.92073700  | 1.25931100  | -0.13751500 |
| C | 2.54759300  | 2.33796400  | 0.56452200  |
| C | 1.77183300  | 3.39806900  | 1.05502700  |
| C | 3.92679900  | 2.31452100  | 0.81708700  |
| C | 2.36694800  | 4.40336500  | 1.81037300  |
| H | 0.70712300  | 3.41483000  | 0.84178700  |
| C | 4.51455400  | 3.32408800  | 1.56917000  |
| H | 4.51706400  | 1.48969300  | 0.42908800  |
| C | 3.73535300  | 4.36575400  | 2.07408400  |
| H | 1.76152000  | 5.21779500  | 2.19463900  |
| H | 5.58102800  | 3.29579300  | 1.76899700  |
| H | 4.19543900  | 5.14926000  | 2.66717400  |
| H | 1.49166600  | 0.24414500  | -3.25299900 |
| C | 1.92606300  | -2.20742200 | -1.64098700 |
| C | 1.29303400  | -3.23647300 | -2.39248700 |
| H | 1.95765800  | -2.40651500 | -0.57159300 |
| H | 1.46632500  | -3.35009700 | -3.45633700 |

|   |             |             |             |
|---|-------------|-------------|-------------|
| C | 0.37592800  | -4.08872600 | -1.75866100 |
| H | -0.09000300 | -4.86277700 | -2.40010300 |
| O | 0.04977000  | -4.03890400 | -0.54665900 |
| C | 3.18852200  | -1.58053600 | -2.12529200 |
| C | 4.11873800  | -1.10871500 | -1.19062800 |
| C | 3.49255900  | -1.46015100 | -3.48719200 |
| C | 5.32305000  | -0.54448000 | -1.60283300 |
| H | 3.88785100  | -1.18861700 | -0.13079000 |
| C | 4.69105400  | -0.88653400 | -3.90065300 |
| H | 2.78457200  | -1.81326900 | -4.23086200 |
| C | 5.61267700  | -0.42887200 | -2.96030100 |
| H | 6.03817100  | -0.19902200 | -0.86183100 |
| H | 4.90786200  | -0.80064200 | -4.96064500 |
| H | 6.54983800  | 0.01213200  | -3.28408900 |

TS4'-RR

|    |             |             |             |
|----|-------------|-------------|-------------|
| C  | -2.52905400 | -3.53701600 | -1.00002800 |
| C  | -1.66360900 | -2.52452100 | -0.57480600 |
| C  | -2.07900600 | -1.53872800 | 0.30398800  |
| C  | -3.40364200 | -1.58110900 | 0.73402300  |
| C  | -4.28955000 | -2.56477500 | 0.30837100  |
| C  | -3.84657400 | -3.55673500 | -0.56728400 |
| C  | -1.79105400 | -4.53010500 | -1.86982600 |
| C  | -0.34291000 | -4.27777900 | -1.44964800 |
| C  | -0.31527700 | -2.74565700 | -1.24277000 |
| H  | -1.41277000 | -0.75516600 | 0.64052300  |
| H  | -5.31255100 | -2.56066800 | 0.66702400  |
| H  | -4.52408600 | -4.34370000 | -0.88360000 |
| H  | -2.07734500 | -5.56825100 | -1.69094100 |
| H  | 0.41990200  | -4.62818100 | -2.15475700 |
| H  | -0.24681000 | -2.22655100 | -2.20434000 |
| H  | -1.91798200 | -4.31080800 | -2.93602400 |
| Br | -4.01715300 | -0.24457000 | 1.92957900  |
| O  | -0.20404000 | -4.90869100 | -0.18172000 |
| C  | 1.02879700  | -4.70853600 | 0.46191400  |
| H  | 0.91075200  | -5.00832500 | 1.50427900  |
| H  | 1.81991700  | -5.32207800 | 0.00902400  |
| N  | 0.88666100  | -2.39206300 | -0.47870800 |
| C  | 1.67968700  | -1.28848600 | -0.54612500 |
| C  | 1.47912000  | -3.27894000 | 0.37197600  |
| N  | 2.55814700  | -2.77362900 | 0.88588600  |
| N  | 2.67150900  | -1.53484200 | 0.31286300  |
| C  | 3.87655800  | -0.82232000 | 0.67892100  |
| C  | 5.03112300  | -1.10837700 | -0.05479900 |



|   |             |             |             |
|---|-------------|-------------|-------------|
| C | 3.86234300  | -0.02010900 | 1.81429300  |
| C | 6.21067700  | -0.50525100 | 0.36562000  |
| C | 5.07749600  | 0.54974000  | 2.20573900  |
| C | 6.25216400  | 0.32625900  | 1.49216900  |
| H | 7.12470000  | -0.69416200 | -0.19201900 |
| H | 5.09713900  | 1.18253900  | 3.08905100  |
| C | 7.54919100  | 0.96936800  | 1.90919200  |
| H | 7.46342900  | 1.43312800  | 2.89367100  |
| H | 8.35824900  | 0.23488300  | 1.94182400  |
| H | 7.84113900  | 1.74466300  | 1.19415000  |
| C | 2.59276500  | 0.23587600  | 2.57567600  |
| H | 1.92745700  | 0.88259800  | 1.99421900  |
| H | 2.06090700  | -0.69964700 | 2.77511700  |
| H | 2.80399400  | 0.72211800  | 3.52933000  |
| C | 4.96999300  | -2.02009300 | -1.24776900 |
| H | 4.23019200  | -1.64169900 | -1.95903100 |
| H | 5.94126200  | -2.07144500 | -1.74210000 |
| H | 4.68258700  | -3.03382800 | -0.94897800 |
| C | -0.50475800 | 0.95480100  | -2.65249600 |
| C | 0.54618100  | 0.85442000  | -1.51358400 |
| H | -0.23631500 | 0.19733600  | -3.39282500 |
| C | 1.40833400  | -0.31783300 | -1.72956000 |
| O | 1.59946400  | -0.87462000 | -2.80832300 |
| C | -1.94997000 | 0.77567800  | -2.25470000 |
| C | -2.59105400 | 1.70622900  | -1.42752100 |
| C | -2.69061200 | -0.30127800 | -2.74661300 |
| C | -3.92412300 | 1.53631200  | -1.06946500 |
| H | -2.03207500 | 2.56524700  | -1.06260600 |
| C | -4.03218500 | -0.46444100 | -2.40536100 |
| H | -2.21049400 | -1.02204800 | -3.40595100 |
| C | -4.64873300 | 0.44827000  | -1.55543200 |
| H | -4.39911100 | 2.25265600  | -0.40575500 |
| H | -4.58747200 | -1.31514100 | -2.78863300 |
| H | -5.68602400 | 0.31117100  | -1.26487200 |
| C | 0.09816000  | 1.03025200  | -0.16980300 |
| C | -0.32341500 | 1.27380200  | 0.94412600  |
| C | -0.98541000 | 1.51588700  | 2.18948700  |
| C | -0.83418800 | 0.64192500  | 3.27579100  |
| C | -1.86956500 | 2.60103000  | 2.29450300  |
| C | -1.55946800 | 0.84898700  | 4.44321000  |
| H | -0.16685600 | -0.20886500 | 3.18517200  |
| C | -2.59922100 | 2.79330400  | 3.46095300  |
| H | -1.98525100 | 3.26994600  | 1.44659000  |
| C | -2.44733400 | 1.91887100  | 4.53752100  |

|   |             |            |             |
|---|-------------|------------|-------------|
| H | -1.44220200 | 0.16442600 | 5.27694700  |
| H | -3.28987500 | 3.62747500 | 3.53168500  |
| H | -3.01959000 | 2.07189100 | 5.44660300  |
| H | -0.41258000 | 1.91765500 | -3.15866600 |
| C | 1.60333700  | 2.58038700 | -1.79180400 |
| C | 2.70131700  | 2.66644000 | -0.89877800 |
| H | 1.83953500  | 2.22321900 | -2.79601300 |
| H | 2.75550000  | 3.43832100 | -0.14022100 |
| C | 3.64963600  | 1.65339400 | -0.95937700 |
| H | 4.52622300  | 1.69743400 | -0.28923200 |
| O | 3.50375500  | 0.65013900 | -1.71155100 |
| C | 0.59168900  | 3.66875600 | -1.73100500 |
| C | 0.05140300  | 4.21715300 | -2.90146400 |
| C | 0.16971900  | 4.19157400 | -0.49861300 |
| C | -0.89860000 | 5.23436900 | -2.84832500 |
| H | 0.39095000  | 3.84837400 | -3.86595900 |
| C | -0.77992300 | 5.20715600 | -0.44333300 |
| H | 0.58070700  | 3.78428000 | 0.41926000  |
| C | -1.32356200 | 5.72760300 | -1.61778600 |
| H | -1.30297400 | 5.64203100 | -3.76911000 |
| H | -1.09474900 | 5.59600900 | 0.52055600  |
| H | -2.06606500 | 6.51768500 | -1.57255900 |

TS4'-SS

|    |            |             |             |
|----|------------|-------------|-------------|
| C  | 5.08063300 | -0.22522200 | -0.37113700 |
| C  | 3.70817400 | 0.00925500  | -0.41190200 |
| C  | 2.79210400 | -0.91321700 | 0.06290600  |
| C  | 3.29656900 | -2.09926600 | 0.58535100  |
| C  | 4.66253800 | -2.36631900 | 0.63407300  |
| C  | 5.56496500 | -1.41893200 | 0.15021600  |
| C  | 5.82660300 | 0.95895000  | -0.94388700 |
| C  | 4.78910400 | 2.08266300  | -0.84739900 |
| C  | 3.45230800 | 1.34232100  | -1.07402200 |
| H  | 1.72231200 | -0.73185600 | 0.04882000  |
| H  | 5.01482200 | -3.30271000 | 1.05081800  |
| H  | 6.63120300 | -1.61670600 | 0.19444200  |
| H  | 6.73135900 | 1.22353900  | -0.39260300 |
| H  | 4.94495300 | 2.90396100  | -1.55722100 |
| H  | 3.23033300 | 1.18282700  | -2.13347900 |
| H  | 6.09651500 | 0.78532500  | -1.99093200 |
| Br | 2.07068300 | -3.38620200 | 1.24883700  |
| O  | 4.85621800 | 2.56690600  | 0.48934700  |
| C  | 3.91821600 | 3.57877400  | 0.75228200  |
| H  | 3.98316400 | 3.84045200  | 1.80883400  |

|   |             |             |             |
|---|-------------|-------------|-------------|
| H | 4.11915800  | 4.47711500  | 0.15158400  |
| N | 2.33711800  | 2.09390700  | -0.48170100 |
| C | 1.00402500  | 1.93096100  | -0.61088500 |
| C | 2.53681600  | 3.09167100  | 0.43498200  |
| N | 1.40686300  | 3.55452300  | 0.87983100  |
| N | 0.46478400  | 2.82707500  | 0.22322900  |
| C | -0.92444200 | 3.06959700  | 0.52135800  |
| C | -1.72950200 | 3.72302500  | -0.41635400 |
| C | -1.36619400 | 2.72396000  | 1.80616800  |
| C | -3.06426200 | 3.93426500  | -0.06268000 |
| C | -2.70019800 | 2.98238400  | 2.11186800  |
| C | -3.56817100 | 3.56196400  | 1.18250400  |
| H | -3.71826200 | 4.42708500  | -0.77772700 |
| H | -3.07169700 | 2.71287600  | 3.09732000  |
| C | -5.02550400 | 3.75489700  | 1.50393800  |
| H | -5.60612100 | 2.91724800  | 1.10222100  |
| H | -5.19358900 | 3.79417500  | 2.58206900  |
| H | -5.41273700 | 4.67202100  | 1.05445200  |
| C | -0.43635800 | 2.14372200  | 2.83731500  |
| H | 0.29882900  | 1.47288200  | 2.38719500  |
| H | 0.10909900  | 2.94328200  | 3.34800900  |
| H | -0.99968800 | 1.57692100  | 3.58109500  |
| C | -1.20721800 | 4.25199700  | -1.72853800 |
| H | -0.12108500 | 4.36015400  | -1.72476800 |
| H | -1.46381900 | 3.59426400  | -2.56277600 |
| H | -1.64958400 | 5.23121100  | -1.92243700 |
| C | -2.15138300 | 0.46420900  | -2.04651700 |
| C | -0.76894100 | 0.15149900  | -1.39612800 |
| H | -2.13843400 | 0.06560400  | -3.06659100 |
| C | 0.16677800  | 1.24109100  | -1.70859700 |
| O | 0.22427000  | 1.79147500  | -2.79457200 |
| C | -3.39909300 | 0.00772800  | -1.32311300 |
| C | -3.65329200 | 0.41413800  | -0.00891500 |
| C | -4.38510700 | -0.72464900 | -1.98715500 |
| C | -4.83868800 | 0.06895000  | 0.63413100  |
| H | -2.91381200 | 1.00661900  | 0.51567400  |
| C | -5.57474100 | -1.07341900 | -1.34946500 |
| H | -4.22069000 | -1.02753200 | -3.01609100 |
| C | -5.80443400 | -0.68406600 | -0.03307200 |
| H | -5.00542400 | 0.39467400  | 1.65791300  |
| H | -6.32196400 | -1.64994500 | -1.88599400 |
| H | -6.72861800 | -0.95733700 | 0.46613600  |
| C | -0.75767800 | -0.23823800 | -0.01060100 |
| C | -0.72870800 | -0.66569000 | 1.12571500  |

|   |             |             |             |
|---|-------------|-------------|-------------|
| C | -0.82379900 | -1.15873800 | 2.46587000  |
| C | 0.30703400  | -1.25139400 | 3.29065100  |
| C | -2.08012900 | -1.53243100 | 2.96714300  |
| C | 0.17799800  | -1.70618300 | 4.59724500  |
| H | 1.27872400  | -0.97141100 | 2.89536100  |
| C | -2.19823100 | -1.98895000 | 4.27520300  |
| H | -2.94827500 | -1.45723900 | 2.31898900  |
| C | -1.07244100 | -2.07457400 | 5.09313400  |
| H | 1.05619200  | -1.77505300 | 5.23080500  |
| H | -3.17192900 | -2.27740600 | 4.65756600  |
| H | -1.16815900 | -2.42942000 | 6.11401100  |
| H | -2.21940600 | 1.55272300  | -2.15488500 |
| C | -0.12673100 | -1.35126500 | -2.35899900 |
| C | 0.22661900  | -0.97707900 | -3.69541200 |
| H | 0.75629700  | -1.54458200 | -1.74856800 |
| H | -0.47228200 | -1.03495200 | -4.52084400 |
| C | 1.50127000  | -0.45883800 | -3.91305500 |
| H | 1.74852700  | -0.17263000 | -4.95525000 |
| O | 2.37682200  | -0.31352800 | -3.02009500 |
| C | -1.16982900 | -2.41074900 | -2.15704200 |
| C | -1.16793300 | -3.17206300 | -0.98024500 |
| C | -2.12302300 | -2.71560700 | -3.13503800 |
| C | -2.11469600 | -4.16926000 | -0.76853700 |
| H | -0.39629400 | -2.99294500 | -0.23926200 |
| C | -3.06603700 | -3.71913500 | -2.93047200 |
| H | -2.13218700 | -2.16891000 | -4.07274100 |
| C | -3.07474000 | -4.44211600 | -1.74077200 |
| H | -2.09346200 | -4.74226200 | 0.15338000  |
| H | -3.79740500 | -3.93369900 | -3.70392700 |
| H | -3.81179900 | -5.22237800 | -1.57954900 |

TS4'-SR

|   |             |             |             |
|---|-------------|-------------|-------------|
| C | -4.40098100 | -2.87492300 | -0.45771300 |
| C | -3.37559100 | -1.95096900 | -0.25546600 |
| C | -3.46912400 | -0.64905900 | -0.71783100 |
| C | -4.60192500 | -0.31350700 | -1.45096900 |
| C | -5.62455700 | -1.22464400 | -1.70068400 |
| C | -5.52747600 | -2.51845900 | -1.18794700 |
| C | -4.07828100 | -4.17129500 | 0.25414700  |
| C | -3.05789100 | -3.69991000 | 1.29470500  |
| C | -2.25983900 | -2.63024400 | 0.51745000  |
| H | -2.67523100 | 0.06764400  | -0.54051100 |
| H | -6.48981200 | -0.92250300 | -2.27915500 |
| H | -6.33265800 | -3.22727600 | -1.35292300 |

|    |             |             |             |
|----|-------------|-------------|-------------|
| H  | -4.94216600 | -4.63276300 | 0.73664600  |
| H  | -2.42591700 | -4.48876000 | 1.71938300  |
| H  | -1.52431200 | -3.06973600 | -0.15834700 |
| H  | -3.62210800 | -4.90318800 | -0.42105500 |
| Br | -4.73002800 | 1.44195700  | -2.17285700 |
| O  | -3.83175600 | -3.06419300 | 2.30794300  |
| C  | -3.08441700 | -2.42084000 | 3.30638100  |
| H  | -3.76832700 | -1.80904000 | 3.89606200  |
| H  | -2.60149100 | -3.14835100 | 3.97463200  |
| N  | -1.53374500 | -1.76600500 | 1.45332200  |
| C  | -0.40730400 | -1.02376900 | 1.30628800  |
| C  | -1.99484600 | -1.56847300 | 2.72438800  |
| N  | -1.25232600 | -0.71784400 | 3.36831400  |
| N  | -0.27419400 | -0.39218700 | 2.47819500  |
| C  | 0.74322400  | 0.52654300  | 2.91476500  |
| C  | 1.96896000  | 0.02057000  | 3.34429000  |
| C  | 0.39548000  | 1.87987100  | 2.98326000  |
| C  | 2.91502900  | 0.94943900  | 3.78603300  |
| C  | 1.37765000  | 2.76310900  | 3.41952500  |
| C  | 2.64509500  | 2.31718400  | 3.80907200  |
| H  | 3.88429800  | 0.58859000  | 4.12028700  |
| H  | 1.14402200  | 3.82386300  | 3.46892500  |
| C  | 3.69748600  | 3.30333000  | 4.24333000  |
| H  | 4.47788300  | 2.81656300  | 4.83141800  |
| H  | 4.17304300  | 3.76253400  | 3.37086300  |
| H  | 3.26129700  | 4.10745400  | 4.84063400  |
| C  | -1.00035100 | 2.33966100  | 2.66115000  |
| H  | -1.39129300 | 1.83946900  | 1.77092700  |
| H  | -1.67180900 | 2.11132600  | 3.49513800  |
| H  | -1.02046300 | 3.41595000  | 2.48152300  |
| C  | 2.27000300  | -1.45571100 | 3.33122200  |
| H  | 1.39789700  | -2.04358000 | 3.63091400  |
| H  | 2.57098400  | -1.79908900 | 2.33485100  |
| H  | 3.08718100  | -1.67690100 | 4.01950700  |
| C  | 3.05614700  | -0.06060400 | 0.14552900  |
| C  | 1.56688200  | -0.23310200 | -0.23373600 |
| H  | 3.10693300  | 0.13811400  | 1.22264600  |
| C  | 0.76671100  | -1.31779900 | 0.33863800  |
| O  | 1.01406700  | -2.51998300 | 0.31530600  |
| C  | 4.14566500  | -1.06377100 | -0.18929000 |
| C  | 5.41510900  | -0.53677500 | -0.45987600 |
| C  | 3.99551700  | -2.45296600 | -0.19069700 |
| C  | 6.49699900  | -1.36218900 | -0.74121700 |
| H  | 5.54690900  | 0.54246600  | -0.47833800 |

|   |             |             |             |
|---|-------------|-------------|-------------|
| C | 5.07919900  | -3.28300400 | -0.47993800 |
| H | 3.02264800  | -2.88573000 | 0.00654300  |
| C | 6.33201200  | -2.74605200 | -0.75880000 |
| H | 7.46576700  | -0.92413000 | -0.96227100 |
| H | 4.93670600  | -4.35971600 | -0.48887500 |
| H | 7.17082000  | -3.39623100 | -0.98693200 |
| C | 0.88319500  | 1.02072500  | -0.20964600 |
| C | 0.28864200  | 2.07170700  | -0.35065900 |
| C | -0.45202900 | 3.29304000  | -0.43237900 |
| C | -1.76344500 | 3.26977800  | -0.92891300 |
| C | 0.08922200  | 4.50560000  | 0.02019100  |
| C | -2.52584800 | 4.42998200  | -0.95644200 |
| H | -2.17542500 | 2.33363000  | -1.29030900 |
| C | -0.67645900 | 5.66635500  | -0.02019500 |
| H | 1.10170000  | 4.52136900  | 0.41121200  |
| C | -1.98491600 | 5.63268800  | -0.50258700 |
| H | -3.54430300 | 4.38808200  | -1.33118400 |
| H | -0.25261600 | 6.60129400  | 0.33199900  |
| H | -2.57899000 | 6.54030800  | -0.52481600 |
| H | 3.35175900  | 0.88264600  | -0.32203100 |
| C | 1.59912900  | -0.71622000 | -2.27836000 |
| C | 0.46568500  | -0.09874300 | -2.85295000 |
| H | 1.49256100  | -1.76530900 | -1.99426100 |
| H | 0.56365000  | 0.72717000  | -3.54827600 |
| C | -0.76877600 | -0.44098500 | -2.31151100 |
| H | -1.68344400 | 0.07698400  | -2.66573300 |
| O | -0.87025300 | -1.28932400 | -1.38521700 |
| C | 2.92137000  | -0.33903800 | -2.83796200 |
| C | 3.80196600  | -1.32131800 | -3.30427500 |
| C | 3.28886300  | 1.00646900  | -2.95482300 |
| C | 5.02030400  | -0.96970100 | -3.87390200 |
| H | 3.52897900  | -2.36802600 | -3.20316100 |
| C | 4.51801200  | 1.35980000  | -3.50514400 |
| H | 2.60643400  | 1.77085900  | -2.58949000 |
| C | 5.38589500  | 0.37246300  | -3.96856700 |
| H | 5.69282900  | -1.74406500 | -4.22963600 |
| H | 4.79710300  | 2.40662100  | -3.57663100 |
| H | 6.34295700  | 0.64774300  | -4.40056000 |

TS4<sup>H</sup>-RS

|   |             |             |             |
|---|-------------|-------------|-------------|
| C | -2.72618700 | -3.02576200 | -1.73675900 |
| C | -1.82579200 | -2.27156300 | -0.97893500 |
| C | -2.14157300 | -1.81875100 | 0.29031600  |
| C | -3.42127100 | -2.10387200 | 0.76653700  |

|    |             |             |             |
|----|-------------|-------------|-------------|
| C  | -4.34917300 | -2.81990500 | 0.01880600  |
| C  | -3.99430600 | -3.29559200 | -1.24473500 |
| C  | -2.07790900 | -3.47485500 | -3.02652600 |
| C  | -0.59057700 | -3.33945800 | -2.69384200 |
| C  | -0.55478000 | -2.08967300 | -1.78417000 |
| H  | -1.43673000 | -1.25746400 | 0.89894700  |
| H  | -5.33271900 | -3.01884700 | 0.42817500  |
| H  | -4.70239600 | -3.88254500 | -1.82059600 |
| H  | -2.32219700 | -4.50194500 | -3.30412300 |
| H  | 0.07048400  | -3.25041300 | -3.56429300 |
| H  | -0.59728400 | -1.17696200 | -2.38731000 |
| H  | -2.34043100 | -2.81637600 | -3.86145300 |
| Br | -3.91473100 | -1.47579500 | 2.48579300  |
| O  | -0.25488500 | -4.47732900 | -1.91424500 |
| C  | 1.08390300  | -4.49507600 | -1.48550800 |
| H  | 1.18528000  | -5.28762000 | -0.74264900 |
| H  | 1.76638900  | -4.70653100 | -2.32020400 |
| N  | 0.70354700  | -2.05348700 | -1.03301700 |
| C  | 1.41964500  | -0.99760400 | -0.55808000 |
| C  | 1.47959600  | -3.17356600 | -0.89335200 |
| N  | 2.61994900  | -2.88141700 | -0.34613500 |
| N  | 2.57527400  | -1.53529100 | -0.14914900 |
| C  | 3.76622200  | -0.91929800 | 0.38881600  |
| C  | 4.72048900  | -0.45086000 | -0.52394900 |
| C  | 3.98650500  | -0.97185600 | 1.76284000  |
| C  | 5.88875300  | 0.09136300  | 0.00019600  |
| C  | 5.17674600  | -0.41239500 | 2.23588300  |
| C  | 6.12269100  | 0.14106500  | 1.37819600  |
| H  | 6.64358300  | 0.47014900  | -0.68425700 |
| H  | 5.36704600  | -0.42616400 | 3.30646200  |
| C  | 7.37945200  | 0.77416100  | 1.91595900  |
| H  | 7.60962600  | 0.40843400  | 2.91884300  |
| H  | 8.23380500  | 0.56917600  | 1.26619700  |
| H  | 7.26546200  | 1.86126900  | 1.97528600  |
| C  | 3.05242000  | -1.65661800 | 2.72262400  |
| H  | 2.11500500  | -1.95011500 | 2.25084300  |
| H  | 3.53337800  | -2.55204000 | 3.12881000  |
| H  | 2.81199200  | -0.98783300 | 3.55148500  |
| C  | 4.51814400  | -0.59018600 | -2.00807000 |
| H  | 4.32835900  | -1.63604600 | -2.27282300 |
| H  | 3.66256200  | 0.00758300  | -2.32862200 |
| H  | 5.40897200  | -0.26056500 | -2.54529400 |
| C  | -0.43222600 | 2.06541700  | -1.89383900 |
| C  | -0.18342500 | 0.98038600  | -0.84609700 |

|   |             |             |             |
|---|-------------|-------------|-------------|
| H | -1.50012400 | 2.05317400  | -2.13456600 |
| C | 1.14903400  | 0.48775000  | -0.80512700 |
| O | 2.16635000  | 1.11659900  | -1.14362700 |
| C | -0.05599800 | 3.51074300  | -1.60768800 |
| C | 1.03003200  | 3.88733000  | -0.81143000 |
| C | -0.82999700 | 4.52147800  | -2.18855300 |
| C | 1.30346600  | 5.23447100  | -0.57437200 |
| H | 1.66085700  | 3.11824000  | -0.37966200 |
| C | -0.55348200 | 5.86625900  | -1.96425800 |
| H | -1.68449000 | 4.24599000  | -2.80258200 |
| C | 0.51294100  | 6.22972300  | -1.14380600 |
| H | 2.14278800  | 5.50459300  | 0.05944300  |
| H | -1.17890100 | 6.62945200  | -2.41759800 |
| H | 0.72704300  | 7.27677100  | -0.95382300 |
| H | -0.97998800 | 0.24953000  | -0.76728400 |
| H | 0.09677900  | 1.77557400  | -2.81506900 |
| C | -0.81445100 | 1.82849800  | 1.05644700  |
| C | -0.81308100 | 0.83758500  | 2.04529100  |
| H | 0.06668400  | 2.45964100  | 1.00826300  |
| C | 0.42384400  | 0.26788500  | 2.40676400  |
| H | 0.41528300  | -0.52150500 | 3.18738300  |
| O | 1.50131800  | 0.56411700  | 1.85449000  |
| C | -2.09969800 | 2.47150500  | 0.69036100  |
| C | -3.25073700 | 1.70146900  | 0.47554100  |
| C | -2.19899800 | 3.86438900  | 0.60419900  |
| C | -4.46737000 | 2.30594800  | 0.18040600  |
| H | -3.18774400 | 0.61930500  | 0.54158100  |
| C | -3.41917500 | 4.47177700  | 0.31918800  |
| H | -1.31029100 | 4.47262500  | 0.75302200  |
| C | -4.55544300 | 3.69600400  | 0.10261800  |
| H | -5.34739500 | 1.69227800  | 0.01432400  |
| H | -3.47714200 | 5.55399400  | 0.25627700  |
| H | -5.50444500 | 4.17014800  | -0.12674600 |
| H | -1.73660400 | 0.44225500  | 2.45465300  |

TS4<sup>H</sup>-RR

|   |            |             |             |
|---|------------|-------------|-------------|
| C | 3.69104100 | -0.61531100 | 2.22671500  |
| C | 2.70810800 | -0.74280300 | 1.23873600  |
| C | 3.02824000 | -1.05491200 | -0.07252100 |
| C | 4.38060300 | -1.20766100 | -0.37177800 |
| C | 5.38081300 | -1.06192700 | 0.58225400  |
| C | 5.03055000 | -0.76560500 | 1.90074200  |
| C | 3.05727900 | -0.36258300 | 3.57591000  |
| C | 1.63199600 | -0.86506300 | 3.34554300  |



|    |             |             |             |
|----|-------------|-------------|-------------|
| C  | 1.35902100  | -0.45480500 | 1.87944400  |
| H  | 2.26510500  | -1.16626600 | -0.83976200 |
| H  | 6.41975400  | -1.19189700 | 0.30227900  |
| H  | 5.80143700  | -0.67487200 | 2.65928000  |
| H  | 3.53559600  | -0.90580800 | 4.39309500  |
| H  | 0.88208200  | -0.47200500 | 4.04303800  |
| H  | 1.14572800  | 0.61467700  | 1.83869400  |
| H  | 3.04635800  | 0.70424600  | 3.82617400  |
| Br | 4.86222800  | -1.63293000 | -2.15724100 |
| O  | 1.70361300  | -2.28069000 | 3.41413600  |
| C  | 0.48707900  | -2.93432500 | 3.15314600  |
| H  | 0.70258100  | -3.99367600 | 3.00765900  |
| H  | -0.20705600 | -2.83099900 | 3.99898600  |
| N  | 0.17676300  | -1.17237600 | 1.38464200  |
| C  | -0.76649800 | -0.85914600 | 0.45282200  |
| C  | -0.19594700 | -2.37235300 | 1.94033400  |
| N  | -1.28276900 | -2.82871400 | 1.39801000  |
| N  | -1.62389100 | -1.88293400 | 0.47852900  |
| C  | -2.90827300 | -1.98735100 | -0.16944500 |
| C  | -3.98679500 | -1.35235100 | 0.44296300  |
| C  | -3.00309700 | -2.71721600 | -1.35213400 |
| C  | -5.22694900 | -1.46668900 | -0.18506000 |
| C  | -4.26427700 | -2.80798200 | -1.93577800 |
| C  | -5.38248900 | -2.19006900 | -1.36813500 |
| H  | -6.08725000 | -0.97421700 | 0.26166400  |
| H  | -4.37445400 | -3.36385700 | -2.86366200 |
| C  | -6.73677300 | -2.32331700 | -2.01579400 |
| H  | -7.40670200 | -1.52105300 | -1.69931500 |
| H  | -6.65602000 | -2.29752300 | -3.10510100 |
| H  | -7.20408200 | -3.27513600 | -1.74338900 |
| C  | -1.77783800 | -3.33688200 | -1.96280700 |
| H  | -1.00249900 | -2.57673900 | -2.11594600 |
| H  | -1.35922000 | -4.10384400 | -1.30256600 |
| H  | -2.01911200 | -3.80376500 | -2.91920300 |
| C  | -3.80363400 | -0.55607400 | 1.70662200  |
| H  | -3.27026800 | -1.13723100 | 2.46610900  |
| H  | -3.23239100 | 0.36037700  | 1.50988000  |
| H  | -4.76995500 | -0.25524500 | 2.11375900  |
| C  | -1.39651500 | 2.83705800  | -0.35665500 |
| C  | -0.58434300 | 1.63631600  | 0.08325900  |
| H  | -1.47739600 | 2.81940700  | -1.44933200 |
| C  | -1.09684400 | 0.38771900  | -0.32875800 |
| O  | -1.81376500 | 0.24557000  | -1.33164100 |
| C  | -2.77975100 | 2.81708700  | 0.25842100  |

|   |             |             |             |
|---|-------------|-------------|-------------|
| C | -2.97930400 | 3.26371400  | 1.56927000  |
| C | -3.87235100 | 2.30246800  | -0.44680400 |
| C | -4.23718800 | 3.19744800  | 2.16333500  |
| H | -2.13728700 | 3.66875900  | 2.12642100  |
| C | -5.13271700 | 2.23730700  | 0.14408600  |
| H | -3.71740300 | 1.93366300  | -1.45530600 |
| C | -5.31987500 | 2.68385600  | 1.45050000  |
| H | -4.37420500 | 3.55248600  | 3.18023200  |
| H | -5.96931000 | 1.83372800  | -0.41873600 |
| H | -6.30181300 | 2.63390300  | 1.91066700  |
| H | -0.11835500 | 1.72231600  | 1.06029600  |
| H | -0.87238800 | 3.75345400  | -0.06980600 |
| C | 1.07572300  | 1.66742400  | -1.27168800 |
| C | 0.58674400  | 1.28272100  | -2.52242600 |
| H | 1.59122800  | 0.88311500  | -0.72637300 |
| C | 0.39596400  | -0.09676200 | -2.78475000 |
| H | -0.05584600 | -0.35198600 | -3.76106100 |
| O | 0.69896400  | -1.02453800 | -2.00305500 |
| C | 1.58918700  | 3.02151900  | -0.95895300 |
| C | 2.43291800  | 3.18372400  | 0.14762600  |
| C | 1.26611400  | 4.14997800  | -1.72232500 |
| C | 2.93840500  | 4.43380000  | 0.48741100  |
| H | 2.70392200  | 2.30874200  | 0.73686800  |
| C | 1.76897300  | 5.40244400  | -1.38301100 |
| H | 0.61426500  | 4.04948200  | -2.58460800 |
| C | 2.60494700  | 5.55022700  | -0.27756600 |
| H | 3.59559500  | 4.53673000  | 1.34499800  |
| H | 1.50821200  | 6.26670000  | -1.98551600 |
| H | 2.99688500  | 6.52783100  | -0.01671100 |
| H | 0.25158100  | 2.00274100  | -3.26057400 |

TS4<sup>H</sup>-SS

|   |             |             |             |
|---|-------------|-------------|-------------|
| C | -2.00953700 | -3.65959200 | -1.24264000 |
| C | -1.20476700 | -2.71493400 | -0.60262700 |
| C | -1.26546800 | -2.51730100 | 0.76944500  |
| C | -2.19134300 | -3.27240800 | 1.48480700  |
| C | -3.02397100 | -4.19973100 | 0.86604800  |
| C | -2.92782200 | -4.40066600 | -0.51144200 |
| C | -1.67393800 | -3.72326900 | -2.71551300 |
| C | -0.27795400 | -3.09579000 | -2.76147200 |
| C | -0.33464500 | -2.03143200 | -1.64086600 |
| H | -0.62251700 | -1.80729000 | 1.28013000  |
| H | -3.73009800 | -4.76970800 | 1.45859500  |
| H | -3.55649400 | -5.14168900 | -0.99443500 |

|    |             |             |             |
|----|-------------|-------------|-------------|
| H  | -1.65477400 | -4.73843500 | -3.11696400 |
| H  | -0.00390800 | -2.66324000 | -3.73114600 |
| H  | -0.80078300 | -1.12173000 | -2.02825000 |
| H  | -2.37486800 | -3.12896600 | -3.31160700 |
| Br | -2.31453200 | -3.01922400 | 3.35924500  |
| O  | 0.63728500  | -4.11481300 | -2.39063000 |
| C  | 1.97294600  | -3.66962800 | -2.36342700 |
| H  | 2.59013100  | -4.47956500 | -1.97342900 |
| H  | 2.32411300  | -3.41082400 | -3.37209400 |
| N  | 1.01081500  | -1.68293100 | -1.19621400 |
| C  | 1.46279600  | -0.58281400 | -0.54462400 |
| C  | 2.10129000  | -2.45717500 | -1.49114500 |
| N  | 3.18858500  | -1.94276600 | -1.00712800 |
| N  | 2.77757500  | -0.78747100 | -0.40398500 |
| C  | 3.76861800  | -0.00297200 | 0.28457800  |
| C  | 4.72623400  | 0.65753600  | -0.48264800 |
| C  | 3.76402600  | 0.00251200  | 1.68131300  |
| C  | 5.71348200  | 1.36544400  | 0.20492400  |
| C  | 4.77124000  | 0.72138700  | 2.31860200  |
| C  | 5.75006400  | 1.41099100  | 1.59782300  |
| H  | 6.47062300  | 1.89548800  | -0.36760800 |
| H  | 4.79266300  | 0.74389100  | 3.40544300  |
| C  | 6.80807100  | 2.20576200  | 2.31882400  |
| H  | 6.40774600  | 3.16964500  | 2.64884000  |
| H  | 7.16096000  | 1.67645000  | 3.20738600  |
| H  | 7.66443800  | 2.40426300  | 1.67111700  |
| C  | 2.69714600  | -0.71484700 | 2.46354800  |
| H  | 1.75486600  | -0.15708400 | 2.42067900  |
| H  | 2.51125900  | -1.71811800 | 2.06757600  |
| H  | 2.98658600  | -0.80774600 | 3.51134700  |
| C  | 4.69943300  | 0.60112200  | -1.98696700 |
| H  | 5.13127800  | -0.34004700 | -2.34275100 |
| H  | 3.67442200  | 0.65740200  | -2.36753600 |
| H  | 5.28504300  | 1.42168200  | -2.40598700 |
| C  | -1.25910700 | 1.43648400  | 1.25331000  |
| C  | -0.65094400 | 0.70255200  | 0.05181700  |
| H  | -0.57690400 | 1.27542300  | 2.10033100  |
| C  | 0.75984000  | 0.63535200  | -0.00736600 |
| O  | 1.50851100  | 1.57653400  | 0.31130800  |
| C  | -1.56284600 | 2.92133300  | 1.20905600  |
| C  | -0.57417600 | 3.86479300  | 0.91028200  |
| C  | -2.84161500 | 3.37318000  | 1.53984100  |
| C  | -0.87577100 | 5.22427100  | 0.90578900  |
| H  | 0.42176100  | 3.50981700  | 0.66590000  |

|   |             |             |             |
|---|-------------|-------------|-------------|
| C | -3.14238800 | 4.73311800  | 1.54731100  |
| H | -3.61948200 | 2.64865600  | 1.76864100  |
| C | -2.16101300 | 5.66479700  | 1.22119200  |
| H | -0.10105300 | 5.94533900  | 0.66063500  |
| H | -4.14783300 | 5.06175100  | 1.79349400  |
| H | -2.39261900 | 6.72552100  | 1.21715300  |
| H | -1.19311700 | -0.20082000 | -0.19355600 |
| H | -2.18819600 | 0.91580000  | 1.50804900  |
| C | -1.03622300 | 1.78253100  | -1.79140500 |
| C | 0.04451600  | 2.63019800  | -2.04108800 |
| H | -0.96329400 | 0.83318800  | -2.31376200 |
| C | 1.24725400  | 2.02978000  | -2.47957600 |
| H | 2.12106800  | 2.68958900  | -2.63027500 |
| O | 1.37422900  | 0.79910700  | -2.67320500 |
| C | -2.43329000 | 2.25288700  | -1.60371900 |
| C | -2.78649300 | 3.59536400  | -1.77556000 |
| C | -3.44488300 | 1.33231300  | -1.30046800 |
| C | -4.10647200 | 4.00762400  | -1.62562600 |
| H | -2.02196500 | 4.32371600  | -2.02427000 |
| C | -4.76386500 | 1.74205500  | -1.14363200 |
| H | -3.18989300 | 0.28191400  | -1.17456300 |
| C | -5.09935500 | 3.08609900  | -1.30240300 |
| H | -4.35810000 | 5.05578000  | -1.75453200 |
| H | -5.53070300 | 1.01314600  | -0.90061500 |
| H | -6.12806300 | 3.41012100  | -1.18080800 |
| H | 0.03286200  | 3.68353800  | -1.78898000 |

TS4<sup>H</sup>-SR

|   |             |             |             |
|---|-------------|-------------|-------------|
| C | -2.63924500 | 1.53515900  | -2.09477700 |
| C | -1.63282800 | 0.71475900  | -1.57853400 |
| C | -1.75681200 | -0.66702000 | -1.57669000 |
| C | -2.95404900 | -1.20451200 | -2.04478800 |
| C | -3.98901600 | -0.40566900 | -2.51901500 |
| C | -3.82430900 | 0.97922700  | -2.55665200 |
| C | -2.20252400 | 2.98100200  | -2.08292300 |
| C | -0.68540700 | 2.86905500  | -1.91740800 |
| C | -0.50770100 | 1.59201100  | -1.06556000 |
| H | -0.95812500 | -1.31415400 | -1.22727700 |
| H | -4.90487600 | -0.86458500 | -2.87260400 |
| H | -4.61361300 | 1.60643100  | -2.95850400 |
| H | -2.44987400 | 3.51636700  | -3.00216100 |
| H | -0.21046900 | 3.74341700  | -1.45455600 |
| H | -0.63546800 | 1.82927900  | -0.00452900 |
| H | -2.63400400 | 3.51934400  | -1.23389500 |

|    |             |             |             |
|----|-------------|-------------|-------------|
| Br | -3.18042000 | -3.08694500 | -2.03083700 |
| O  | -0.15871100 | 2.63662700  | -3.21738900 |
| C  | 1.24065300  | 2.49622400  | -3.23283700 |
| H  | 1.53756700  | 2.19502000  | -4.23824600 |
| H  | 1.73743800  | 3.44544000  | -2.98761500 |
| N  | 0.84564600  | 1.06752100  | -1.22186300 |
| C  | 1.57901900  | 0.30059200  | -0.37960200 |
| C  | 1.67790600  | 1.46869400  | -2.23228200 |
| N  | 2.85808800  | 0.94437300  | -2.10775300 |
| N  | 2.77929200  | 0.20619100  | -0.96148900 |
| C  | 3.94357100  | -0.53846800 | -0.56087700 |
| C  | 5.05057500  | 0.18010800  | -0.11225200 |
| C  | 3.93025900  | -1.92733900 | -0.69664800 |
| C  | 6.19141300  | -0.55162600 | 0.21771500  |
| C  | 5.09470200  | -2.61105400 | -0.35560400 |
| C  | 6.23089200  | -1.94148700 | 0.10491000  |
| H  | 7.06912700  | -0.01897100 | 0.57543200  |
| H  | 5.11462600  | -3.69378400 | -0.45224500 |
| C  | 7.46481900  | -2.71162400 | 0.49896400  |
| H  | 7.38950100  | -3.05452600 | 1.53589100  |
| H  | 7.59671800  | -3.59472000 | -0.13055900 |
| H  | 8.36044500  | -2.09186000 | 0.41887700  |
| C  | 2.69924700  | -2.65493400 | -1.16561600 |
| H  | 1.93674600  | -2.66274500 | -0.37843400 |
| H  | 2.26203000  | -2.17896700 | -2.04876300 |
| H  | 2.93709400  | -3.68994400 | -1.41540500 |
| C  | 5.01048700  | 1.68052400  | 0.00888600  |
| H  | 5.80217800  | 2.02711800  | 0.67578200  |
| H  | 5.15947300  | 2.15008400  | -0.96880200 |
| H  | 4.04299300  | 2.02214000  | 0.39180800  |
| C  | -0.28935800 | -1.70553400 | 2.32934300  |
| C  | -0.05776400 | -0.53794600 | 1.37875000  |
| H  | 0.23282500  | -1.53631600 | 3.27675100  |
| C  | 1.26212500  | -0.36855000 | 0.93088100  |
| O  | 2.25512900  | -0.69381000 | 1.61193900  |
| C  | -1.76344600 | -1.94184000 | 2.55070700  |
| C  | -2.38767200 | -1.70012500 | 3.77542900  |
| C  | -2.55248100 | -2.35564600 | 1.47171000  |
| C  | -3.76990600 | -1.84083500 | 3.90970900  |
| H  | -1.79003500 | -1.39485100 | 4.63105200  |
| C  | -3.93001800 | -2.49104600 | 1.59552900  |
| H  | -2.07655600 | -2.57623200 | 0.51972500  |
| C  | -4.54549000 | -2.22641200 | 2.81974400  |
| H  | -4.23958300 | -1.64355400 | 4.86820400  |

|   |             |             |            |
|---|-------------|-------------|------------|
| H | -4.51241800 | -2.80175900 | 0.73271200 |
| H | -5.62098800 | -2.32690100 | 2.92400500 |
| H | -0.88507600 | -0.28676100 | 0.72631300 |
| H | 0.16344400  | -2.60861400 | 1.89609700 |
| C | -0.15056400 | 1.08266600  | 2.92352400 |
| C | 1.17525500  | 1.32523700  | 3.27496800 |
| H | -0.68799800 | 0.41992900  | 3.60047800 |
| C | 2.10300600  | 1.94134000  | 2.38927300 |
| H | 3.14805100  | 2.00748900  | 2.74647300 |
| O | 1.83010500  | 2.33412300  | 1.23880100 |
| C | -1.08940400 | 2.04839300  | 2.28422100 |
| C | -0.77658500 | 3.40480400  | 2.13112200 |
| C | -2.37850100 | 1.61875800  | 1.92985800 |
| C | -1.71180600 | 4.29642800  | 1.61259000 |
| H | 0.20551200  | 3.75617700  | 2.42279900 |
| C | -3.31384500 | 2.50804100  | 1.41191600 |
| H | -2.64418500 | 0.57119200  | 2.05776700 |
| C | -2.98451300 | 3.85444300  | 1.25420200 |
| H | -1.45007300 | 5.34428200  | 1.50325700 |
| H | -4.30161000 | 2.15073000  | 1.13772400 |
| H | -3.71549900 | 4.55366000  | 0.85947700 |
| H | 1.59189500  | 0.80734200  | 4.13184000 |

TS4<sup>H</sup>-RS

|    |             |             |             |
|----|-------------|-------------|-------------|
| C  | -2.94995800 | -4.39720400 | 0.21415500  |
| C  | -2.19873100 | -3.22254300 | 0.27641300  |
| C  | -2.38812400 | -2.18921300 | -0.62997500 |
| C  | -3.39939500 | -2.34426100 | -1.57362600 |
| C  | -4.14258900 | -3.51581000 | -1.67511700 |
| C  | -3.90499100 | -4.56046500 | -0.78040500 |
| C  | -2.58911900 | -5.30669700 | 1.36655700  |
| C  | -1.99953800 | -4.32718100 | 2.38785800  |
| C  | -1.29464400 | -3.27601000 | 1.49430600  |
| H  | -1.80350700 | -1.27410500 | -0.61975200 |
| H  | -4.91850200 | -3.59991400 | -2.42717500 |
| H  | -4.49726700 | -5.46784400 | -0.84034800 |
| H  | -3.44189300 | -5.83833700 | 1.79318800  |
| H  | -1.30878200 | -4.78565500 | 3.10532000  |
| H  | -0.28088100 | -3.58992500 | 1.25375200  |
| H  | -1.83404300 | -6.04313200 | 1.07178100  |
| Br | -3.83038700 | -0.87431100 | -2.69024600 |
| O  | -3.10390100 | -3.75228000 | 3.07075300  |
| C  | -2.71711000 | -2.75472200 | 3.98790300  |
| H  | -3.61469600 | -2.35562000 | 4.45962000  |

|   |             |             |             |
|---|-------------|-------------|-------------|
| H | -2.05307100 | -3.16171500 | 4.76282200  |
| N | -1.22655300 | -1.96765300 | 2.16972500  |
| C | -0.70197700 | -0.80535000 | 1.70964800  |
| C | -2.00853100 | -1.66656500 | 3.24475500  |
| N | -2.03031600 | -0.38658300 | 3.46359200  |
| N | -1.23409800 | 0.14833600  | 2.48980300  |
| C | -1.34416700 | 1.58396500  | 2.33590600  |
| C | -0.56280300 | 2.44099000  | 3.11066600  |
| C | -2.39798700 | 2.03381400  | 1.52498400  |
| C | -0.78589100 | 3.81312500  | 2.95627600  |
| C | -2.58819100 | 3.40746000  | 1.42691000  |
| C | -1.77390600 | 4.31291800  | 2.11196500  |
| H | -0.17208100 | 4.50354400  | 3.53086500  |
| H | -3.37727200 | 3.78246500  | 0.77887600  |
| C | -1.95365000 | 5.79720000  | 1.93611500  |
| H | -1.90424700 | 6.31825600  | 2.89555200  |
| H | -1.15995200 | 6.20234300  | 1.29904000  |
| H | -2.90861500 | 6.02650000  | 1.45885100  |
| C | -3.27586100 | 1.08315400  | 0.75566600  |
| H | -2.75379100 | 0.70824700  | -0.13158000 |
| H | -3.57978400 | 0.22342700  | 1.36137100  |
| H | -4.17714600 | 1.59478400  | 0.41300100  |
| C | 0.43690600  | 1.95807600  | 4.12685900  |
| H | 0.01403900  | 2.06513300  | 5.13105500  |
| H | 0.71870800  | 0.91662700  | 3.97347500  |
| H | 1.34159400  | 2.57200100  | 4.08532400  |
| C | 1.62659200  | -0.30737400 | -1.41171000 |
| C | 0.80761300  | 0.19004700  | -0.20962900 |
| H | 2.45487900  | -0.91616100 | -1.03946000 |
| C | 0.37492000  | -0.88893700 | 0.63073600  |
| O | 0.96405500  | -1.97276800 | 0.60853500  |
| C | 0.77118800  | -1.10795300 | -2.36964000 |
| C | -0.03208200 | -0.45671600 | -3.31292800 |
| C | 0.73979300  | -2.50557300 | -2.31393500 |
| C | -0.85625600 | -1.18290200 | -4.16718400 |
| H | -0.00943100 | 0.62820300  | -3.37163800 |
| C | -0.09226500 | -3.23213900 | -3.16305700 |
| H | 1.36322100  | -3.01550200 | -1.58729100 |
| C | -0.89807800 | -2.57341000 | -4.08814000 |
| H | -1.47863500 | -0.66116600 | -4.88739100 |
| H | -0.11166700 | -4.31609700 | -3.09940300 |
| H | -1.55258000 | -3.13783400 | -4.74529900 |
| C | -0.05346900 | 1.28006100  | -0.54598300 |
| C | -0.65512400 | 2.22392500  | -1.01650300 |

|   |             |             |             |
|---|-------------|-------------|-------------|
| C | -1.48082200 | 3.28301600  | -1.51215200 |
| C | -2.68576600 | 2.98001400  | -2.16271400 |
| C | -1.12476900 | 4.62252200  | -1.30113400 |
| C | -3.53236900 | 4.00588000  | -2.56987100 |
| H | -2.94576000 | 1.93948300  | -2.33372800 |
| C | -1.97408100 | 5.64158900  | -1.71447800 |
| H | -0.18728900 | 4.84253200  | -0.79924000 |
| C | -3.18236600 | 5.33595000  | -2.34170900 |
| H | -4.46742900 | 3.76716100  | -3.06598700 |
| H | -1.69759900 | 6.67679500  | -1.54125300 |
| H | -3.84683400 | 6.13360100  | -2.65718400 |
| H | 2.03494800  | 0.56957800  | -1.92035100 |
| C | 2.25908100  | 0.90587700  | 1.08761100  |
| C | 3.07741600  | -0.19150700 | 1.48321400  |
| H | 1.53874000  | 1.16933000  | 1.85909100  |
| C | 2.61267200  | -1.01340700 | 2.56418000  |
| H | 3.28279200  | -1.85231300 | 2.83250800  |
| O | 1.55630500  | -0.84630800 | 3.18929300  |
| C | 2.73980900  | 2.09860100  | 0.34721400  |
| C | 2.14240700  | 3.33275700  | 0.64168400  |
| C | 3.74632600  | 2.06429900  | -0.62906300 |
| C | 2.55681900  | 4.50075700  | 0.00956400  |
| H | 1.34133600  | 3.36973400  | 1.37538800  |
| C | 4.15096100  | 3.23161900  | -1.27030500 |
| H | 4.21176100  | 1.12143100  | -0.88796300 |
| C | 3.56473400  | 4.45454400  | -0.95096200 |
| H | 2.09139100  | 5.44727600  | 0.26914200  |
| H | 4.93122100  | 3.18345500  | -2.02348100 |
| H | 3.88867800  | 5.36284900  | -1.44859500 |
| C | 4.29751100  | -0.57234300 | 0.86992600  |
| C | 5.35633300  | -0.93664900 | 0.39045400  |
| C | 6.59756700  | -1.31992100 | -0.20337300 |
| C | 7.22388400  | -0.47846600 | -1.13925900 |
| C | 7.21283700  | -2.53739700 | 0.13307600  |
| C | 8.42859600  | -0.85029300 | -1.72283400 |
| H | 6.75672800  | 0.46706900  | -1.39672500 |
| C | 8.41992300  | -2.89930600 | -0.45312100 |
| H | 6.73303000  | -3.19030800 | 0.85465600  |
| C | 9.03235600  | -2.06055600 | -1.38327300 |
| H | 8.90025900  | -0.19104500 | -2.44458700 |
| H | 8.88443400  | -3.84246500 | -0.18350600 |
| H | 9.97387200  | -2.34740900 | -1.83972900 |

TS4<sup>H</sup>-RR



|    |             |             |             |
|----|-------------|-------------|-------------|
| C  | -5.04410500 | 0.85506700  | -1.20684500 |
| C  | -3.69309600 | 0.73238100  | -0.87290500 |
| C  | -3.01085800 | -0.45816700 | -1.01408800 |
| C  | -3.73572500 | -1.55734300 | -1.46486200 |
| C  | -5.08048400 | -1.47104700 | -1.80201400 |
| C  | -5.74223000 | -0.24543500 | -1.68038800 |
| C  | -5.49731800 | 2.28173700  | -0.99482600 |
| C  | -4.16967600 | 3.04299600  | -1.05091400 |
| C  | -3.18839900 | 2.06393200  | -0.36213000 |
| H  | -1.96246600 | -0.56080000 | -0.76023500 |
| H  | -5.60828300 | -2.35093900 | -2.15193900 |
| H  | -6.78872000 | -0.16591100 | -1.95698600 |
| H  | -6.18914500 | 2.64817800  | -1.75547800 |
| H  | -4.18213100 | 4.03549100  | -0.58532000 |
| H  | -3.26320600 | 2.13555800  | 0.72753600  |
| H  | -5.96009600 | 2.40608300  | -0.00887700 |
| Br | -2.85463200 | -3.23541000 | -1.49883600 |
| O  | -3.84073300 | 3.13142600  | -2.43122000 |
| C  | -2.59789200 | 3.72947900  | -2.69499900 |
| H  | -2.37722000 | 3.59353400  | -3.75431300 |
| H  | -2.61528300 | 4.80604500  | -2.47429000 |
| N  | -1.80781600 | 2.39529600  | -0.73352300 |
| C  | -0.63857800 | 2.14533700  | -0.09443100 |
| C  | -1.51609500 | 3.11429900  | -1.85704500 |
| N  | -0.23663500 | 3.30228300  | -1.96435800 |
| N  | 0.29962600  | 2.69744900  | -0.86213900 |
| C  | 1.71640600  | 2.93256200  | -0.68330800 |
| C  | 2.07723700  | 4.14793600  | -0.09407600 |
| C  | 2.61665000  | 2.07380900  | -1.31124300 |
| C  | 3.42773800  | 4.48289600  | -0.12084600 |
| C  | 3.95895900  | 2.44847100  | -1.29421300 |
| C  | 4.37873900  | 3.64378000  | -0.70932100 |
| H  | 3.74584900  | 5.41498700  | 0.33876400  |
| H  | 4.68761800  | 1.78598600  | -1.75534700 |
| C  | 5.84122100  | 4.00141700  | -0.67122800 |
| H  | 6.37959900  | 3.55574900  | -1.51058400 |
| H  | 5.98649100  | 5.08367300  | -0.69687200 |
| H  | 6.29752100  | 3.62803000  | 0.25184000  |
| C  | 2.15266700  | 0.81217200  | -1.98047900 |
| H  | 1.71318900  | 0.13670600  | -1.24116700 |
| H  | 1.39788700  | 1.02920500  | -2.74480200 |
| H  | 2.99134500  | 0.29453900  | -2.45026300 |
| C  | 1.04329800  | 5.02953300  | 0.54891100  |
| H  | 0.53214800  | 4.48485400  | 1.34924100  |

|   |             |             |             |
|---|-------------|-------------|-------------|
| H | 1.51412500  | 5.91153600  | 0.98456200  |
| H | 0.29741100  | 5.36171800  | -0.18129900 |
| C | -1.26577500 | -0.23921900 | 2.87321600  |
| C | -0.34086900 | 0.27659300  | 1.75078300  |
| H | -1.18333800 | 0.45176300  | 3.71824500  |
| C | -0.66652000 | 1.64374200  | 1.37220900  |
| O | -1.12983000 | 2.49037700  | 2.12452600  |
| C | -2.71359700 | -0.41054900 | 2.48580400  |
| C | -3.14283100 | -1.60744300 | 1.90448100  |
| C | -3.65588800 | 0.59336800  | 2.73533400  |
| C | -4.48094000 | -1.79629600 | 1.57013500  |
| H | -2.41656000 | -2.39055800 | 1.69599600  |
| C | -4.99349100 | 0.41186100  | 2.38859300  |
| H | -3.33096800 | 1.51700500  | 3.20786600  |
| C | -5.40874600 | -0.78435700 | 1.80404500  |
| H | -4.78923600 | -2.72704000 | 1.10237900  |
| H | -5.71515900 | 1.19811900  | 2.59086800  |
| H | -6.45048600 | -0.92642700 | 1.53407700  |
| C | -0.08817000 | -0.65410900 | 0.69403900  |
| C | 0.17602400  | -1.52901300 | -0.10682900 |
| C | 0.56856500  | -2.57762700 | -0.99519900 |
| C | 0.71994100  | -2.34535900 | -2.37014800 |
| C | 0.83013700  | -3.85548700 | -0.47566600 |
| C | 1.16130300  | -3.36656400 | -3.20247100 |
| H | 0.49426800  | -1.36325800 | -2.77268200 |
| C | 1.26469100  | -4.87289200 | -1.31799200 |
| H | 0.69825700  | -4.03030500 | 0.58787300  |
| C | 1.43962400  | -4.62967100 | -2.68010900 |
| H | 1.28701800  | -3.17777400 | -4.26351500 |
| H | 1.47130500  | -5.85676400 | -0.90973800 |
| H | 1.78517400  | -5.42383200 | -3.33378900 |
| H | -0.88014900 | -1.20632400 | 3.19581400  |
| C | 1.41517500  | 0.33538700  | 2.74716000  |
| C | 2.52568900  | 0.81896400  | 1.99178600  |
| H | 1.05924200  | 1.10356200  | 3.43580500  |
| C | 2.83434100  | 2.21088400  | 2.12019400  |
| H | 3.78988800  | 2.51161400  | 1.64816800  |
| O | 2.14102100  | 3.05228900  | 2.70298300  |
| C | 1.49252700  | -1.01529900 | 3.37314800  |
| C | 1.19840200  | -1.12737000 | 4.73922700  |
| C | 1.88556600  | -2.16982700 | 2.67991200  |
| C | 1.28890800  | -2.34982100 | 5.39770300  |
| H | 0.89479800  | -0.24005300 | 5.28853500  |
| C | 1.96602100  | -3.39408500 | 3.33759000  |

|   |            |             |             |
|---|------------|-------------|-------------|
| H | 2.13085600 | -2.10640100 | 1.62713600  |
| C | 1.66806200 | -3.49140100 | 4.69567500  |
| H | 1.05947200 | -2.40970700 | 6.45670700  |
| H | 2.27256100 | -4.27692000 | 2.78420200  |
| H | 1.73551700 | -4.44833600 | 5.20303100  |
| C | 3.34084300 | 0.03845200  | 1.14246800  |
| C | 4.05327600 | -0.56077400 | 0.35342700  |
| C | 4.78331200 | -1.23729200 | -0.66832100 |
| C | 6.01778800 | -0.73894900 | -1.12330700 |
| C | 4.26134300 | -2.39838300 | -1.26956300 |
| C | 6.70232100 | -1.38047700 | -2.14960200 |
| H | 6.42809800 | 0.15366000  | -0.66052900 |
| C | 4.95654000 | -3.03508400 | -2.29019400 |
| H | 3.30314200 | -2.78657600 | -0.93601200 |
| C | 6.17808900 | -2.53120500 | -2.73720800 |
| H | 7.65260900 | -0.98111200 | -2.49007200 |
| H | 4.53269300 | -3.92667400 | -2.74288600 |
| H | 6.71590200 | -3.02952100 | -3.53698600 |

TS4<sup>H</sup>-SS

|    |            |             |             |
|----|------------|-------------|-------------|
| C  | 3.96583100 | -1.09233600 | -3.09098500 |
| C  | 3.06680300 | -0.59367200 | -2.14414300 |
| C  | 3.11421200 | -0.99203500 | -0.81971500 |
| C  | 4.07515800 | -1.94011800 | -0.46574700 |
| C  | 4.96124200 | -2.47241900 | -1.39533400 |
| C  | 4.90962300 | -2.03922900 | -2.72207100 |
| C  | 3.74346500 | -0.41869600 | -4.42657300 |
| C  | 3.00144100 | 0.85346600  | -4.01315300 |
| C  | 2.12394700 | 0.36709600  | -2.84077600 |
| H  | 2.43242800 | -0.58846800 | -0.07990100 |
| H  | 5.69414800 | -3.20722100 | -1.08308100 |
| H  | 5.61583200 | -2.43226200 | -3.44640200 |
| H  | 4.66645300 | -0.18002000 | -4.95847500 |
| H  | 2.42354700 | 1.33301600  | -4.81199200 |
| H  | 1.23274800 | -0.16576600 | -3.19766400 |
| H  | 3.10720100 | -1.02600700 | -5.07939300 |
| Br | 4.16668800 | -2.51047100 | 1.34156300  |
| O  | 3.99479100 | 1.73773600  | -3.50253800 |
| C  | 3.49313000 | 2.95469300  | -3.01262000 |
| H  | 4.29812800 | 3.45586200  | -2.47324700 |
| H  | 3.15828900 | 3.60832000  | -3.83012200 |
| N  | 1.66715800 | 1.52719900  | -2.06774900 |
| C  | 0.54591300 | 1.70511200  | -1.34143000 |
| C  | 2.31595600 | 2.73389300  | -2.10589400 |

|   |             |             |             |
|---|-------------|-------------|-------------|
| N | 1.67218200  | 3.63327600  | -1.42080000 |
| N | 0.57578700  | 2.97736100  | -0.94936600 |
| C | -0.44691400 | 3.73360300  | -0.26432300 |
| C | -1.44894300 | 4.30851100  | -1.06304800 |
| C | -0.32816700 | 3.96893300  | 1.10367900  |
| C | -2.40215600 | 5.08886800  | -0.41895100 |
| C | -1.29418300 | 4.79102100  | 1.69032800  |
| C | -2.34260500 | 5.33670400  | 0.95768900  |
| H | -3.19654300 | 5.53858300  | -1.00884600 |
| H | -1.22392200 | 4.98885300  | 2.75691700  |
| C | -3.40530600 | 6.16913300  | 1.62496600  |
| H | -4.33891200 | 5.60220500  | 1.70394600  |
| H | -3.10360900 | 6.46511100  | 2.63169700  |
| H | -3.62060900 | 7.07107900  | 1.04653500  |
| C | 0.75842800  | 3.37524900  | 1.95572900  |
| H | 1.57189800  | 2.95710400  | 1.36130000  |
| H | 1.16980700  | 4.13615400  | 2.62278200  |
| H | 0.34484300  | 2.56875500  | 2.56985600  |
| C | -1.45284000 | 4.14206500  | -2.55948700 |
| H | -0.52195200 | 4.52758300  | -2.98856100 |
| H | -1.54673400 | 3.09137500  | -2.84479200 |
| H | -2.28347700 | 4.69679800  | -2.99741200 |
| C | -2.31527700 | -0.06496700 | 0.51357600  |
| C | -0.87350000 | -0.02245700 | -0.03682900 |
| H | -2.64038500 | -1.10022700 | 0.61887400  |
| C | -0.71531900 | 0.83788100  | -1.19224000 |
| O | -1.53535100 | 0.96417300  | -2.09082400 |
| C | -2.46676400 | 0.61270700  | 1.85241800  |
| C | -2.90876600 | 1.93037500  | 1.95709600  |
| C | -2.15210800 | -0.09098500 | 3.02165700  |
| C | -3.04982800 | 2.53228600  | 3.20780900  |
| H | -3.14119700 | 2.49192700  | 1.05354600  |
| C | -2.27900100 | 0.51052600  | 4.26872400  |
| H | -1.80179100 | -1.11866500 | 2.93958900  |
| C | -2.73412900 | 1.82636300  | 4.36491900  |
| H | -3.40585600 | 3.55639600  | 3.27494300  |
| H | -2.02944500 | -0.04625300 | 5.16663600  |
| H | -2.84359400 | 2.29592100  | 5.33729300  |
| C | 0.18068900  | 0.08404000  | 0.92798100  |
| C | 1.08554600  | 0.08302200  | 1.73736100  |
| C | 2.19412800  | 0.01170000  | 2.63596000  |
| C | 3.36558800  | 0.73893400  | 2.37687400  |
| C | 2.14107900  | -0.84935300 | 3.74201900  |
| C | 4.47058300  | 0.59536200  | 3.20709000  |

|   |             |             |             |
|---|-------------|-------------|-------------|
| H | 3.40844600  | 1.39198600  | 1.51003000  |
| C | 3.25306400  | -0.98951800 | 4.56300000  |
| H | 1.23345100  | -1.41506000 | 3.92744900  |
| C | 4.41923200  | -0.27094300 | 4.29732400  |
| H | 5.37716100  | 1.15326000  | 2.99716500  |
| H | 3.21237000  | -1.66343700 | 5.41259900  |
| H | 5.28617000  | -0.38762500 | 4.93918500  |
| H | -2.96469400 | 0.39248900  | -0.23744100 |
| C | -0.69097200 | -1.83401700 | -0.89869000 |
| C | -1.66336100 | -1.93190400 | -1.94789600 |
| H | 0.30606500  | -1.71247200 | -1.32492700 |
| C | -1.23006400 | -1.70003000 | -3.28960700 |
| H | -2.03492200 | -1.76605800 | -4.04771300 |
| O | -0.06654400 | -1.47807600 | -3.65924200 |
| C | -0.65373200 | -2.72684600 | 0.29477800  |
| C | 0.59015700  | -2.96721500 | 0.89562400  |
| C | -1.78067700 | -3.35489100 | 0.84723800  |
| C | 0.70972600  | -3.76304800 | 2.02836500  |
| H | 1.48107300  | -2.52936900 | 0.46175900  |
| C | -1.66365700 | -4.15301700 | 1.98330100  |
| H | -2.75051800 | -3.23795300 | 0.37791900  |
| C | -0.42348700 | -4.35103400 | 2.58691400  |
| H | 1.69333500  | -3.91731000 | 2.46202600  |
| H | -2.54960400 | -4.62750900 | 2.39333700  |
| H | -0.33956200 | -4.97209200 | 3.47302900  |
| C | -3.04854000 | -2.15735300 | -1.76054000 |
| C | -4.24958900 | -2.33116200 | -1.64510800 |
| C | -5.64854900 | -2.52108400 | -1.43755800 |
| C | -6.17155600 | -2.53851900 | -0.13197900 |
| C | -6.52721300 | -2.68960400 | -2.52128300 |
| C | -7.53260300 | -2.72232900 | 0.07802900  |
| H | -5.49763900 | -2.40243500 | 0.70857800  |
| C | -7.88752700 | -2.87007400 | -2.30126200 |
| H | -6.12946300 | -2.67704600 | -3.53067600 |
| C | -8.39712200 | -2.88861600 | -1.00350500 |
| H | -7.92137600 | -2.73357900 | 1.09141300  |
| H | -8.55406900 | -2.99852900 | -3.14826700 |
| H | -9.45960100 | -3.03088800 | -0.83615800 |

TS4<sup>H</sup>-SR

|   |             |             |             |
|---|-------------|-------------|-------------|
| C | -4.93496000 | -1.16730300 | -2.23311400 |
| C | -3.79668600 | -0.99304600 | -1.44593800 |
| C | -3.49770300 | 0.22189200  | -0.85517100 |
| C | -4.33796500 | 1.29292900  | -1.14170100 |

|    |             |             |             |
|----|-------------|-------------|-------------|
| C  | -5.45867600 | 1.15978900  | -1.95658300 |
| C  | -5.76915500 | -0.08890100 | -2.49703400 |
| C  | -5.06930000 | -2.62164700 | -2.63202800 |
| C  | -4.21047900 | -3.31184600 | -1.56680900 |
| C  | -3.05007600 | -2.31080900 | -1.37835600 |
| H  | -2.62762500 | 0.34437000  | -0.21800600 |
| H  | -6.08742300 | 2.01980900  | -2.15572800 |
| H  | -6.65935100 | -0.20769000 | -3.10637000 |
| H  | -6.09652800 | -2.99031000 | -2.60272300 |
| H  | -3.87290200 | -4.32283700 | -1.82337500 |
| H  | -2.30470100 | -2.38464500 | -2.17200200 |
| H  | -4.65892400 | -2.80909400 | -3.63008500 |
| Br | -3.90318100 | 3.00173200  | -0.43273900 |
| O  | -5.01417000 | -3.32431200 | -0.39102300 |
| C  | -4.36287500 | -3.78432400 | 0.76437200  |
| H  | -5.00621700 | -3.57306000 | 1.61934300  |
| H  | -4.18589900 | -4.86857100 | 0.71817300  |
| N  | -2.36658300 | -2.55677500 | -0.10665300 |
| C  | -1.11075900 | -2.25734200 | 0.30658600  |
| C  | -3.02607100 | -3.12594100 | 0.94535900  |
| N  | -2.27154800 | -3.16900100 | 2.00331900  |
| N  | -1.09124300 | -2.62959000 | 1.59318500  |
| C  | -0.02613500 | -2.54177400 | 2.55785200  |
| C  | 0.95899600  | -3.52848500 | 2.56187100  |
| C  | -0.10092100 | -1.51464100 | 3.50197900  |
| C  | 1.97181900  | -3.40315400 | 3.51406100  |
| C  | 0.93331100  | -1.43554300 | 4.43071400  |
| C  | 1.98523800  | -2.35572700 | 4.43676600  |
| H  | 2.76298300  | -4.14800000 | 3.53746200  |
| H  | 0.91337700  | -0.63859600 | 5.17000400  |
| C  | 3.11708400  | -2.21568400 | 5.42048800  |
| H  | 3.57078600  | -3.18381700 | 5.64240700  |
| H  | 3.89934900  | -1.56848400 | 5.01104100  |
| H  | 2.77423500  | -1.76824000 | 6.35592900  |
| C  | -1.27589900 | -0.57592900 | 3.54107600  |
| H  | -1.55132900 | -0.23663200 | 2.53845700  |
| H  | -2.14573500 | -1.07843300 | 3.97617600  |
| H  | -1.04415100 | 0.30424300  | 4.14315300  |
| C  | 0.90488000  | -4.69784900 | 1.61172500  |
| H  | -0.02266600 | -5.26158500 | 1.75438000  |
| H  | 0.93888900  | -4.38816000 | 0.56260500  |
| H  | 1.74519000  | -5.36975000 | 1.79180700  |
| C  | 2.63107200  | -1.93482500 | 0.04478100  |
| C  | 1.26081600  | -1.28280800 | -0.25516900 |

|   |             |             |             |
|---|-------------|-------------|-------------|
| H | 2.47633600  | -2.70568100 | 0.80933400  |
| C | 0.15054800  | -2.16565400 | -0.59839800 |
| O | 0.13869300  | -3.06073900 | -1.43681800 |
| C | 3.52792000  | -2.52939400 | -1.02743600 |
| C | 4.90848900  | -2.39924700 | -0.83551600 |
| C | 3.08063500  | -3.23580000 | -2.14721300 |
| C | 5.81813600  | -2.93859000 | -1.73781700 |
| H | 5.27380900  | -1.83989200 | 0.02240000  |
| C | 3.99174900  | -3.76986500 | -3.05786100 |
| H | 2.01709100  | -3.35303400 | -2.31353600 |
| C | 5.36187100  | -3.62388900 | -2.86175000 |
| H | 6.88339000  | -2.80886200 | -1.57138200 |
| H | 3.62280500  | -4.30397900 | -3.92869900 |
| H | 6.06669500  | -4.03879100 | -3.57552500 |
| C | 0.90642800  | -0.25516100 | 0.66850100  |
| C | 0.62574100  | 0.74820200  | 1.29462300  |
| C | 0.26813900  | 1.92580800  | 2.02008900  |
| C | -0.79138500 | 2.71885400  | 1.55382300  |
| C | 0.94777300  | 2.30125000  | 3.18883000  |
| C | -1.17229900 | 3.85870700  | 2.24894700  |
| H | -1.29732900 | 2.43456100  | 0.63720800  |
| C | 0.56991100  | 3.45429200  | 3.87154000  |
| H | 1.76427900  | 1.68353800  | 3.54988800  |
| C | -0.49027500 | 4.23296200  | 3.40704500  |
| H | -1.99903400 | 4.45780200  | 1.87911900  |
| H | 1.10200400  | 3.74361400  | 4.77212000  |
| H | -0.78177800 | 5.12904500  | 3.94509400  |
| H | 3.21256200  | -1.15705000 | 0.54713000  |
| C | 1.61556600  | -0.06065500 | -1.98065000 |
| C | 0.70437800  | 1.02176800  | -1.89336900 |
| H | 1.27907600  | -0.88860300 | -2.60458000 |
| C | -0.66436800 | 0.67147600  | -1.94423000 |
| H | -1.40767800 | 1.48872600  | -1.85149300 |
| O | -1.04411800 | -0.51187100 | -2.02693300 |
| C | 3.06885400  | 0.23186300  | -2.02888100 |
| C | 3.81779300  | -0.19162300 | -3.13261600 |
| C | 3.70507900  | 0.96347300  | -1.01946600 |
| C | 5.17178800  | 0.10733400  | -3.22858300 |
| H | 3.33152300  | -0.77245400 | -3.91125000 |
| C | 5.06618600  | 1.24281500  | -1.10406400 |
| H | 3.12498000  | 1.29921900  | -0.16439700 |
| C | 5.80201700  | 0.81954400  | -2.20938600 |
| H | 5.73886200  | -0.23067900 | -4.09022000 |
| H | 5.55179600  | 1.79966500  | -0.30860900 |

|   |            |            |             |
|---|------------|------------|-------------|
| H | 6.86226100 | 1.04303900 | -2.27565200 |
| C | 1.03611700 | 2.35939900 | -1.53114300 |
| C | 1.22851200 | 3.51513700 | -1.20554000 |
| C | 1.45948100 | 4.84982600 | -0.73126200 |
| C | 1.67442700 | 5.07873100 | 0.63774100  |
| C | 1.46220700 | 5.94177800 | -1.61241300 |
| C | 1.88553000 | 6.36939700 | 1.10893200  |
| H | 1.66353700 | 4.23549900 | 1.32184200  |
| C | 1.67307300 | 7.23067100 | -1.13421700 |
| H | 1.29637400 | 5.76664400 | -2.67032300 |
| C | 1.88534500 | 7.44863700 | 0.22631100  |
| H | 2.04478900 | 6.53183100 | 2.17058600  |
| H | 1.67196300 | 8.06758800 | -1.82521000 |
| H | 2.04849200 | 8.45558900 | 0.59680100  |

R2CF

|   |             |             |             |
|---|-------------|-------------|-------------|
| C | -3.97461600 | 1.06986100  | 0.00432200  |
| C | -2.85154700 | 1.83048000  | 0.00048300  |
| H | -4.90973600 | 1.62854500  | -0.03798100 |
| C | -3.04297700 | 3.30412100  | -0.03199700 |
| H | -4.10363600 | 3.62289100  | -0.04911400 |
| O | -2.14124900 | 4.11009200  | -0.03871500 |
| C | -4.14416000 | -0.37822900 | 0.03875000  |
| C | -5.43459000 | -0.88249200 | -0.19583200 |
| C | -3.10377400 | -1.28531500 | 0.30326000  |
| C | -5.67849700 | -2.24962800 | -0.19088900 |
| H | -6.24716600 | -0.18775600 | -0.38897100 |
| C | -3.35325100 | -2.65163700 | 0.31568900  |
| H | -2.10719900 | -0.91829300 | 0.51329900  |
| C | -4.63584900 | -3.13850300 | 0.06384400  |
| H | -6.67970500 | -2.62149000 | -0.38035400 |
| H | -2.54308300 | -3.34179800 | 0.52663500  |
| H | -4.82251000 | -4.20733400 | 0.07290300  |
| C | -1.50338900 | 1.36970800  | 0.00013700  |
| C | -0.33347100 | 1.05254500  | -0.01497300 |
| C | 1.03620800  | 0.63942200  | -0.03014900 |
| C | 1.36201100  | -0.70767600 | -0.25189500 |
| C | 2.05826000  | 1.57814200  | 0.17404700  |
| C | 2.68997900  | -1.10835100 | -0.26407900 |
| H | 0.56941900  | -1.42865000 | -0.41986500 |
| C | 3.38588900  | 1.17369500  | 0.16149000  |
| H | 1.80090200  | 2.61822200  | 0.33876100  |
| C | 3.69621900  | -0.16672000 | -0.05641800 |
| H | 2.94666900  | -2.14696100 | -0.44173900 |



|   |            |             |             |
|---|------------|-------------|-------------|
| H | 4.17939000 | 1.89680900  | 0.31365900  |
| C | 5.12732300 | -0.61724100 | -0.01340700 |
| F | 5.34863600 | -1.65313200 | -0.83678800 |
| F | 5.48362600 | -1.02022200 | 1.21844200  |
| F | 5.97307400 | 0.36357300  | -0.36074500 |

TS4CCF-RS

|    |             |             |             |
|----|-------------|-------------|-------------|
| C  | 3.91919600  | 0.81315600  | 3.23555400  |
| C  | 3.50084700  | 0.16933200  | 2.06771400  |
| C  | 3.90318700  | 0.59442600  | 0.81262500  |
| C  | 4.75158400  | 1.69697000  | 0.76615800  |
| C  | 5.17466500  | 2.36615400  | 1.90838200  |
| C  | 4.75284200  | 1.91947300  | 3.16148300  |
| C  | 3.34093500  | 0.13152100  | 4.45582700  |
| C  | 2.92799000  | -1.23868200 | 3.91112400  |
| C  | 2.54221200  | -0.93443200 | 2.44652700  |
| H  | 3.60783300  | 0.09370100  | -0.10482900 |
| H  | 5.83364400  | 3.22208200  | 1.81876500  |
| H  | 5.08809300  | 2.42767000  | 4.06004600  |
| H  | 4.05311900  | 0.02021100  | 5.27617700  |
| H  | 2.10892000  | -1.72192200 | 4.46020700  |
| H  | 1.49677000  | -0.60953700 | 2.37660900  |
| H  | 2.46385800  | 0.66939500  | 4.83354400  |
| Br | 5.32958100  | 2.32312800  | -0.92469100 |
| O  | 4.09373800  | -2.04578400 | 3.93459000  |
| C  | 3.91997000  | -3.34955400 | 3.43319900  |
| H  | 4.91080900  | -3.78463100 | 3.30881300  |
| H  | 3.32808200  | -3.96557300 | 4.12465100  |
| N  | 2.62238600  | -2.17202600 | 1.67583400  |
| C  | 2.00145800  | -2.47299700 | 0.53870300  |
| C  | 3.22258600  | -3.31972900 | 2.10800300  |
| N  | 2.98122500  | -4.31165200 | 1.29445100  |
| N  | 2.21722000  | -3.75609600 | 0.31106000  |
| C  | 1.51878600  | -4.53790500 | -0.67889500 |
| C  | 2.01341800  | -4.62718700 | -1.97943600 |
| C  | 0.31803500  | -5.14223000 | -0.27049200 |
| C  | 1.19861700  | -5.26130600 | -2.92389000 |
| C  | -0.45211000 | -5.75655600 | -1.25242100 |
| C  | -0.03932100 | -5.80132700 | -2.58900600 |
| H  | 1.55265900  | -5.32653400 | -3.94995900 |
| H  | -1.39765000 | -6.21304800 | -0.97119700 |
| C  | -0.92274700 | -6.42265300 | -3.63827900 |
| H  | -1.41211200 | -7.32298400 | -3.25792700 |
| H  | -1.71496500 | -5.72554500 | -3.93143000 |

|   |             |             |             |
|---|-------------|-------------|-------------|
| H | -0.35228200 | -6.68501500 | -4.53149500 |
| C | -0.08340300 | -5.21161200 | 1.18126300  |
| H | 0.47113500  | -6.01617700 | 1.67508600  |
| H | 0.12044600  | -4.28863400 | 1.72991600  |
| H | -1.14939400 | -5.43497600 | 1.26694100  |
| C | 3.38000200  | -4.13879800 | -2.37645200 |
| H | 3.82558900  | -3.46054700 | -1.64889100 |
| H | 4.04833400  | -4.99976500 | -2.48288400 |
| H | 3.33488500  | -3.64064400 | -3.34827600 |
| H | 1.40616300  | -1.80771700 | -0.07153900 |
| B | 5.79265400  | -2.01317600 | 0.19150100  |
| F | 4.47979400  | -2.00694600 | -0.35891400 |
| F | 6.51756200  | -3.04127000 | -0.40366800 |
| F | 5.68014400  | -2.23256200 | 1.57208300  |
| F | 6.38992400  | -0.77844400 | -0.05685100 |
| N | 2.84784400  | 0.61973200  | -2.78143500 |
| C | 1.91214400  | 1.59357400  | -3.33688600 |
| C | 2.52917100  | 2.97485300  | -3.54061400 |
| H | 1.07294100  | 1.66514800  | -2.63392800 |
| H | 1.48037400  | 1.25459900  | -4.29726900 |
| H | 1.74089000  | 3.72290500  | -3.66942500 |
| H | 3.14303800  | 3.25260400  | -2.67913500 |
| H | 3.16122000  | 3.01185000  | -4.43153600 |
| C | 4.03475100  | 0.47183100  | -3.62306400 |
| C | 5.01474600  | -0.57622000 | -3.11615600 |
| H | 4.54563700  | 1.44010300  | -3.63430700 |
| H | 3.75529000  | 0.25290200  | -4.67196400 |
| H | 5.93162500  | -0.52931900 | -3.71073700 |
| H | 5.26876100  | -0.40124700 | -2.06827600 |
| H | 4.61662600  | -1.59164200 | -3.19977800 |
| C | 2.17338200  | -0.64656500 | -2.48543000 |
| C | 1.63523100  | -1.43272700 | -3.68412300 |
| H | 1.33135900  | -0.40158600 | -1.82350000 |
| H | 2.87235800  | -1.27043000 | -1.91457200 |
| H | 1.16270900  | -2.35767700 | -3.33674000 |
| H | 0.87609500  | -0.86635900 | -4.23059600 |
| H | 2.43602000  | -1.70177600 | -4.38181000 |
| C | -1.89310700 | -1.50678300 | -1.13855800 |
| C | -1.06775900 | -1.17518500 | -0.05623000 |
| H | -2.26161700 | -2.53020500 | -1.08780700 |
| C | -1.01214700 | -2.10001300 | 1.04840900  |
| H | -1.61059800 | -3.01661000 | 0.89750700  |
| O | -0.31553900 | -1.96792300 | 2.05904600  |
| C | -1.76796000 | -0.99711300 | -2.52225900 |

|    |             |             |             |
|----|-------------|-------------|-------------|
| C  | -1.93634200 | -1.90809800 | -3.57515500 |
| C  | -1.50258600 | 0.34166800  | -2.83517700 |
| C  | -1.87325900 | -1.48654300 | -4.90008500 |
| H  | -2.11413900 | -2.95500200 | -3.34594500 |
| C  | -1.45142400 | 0.76661400  | -4.15842100 |
| H  | -1.33035800 | 1.05745800  | -2.04256800 |
| C  | -1.64447400 | -0.14395100 | -5.19675000 |
| H  | -2.00509100 | -2.20846700 | -5.69987300 |
| H  | -1.25456500 | 1.81508500  | -4.36297100 |
| H  | -1.60739600 | 0.18895700  | -6.22895800 |
| C  | -0.40945000 | 0.07738400  | 0.08273300  |
| C  | 0.13715600  | 1.15308600  | 0.24479200  |
| C  | 0.66541600  | 2.47208100  | 0.42858300  |
| C  | -0.07450200 | 3.41966100  | 1.15290500  |
| C  | 1.87275600  | 2.84207300  | -0.17609400 |
| C  | 0.38336800  | 4.72444200  | 1.25994300  |
| H  | -1.01797200 | 3.12936600  | 1.60463600  |
| C  | 2.33901200  | 4.14476200  | -0.04941300 |
| H  | 2.43124500  | 2.11312400  | -0.75913600 |
| C  | 1.58865800  | 5.08112200  | 0.65649900  |
| H  | -0.19347000 | 5.46683600  | 1.80102000  |
| H  | 3.28950300  | 4.42191500  | -0.49509800 |
| C  | -5.31054100 | 3.81092000  | -1.57677600 |
| C  | -4.50920400 | 2.85769400  | -0.94134900 |
| C  | -3.13547400 | 2.82007500  | -1.11848400 |
| C  | -2.58596000 | 3.74663800  | -2.00781500 |
| C  | -3.36963000 | 4.67014800  | -2.69095000 |
| C  | -4.74636400 | 4.71112400  | -2.46676800 |
| C  | -6.73466700 | 3.71625400  | -1.07712500 |
| C  | -6.54925800 | 2.98428300  | 0.25422100  |
| C  | -5.39952200 | 2.00146500  | -0.06347600 |
| H  | -2.50324800 | 2.11735300  | -0.57880500 |
| H  | -2.90169800 | 5.37114900  | -3.37228200 |
| H  | -5.35485600 | 5.45819100  | -2.96576600 |
| H  | -7.20746600 | 4.68824400  | -0.92497600 |
| H  | -7.44651900 | 2.48112600  | 0.63374300  |
| H  | -5.78289100 | 1.13010600  | -0.60346000 |
| H  | -7.36459400 | 3.12303500  | -1.74876100 |
| Br | -0.71113100 | 3.76582200  | -2.28430500 |
| O  | -6.07728200 | 3.95257800  | 1.17883300  |
| C  | -5.78829100 | 3.43288200  | 2.45262900  |
| H  | -5.26345700 | 4.20450500  | 3.01738300  |
| H  | -6.70705000 | 3.16557900  | 2.99296100  |
| N  | -4.79487000 | 1.51559100  | 1.17868100  |

|   |             |             |             |
|---|-------------|-------------|-------------|
| C | -4.14760400 | 0.35361300  | 1.45733400  |
| C | -4.94201800 | 2.19648700  | 2.35492200  |
| N | -4.40519700 | 1.54002000  | 3.34096200  |
| N | -3.92276700 | 0.40072300  | 2.77779700  |
| C | -3.33341800 | -0.56282400 | 3.68478300  |
| C | -4.16786700 | -1.53641800 | 4.24209700  |
| C | -2.00811500 | -0.37705900 | 4.06371600  |
| C | -3.59786500 | -2.39650000 | 5.17435200  |
| C | -1.48577100 | -1.26580400 | 5.00433200  |
| C | -2.25630400 | -2.28524000 | 5.55604700  |
| H | -4.21775300 | -3.17013300 | 5.62045400  |
| H | -0.44889400 | -1.14943900 | 5.30886500  |
| C | -1.65900300 | -3.26094300 | 6.53602400  |
| H | -1.37115100 | -4.18609300 | 6.02647500  |
| H | -0.76489400 | -2.84972300 | 7.00928000  |
| H | -2.37557400 | -3.52561400 | 7.31723900  |
| C | -1.19025900 | 0.75020100  | 3.50167700  |
| H | -1.15839900 | 0.70331100  | 2.41066100  |
| H | -1.60862200 | 1.71890400  | 3.79603900  |
| H | -0.16237700 | 0.69690200  | 3.86584400  |
| C | -5.61557500 | -1.64089400 | 3.84982500  |
| H | -6.11796300 | -0.67146400 | 3.93111600  |
| H | -5.69644300 | -1.98091000 | 2.81394000  |
| H | -6.13673700 | -2.34976600 | 4.49481600  |
| C | -4.76206400 | -1.71778400 | -1.74633800 |
| C | -3.98690500 | -0.80137700 | -0.79788700 |
| H | -4.61770600 | -1.29583800 | -2.74634300 |
| C | -4.00471300 | -0.90507000 | 0.60586500  |
| O | -3.86349000 | -1.93041800 | 1.29462600  |
| C | -4.52824300 | -3.21876800 | -1.86857400 |
| C | -4.63044900 | -3.78589400 | -3.14599900 |
| C | -4.30019600 | -4.07544100 | -0.78649500 |
| C | -4.49783400 | -5.15725300 | -3.34419300 |
| H | -4.80343100 | -3.13674600 | -4.00133700 |
| C | -4.15947800 | -5.44914200 | -0.98349300 |
| H | -4.21834000 | -3.65818500 | 0.21026200  |
| C | -4.25570700 | -5.99801100 | -2.25917700 |
| H | -4.57636000 | -5.56755900 | -4.34643400 |
| H | -3.97682400 | -6.09317000 | -0.12771600 |
| H | -4.14462300 | -7.06761900 | -2.40820000 |
| H | -3.94150500 | 0.21407300  | -1.18419100 |
| H | -5.83234900 | -1.58331300 | -1.52970900 |
| C | 2.10979400  | 6.47659500  | 0.83045800  |
| F | 2.94088100  | 6.83159400  | -0.15984800 |

|           |             |             |             |
|-----------|-------------|-------------|-------------|
| F         | 2.79421800  | 6.61379500  | 1.98016000  |
| F         | 1.11634600  | 7.37959500  | 0.86651600  |
| TS4CCF-SS |             |             |             |
| C         | 6.14451700  | -1.74834300 | -1.37619200 |
| C         | 5.17035600  | -0.91459000 | -0.81856900 |
| C         | 4.79331000  | -1.02148700 | 0.51392100  |
| C         | 5.45350500  | -1.98427400 | 1.27251900  |
| C         | 6.44804900  | -2.80444500 | 0.74985300  |
| C         | 6.79501300  | -2.69210400 | -0.59425900 |
| C         | 6.33288700  | -1.45035900 | -2.84371900 |
| C         | 5.77400800  | -0.03485500 | -2.95946400 |
| C         | 4.62439400  | -0.02447200 | -1.92104500 |
| H         | 4.03053900  | -0.39942100 | 0.97497300  |
| H         | 6.93665100  | -3.53072400 | 1.38938600  |
| H         | 7.55837300  | -3.33553200 | -1.01927800 |
| H         | 7.37313400  | -1.48736900 | -3.17370600 |
| H         | 5.42989000  | 0.24353300  | -3.96396100 |
| H         | 3.71368200  | -0.45424400 | -2.35377300 |
| H         | 5.74913000  | -2.14375500 | -3.45925100 |
| Br        | 4.94337100  | -2.24395400 | 3.07815100  |
| O         | 6.80778500  | 0.83203800  | -2.52356100 |
| C         | 6.46177600  | 2.19549900  | -2.53289700 |
| H         | 7.25815400  | 2.74456200  | -2.03523300 |
| H         | 6.33568300  | 2.56436000  | -3.56093800 |
| N         | 4.32297300  | 1.36394900  | -1.57109500 |
| C         | 3.22170600  | 1.87770600  | -1.01412500 |
| C         | 5.17883700  | 2.40773100  | -1.79337400 |
| N         | 4.64705500  | 3.53422800  | -1.41460500 |
| N         | 3.42706600  | 3.18171800  | -0.92435500 |
| C         | 2.48652800  | 4.20273900  | -0.54089500 |
| C         | 2.66778700  | 4.87958000  | 0.66547700  |
| C         | 1.47523300  | 4.51538200  | -1.45683700 |
| C         | 1.75365300  | 5.89390700  | 0.96355400  |
| C         | 0.60539000  | 5.54617100  | -1.11699000 |
| C         | 0.72529000  | 6.24226000  | 0.08975200  |
| H         | 1.86792400  | 6.43547700  | 1.89958200  |
| H         | -0.17096000 | 5.82281400  | -1.82522800 |
| C         | -0.23711800 | 7.34956900  | 0.43654900  |
| H         | -0.62729500 | 7.82972900  | -0.46473100 |
| H         | -1.09112900 | 6.96309000  | 1.00418900  |
| H         | 0.24487300  | 8.11269900  | 1.05144200  |
| C         | 1.33254100  | 3.77640900  | -2.75952500 |
| H         | 2.29579500  | 3.66954100  | -3.26806200 |

|   |             |             |             |
|---|-------------|-------------|-------------|
| H | 0.92050900  | 2.77956500  | -2.57687100 |
| H | 0.65168000  | 4.31100400  | -3.42404500 |
| C | 3.80581500  | 4.57856400  | 1.60254900  |
| H | 4.26306300  | 3.60563600  | 1.42267100  |
| H | 4.59183700  | 5.33269900  | 1.49019900  |
| H | 3.45691200  | 4.62025200  | 2.63823000  |
| H | 2.29618300  | 1.36749300  | -0.75279800 |
| B | 6.51750200  | 1.92245500  | 1.33190200  |
| F | 5.15436000  | 1.76270000  | 0.96773400  |
| F | 6.61056000  | 2.97472600  | 2.24309500  |
| F | 7.24665100  | 2.22167700  | 0.17061100  |
| F | 6.98243800  | 0.73662600  | 1.89435200  |
| N | 2.42279800  | 0.12700800  | 3.08958100  |
| C | 1.21788100  | -0.62497800 | 3.43474800  |
| C | 1.45699800  | -2.12383400 | 3.56439700  |
| H | 0.48196600  | -0.46913100 | 2.64132800  |
| H | 0.75814100  | -0.23732600 | 4.36372000  |
| H | 0.53000400  | -2.62853700 | 3.85541500  |
| H | 1.78032600  | -2.52476200 | 2.59972400  |
| H | 2.22651400  | -2.35625500 | 4.30591600  |
| C | 3.16645900  | 0.50588800  | 4.28555300  |
| C | 4.48137600  | 1.21388800  | 3.99384600  |
| H | 3.37810300  | -0.41922900 | 4.83681600  |
| H | 2.54720900  | 1.12924900  | 4.96076200  |
| H | 5.03316600  | 1.35782000  | 4.92788900  |
| H | 5.10143900  | 0.62993400  | 3.31023400  |
| H | 4.33594100  | 2.19889500  | 3.54194500  |
| C | 2.14471800  | 1.23167700  | 2.17519000  |
| C | 1.20157200  | 2.32258900  | 2.69007000  |
| H | 1.70604300  | 0.78333400  | 1.27755400  |
| H | 3.10073100  | 1.67151700  | 1.87218400  |
| H | 1.02017400  | 3.05920200  | 1.90061800  |
| H | 0.23302600  | 1.89893100  | 2.98242100  |
| H | 1.62107000  | 2.84400300  | 3.55721200  |
| C | -1.74096600 | -0.64757600 | 1.13611800  |
| C | -0.66719400 | -0.18728000 | 0.35924700  |
| H | -2.26876900 | 0.15405100  | 1.65345800  |
| C | -0.57437500 | 1.22595500  | 0.07549700  |
| H | -1.38054900 | 1.84085500  | 0.51799500  |
| O | 0.33754200  | 1.77154400  | -0.54653200 |
| C | -1.75638400 | -1.91066700 | 1.91416100  |
| C | -2.22411800 | -1.86069900 | 3.23593900  |
| C | -1.32207300 | -3.14177300 | 1.40446300  |
| C | -2.27608500 | -3.00682600 | 4.02410800  |

|    |             |             |             |
|----|-------------|-------------|-------------|
| H  | -2.52729800 | -0.90305200 | 3.65552900  |
| C  | -1.37421800 | -4.28677600 | 2.19351200  |
| H  | -0.94515900 | -3.20160500 | 0.39036300  |
| C  | -1.85492500 | -4.22732200 | 3.50082000  |
| H  | -2.63600700 | -2.94331000 | 5.04603000  |
| H  | -1.03789400 | -5.23303700 | 1.78247000  |
| H  | -1.89446800 | -5.12485800 | 4.10889700  |
| C  | 0.35988600  | -1.03912800 | -0.13767300 |
| C  | 1.24350600  | -1.76966400 | -0.54471100 |
| C  | 2.20912300  | -2.67922100 | -1.08531800 |
| C  | 2.37559200  | -2.77339400 | -2.47752500 |
| C  | 2.99373100  | -3.48155400 | -0.24242800 |
| C  | 3.32237800  | -3.63534900 | -3.01373100 |
| H  | 1.75439400  | -2.16579000 | -3.12738200 |
| C  | 3.92759300  | -4.35553700 | -0.78149400 |
| H  | 2.91282100  | -3.37436000 | 0.83505900  |
| C  | 4.09656100  | -4.42179200 | -2.16207900 |
| H  | 3.45294200  | -3.70630900 | -4.08893200 |
| H  | 4.54255600  | -4.96570600 | -0.12969600 |
| C  | -7.01718200 | -2.18975300 | 2.57559300  |
| C  | -6.39259900 | -1.47680300 | 1.55011700  |
| C  | -6.74132000 | -1.64984500 | 0.21838500  |
| C  | -7.73238600 | -2.58970500 | -0.05910700 |
| C  | -8.35400600 | -3.32940800 | 0.94228100  |
| C  | -7.99639700 | -3.12547400 | 2.27478900  |
| C  | -6.48250400 | -1.75693700 | 3.92139800  |
| C  | -5.86914700 | -0.39053300 | 3.60808000  |
| C  | -5.34303600 | -0.57455900 | 2.16635800  |
| H  | -6.27221600 | -1.08910700 | -0.58580500 |
| H  | -9.12135500 | -4.04884800 | 0.68139100  |
| H  | -8.49385800 | -3.68415900 | 3.06071500  |
| H  | -7.24915500 | -1.66998700 | 4.69364700  |
| H  | -5.07942000 | -0.07874500 | 4.30346300  |
| H  | -4.36729300 | -1.06668300 | 2.20372100  |
| H  | -5.70471800 | -2.44165100 | 4.27772100  |
| Br | -8.25792900 | -2.86470200 | -1.85858500 |
| O  | -6.93085800 | 0.54901600  | 3.60416200  |
| C  | -6.50603000 | 1.85542600  | 3.30062800  |
| H  | -7.38956300 | 2.48883000  | 3.21785200  |
| H  | -5.85558100 | 2.25669200  | 4.09022200  |
| N  | -5.16886800 | 0.72748800  | 1.51551400  |
| C  | -4.47154200 | 1.07848500  | 0.40577800  |
| C  | -5.74831200 | 1.86680200  | 2.00629100  |
| N  | -5.46777200 | 2.89257800  | 1.25846100  |

|   |             |             |             |
|---|-------------|-------------|-------------|
| N | -4.67649400 | 2.39112700  | 0.27186400  |
| C | -4.21824900 | 3.30162900  | -0.74774200 |
| C | -3.31940600 | 4.29436600  | -0.36919800 |
| C | -4.75119700 | 3.18803400  | -2.03759300 |
| C | -2.96543500 | 5.23097900  | -1.34252400 |
| C | -4.34996800 | 4.13795100  | -2.97011900 |
| C | -3.46126300 | 5.16760600  | -2.64071400 |
| H | -2.28254500 | 6.02952200  | -1.06514700 |
| H | -4.74280500 | 4.07574600  | -3.98183600 |
| C | -3.02822100 | 6.16661200  | -3.68157600 |
| H | -2.28846200 | 5.72168500  | -4.35499000 |
| H | -3.87328600 | 6.49231200  | -4.29304600 |
| H | -2.57514800 | 7.04692200  | -3.21997400 |
| C | -5.68185600 | 2.06689700  | -2.41624000 |
| H | -5.11304700 | 1.14248900  | -2.57489800 |
| H | -6.43176300 | 1.87778700  | -1.64149800 |
| H | -6.20518300 | 2.30464600  | -3.34359500 |
| C | -2.71852500 | 4.38445500  | 1.01013400  |
| H | -2.85203400 | 3.46701000  | 1.58730400  |
| H | -1.64396900 | 4.57743600  | 0.92712400  |
| H | -3.16950500 | 5.20213200  | 1.58072800  |
| C | -2.73848500 | -1.86396700 | -1.39829900 |
| C | -3.38233000 | -1.09186500 | -0.26970400 |
| H | -2.69664100 | -2.92439400 | -1.13211700 |
| C | -3.56400100 | 0.28163500  | -0.49997300 |
| O | -2.89003800 | 0.94679200  | -1.30612100 |
| C | -3.51161700 | -1.68406200 | -2.69157700 |
| C | -4.76549200 | -2.27830300 | -2.86734600 |
| C | -3.00715000 | -0.87113100 | -3.70948800 |
| C | -5.49286000 | -2.07028300 | -4.03708400 |
| H | -5.17997600 | -2.90861600 | -2.08170200 |
| C | -3.73163800 | -0.66211000 | -4.88099000 |
| H | -2.04679200 | -0.38573100 | -3.56531300 |
| C | -4.97722000 | -1.26223900 | -5.04877700 |
| H | -6.46400400 | -2.53922800 | -4.15558100 |
| H | -3.32423700 | -0.02518900 | -5.66015200 |
| H | -5.54428100 | -1.10086700 | -5.96001800 |
| H | -4.08372400 | -1.64217000 | 0.34326700  |
| H | -1.71302000 | -1.50966800 | -1.54888400 |
| C | 5.17236800  | -5.28545000 | -2.74756500 |
| F | 4.78505400  | -5.85716100 | -3.89837800 |
| F | 6.28138200  | -4.57190300 | -3.03542300 |
| F | 5.54963900  | -6.26435300 | -1.91506300 |



TS4CCF-RR

|    |             |             |             |
|----|-------------|-------------|-------------|
| C  | 0.14574300  | -4.65887500 | 0.78667000  |
| C  | -0.53451500 | -3.44758200 | 0.65920900  |
| C  | -0.53077900 | -2.73230900 | -0.53306300 |
| C  | 0.18972500  | -3.27385900 | -1.59308300 |
| C  | 0.84997300  | -4.49831500 | -1.49906400 |
| C  | 0.83068700  | -5.19739700 | -0.29588500 |
| C  | 0.03720900  | -5.20501400 | 2.18864800  |
| C  | -1.07481500 | -4.36591400 | 2.82829500  |
| C  | -1.08774000 | -3.04755500 | 2.00837300  |
| H  | -1.06335800 | -1.79546200 | -0.67822200 |
| H  | 1.37650100  | -4.89389700 | -2.36134800 |
| H  | 1.34464800  | -6.14951400 | -0.21125300 |
| H  | -0.23456200 | -6.26264900 | 2.22448800  |
| H  | -0.91163900 | -4.16851100 | 3.89655300  |
| H  | -0.43943100 | -2.29014000 | 2.46058200  |
| H  | 0.98069100  | -5.08671700 | 2.73259900  |
| Br | 0.32159000  | -2.28898900 | -3.19868600 |
| O  | -2.28534300 | -5.07644100 | 2.65565100  |
| C  | -3.38631600 | -4.41059600 | 3.23057800  |
| H  | -4.27708000 | -5.00127700 | 3.03285200  |
| H  | -3.24470100 | -4.27913800 | 4.31308100  |
| N  | -2.43675500 | -2.47729700 | 2.00759500  |
| C  | -2.86254400 | -1.32513800 | 1.48315200  |
| C  | -3.52967600 | -3.07585800 | 2.57279500  |
| N  | -4.58544300 | -2.32295800 | 2.46313400  |
| N  | -4.14844900 | -1.23493700 | 1.77270400  |
| C  | -5.02108600 | -0.12638600 | 1.50826800  |
| C  | -6.19908200 | -0.37350100 | 0.79353900  |
| C  | -4.67260700 | 1.12982300  | 2.01696700  |
| C  | -7.05107700 | 0.71001700  | 0.59219400  |
| C  | -5.56491100 | 2.17587700  | 1.77858500  |
| C  | -6.75128400 | 1.98663300  | 1.07243300  |
| H  | -7.96980800 | 0.55182100  | 0.03205700  |
| H  | -5.32613500 | 3.16275300  | 2.16477500  |
| C  | -7.69473500 | 3.13244200  | 0.82157500  |
| H  | -8.70943100 | 2.87954600  | 1.14157100  |
| H  | -7.37770300 | 4.03132900  | 1.35376200  |
| H  | -7.73840600 | 3.37258900  | -0.24510800 |
| C  | -3.41392600 | 1.36264300  | 2.81539600  |
| H  | -3.28212900 | 0.59329300  | 3.58350600  |
| H  | -2.51242400 | 1.35600100  | 2.19163600  |
| H  | -3.46764400 | 2.33329500  | 3.31163200  |
| C  | -6.52092100 | -1.73354500 | 0.23616500  |

|   |             |             |             |
|---|-------------|-------------|-------------|
| H | -5.64382100 | -2.21183900 | -0.20584400 |
| H | -6.88159100 | -2.40532700 | 1.02066800  |
| H | -7.29644900 | -1.64851500 | -0.52767600 |
| H | -2.26124800 | -0.58014300 | 0.97920200  |
| B | -4.34012900 | -4.57795500 | -0.40673100 |
| F | -3.67078900 | -3.34257300 | -0.22391500 |
| F | -5.49246500 | -4.35405500 | -1.17008100 |
| F | -4.70749900 | -5.07801100 | 0.85220400  |
| F | -3.49086900 | -5.46927700 | -1.05190100 |
| N | -2.67047900 | -0.77651600 | -2.91700600 |
| C | -2.00269900 | 0.39640000  | -3.46508700 |
| C | -2.70535500 | 1.19965900  | -4.56955000 |
| H | -1.03335400 | 0.06030200  | -3.85851200 |
| H | -1.76761200 | 1.05885000  | -2.62524700 |
| H | -2.00172900 | 1.92821000  | -4.98404200 |
| H | -3.03392600 | 0.55316900  | -5.38872300 |
| H | -3.57564500 | 1.75320300  | -4.20707100 |
| C | -3.01892500 | -1.76273700 | -3.93086200 |
| C | -3.30117900 | -3.13503400 | -3.33730800 |
| H | -2.16021600 | -1.83440100 | -4.60967400 |
| H | -3.87748500 | -1.44427300 | -4.54937400 |
| H | -3.45281200 | -3.86435300 | -4.13895100 |
| H | -2.45988600 | -3.46212800 | -2.72101200 |
| H | -4.19023100 | -3.14541500 | -2.70292400 |
| C | -3.72486800 | -0.50993600 | -1.94261500 |
| C | -5.10287300 | -0.13031600 | -2.50321100 |
| H | -3.35647900 | 0.28939800  | -1.28364300 |
| H | -3.83657800 | -1.40337800 | -1.31562900 |
| H | -5.75698900 | 0.20661500  | -1.69490100 |
| H | -5.04162600 | 0.67403300  | -3.24085600 |
| H | -5.58036300 | -0.98952600 | -2.98514100 |
| C | 1.48713000  | 0.69539600  | -1.09653600 |
| C | 0.42681700  | 0.77257100  | -0.16685200 |
| H | 2.07988300  | -0.21335200 | -0.98724300 |
| C | 0.50517600  | -0.05971400 | 1.00493200  |
| H | 1.42259400  | -0.68004800 | 1.06031400  |
| O | -0.35604800 | -0.17145700 | 1.88265300  |
| C | 1.44690200  | 1.15294400  | -2.50811100 |
| C | 2.23680500  | 0.46762100  | -3.44274800 |
| C | 0.66878200  | 2.22843200  | -2.95915800 |
| C | 2.23567100  | 0.82667600  | -4.78570900 |
| H | 2.83084400  | -0.38090500 | -3.11516100 |
| C | 0.68013300  | 2.59808000  | -4.30126600 |
| H | 0.05038300  | 2.77938600  | -2.26048000 |

|    |             |             |             |
|----|-------------|-------------|-------------|
| C  | 1.45491600  | 1.89581600  | -5.22149900 |
| H  | 2.84267400  | 0.26891200  | -5.49152700 |
| H  | 0.07483800  | 3.43792000  | -4.62793500 |
| H  | 1.45327400  | 2.18130200  | -6.26842200 |
| C  | -0.69134400 | 1.64824700  | -0.22605200 |
| C  | -1.68566900 | 2.35044400  | -0.20065300 |
| C  | -2.80860000 | 3.24099200  | -0.20066600 |
| C  | -3.80239100 | 3.14060500  | -1.18571100 |
| C  | -2.90779400 | 4.24618200  | 0.77644000  |
| C  | -4.86687900 | 4.03330700  | -1.20416100 |
| H  | -3.72930800 | 2.36286300  | -1.93870500 |
| C  | -3.96724000 | 5.14101000  | 0.75342900  |
| H  | -2.13959500 | 4.32057400  | 1.53856100  |
| C  | -4.94276200 | 5.03326000  | -0.23851600 |
| H  | -5.63219500 | 3.95477800  | -1.96888900 |
| H  | -4.03972500 | 5.92267800  | 1.50304100  |
| C  | 7.21089800  | 0.12529500  | -1.74712300 |
| C  | 6.05516300  | 0.27692300  | -0.98521100 |
| C  | 4.99903500  | -0.60790100 | -1.07160500 |
| C  | 5.10050600  | -1.65523200 | -1.97766900 |
| C  | 6.21995300  | -1.80963700 | -2.78912300 |
| C  | 7.28779000  | -0.91309400 | -2.66814100 |
| C  | 8.23558900  | 1.15385000  | -1.31709400 |
| C  | 7.76294400  | 1.51790900  | 0.10039800  |
| C  | 6.21911400  | 1.42321100  | -0.01534900 |
| H  | 4.12003500  | -0.52038000 | -0.44362700 |
| H  | 6.27357600  | -2.63510000 | -3.48949700 |
| H  | 8.17786700  | -1.05648000 | -3.27199200 |
| H  | 9.25774900  | 0.77176500  | -1.29040000 |
| H  | 8.09655700  | 2.50144200  | 0.45121500  |
| H  | 5.79910500  | 2.36849000  | -0.37587700 |
| H  | 8.21317100  | 2.03865800  | -1.96180900 |
| Br | 3.63868600  | -2.85672500 | -2.02926200 |
| O  | 8.24949600  | 0.49198100  | 0.95162000  |
| C  | 7.80177900  | 0.60741100  | 2.28307400  |
| H  | 8.20685400  | -0.22923100 | 2.85173000  |
| H  | 8.14094400  | 1.54834700  | 2.73771300  |
| N  | 5.59291700  | 1.09587400  | 1.26847000  |
| C  | 4.27737500  | 0.96496100  | 1.56839300  |
| C  | 6.30511900  | 0.56244000  | 2.30695200  |
| N  | 5.51143900  | 0.09980800  | 3.22867700  |
| N  | 4.26009000  | 0.35436200  | 2.75737500  |
| C  | 3.12493300  | -0.18768000 | 3.46236400  |
| C  | 2.50802000  | 0.59630000  | 4.43795200  |

|           |             |             |             |
|-----------|-------------|-------------|-------------|
| C         | 2.75100500  | -1.50073200 | 3.16704500  |
| C         | 1.41551000  | 0.04034700  | 5.09741100  |
| C         | 1.67336300  | -2.01816400 | 3.88510600  |
| C         | 0.97730400  | -1.25617300 | 4.82355700  |
| H         | 0.89719800  | 0.63327200  | 5.84599900  |
| H         | 1.37747400  | -3.04995100 | 3.70751200  |
| C         | -0.23827000 | -1.81795900 | 5.51126500  |
| H         | -0.47044300 | -1.26737400 | 6.42475500  |
| H         | -1.11218000 | -1.74331900 | 4.85179700  |
| H         | -0.10017700 | -2.87147400 | 5.76911100  |
| C         | 3.45757900  | -2.33584700 | 2.12691000  |
| H         | 3.05910600  | -2.16549800 | 1.11779300  |
| H         | 4.53219900  | -2.13670600 | 2.10066400  |
| H         | 3.31782700  | -3.39711700 | 2.34256400  |
| C         | 3.01074800  | 1.97836800  | 4.74836900  |
| H         | 4.06690600  | 1.95422900  | 5.03421500  |
| H         | 2.90985200  | 2.61532400  | 3.86488300  |
| H         | 2.44244300  | 2.41724600  | 5.56949000  |
| C         | 2.44643500  | 3.39588900  | -0.68446200 |
| C         | 3.04838100  | 2.02626700  | -0.42061300 |
| H         | 1.43159100  | 3.43321600  | -0.27374400 |
| C         | 3.08534200  | 1.66804200  | 0.94590500  |
| O         | 2.17242600  | 1.93203400  | 1.74624900  |
| C         | 3.31085200  | 4.45824100  | -0.04045200 |
| C         | 4.46398700  | 4.91592800  | -0.68727800 |
| C         | 3.01970400  | 4.94477200  | 1.23759400  |
| C         | 5.31305600  | 5.83145000  | -0.07009500 |
| H         | 4.69194500  | 4.55155200  | -1.68718400 |
| C         | 3.86688600  | 5.86218300  | 1.85651300  |
| H         | 2.12856000  | 4.58778600  | 1.74546600  |
| C         | 5.01692000  | 6.30605400  | 1.20693700  |
| H         | 6.20083900  | 6.18054500  | -0.58844600 |
| H         | 3.62628200  | 6.23294300  | 2.84820200  |
| H         | 5.67474500  | 7.02195200  | 1.68903100  |
| H         | 3.87570700  | 1.74749300  | -1.06587200 |
| H         | 2.38806400  | 3.57052600  | -1.76047700 |
| C         | -6.03640100 | 6.05828200  | -0.28243200 |
| F         | -7.05762600 | 5.68468200  | -1.06697100 |
| F         | -5.59374500 | 7.23769000  | -0.74966100 |
| F         | -6.53851000 | 6.30212300  | 0.94243100  |
| TS4CCF-SR |             |             |             |
| C         | 0.66981500  | -4.99424200 | 0.48054000  |
| C         | 1.21759400  | -3.73373500 | 0.23711200  |

|    |             |             |             |
|----|-------------|-------------|-------------|
| C  | 1.57363000  | -2.87346700 | 1.26863800  |
| C  | 1.36891100  | -3.33235700 | 2.56667700  |
| C  | 0.81197600  | -4.57925300 | 2.83684000  |
| C  | 0.45687700  | -5.42041400 | 1.78437100  |
| C  | 0.39430200  | -5.72059700 | -0.81594800 |
| C  | 1.25803600  | -4.96530300 | -1.83202700 |
| C  | 1.29877600  | -3.52819100 | -1.25993300 |
| H  | 2.04795000  | -1.90868700 | 1.11060300  |
| H  | 0.67795300  | -4.89527200 | 3.86488000  |
| H  | 0.03838200  | -6.40051100 | 1.98937900  |
| H  | 0.66783900  | -6.77763100 | -0.79516400 |
| H  | 0.85934500  | -4.98152000 | -2.85556100 |
| H  | 0.44810700  | -2.96238700 | -1.64609800 |
| H  | -0.66490000 | -5.64565600 | -1.08969800 |
| Br | 1.90659200  | -2.24827900 | 4.02447000  |
| O  | 2.54753700  | -5.54328700 | -1.80327700 |
| C  | 3.46133000  | -4.91892400 | -2.67481800 |
| H  | 4.43708700  | -5.37075500 | -2.51084000 |
| H  | 3.15668200  | -5.04735600 | -3.72331200 |
| N  | 2.50019900  | -2.84063200 | -1.72544600 |
| C  | 2.83163900  | -1.55448100 | -1.60225500 |
| C  | 3.54110700  | -3.45627700 | -2.36173900 |
| N  | 4.46787900  | -2.59590400 | -2.67587100 |
| N  | 4.00816900  | -1.41155600 | -2.18703200 |
| C  | 4.73632300  | -0.18812600 | -2.37868000 |
| C  | 6.06203300  | -0.12059800 | -1.93352300 |
| C  | 4.08834500  | 0.86923200  | -3.03089900 |
| C  | 6.74179300  | 1.07717300  | -2.15529900 |
| C  | 4.82119000  | 2.04026100  | -3.22045800 |
| C  | 6.13922300  | 2.16850100  | -2.78074200 |
| H  | 7.76688300  | 1.16275800  | -1.80426800 |
| H  | 4.35100800  | 2.87154800  | -3.74136200 |
| C  | 6.87018300  | 3.47593800  | -2.93161400 |
| H  | 7.95071500  | 3.32547300  | -2.97483300 |
| H  | 6.55497100  | 4.00415600  | -3.83490700 |
| H  | 6.65866800  | 4.12744200  | -2.07639600 |
| C  | 2.66750000  | 0.77019800  | -3.53103100 |
| H  | 2.48198100  | -0.18096900 | -4.03901000 |
| H  | 1.93179200  | 0.84913400  | -2.72076300 |
| H  | 2.46957400  | 1.57610700  | -4.24120200 |
| C  | 6.73391000  | -1.26404400 | -1.22271600 |
| H  | 6.05489100  | -1.77334000 | -0.53557700 |
| H  | 7.08725300  | -2.01121700 | -1.93967900 |
| H  | 7.59562300  | -0.89448600 | -0.66323300 |

|   |             |             |             |
|---|-------------|-------------|-------------|
| H | 2.24406500  | -0.77417200 | -1.13883000 |
| B | 4.91762800  | -3.90126000 | 0.75475300  |
| F | 4.31716000  | -2.69193100 | 0.31477600  |
| F | 6.26459200  | -3.65570300 | 1.02941900  |
| F | 4.81036400  | -4.84403800 | -0.27872000 |
| F | 4.25468900  | -4.35580900 | 1.89122500  |
| N | 3.53813600  | 0.25772400  | 2.41858800  |
| C | 2.58759400  | 1.18625900  | 3.02024300  |
| C | 3.14408000  | 2.39984100  | 3.77820200  |
| H | 1.96494300  | 0.61084200  | 3.72134600  |
| H | 1.91452100  | 1.52618700  | 2.22687300  |
| H | 2.30805900  | 2.99361300  | 4.16452700  |
| H | 3.74931400  | 2.09218000  | 4.63583900  |
| H | 3.75797400  | 3.04773900  | 3.14685600  |
| C | 4.60555800  | -0.12401700 | 3.33207000  |
| C | 5.34171900  | -1.38468100 | 2.90739700  |
| H | 4.13077900  | -0.30809800 | 4.30577600  |
| H | 5.32860900  | 0.69623400  | 3.49593200  |
| H | 6.09819700  | -1.63988200 | 3.65608700  |
| H | 4.64496300  | -2.21984600 | 2.81027800  |
| H | 5.85227700  | -1.27099600 | 1.94812000  |
| C | 3.95412100  | 0.56178300  | 1.05483500  |
| C | 4.90279700  | 1.74723400  | 0.84322200  |
| H | 3.03741700  | 0.74848500  | 0.47972000  |
| H | 4.40503500  | -0.34767900 | 0.63652800  |
| H | 5.08569000  | 1.88555600  | -0.22699200 |
| H | 4.47351100  | 2.67806900  | 1.22367800  |
| H | 5.86924100  | 1.58371800  | 1.33250200  |
| C | -1.14840300 | -0.18514700 | 1.42437000  |
| C | -0.42168500 | 0.07983900  | 0.25123900  |
| H | -1.50127300 | -1.21370000 | 1.52407200  |
| C | -0.50679700 | -0.87716100 | -0.81562600 |
| H | -1.09062900 | -1.78884300 | -0.56415000 |
| O | -0.00589500 | -0.75859300 | -1.94084700 |
| C | -0.95826100 | 0.53828000  | 2.69110700  |
| C | -0.84853500 | -0.21772100 | 3.86305900  |
| C | -0.87591900 | 1.93717100  | 2.77225700  |
| C | -0.59983800 | 0.40254700  | 5.08501000  |
| H | -0.90420400 | -1.30070500 | 3.80555800  |
| C | -0.65183200 | 2.55507700  | 3.99522300  |
| H | -0.99765000 | 2.54154000  | 1.87838400  |
| C | -0.50107700 | 1.78842200  | 5.15385500  |
| H | -0.48685700 | -0.20089100 | 5.97978300  |
| H | -0.59716800 | 3.63795100  | 4.04948600  |

|    |             |             |             |
|----|-------------|-------------|-------------|
| H  | -0.31435300 | 2.27520000  | 6.10549500  |
| C  | 0.35499500  | 1.24762800  | 0.04481900  |
| C  | 1.01226800  | 2.25862300  | -0.11591100 |
| C  | 1.88990900  | 3.38382800  | -0.14676600 |
| C  | 2.61541400  | 3.69439500  | -1.30553900 |
| C  | 2.07659100  | 4.14990500  | 1.01607600  |
| C  | 3.54555800  | 4.72287700  | -1.29090000 |
| H  | 2.45470800  | 3.10919400  | -2.20355400 |
| C  | 3.00189900  | 5.18425100  | 1.02517100  |
| H  | 1.51404900  | 3.90325900  | 1.91170700  |
| C  | 3.74315000  | 5.45814000  | -0.12364300 |
| H  | 4.12695400  | 4.94776200  | -2.17986600 |
| H  | 3.16546400  | 5.76257700  | 1.92814200  |
| C  | -3.28730800 | 4.41095600  | -1.13444300 |
| C  | -3.69599100 | 3.09321200  | -0.91763200 |
| C  | -4.98066300 | 2.78275700  | -0.49568300 |
| C  | -5.84843100 | 3.84827700  | -0.26617800 |
| C  | -5.46109600 | 5.17132900  | -0.45499200 |
| C  | -4.16908700 | 5.45652200  | -0.89837600 |
| C  | -1.86085100 | 4.44556500  | -1.63781100 |
| C  | -1.65236400 | 3.01896600  | -2.15047200 |
| C  | -2.51870600 | 2.17888400  | -1.18285400 |
| H  | -5.31082000 | 1.75981900  | -0.33579300 |
| H  | -6.16793400 | 5.97107800  | -0.26737000 |
| H  | -3.87022900 | 6.48620500  | -1.06538700 |
| H  | -1.69292000 | 5.17294300  | -2.43448100 |
| H  | -0.60850900 | 2.68307600  | -2.15863200 |
| H  | -1.95594000 | 1.98471900  | -0.26762000 |
| H  | -1.15496700 | 4.65411400  | -0.82504800 |
| Br | -7.61097300 | 3.47673200  | 0.32388700  |
| O  | -2.20678800 | 2.95915600  | -3.45553100 |
| C  | -2.08954300 | 1.67808100  | -4.02551800 |
| H  | -2.58402000 | 1.68730900  | -4.99691600 |
| H  | -1.03515500 | 1.39631100  | -4.16018300 |
| N  | -2.85245300 | 0.88653900  | -1.78658600 |
| C  | -3.35385000 | -0.24498600 | -1.23718800 |
| C  | -2.73349200 | 0.66305200  | -3.13160100 |
| N  | -3.17417000 | -0.51858300 | -3.45021700 |
| N  | -3.55385900 | -1.07086400 | -2.26979900 |
| C  | -4.18186900 | -2.36684700 | -2.27683700 |
| C  | -3.44435000 | -3.44705800 | -2.75975600 |
| C  | -5.50661000 | -2.47037700 | -1.83507300 |
| C  | -4.07365400 | -4.69305700 | -2.76721900 |
| C  | -6.08387900 | -3.73592300 | -1.86939300 |

|      |             |             |             |
|------|-------------|-------------|-------------|
| C    | -5.38348500 | -4.85755600 | -2.32175100 |
| H    | -3.51942500 | -5.55478700 | -3.13090600 |
| H    | -7.11099500 | -3.84921600 | -1.53141700 |
| C    | -6.03291500 | -6.21653800 | -2.30771000 |
| H    | -5.50201400 | -6.91653100 | -2.95573400 |
| H    | -6.03323600 | -6.63070800 | -1.29456400 |
| H    | -7.07293200 | -6.15812700 | -2.63785800 |
| C    | -6.28720300 | -1.28695600 | -1.32513100 |
| H    | -6.02688800 | -1.06458500 | -0.28254500 |
| H    | -6.10889100 | -0.38985000 | -1.92709000 |
| H    | -7.35644100 | -1.50341200 | -1.35348500 |
| C    | -2.03633600 | -3.30087600 | -3.27651800 |
| H    | -2.04335000 | -3.05288700 | -4.34237500 |
| H    | -1.47976000 | -2.50489300 | -2.77385300 |
| H    | -1.49808400 | -4.24446900 | -3.15815600 |
| C    | -3.94863100 | -0.15806900 | 2.57485500  |
| C    | -3.42183000 | 0.26864200  | 1.22542200  |
| H    | -3.78894400 | 0.64445800  | 3.30165400  |
| C    | -3.50058700 | -0.68273600 | 0.20327400  |
| O    | -3.55312400 | -1.91716700 | 0.36772400  |
| C    | -5.42209500 | -0.49466900 | 2.44644800  |
| C    | -5.85072500 | -1.82366000 | 2.45190500  |
| C    | -6.36377500 | 0.51414900  | 2.20975100  |
| C    | -7.19110900 | -2.14093200 | 2.23428900  |
| H    | -5.12017800 | -2.61186700 | 2.60557600  |
| C    | -7.70162500 | 0.19996000  | 1.98857900  |
| H    | -6.04539200 | 1.55543900  | 2.18451500  |
| C    | -8.12024100 | -1.13064000 | 2.00173900  |
| H    | -7.50560400 | -3.18010000 | 2.23838700  |
| H    | -8.41512400 | 0.99568500  | 1.79979900  |
| H    | -9.16310200 | -1.37578500 | 1.82759700  |
| H    | -3.45793100 | 1.32620000  | 0.99847700  |
| H    | -3.40764300 | -1.04073700 | 2.93557700  |
| C    | 4.72870000  | 6.58851300  | -0.12737100 |
| F    | 5.21741600  | 6.83406200  | 1.09581700  |
| F    | 5.77174200  | 6.33578300  | -0.93688600 |
| F    | 4.17513000  | 7.73331600  | -0.56327300 |
| R2Cl |             |             |             |
| C    | -3.24643000 | 1.17519500  | -0.00536300 |
| C    | -2.07112900 | 1.85263900  | -0.00936400 |
| H    | -4.13789200 | 1.80174900  | -0.03675500 |
| C    | -2.15884200 | 3.33637600  | -0.03754900 |
| H    | -3.19456200 | 3.72871300  | -0.05166000 |



|    |             |             |             |
|----|-------------|-------------|-------------|
| O  | -1.20323800 | 4.07786900  | -0.04438000 |
| C  | -3.52549700 | -0.25584900 | 0.02396100  |
| C  | -4.86578100 | -0.65364700 | -0.11921800 |
| C  | -2.54376200 | -1.24724200 | 0.19410800  |
| C  | -5.21755500 | -1.99701200 | -0.10862000 |
| H  | -5.63277100 | 0.10579200  | -0.24314000 |
| C  | -2.89993700 | -2.58965500 | 0.20918800  |
| H  | -1.50704700 | -0.96405700 | 0.32397600  |
| C  | -4.23304800 | -2.96970600 | 0.05472000  |
| H  | -6.25682000 | -2.28532300 | -0.22447100 |
| H  | -2.13322200 | -3.34534300 | 0.34455400  |
| H  | -4.50316500 | -4.02054400 | 0.06606100  |
| C  | -0.75722100 | 1.30267400  | -0.00445400 |
| C  | 0.39167000  | 0.91519100  | -0.00991600 |
| C  | 1.73621100  | 0.42792800  | -0.01428100 |
| C  | 1.99322500  | -0.93887100 | -0.19735900 |
| C  | 2.80937000  | 1.31289300  | 0.16584100  |
| C  | 3.29709400  | -1.41540800 | -0.19892100 |
| H  | 1.16576100  | -1.62532500 | -0.34189300 |
| C  | 4.11577000  | 0.84288100  | 0.16534700  |
| H  | 2.61153500  | 2.36968400  | 0.30621500  |
| C  | 4.34478600  | -0.51765400 | -0.01675200 |
| H  | 3.50208100  | -2.47021400 | -0.34008100 |
| H  | 4.94914000  | 1.52162600  | 0.30459800  |
| Cl | 5.98525500  | -1.11318300 | -0.01768100 |

TS4CCI-RS

|    |             |             |             |
|----|-------------|-------------|-------------|
| C  | -3.74617700 | -1.31616300 | 3.35553000  |
| C  | -3.43155000 | -0.68139200 | 2.15046800  |
| C  | -3.79396600 | -1.21661000 | 0.92570600  |
| C  | -4.49556500 | -2.41876700 | 0.94882600  |
| C  | -4.81556500 | -3.07798500 | 2.12950800  |
| C  | -4.43567300 | -2.51978300 | 3.35093100  |
| C  | -3.23926800 | -0.50967200 | 4.53020800  |
| C  | -3.02146700 | 0.87475400  | 3.91480900  |
| C  | -2.62001700 | 0.55620500  | 2.45726400  |
| H  | -3.57673700 | -0.73026500 | -0.02056700 |
| H  | -5.36259900 | -4.01305600 | 2.09400500  |
| H  | -4.69111500 | -3.02062600 | 4.27936400  |
| H  | -3.94354900 | -0.45397700 | 5.36294000  |
| H  | -2.26827700 | 1.49065300  | 4.42376900  |
| H  | -1.54197200 | 0.36887200  | 2.37839700  |
| H  | -2.29194900 | -0.91065800 | 4.90892900  |
| Br | -5.00893600 | -3.19424100 | -0.70103000 |

|   |             |             |             |
|---|-------------|-------------|-------------|
| O | -4.28624800 | 1.51700700  | 3.92495300  |
| C | -4.29458100 | 2.81006900  | 3.36831600  |
| H | -5.33592400 | 3.10367000  | 3.24264000  |
| H | -3.78208800 | 3.52789400  | 4.02387500  |
| N | -2.87518300 | 1.73797000  | 1.63734400  |
| C | -2.31623500 | 2.06982100  | 0.47633400  |
| C | -3.61573100 | 2.81447000  | 2.03407500  |
| N | -3.52005200 | 3.79355000  | 1.17678600  |
| N | -2.70359000 | 3.30209500  | 0.20145100  |
| C | -2.13828600 | 4.12894200  | -0.83554800 |
| C | -2.66040700 | 4.08961400  | -2.12777200 |
| C | -1.03302000 | 4.91931800  | -0.47710400 |
| C | -1.96259100 | 4.79708600  | -3.11357400 |
| C | -0.37931800 | 5.60064200  | -1.49795000 |
| C | -0.81494400 | 5.52907400  | -2.82621400 |
| H | -2.33824900 | 4.76655700  | -4.13356900 |
| H | 0.49201100  | 6.20352600  | -1.25478800 |
| C | -0.05074600 | 6.23544400  | -3.91454600 |
| H | 0.24763900  | 7.23818000  | -3.59706200 |
| H | 0.86637700  | 5.68691200  | -4.15401900 |
| H | -0.64604700 | 6.32090100  | -4.82567700 |
| C | -0.61908200 | 5.10278600  | 0.96107200  |
| H | -1.27686400 | 5.83525500  | 1.44018000  |
| H | -0.67331400 | 4.18127900  | 1.54614300  |
| H | 0.40361600  | 5.48354900  | 1.01214900  |
| C | -3.94585400 | 3.39015800  | -2.47904700 |
| H | -4.29420800 | 2.70744200  | -1.70450700 |
| H | -4.72618400 | 4.14118600  | -2.64012200 |
| H | -3.82986500 | 2.83727000  | -3.41494700 |
| H | -1.64848100 | 1.46290700  | -0.11947700 |
| B | -6.00720500 | 1.13333700  | 0.16889800  |
| F | -4.68701400 | 1.22425000  | -0.35422600 |
| F | -6.82391900 | 2.00825300  | -0.54105200 |
| F | -5.96022800 | 1.49892600  | 1.52238200  |
| F | -6.45199300 | -0.18050900 | 0.03408700  |
| N | -2.78876400 | -1.27575500 | -2.67876400 |
| C | -1.74187200 | -2.14764500 | -3.20426600 |
| C | -2.17971300 | -3.60385900 | -3.33709300 |
| H | -0.89448600 | -2.08033900 | -2.51069000 |
| H | -1.36510700 | -1.80098700 | -4.18487900 |
| H | -1.30384100 | -4.25073400 | -3.44612600 |
| H | -2.74353300 | -3.91768900 | -2.45401100 |
| H | -2.81147600 | -3.76160300 | -4.21492700 |
| C | -3.99407100 | -1.32009800 | -3.50565400 |

|   |             |             |             |
|---|-------------|-------------|-------------|
| C | -5.09702400 | -0.38856900 | -3.02487200 |
| H | -4.37391400 | -2.34625600 | -3.46838900 |
| H | -3.75805900 | -1.11191000 | -4.56733400 |
| H | -6.00603600 | -0.57772600 | -3.60320600 |
| H | -5.31568300 | -0.55404300 | -1.96742700 |
| H | -4.83557200 | 0.66585500  | -3.15252200 |
| C | -2.27880700 | 0.07874100  | -2.45129100 |
| C | -1.85785500 | 0.87104900  | -3.69216900 |
| H | -1.40573000 | -0.02630400 | -1.79296000 |
| H | -3.04560100 | 0.63453900  | -1.89784500 |
| H | -1.50636000 | 1.86446200  | -3.39308300 |
| H | -1.03648800 | 0.38294900  | -4.22405600 |
| H | -2.69297800 | 1.00205500  | -4.38919900 |
| C | 1.65245000  | 1.52023100  | -1.22301800 |
| C | 0.87930100  | 1.15293600  | -0.11363600 |
| H | 1.88820400  | 2.58300800  | -1.23655000 |
| C | 0.71747800  | 2.12715200  | 0.93631100  |
| H | 1.18938300  | 3.10307800  | 0.72019600  |
| O | 0.05541500  | 1.96810900  | 1.96631500  |
| C | 1.58603100  | 0.91980800  | -2.57470600 |
| C | 1.63084600  | 1.78384700  | -3.67858000 |
| C | 1.48828700  | -0.45706900 | -2.81049400 |
| C | 1.61171000  | 1.28443800  | -4.97758300 |
| H | 1.67460300  | 2.85598700  | -3.51036900 |
| C | 1.48160400  | -0.95817200 | -4.10798800 |
| H | 1.41085300  | -1.14354600 | -1.97799900 |
| C | 1.55131100  | -0.09059400 | -5.19724700 |
| H | 1.64520900  | 1.97145800  | -5.81727700 |
| H | 1.41636800  | -2.03263300 | -4.25258100 |
| H | 1.54872900  | -0.48301400 | -6.20903700 |
| C | 0.39220400  | -0.16482100 | 0.10491900  |
| C | -0.00307300 | -1.29548800 | 0.32377200  |
| C | -0.34447400 | -2.66363400 | 0.57445500  |
| C | 0.52322800  | -3.46887500 | 1.32631000  |
| C | -1.49472000 | -3.22647300 | 0.00805700  |
| C | 0.25507700  | -4.81991900 | 1.50117900  |
| H | 1.42137600  | -3.03394400 | 1.75451500  |
| C | -1.77928100 | -4.57382600 | 0.19504800  |
| H | -2.15792500 | -2.61093300 | -0.59603600 |
| C | -0.89553800 | -5.35604000 | 0.93065900  |
| H | 0.92708900  | -5.45213200 | 2.07001600  |
| H | -2.68873900 | -5.00082200 | -0.21549300 |
| C | 5.71062800  | -3.34564500 | -1.40335000 |
| C | 4.79019600  | -2.47153200 | -0.81739300 |

|    |            |             |             |
|----|------------|-------------|-------------|
| C  | 3.42409700 | -2.61934300 | -0.99356200 |
| C  | 3.00179300 | -3.65345400 | -1.83241600 |
| C  | 3.90109400 | -4.50151400 | -2.46951100 |
| C  | 5.27080500 | -4.35406200 | -2.24612500 |
| C  | 7.10699500 | -3.04648300 | -0.90548400 |
| C  | 6.81767800 | -2.28179800 | 0.38881000  |
| C  | 5.55729400 | -1.46757600 | 0.01889900  |
| H  | 2.70585100 | -1.97605600 | -0.48876400 |
| H  | 3.53024300 | -5.29105500 | -3.11267800 |
| H  | 5.97201700 | -5.04198200 | -2.70714400 |
| H  | 7.69846800 | -3.94179000 | -0.70534600 |
| H  | 7.64109500 | -1.65325500 | 0.74828600  |
| H  | 5.83322600 | -0.58176000 | -0.56164800 |
| H  | 7.66221600 | -2.41047500 | -1.60332300 |
| Br | 1.14642000 | -3.93183800 | -2.09783500 |
| O  | 6.46003900 | -3.25829700 | 1.35544700  |
| C  | 6.08827200 | -2.72389500 | 2.60143000  |
| H  | 5.65294500 | -3.52983800 | 3.19363600  |
| H  | 6.95790700 | -2.32309700 | 3.14026500  |
| N  | 4.88421400 | -1.00232300 | 1.23315600  |
| C  | 4.10085100 | 0.08590700  | 1.45327800  |
| C  | 5.09884700 | -1.60584700 | 2.44067600  |
| N  | 4.47781400 | -0.97263100 | 3.39201500  |
| N  | 3.86989800 | 0.07471800  | 2.77376200  |
| C  | 3.17822500 | 1.01255100  | 3.63527300  |
| C  | 3.90110700 | 2.10239700  | 4.13119300  |
| C  | 1.88771500 | 0.69564300  | 4.04644500  |
| C  | 3.24472500 | 2.94043700  | 5.02566800  |
| C  | 1.27598600 | 1.56767400  | 4.94855800  |
| C  | 1.92846300 | 2.69738100  | 5.43315800  |
| H  | 3.77651400 | 3.80150400  | 5.42255200  |
| H  | 0.26338800 | 1.34906600  | 5.27773300  |
| C  | 1.23354900 | 3.64898500  | 6.37152100  |
| H  | 0.85473600 | 4.51756600  | 5.82349700  |
| H  | 0.38506400 | 3.17007300  | 6.86454800  |
| H  | 1.91834900 | 4.01820300  | 7.13879400  |
| C  | 1.19924300 | -0.54772600 | 3.56177900  |
| H  | 1.16946700 | -0.57780800 | 2.47035500  |
| H  | 1.71620700 | -1.44451100 | 3.92049200  |
| H  | 0.16914700 | -0.57959900 | 3.92326200  |
| C  | 5.32736600 | 2.34654500  | 3.72245800  |
| H  | 5.93292700 | 1.44254800  | 3.84470500  |
| H  | 5.36920700 | 2.64573400  | 2.67206600  |
| H  | 5.76936800 | 3.13658400  | 4.33126900  |

|    |             |             |             |
|----|-------------|-------------|-------------|
| C  | 4.47405500  | 2.06287100  | -1.84807300 |
| C  | 3.81344500  | 1.10067400  | -0.85785600 |
| H  | 4.40673400  | 1.57229200  | -2.82451800 |
| C  | 3.81896500  | 1.27478700  | 0.53921600  |
| O  | 3.56170100  | 2.31113800  | 1.17586100  |
| C  | 4.03483100  | 3.50757600  | -2.05479900 |
| C  | 4.04880500  | 4.00886500  | -3.36299500 |
| C  | 3.69388700  | 4.38448600  | -1.01929200 |
| C  | 3.71759500  | 5.33316900  | -3.63637000 |
| H  | 4.30815700  | 3.34300400  | -4.18284900 |
| C  | 3.35452700  | 5.70947600  | -1.29115900 |
| H  | 3.67861100  | 4.01740200  | 0.00025000  |
| C  | 3.36175900  | 6.19129700  | -2.59749500 |
| H  | 3.73061300  | 5.69206200  | -4.66109400 |
| H  | 3.08630500  | 6.36901900  | -0.47050300 |
| H  | 3.09459100  | 7.22284200  | -2.80547600 |
| H  | 3.89257500  | 0.06999200  | -1.19555500 |
| H  | 5.54838500  | 2.09040000  | -1.61265500 |
| Cl | -1.24159400 | -7.05473000 | 1.15225600  |

TS4CCl-SS

|    |             |             |             |
|----|-------------|-------------|-------------|
| C  | -6.27739300 | -1.87556500 | 1.81675600  |
| C  | -5.31185500 | -1.12012900 | 1.14491700  |
| C  | -4.92385800 | -1.42217600 | -0.15378200 |
| C  | -5.55901700 | -2.50324800 | -0.75925200 |
| C  | -6.54000000 | -3.25502800 | -0.12088000 |
| C  | -6.90252500 | -2.94187300 | 1.18702600  |
| C  | -6.48434600 | -1.36157800 | 3.22063500  |
| C  | -5.94602100 | 0.06432600  | 3.12420800  |
| C  | -4.79045900 | -0.06047900 | 2.09944500  |
| H  | -4.17423000 | -0.85725500 | -0.70159800 |
| H  | -7.00872800 | -4.08128400 | -0.64311400 |
| H  | -7.66236100 | -3.52353700 | 1.69944900  |
| H  | -7.52734200 | -1.35976000 | 3.54341300  |
| H  | -5.61318100 | 0.49664200  | 4.07656000  |
| H  | -3.87516200 | -0.40128500 | 2.59548800  |
| H  | -5.89742200 | -1.94469100 | 3.94096300  |
| Br | -5.03212100 | -3.02097200 | -2.50461000 |
| O  | -6.99319400 | 0.83646600  | 2.56081300  |
| C  | -6.67000400 | 2.19154900  | 2.36678500  |
| H  | -7.47275200 | 2.64588400  | 1.78989800  |
| H  | -6.55602300 | 2.71176700  | 3.32861100  |
| N  | -4.51151000 | 1.26477800  | 1.54244800  |
| C  | -3.41913200 | 1.71080400  | 0.91158400  |

|   |             |             |             |
|---|-------------|-------------|-------------|
| C | -5.38734900 | 2.31338100  | 1.60659500  |
| N | -4.87757300 | 3.38003300  | 1.06184600  |
| N | -3.65019100 | 2.98253600  | 0.62736200  |
| C | -2.73980600 | 3.96460900  | 0.09506200  |
| C | -2.94215600 | 4.45197200  | -1.19610900 |
| C | -1.75204500 | 4.45314400  | 0.95844800  |
| C | -2.07887600 | 5.46106200  | -1.63226400 |
| C | -0.93504800 | 5.47192400  | 0.47951500  |
| C | -1.08243900 | 5.98714600  | -0.81223600 |
| H | -2.21313600 | 5.85940500  | -2.63513600 |
| H | -0.18175500 | 5.88701400  | 1.14369400  |
| C | -0.18618400 | 7.09508400  | -1.30455100 |
| H | 0.15797600  | 7.72031200  | -0.47644300 |
| H | 0.69992900  | 6.69135300  | -1.80709300 |
| H | -0.70651700 | 7.73216800  | -2.02297000 |
| C | -1.58386400 | 3.90837200  | 2.35033300  |
| H | -2.54249900 | 3.84620000  | 2.87499300  |
| H | -1.14464500 | 2.90758400  | 2.30439700  |
| H | -0.91678300 | 4.54880300  | 2.92971300  |
| C | -4.05437100 | 3.96453600  | -2.08456800 |
| H | -4.47194000 | 3.01088500  | -1.76324600 |
| H | -4.87331400 | 4.69127500  | -2.09271600 |
| H | -3.69361500 | 3.86500200  | -3.11230000 |
| H | -2.48546200 | 1.18389100  | 0.72263600  |
| B | -6.68283600 | 1.33053800  | -1.41703500 |
| F | -5.31981600 | 1.24759800  | -1.02913500 |
| F | -6.78494100 | 2.21974500  | -2.48731100 |
| F | -7.41792300 | 1.80921400  | -0.32119800 |
| F | -7.13142700 | 0.06332600  | -1.77907200 |
| N | -2.57382000 | -0.62034300 | -2.90437000 |
| C | -1.34873500 | -1.37813900 | -3.14601500 |
| C | -1.55141600 | -2.88784200 | -3.12323300 |
| H | -0.63491000 | -1.12223300 | -2.35928100 |
| H | -0.87558500 | -1.08155400 | -4.10213200 |
| H | -0.60623600 | -3.39375900 | -3.34527300 |
| H | -1.88582800 | -3.20030100 | -2.13034300 |
| H | -2.29936800 | -3.21621200 | -3.85086300 |
| C | -3.33029200 | -0.44142300 | -4.13889700 |
| C | -4.65582300 | 0.28016400  | -3.94771500 |
| H | -3.52894800 | -1.44248200 | -4.54184500 |
| H | -2.72504900 | 0.08260200  | -4.90511100 |
| H | -5.21710000 | 0.26947100  | -4.88709900 |
| H | -5.25920900 | -0.20360100 | -3.17675100 |
| H | -4.52546900 | 1.32488400  | -3.65332300 |

|   |             |             |             |
|---|-------------|-------------|-------------|
| C | -2.32068300 | 0.61783400  | -2.17009000 |
| C | -1.41367400 | 1.64423200  | -2.85466800 |
| H | -1.86340300 | 0.32365900  | -1.21953400 |
| H | -3.28675400 | 1.07146800  | -1.92723200 |
| H | -1.25607400 | 2.50069200  | -2.19066300 |
| H | -0.43184000 | 1.21145300  | -3.08233700 |
| H | -1.85030700 | 2.01029700  | -3.79016100 |
| C | 1.65116900  | -0.85838800 | -0.98051800 |
| C | 0.57227000  | -0.35193000 | -0.24166100 |
| H | 2.12479400  | -0.10950500 | -1.61636600 |
| C | 0.40326500  | 1.08047100  | -0.14995300 |
| H | 1.16549200  | 1.67152300  | -0.69161700 |
| O | -0.52823300 | 1.65335300  | 0.41545300  |
| C | 1.71452800  | -2.21466200 | -1.57905700 |
| C | 2.14644200  | -2.32738900 | -2.90913300 |
| C | 1.35539100  | -3.38179300 | -0.89131300 |
| C | 2.23889600  | -3.56878600 | -3.53209300 |
| H | 2.38984800  | -1.42464800 | -3.46703900 |
| C | 1.44886600  | -4.62227100 | -1.51506800 |
| H | 1.00568500  | -3.31635400 | 0.13229300  |
| C | 1.89549600  | -4.72322300 | -2.83189200 |
| H | 2.57046000  | -3.63144700 | -4.56361900 |
| H | 1.17196700  | -5.51682300 | -0.96680000 |
| H | 1.96783400  | -5.69399800 | -3.31073100 |
| C | -0.40221900 | -1.17217200 | 0.39392500  |
| C | -1.25966500 | -1.85433600 | 0.92216700  |
| C | -2.20778200 | -2.67362200 | 1.61505800  |
| C | -2.39437000 | -2.50920200 | 2.99655200  |
| C | -2.97076400 | -3.63462600 | 0.93357800  |
| C | -3.34723300 | -3.25721000 | 3.67811500  |
| H | -1.79207400 | -1.78129600 | 3.53069600  |
| C | -3.90860500 | -4.40159400 | 1.61095800  |
| H | -2.86995600 | -3.74153100 | -0.14223300 |
| C | -4.09901600 | -4.19132800 | 2.97273100  |
| H | -3.50326400 | -3.12175600 | 4.74277100  |
| H | -4.51448300 | -5.12814100 | 1.08203800  |
| C | 6.95955900  | -2.31648500 | -2.37446600 |
| C | 6.32465500  | -1.50617500 | -1.43098400 |
| C | 6.71268500  | -1.48834600 | -0.09897000 |
| C | 7.75543600  | -2.33705700 | 0.26780200  |
| C | 8.38961700  | -3.17073400 | -0.64835100 |
| C | 7.99118100  | -3.15859300 | -1.98484400 |
| C | 6.37078700  | -2.08868000 | -3.74783500 |
| C | 5.69599800  | -0.72370400 | -3.59498600 |

|    |            |             |             |
|----|------------|-------------|-------------|
| C  | 5.21590900 | -0.74211200 | -2.12566600 |
| H  | 6.23329200 | -0.85106600 | 0.63937300  |
| H  | 9.19757000 | -3.81403300 | -0.32002600 |
| H  | 8.49705900 | -3.79153800 | -2.70647200 |
| H  | 7.11243400 | -2.06703500 | -4.54853300 |
| H  | 4.87348400 | -0.54454900 | -4.29941000 |
| H  | 4.26553000 | -1.28018800 | -2.06791500 |
| H  | 5.62054300 | -2.85043200 | -3.98812600 |
| Br | 8.33543600 | -2.35266400 | 2.07202000  |
| O  | 6.70818600 | 0.25748100  | -3.74701000 |
| C  | 6.22750800 | 1.57145200  | -3.59782400 |
| H  | 7.08016300 | 2.25003100  | -3.62952100 |
| H  | 5.53365300 | 1.83631500  | -4.40795500 |
| N  | 4.99384200 | 0.62383000  | -1.64304800 |
| C  | 4.31163400 | 1.08195400  | -0.56393000 |
| C  | 5.50909500 | 1.71553800  | -2.28938300 |
| N  | 5.20284300 | 2.81459300  | -1.66595700 |
| N  | 4.46080700 | 2.40847700  | -0.60033000 |
| C  | 3.98158300 | 3.41844900  | 0.31016900  |
| C  | 3.02845900 | 4.31418800  | -0.16531400 |
| C  | 4.54121500 | 3.48831300  | 1.59174600  |
| C  | 2.64742000 | 5.34672100  | 0.69388200  |
| C  | 4.11067400 | 4.52620600  | 2.41040500  |
| C  | 3.16809500 | 5.46604000  | 1.97837600  |
| H  | 1.92231900 | 6.07324600  | 0.33751000  |
| H  | 4.52259600 | 4.60621100  | 3.41326400  |
| C  | 2.70501800 | 6.56395600  | 2.89979200  |
| H  | 2.01225500 | 6.16785400  | 3.64929500  |
| H  | 3.54571600 | 7.01173200  | 3.43546600  |
| H  | 2.18742900 | 7.35154400  | 2.34740700  |
| C  | 5.53156300 | 2.46656800  | 2.08332500  |
| H  | 5.01257900 | 1.54173900  | 2.36430400  |
| H  | 6.27876700 | 2.22202800  | 1.32166400  |
| H  | 6.05587300 | 2.83937700  | 2.96459100  |
| C  | 2.40021600 | 4.20383300  | -1.53101100 |
| H  | 2.52580800 | 3.21241100  | -1.97187000 |
| H  | 1.32662900 | 4.40297100  | -1.45495100 |
| H  | 2.83619100 | 4.93036900  | -2.22371800 |
| C  | 2.77298500 | -1.66911500 | 1.66503900  |
| C  | 3.34622200 | -1.02798300 | 0.42156400  |
| H  | 2.79193600 | -2.75721200 | 1.55185000  |
| C  | 3.46165900 | 0.37081600  | 0.46005500  |
| O  | 2.77107900 | 1.10612200  | 1.18733700  |
| C  | 3.56058400 | -1.25973100 | 2.89593900  |



|    |             |             |             |
|----|-------------|-------------|-------------|
| C  | 4.85732500  | -1.73804400 | 3.11033400  |
| C  | 3.02598200  | -0.34331100 | 3.80448400  |
| C  | 5.59982100  | -1.31151200 | 4.20909000  |
| H  | 5.29407300  | -2.44850500 | 2.40977400  |
| C  | 3.76424500  | 0.08207500  | 4.90672000  |
| H  | 2.03069900  | 0.05219000  | 3.62557900  |
| C  | 5.05457900  | -0.40052900 | 5.11214700  |
| H  | 6.60578600  | -1.69048600 | 4.35634700  |
| H  | 3.33311100  | 0.79721700  | 5.60056500  |
| H  | 5.63324500  | -0.06846700 | 5.96823200  |
| H  | 4.06048100  | -1.62132800 | -0.13379600 |
| H  | 1.73066500  | -1.35812100 | 1.79505800  |
| Cl | -5.33797600 | -5.09351300 | 3.80980600  |

TS4CCI-RR

|    |             |             |             |
|----|-------------|-------------|-------------|
| C  | -0.57651600 | -4.49183100 | 0.86480100  |
| C  | -1.10043700 | -3.20661400 | 0.72416100  |
| C  | -0.96589400 | -2.49001700 | -0.45910700 |
| C  | -0.27253200 | -3.10530700 | -1.49661100 |
| C  | 0.24492900  | -4.39515800 | -1.38615700 |
| C  | 0.09400000  | -5.09539000 | -0.19251800 |
| C  | -0.82845800 | -5.03930300 | 2.24814900  |
| C  | -1.85222000 | -4.06960100 | 2.85101000  |
| C  | -1.65597200 | -2.75218300 | 2.05372500  |
| H  | -1.38403900 | -1.49905300 | -0.61630100 |
| H  | 0.75790400  | -4.84430600 | -2.23025700 |
| H  | 0.48998600  | -6.10146100 | -0.09827700 |
| H  | -1.24019400 | -6.05151600 | 2.24479600  |
| H  | -1.71512700 | -3.90717900 | 3.92847400  |
| H  | -0.93132400 | -2.09163100 | 2.54073900  |
| H  | 0.09117900  | -5.05906600 | 2.84286800  |
| Br | 0.00724600  | -2.14200700 | -3.09585200 |
| O  | -3.13779500 | -4.61040700 | 2.61207900  |
| C  | -4.16357900 | -3.81470900 | 3.16155400  |
| H  | -5.11598200 | -4.27215300 | 2.90550900  |
| H  | -4.05650600 | -3.73151700 | 4.25257700  |
| N  | -2.91674500 | -2.00880800 | 2.00947500  |
| C  | -3.16622500 | -0.80470300 | 1.48839200  |
| C  | -4.09653300 | -2.45772100 | 2.53721400  |
| N  | -5.03585900 | -1.56609900 | 2.41063300  |
| N  | -4.43557400 | -0.54190600 | 1.74564500  |
| C  | -5.14184300 | 0.67567200  | 1.46451000  |
| C  | -6.33384300 | 0.58768600  | 0.73545700  |
| C  | -4.62946800 | 1.87636800  | 1.96882800  |

|   |             |             |             |
|---|-------------|-------------|-------------|
| C | -7.02616500 | 1.77616900  | 0.51562800  |
| C | -5.36743800 | 3.03268100  | 1.71305800  |
| C | -6.56086900 | 3.00271400  | 0.99432300  |
| H | -7.95260900 | 1.74019100  | -0.05288800 |
| H | -4.99871400 | 3.98063700  | 2.09498700  |
| C | -7.33553000 | 4.26558400  | 0.72777900  |
| H | -8.39659700 | 4.12935200  | 0.95336700  |
| H | -6.95571300 | 5.09709200  | 1.32529500  |
| H | -7.25800100 | 4.55206500  | -0.32645300 |
| C | -3.36115100 | 1.94371400  | 2.78299300  |
| H | -3.34405900 | 1.17112600  | 3.55880500  |
| H | -2.46110700 | 1.81146200  | 2.17157900  |
| H | -3.29012800 | 2.91742500  | 3.27105200  |
| C | -6.83433300 | -0.72101300 | 0.18831400  |
| H | -6.02848600 | -1.31828000 | -0.24378500 |
| H | -7.28529200 | -1.33030200 | 0.97667600  |
| H | -7.58670200 | -0.54128100 | -0.58221300 |
| H | -2.45171200 | -0.14393200 | 1.01438400  |
| B | -5.13838900 | -3.85545200 | -0.45507800 |
| F | -4.24283100 | -2.78621800 | -0.20869200 |
| F | -6.19837200 | -3.37615100 | -1.23761700 |
| F | -5.63886000 | -4.31528900 | 0.77284000  |
| F | -4.47341500 | -4.87892300 | -1.11964000 |
| N | -2.84127200 | -0.36994500 | -2.92058800 |
| C | -2.05702200 | 0.72908000  | -3.46576400 |
| C | -2.67226100 | 1.60094800  | -4.57023200 |
| H | -1.12542400 | 0.29645500  | -3.85587000 |
| H | -1.75877500 | 1.36431000  | -2.62457200 |
| H | -1.89716000 | 2.25278000  | -4.98537400 |
| H | -3.06855000 | 0.99263500  | -5.38893200 |
| H | -3.47911100 | 2.24208700  | -4.20491800 |
| C | -3.25079600 | -1.33815700 | -3.92878400 |
| C | -3.66917600 | -2.66878200 | -3.32046000 |
| H | -2.38536600 | -1.49693100 | -4.58359700 |
| H | -4.06277300 | -0.95640000 | -4.57387700 |
| H | -3.85692800 | -3.40042600 | -4.11223200 |
| H | -2.87917200 | -3.05259700 | -2.66927300 |
| H | -4.57708600 | -2.58582300 | -2.71929900 |
| C | -3.89089700 | 0.00735100  | -1.97794400 |
| C | -5.22287000 | 0.47636700  | -2.58180400 |
| H | -3.47329700 | 0.79453500  | -1.33342600 |
| H | -4.08843100 | -0.85540600 | -1.32904900 |
| H | -5.85672700 | 0.91052100  | -1.80427900 |
| H | -5.08031900 | 1.23213100  | -3.35817800 |

|   |             |             |             |
|---|-------------|-------------|-------------|
| H | -5.76723500 | -0.36300000 | -3.02682900 |
| C | 1.44346500  | 0.66563900  | -1.08648600 |
| C | 0.38964500  | 0.85524300  | -0.16463200 |
| H | 1.92898000  | -0.30500400 | -0.97902400 |
| C | 0.36131200  | 0.01025700  | 0.99947500  |
| H | 1.19911500  | -0.71289900 | 1.05616500  |
| O | -0.51480000 | -0.00613000 | 1.87048500  |
| C | 1.46516800  | 1.12988400  | -2.49717900 |
| C | 2.19409700  | 0.37307700  | -3.42650000 |
| C | 0.80172500  | 2.27771600  | -2.95257400 |
| C | 2.24350500  | 0.73462700  | -4.76779800 |
| H | 2.69809400  | -0.53098800 | -3.09610500 |
| C | 0.86283500  | 2.64758000  | -4.29353900 |
| H | 0.23235500  | 2.88432300  | -2.25863000 |
| C | 1.57542100  | 1.87596900  | -5.20813300 |
| H | 2.80114200  | 0.12226900  | -5.46909700 |
| H | 0.34514100  | 3.54301300  | -4.62319200 |
| H | 1.61277000  | 2.16266300  | -6.25406500 |
| C | -0.61910000 | 1.85573000  | -0.22642700 |
| C | -1.52119900 | 2.67329700  | -0.21340500 |
| C | -2.51190700 | 3.70927400  | -0.23170200 |
| C | -3.51540000 | 3.73000500  | -1.21211800 |
| C | -2.46219700 | 4.74570200  | 0.71346400  |
| C | -4.43663900 | 4.76878900  | -1.26193500 |
| H | -3.56289200 | 2.93022400  | -1.94459500 |
| C | -3.37684600 | 5.79056800  | 0.66910500  |
| H | -1.68791000 | 4.73328900  | 1.47326300  |
| C | -4.35113400 | 5.79399200  | -0.32484700 |
| H | -5.20472200 | 4.79069700  | -2.02732700 |
| H | -3.33046900 | 6.59994300  | 1.38903600  |
| C | 7.07999000  | -0.48529500 | -1.76794900 |
| C | 5.94612100  | -0.23137700 | -1.00013600 |
| C | 4.80957500  | -1.00966000 | -1.09040600 |
| C | 4.80955600  | -2.05498500 | -2.00466900 |
| C | 5.90616200  | -2.30706800 | -2.82276600 |
| C | 7.05444000  | -1.51669500 | -2.69941700 |
| C | 8.20121400  | 0.43183800  | -1.32646900 |
| C | 7.77068100  | 0.81291100  | 0.09987700  |
| C | 6.22539100  | 0.87738500  | -0.01313800 |
| H | 3.94450500  | -0.84404000 | -0.45822900 |
| H | 5.87904400  | -3.12824000 | -3.52963900 |
| H | 7.92466900  | -1.73872300 | -3.30839600 |
| H | 9.18178300  | -0.04749800 | -1.31258200 |
| H | 8.20350700  | 1.74973000  | 0.46937200  |

|    |             |             |             |
|----|-------------|-------------|-------------|
| H  | 5.90268900  | 1.86600800  | -0.35675800 |
| H  | 8.26164100  | 1.32689400  | -1.95448100 |
| Br | 3.24369000  | -3.11635200 | -2.05893900 |
| O  | 8.15160900  | -0.27523700 | 0.92747600  |
| C  | 7.71736400  | -0.14704000 | 2.26223200  |
| H  | 8.03374800  | -1.03494500 | 2.80906700  |
| H  | 8.15181700  | 0.74220400  | 2.73959100  |
| N  | 5.57038700  | 0.59213500  | 1.26611000  |
| C  | 4.24856100  | 0.59215900  | 1.56725400  |
| C  | 6.22396800  | -0.03767900 | 2.28909400  |
| N  | 5.38731600  | -0.43665200 | 3.20239700  |
| N  | 4.16905300  | -0.04195900 | 2.74100600  |
| C  | 2.98404300  | -0.46565900 | 3.44370200  |
| C  | 2.48181300  | 0.35750400  | 4.45246400  |
| C  | 2.44405600  | -1.70980300 | 3.11159400  |
| C  | 1.33811700  | -0.07902400 | 5.11388300  |
| C  | 1.31293800  | -2.10712200 | 3.82467900  |
| C  | 0.73321100  | -1.29792800 | 4.80174700  |
| H  | 0.90955100  | 0.54743800  | 5.89133700  |
| H  | 0.88174000  | -3.08293600 | 3.61272900  |
| C  | -0.53385600 | -1.72417100 | 5.49418200  |
| H  | -0.65853000 | -1.21007000 | 6.44910100  |
| H  | -1.40572700 | -1.47932100 | 4.87421900  |
| H  | -0.54305000 | -2.80164500 | 5.67935200  |
| C  | 3.03583800  | -2.59665800 | 2.04270000  |
| H  | 2.66342800  | -2.34683400 | 1.04026700  |
| H  | 4.12730300  | -2.53520500 | 2.01816200  |
| H  | 2.76045300  | -3.63735100 | 2.22650400  |
| C  | 3.15514400  | 1.65827100  | 4.78837200  |
| H  | 4.20315800  | 1.49758200  | 5.05952600  |
| H  | 3.12495600  | 2.32272500  | 3.91999200  |
| H  | 2.65376900  | 2.14579900  | 5.62544400  |
| C  | 2.67238600  | 3.23695200  | -0.63990200 |
| C  | 3.13151900  | 1.80924500  | -0.39743200 |
| H  | 1.66556000  | 3.36981500  | -0.22970600 |
| C  | 3.13486200  | 1.42732800  | 0.96341400  |
| O  | 2.25638000  | 1.77043500  | 1.77206600  |
| C  | 3.63639600  | 4.19824200  | 0.02063100  |
| C  | 4.83638300  | 4.53996600  | -0.61257900 |
| C  | 3.38494300  | 4.70231500  | 1.30021400  |
| C  | 5.76902100  | 5.35890300  | 0.01927900  |
| H  | 5.03461200  | 4.16156100  | -1.61372100 |
| C  | 4.31590700  | 5.52341500  | 1.93391700  |
| H  | 2.45717900  | 4.43530100  | 1.79780000  |

|    |             |            |             |
|----|-------------|------------|-------------|
| C  | 5.51125100  | 5.85186400 | 1.29779900  |
| H  | 6.69260900  | 5.61923000 | -0.48864400 |
| H  | 4.10546600  | 5.90948200 | 2.92662600  |
| H  | 6.23433900  | 6.49321500 | 1.79120800  |
| H  | 3.92553400  | 1.45647800 | -1.04850900 |
| H  | 2.63386400  | 3.43244300 | -1.71332600 |
| Cl | -5.47443200 | 7.12983800 | -0.41160200 |

TS4CCl-SR

|    |            |             |             |
|----|------------|-------------|-------------|
| C  | 1.30778500 | -4.74019500 | 0.52068900  |
| C  | 1.71161100 | -3.42914000 | 0.26436200  |
| C  | 1.99239000 | -2.53061800 | 1.28666200  |
| C  | 1.85750800 | -3.00216600 | 2.58932600  |
| C  | 1.43235900 | -4.29746800 | 2.87280500  |
| C  | 1.15264600 | -5.17737200 | 1.82914500  |
| C  | 1.10579700 | -5.50200800 | -0.76912000 |
| C  | 1.87391300 | -4.66298900 | -1.79687100 |
| C  | 1.75779500 | -3.22648000 | -1.23445400 |
| H  | 2.36454900 | -1.52367200 | 1.11692500  |
| H  | 1.34581200 | -4.61953600 | 3.90407000  |
| H  | 0.84193900 | -6.19461200 | 2.04454500  |
| H  | 1.49508500 | -6.52197100 | -0.74286800 |
| H  | 1.47175100 | -4.72990000 | -2.81698500 |
| H  | 0.84622300 | -2.76415500 | -1.61930200 |
| H  | 0.04340400 | -5.54724500 | -1.03607100 |
| Br | 2.31820800 | -1.86534400 | 4.03288200  |
| O  | 3.22005200 | -5.09335800 | -1.77404200 |
| C  | 4.05480200 | -4.37651800 | -2.65354400 |
| H  | 5.07573000 | -4.71447200 | -2.48969400 |
| H  | 3.76412500 | -4.54695200 | -3.69995400 |
| N  | 2.87125400 | -2.41168900 | -1.71288800 |
| C  | 3.05559300 | -1.09486800 | -1.60395600 |
| C  | 3.97075000 | -2.91162000 | -2.35211300 |
| N  | 4.79167900 | -1.95491700 | -2.68153100 |
| N  | 4.20414600 | -0.82542700 | -2.19935400 |
| C  | 4.78911200 | 0.46941600  | -2.41034700 |
| C  | 6.10611200 | 0.68534200  | -1.98510300 |
| C  | 4.02124800 | 1.44244900  | -3.06271800 |
| C  | 6.65023900 | 1.94476700  | -2.23380000 |
| C  | 4.62188100 | 2.68298300  | -3.27913400 |
| C  | 5.92580400 | 2.95573800  | -2.86596800 |
| H  | 7.66557900 | 2.14450900  | -1.90111800 |
| H  | 4.05721500 | 3.45134100  | -3.80267300 |
| C  | 6.51874800 | 4.32708800  | -3.05145500 |

|   |             |             |             |
|---|-------------|-------------|-------------|
| H | 7.59694600  | 4.27522800  | -3.21688200 |
| H | 6.06032600  | 4.84732900  | -3.89559200 |
| H | 6.35078700  | 4.93361200  | -2.15436300 |
| C | 2.61104900  | 1.18696000  | -3.53672800 |
| H | 2.51598200  | 0.21160500  | -4.02333300 |
| H | 1.88291300  | 1.20595100  | -2.71583800 |
| H | 2.32065100  | 1.95335600  | -4.25859500 |
| C | 6.90523600  | -0.36831100 | -1.26730600 |
| H | 6.29506300  | -0.93207800 | -0.55924700 |
| H | 7.32285900  | -1.08888300 | -1.97686000 |
| H | 7.73255100  | 0.09965300  | -0.72993400 |
| H | 2.38687000  | -0.38126300 | -1.14306900 |
| B | 5.43323900  | -3.14364000 | 0.74726700  |
| F | 4.68035300  | -2.01976700 | 0.31569300  |
| F | 6.75555800  | -2.74200300 | 0.94898700  |
| F | 5.38494800  | -4.11741300 | -0.26123200 |
| F | 4.87988000  | -3.64081400 | 1.92381700  |
| N | 3.61960900  | 0.81914800  | 2.39201700  |
| C | 2.56283300  | 1.62585200  | 2.99273200  |
| C | 2.96727100  | 2.90893600  | 3.73237600  |
| H | 2.02496200  | 0.98357700  | 3.70569300  |
| H | 1.84560300  | 1.86752700  | 2.20213600  |
| H | 2.06636400  | 3.39667900  | 4.12108600  |
| H | 3.61426900  | 2.69020400  | 4.58687400  |
| H | 3.48835400  | 3.62185200  | 3.08792400  |
| C | 4.73429900  | 0.58840100  | 3.29930900  |
| C | 5.62303600  | -0.57206600 | 2.88076400  |
| H | 4.29494600  | 0.35589700  | 4.27930000  |
| H | 5.34725100  | 1.49642900  | 3.44835000  |
| H | 6.41283900  | -0.71913700 | 3.62420300  |
| H | 5.03828700  | -1.49019700 | 2.79966800  |
| H | 6.10609700  | -0.40425500 | 1.91495500  |
| C | 3.98195900  | 1.16077800  | 1.02176000  |
| C | 4.76917400  | 2.45589600  | 0.79053500  |
| H | 3.04380200  | 1.22383400  | 0.45455600  |
| H | 4.54101700  | 0.31241200  | 0.60669100  |
| H | 4.93292700  | 2.59961500  | -0.28219800 |
| H | 4.22277000  | 3.32952600  | 1.15680800  |
| H | 5.74851700  | 2.42642900  | 1.28065400  |
| C | -1.01987100 | -0.17341800 | 1.41000700  |
| C | -0.32874600 | 0.16583400  | 0.23376900  |
| H | -1.26247500 | -1.23332100 | 1.51033500  |
| C | -0.32565500 | -0.79358200 | -0.83235300 |
| H | -0.81501300 | -1.75800200 | -0.57551700 |

|    |             |             |             |
|----|-------------|-------------|-------------|
| O  | 0.15208300  | -0.62853500 | -1.96237300 |
| C  | -0.88777200 | 0.56044800  | 2.67912700  |
| C  | -0.67193800 | -0.18289900 | 3.84405700  |
| C  | -0.96423100 | 1.95904600  | 2.76708800  |
| C  | -0.47666900 | 0.45681300  | 5.06586000  |
| H  | -0.60443100 | -1.26514400 | 3.78145800  |
| C  | -0.79202700 | 2.59361100  | 3.98997200  |
| H  | -1.17108000 | 2.54803000  | 1.87843500  |
| C  | -0.53631100 | 1.84441900  | 5.14162900  |
| H  | -0.27987300 | -0.13364000 | 5.95479000  |
| H  | -0.85985000 | 3.67548800  | 4.04969100  |
| H  | -0.39132600 | 2.34549500  | 6.09314000  |
| C  | 0.31780700  | 1.41102900  | 0.02411100  |
| C  | 0.85708800  | 2.48934800  | -0.13704100 |
| C  | 1.58059400  | 3.71981800  | -0.16985400 |
| C  | 2.26298700  | 4.12620400  | -1.32415100 |
| C  | 1.65511800  | 4.51135600  | 0.98796800  |
| C  | 3.03812500  | 5.27801800  | -1.31704700 |
| H  | 2.19284400  | 3.52439000  | -2.22309400 |
| C  | 2.42268300  | 5.66840200  | 0.99998300  |
| H  | 1.12663400  | 4.19740100  | 1.88357300  |
| C  | 3.11570700  | 6.03398900  | -0.15139300 |
| H  | 3.57978400  | 5.58781200  | -2.20437300 |
| H  | 2.49525500  | 6.27480300  | 1.89572600  |
| C  | -3.60711100 | 4.19018000  | -1.14457600 |
| C  | -3.88946900 | 2.84037500  | -0.92270700 |
| C  | -5.13666200 | 2.41236800  | -0.49138500 |
| C  | -6.09825800 | 3.39317800  | -0.25772400 |
| C  | -5.83775900 | 4.74612700  | -0.45226200 |
| C  | -4.58095700 | 5.14948600  | -0.90518000 |
| C  | -2.19285400 | 4.35673900  | -1.65561000 |
| C  | -1.85580000 | 2.95523700  | -2.16840500 |
| C  | -2.63245700 | 2.04086200  | -1.19261300 |
| H  | -5.36956600 | 1.36341200  | -0.32845000 |
| H  | -6.61506100 | 5.47681800  | -0.26138900 |
| H  | -4.38038100 | 6.20204500  | -1.07663300 |
| H  | -2.09675900 | 5.09639100  | -2.45285700 |
| H  | -0.78527400 | 2.71827600  | -2.18345300 |
| H  | -2.04798200 | 1.90780600  | -0.28055800 |
| H  | -1.50525200 | 4.62938400  | -0.84588100 |
| Br | -7.81342500 | 2.86161700  | 0.34955200  |
| O  | -2.41194400 | 2.83968800  | -3.46903200 |
| C  | -2.17718200 | 1.57372700  | -4.03640200 |
| H  | -2.67997700 | 1.53129100  | -5.00270100 |

|   |             |             |             |
|---|-------------|-------------|-------------|
| H | -1.10180400 | 1.39478100  | -4.18138400 |
| N | -2.84259700 | 0.71930900  | -1.78842500 |
| C | -3.22293200 | -0.45520400 | -1.23185400 |
| C | -2.71084500 | 0.50378800  | -3.13353600 |
| N | -3.03244500 | -0.71750100 | -3.44508300 |
| N | -3.34590000 | -1.30104700 | -2.26043200 |
| C | -3.84066000 | -2.65377600 | -2.26241700 |
| C | -3.00310800 | -3.65396200 | -2.75421200 |
| C | -5.14540300 | -2.89041200 | -1.81122600 |
| C | -3.50648700 | -4.95623500 | -2.76415900 |
| C | -5.59493100 | -4.20637600 | -1.84893200 |
| C | -4.79088000 | -5.25127800 | -2.31310200 |
| H | -2.87196600 | -5.75729900 | -3.13502500 |
| H | -6.60324400 | -4.42212100 | -1.50423100 |
| C | -5.30589000 | -6.66675700 | -2.30594100 |
| H | -4.68062600 | -7.31941500 | -2.91812000 |
| H | -5.31478400 | -7.06687800 | -1.28730700 |
| H | -6.33017100 | -6.71325700 | -2.68426100 |
| C | -6.03492300 | -1.79448500 | -1.28482500 |
| H | -5.79309000 | -1.56334600 | -0.23985600 |
| H | -5.94470500 | -0.87576200 | -1.87329600 |
| H | -7.07858300 | -2.11196100 | -1.31510700 |
| C | -1.61860800 | -3.36912700 | -3.27681300 |
| H | -1.65438000 | -3.12553800 | -4.34312100 |
| H | -1.14195100 | -2.52058900 | -2.77809700 |
| H | -0.98896500 | -4.25442000 | -3.15902300 |
| C | -3.79146900 | -0.40816400 | 2.58525200  |
| C | -3.31631500 | 0.05919800  | 1.22987800  |
| H | -3.69875800 | 0.40898200  | 3.30747000  |
| C | -3.31826300 | -0.89969200 | 0.21082500  |
| O | -3.25647000 | -2.13273900 | 0.37923000  |
| C | -5.22921700 | -0.87839500 | 2.47369800  |
| C | -5.53701000 | -2.24000100 | 2.50729900  |
| C | -6.25975400 | 0.03724500  | 2.22793600  |
| C | -6.84506900 | -2.68034800 | 2.30783000  |
| H | -4.73802600 | -2.95674100 | 2.67023500  |
| C | -7.56549500 | -0.39977800 | 2.02475900  |
| H | -6.03696300 | 1.10247200  | 2.18221100  |
| C | -7.86285700 | -1.76209400 | 2.06544400  |
| H | -7.06501400 | -3.74323500 | 2.33385300  |
| H | -8.34906500 | 0.32498700  | 1.82860900  |
| H | -8.88074300 | -2.10308400 | 1.90544900  |
| H | -3.45629800 | 1.10729900  | 0.99847000  |
| H | -3.16882100 | -1.23591600 | 2.94439500  |



|          |             |             |             |
|----------|-------------|-------------|-------------|
| Cl       | 4.10457800  | 7.47207000  | -0.13370500 |
| R2F      |             |             |             |
| C        | -2.77090000 | 1.28580800  | -0.00296800 |
| C        | -1.55073500 | 1.87850000  | -0.00564800 |
| H        | -3.61639300 | 1.97315800  | -0.03269200 |
| C        | -1.53600400 | 3.36488500  | -0.03066900 |
| H        | -2.54230000 | 3.82780000  | -0.04332900 |
| O        | -0.53183100 | 4.03924200  | -0.03643900 |
| C        | -3.14941300 | -0.12239200 | 0.02304300  |
| C        | -4.51454200 | -0.42576500 | -0.11623600 |
| C        | -2.23854900 | -1.18026800 | 0.18625200  |
| C        | -4.95891200 | -1.74140000 | -0.10830000 |
| H        | -5.22728900 | 0.38555400  | -0.23489100 |
| C        | -2.68726800 | -2.49476400 | 0.19880400  |
| H        | -1.18411200 | -0.97013400 | 0.31208300  |
| C        | -4.04401600 | -2.78086200 | 0.04844000  |
| H        | -6.01619100 | -1.95608600 | -0.22110100 |
| H        | -1.97431600 | -3.30229300 | 0.32878000  |
| H        | -4.38667100 | -3.81035600 | 0.05758700  |
| C        | -0.27769000 | 1.23946200  | -0.00192100 |
| C        | 0.84290600  | 0.77597100  | -0.00905800 |
| C        | 2.15304500  | 0.20216200  | -0.01513800 |
| C        | 2.31963800  | -1.18202100 | -0.17909400 |
| C        | 3.28254200  | 1.02014100  | 0.14407900  |
| C        | 3.58967900  | -1.74220100 | -0.18242200 |
| H        | 1.44717400  | -1.81378200 | -0.30700100 |
| C        | 4.55620800  | 0.46807400  | 0.14189300  |
| H        | 3.15149700  | 2.08916900  | 0.26930700  |
| C        | 4.68406800  | -0.90416700 | -0.02108600 |
| H        | 3.74340500  | -2.80755800 | -0.30756800 |
| H        | 5.44299700  | 1.07888800  | 0.26336800  |
| F        | 5.91294700  | -1.44169700 | -0.02365000 |
| TS4CF-RS |             |             |             |
| C        | -3.68614900 | -1.38995500 | 3.40051100  |
| C        | -3.40429600 | -0.78703800 | 2.17163500  |
| C        | -3.75496000 | -1.37651200 | 0.96882700  |
| C        | -4.41432600 | -2.60042600 | 1.03852500  |
| C        | -4.70258700 | -3.22873400 | 2.24397400  |
| C        | -4.33249400 | -2.61671000 | 3.44265400  |
| C        | -3.19522600 | -0.52724700 | 4.54209400  |
| C        | -3.02529300 | 0.84182400  | 3.87762300  |
| C        | -2.63191300 | 0.48482200  | 2.42716200  |

|    |             |             |             |
|----|-------------|-------------|-------------|
| H  | -3.56123200 | -0.91509500 | 0.00492600  |
| H  | -5.21705700 | -4.18278000 | 2.24526900  |
| H  | -4.56272700 | -3.09468400 | 4.38959100  |
| H  | -3.89480800 | -0.46362700 | 5.37827900  |
| H  | -2.28291800 | 1.49629800  | 4.35387800  |
| H  | -1.54923100 | 0.32989400  | 2.34300000  |
| H  | -2.23359000 | -0.88591000 | 4.92724100  |
| Br | -4.91438900 | -3.44827300 | -0.57929900 |
| O  | -4.30784800 | 1.44590900  | 3.88656200  |
| C  | -4.37307400 | 2.71169500  | 3.27503500  |
| H  | -5.42688700 | 2.95815100  | 3.15143500  |
| H  | -3.88312600 | 3.47714400  | 3.89298300  |
| N  | -2.93414100 | 1.62616100  | 1.56826000  |
| C  | -2.39096800 | 1.93742000  | 0.39452900  |
| C  | -3.70826200 | 2.68958000  | 1.93354700  |
| N  | -3.64980000 | 3.64215400  | 1.04307300  |
| N  | -2.82071800 | 3.14630100  | 0.08065900  |
| C  | -2.27954200 | 3.95847200  | -0.98059700 |
| C  | -2.78816300 | 3.85198200  | -2.27431600 |
| C  | -1.20726900 | 4.80178700  | -0.64344800 |
| C  | -2.11103700 | 4.55065300  | -3.28025300 |
| C  | -0.57342200 | 5.47265900  | -1.68373100 |
| C  | -0.99577200 | 5.33784200  | -3.01132800 |
| H  | -2.47602200 | 4.46812000  | -4.30120400 |
| H  | 0.27254300  | 6.11651700  | -1.45666000 |
| C  | -0.25101900 | 6.03390100  | -4.11957200 |
| H  | 0.01227100  | 7.05587500  | -3.83415400 |
| H  | 0.68477700  | 5.50867600  | -4.33825000 |
| H  | -0.84500200 | 6.06970600  | -5.03487700 |
| C  | -0.80624900 | 5.04528700  | 0.78943600  |
| H  | -1.49436900 | 5.76430800  | 1.24570800  |
| H  | -0.82466600 | 4.13984200  | 1.40141900  |
| H  | 0.20026800  | 5.46800900  | 0.83093700  |
| C  | -4.04038500 | 3.08695100  | -2.60716000 |
| H  | -4.35144400 | 2.40293100  | -1.81776900 |
| H  | -4.85732800 | 3.79657100  | -2.77481400 |
| H  | -3.90351800 | 2.52437000  | -3.53415900 |
| H  | -1.70141500 | 1.33578100  | -0.18165400 |
| B  | -6.05315600 | 0.81334200  | 0.22102100  |
| F  | -4.77762300 | 1.00121800  | -0.38284300 |
| F  | -6.96639800 | 1.66424800  | -0.39407900 |
| F  | -5.93589500 | 1.12745200  | 1.58271200  |
| F  | -6.43307300 | -0.51830100 | 0.06038300  |
| N  | -2.74880400 | -1.54491700 | -2.62613800 |

|   |             |             |             |
|---|-------------|-------------|-------------|
| C | -1.67299600 | -2.39991000 | -3.11925600 |
| C | -2.06452600 | -3.87315600 | -3.19953500 |
| H | -0.82951100 | -2.28069700 | -2.42800800 |
| H | -1.30624200 | -2.07657300 | -4.11161300 |
| H | -1.16860800 | -4.49612300 | -3.28247700 |
| H | -2.62116600 | -4.17092600 | -2.30637500 |
| H | -2.68810600 | -4.08266700 | -4.07244200 |
| C | -3.94896500 | -1.65518600 | -3.45391300 |
| C | -5.07892400 | -0.73680700 | -3.01218500 |
| H | -4.29979300 | -2.68953800 | -3.37779700 |
| H | -3.71536800 | -1.48134100 | -4.52237900 |
| H | -5.98376400 | -0.98115000 | -3.57620200 |
| H | -5.28867500 | -0.85827000 | -1.94683200 |
| H | -4.85067500 | 0.31777900  | -3.19190700 |
| C | -2.28414400 | -0.16892300 | -2.43822100 |
| C | -1.87676100 | 0.59621300  | -3.70047300 |
| H | -1.41476100 | -0.22472700 | -1.76898700 |
| H | -3.07387300 | 0.37929700  | -1.90924900 |
| H | -1.56271600 | 1.61072100  | -3.43185600 |
| H | -1.03301200 | 0.11913800  | -4.20680300 |
| H | -2.70791000 | 0.67455500  | -4.41007100 |
| C | 1.60087600  | 1.44831600  | -1.26583500 |
| C | 0.83123200  | 1.10066900  | -0.14723800 |
| H | 1.80302000  | 2.51659500  | -1.31971400 |
| C | 0.63521300  | 2.10970000  | 0.86293600  |
| H | 1.07464900  | 3.09194000  | 0.60909500  |
| O | -0.02268100 | 1.97046500  | 1.89872300  |
| C | 1.55828200  | 0.79668700  | -2.59501600 |
| C | 1.57824200  | 1.62186200  | -3.72891400 |
| C | 1.50517400  | -0.59017000 | -2.78180900 |
| C | 1.57771900  | 1.07650300  | -5.00941500 |
| H | 1.58770500  | 2.70015300  | -3.59880300 |
| C | 1.51744200  | -1.13688300 | -4.06078300 |
| H | 1.44733400  | -1.24831400 | -1.92526400 |
| C | 1.56158800  | -0.30668900 | -5.18017900 |
| H | 1.59134500  | 1.73405100  | -5.87293800 |
| H | 1.48698600  | -2.21737400 | -4.16708000 |
| H | 1.57358600  | -0.73457000 | -6.17743400 |
| C | 0.38751000  | -0.22387500 | 0.11955300  |
| C | 0.03144500  | -1.35975100 | 0.37650800  |
| C | -0.26421300 | -2.72934200 | 0.67459700  |
| C | 0.63113800  | -3.47982200 | 1.45177200  |
| C | -1.39482300 | -3.34952400 | 0.12592000  |
| C | 0.40941600  | -4.83286200 | 1.67083200  |

|    |             |             |             |
|----|-------------|-------------|-------------|
| H  | 1.51278700  | -2.99909000 | 1.86501500  |
| C  | -1.63390600 | -4.69896300 | 0.35508200  |
| H  | -2.07718100 | -2.77527600 | -0.49689700 |
| C  | -0.72071500 | -5.41544100 | 1.11423200  |
| H  | 1.09087000  | -5.43735600 | 2.25794100  |
| H  | -2.52203700 | -5.18463700 | -0.03596000 |
| C  | 5.80534100  | -3.29477200 | -1.23758400 |
| C  | 4.85238800  | -2.42984600 | -0.69125500 |
| C  | 3.49320200  | -2.62720600 | -0.87350500 |
| C  | 3.11159400  | -3.70424500 | -1.67730000 |
| C  | 4.04322300  | -4.54624100 | -2.27476800 |
| C  | 5.40544700  | -4.34706300 | -2.04585300 |
| C  | 7.18747100  | -2.93180400 | -0.74232500 |
| C  | 6.86355000  | -2.12958200 | 0.52052600  |
| C  | 5.58067000  | -1.37091300 | 0.11178800  |
| H  | 2.74978200  | -1.98883100 | -0.39976100 |
| H  | 3.70353200  | -5.37009000 | -2.89159000 |
| H  | 6.13231900  | -5.02837500 | -2.47591700 |
| H  | 7.80639800  | -3.79914600 | -0.50545900 |
| H  | 7.66364700  | -1.46204200 | 0.86209300  |
| H  | 5.83229700  | -0.49970900 | -0.50085000 |
| H  | 7.72663000  | -2.30392700 | -1.45997500 |
| Br | 1.26840100  | -4.05031900 | -1.94901600 |
| O  | 6.52953600  | -3.08083900 | 1.52021200  |
| C  | 6.12939200  | -2.51388800 | 2.74281500  |
| H  | 5.71298700  | -3.31131200 | 3.35970500  |
| H  | 6.98096200  | -2.06763700 | 3.27464500  |
| N  | 4.88441800  | -0.88162000 | 1.30334200  |
| C  | 4.06640900  | 0.18935100  | 1.47765400  |
| C  | 5.10773600  | -1.43343400 | 2.53370700  |
| N  | 4.45985500  | -0.78540000 | 3.45668200  |
| N  | 3.82492900  | 0.21917900  | 2.79607400  |
| C  | 3.08675500  | 1.15785900  | 3.61716100  |
| C  | 3.75474100  | 2.29575800  | 4.07949200  |
| C  | 1.80775500  | 0.79706000  | 4.03019500  |
| C  | 3.05084700  | 3.13550300  | 4.93650200  |
| C  | 1.14902100  | 1.67037500  | 4.89586500  |
| C  | 1.74382800  | 2.84719600  | 5.34242500  |
| H  | 3.53880400  | 4.03402400  | 5.30554900  |
| H  | 0.14569300  | 1.41512600  | 5.22761600  |
| C  | 0.99284700  | 3.79917300  | 6.23607200  |
| H  | 0.49942600  | 4.57322000  | 5.63948200  |
| H  | 0.22122500  | 3.27951200  | 6.80821600  |
| H  | 1.66591800  | 4.30093200  | 6.93508200  |

|   |             |             |             |
|---|-------------|-------------|-------------|
| C | 1.18092100  | -0.49157600 | 3.58231700  |
| H | 1.15180400  | -0.55258400 | 2.49216600  |
| H | 1.74132800  | -1.35179600 | 3.96429100  |
| H | 0.15367300  | -0.56439500 | 3.94593500  |
| C | 5.17363700  | 2.58949000  | 3.67764800  |
| H | 5.81784600  | 1.71914700  | 3.84006800  |
| H | 5.21496000  | 2.85164500  | 2.61744600  |
| H | 5.57166700  | 3.42029100  | 4.26210000  |
| C | 4.40954900  | 2.05062500  | -1.89166000 |
| C | 3.76491600  | 1.10636700  | -0.87326000 |
| H | 4.37642300  | 1.51909500  | -2.84820200 |
| C | 3.75719900  | 1.33339600  | 0.51659700  |
| O | 3.46636600  | 2.38637600  | 1.10969700  |
| C | 3.92302100  | 3.46906600  | -2.16390100 |
| C | 3.93341900  | 3.91588600  | -3.49152100 |
| C | 3.53991500  | 4.37519500  | -1.16901600 |
| C | 3.55737600  | 5.21473500  | -3.82323100 |
| H | 4.22504700  | 3.22632500  | -4.28034000 |
| C | 3.15496900  | 5.67409000  | -1.49929300 |
| H | 3.52709600  | 4.05016900  | -0.13519600 |
| C | 3.15908000  | 6.10136500  | -2.82450600 |
| H | 3.56857900  | 5.53096800  | -4.86191000 |
| H | 2.85421600  | 6.35685500  | -0.70950600 |
| H | 2.85665000  | 7.11286900  | -3.07777300 |
| H | 3.87569600  | 0.06655700  | -1.17169500 |
| H | 5.47788400  | 2.12636900  | -1.64013100 |
| F | -0.93971800 | -6.72352300 | 1.32659700  |

TS4CF-SS

|   |             |             |             |
|---|-------------|-------------|-------------|
| C | -6.20517100 | -1.95232200 | 2.10272500  |
| C | -5.28588200 | -1.21424400 | 1.35121700  |
| C | -4.92911400 | -1.58852500 | 0.06217100  |
| C | -5.55118300 | -2.72343700 | -0.45220000 |
| C | -6.48202600 | -3.46442900 | 0.26872000  |
| C | -6.81033800 | -3.07937700 | 1.56638500  |
| C | -6.40202600 | -1.34098100 | 3.46884400  |
| C | -5.91817900 | 0.09090800  | 3.25074700  |
| C | -4.77848200 | -0.07299300 | 2.21453700  |
| H | -4.21897400 | -1.03716000 | -0.54870700 |
| H | -6.94289400 | -4.33479800 | -0.18430200 |
| H | -7.53409300 | -3.64977500 | 2.14013000  |
| H | -7.43865400 | -1.34985500 | 3.81159700  |
| H | -5.58559300 | 0.60932700  | 4.15925700  |
| H | -3.84174200 | -0.34884800 | 2.71130200  |

|    |             |             |             |
|----|-------------|-------------|-------------|
| H  | -5.78171000 | -1.84534900 | 4.21897700  |
| Br | -5.10077900 | -3.31368600 | -2.19519300 |
| O  | -7.00296300 | 0.77655400  | 2.64668000  |
| C  | -6.73832100 | 2.12371500  | 2.33891800  |
| H  | -7.56296900 | 2.49395800  | 1.73341500  |
| H  | -6.64079000 | 2.72646200  | 3.25307800  |
| N  | -4.55540700 | 1.21625300  | 1.55824800  |
| C  | -3.48515900 | 1.65328800  | 0.88583800  |
| C  | -5.46699600 | 2.23614600  | 1.55825500  |
| N  | -4.99981300 | 3.27822800  | 0.93328400  |
| N  | -3.76369800 | 2.89226400  | 0.51355500  |
| C  | -2.88730300 | 3.86143600  | -0.09306300 |
| C  | -3.10299500 | 4.24499400  | -1.41654700 |
| C  | -1.91294800 | 4.43964200  | 0.72891900  |
| C  | -2.26746100 | 5.24209200  | -1.92879200 |
| C  | -1.12590400 | 5.44303200  | 0.17437100  |
| C  | -1.28613600 | 5.85519600  | -1.15228200 |
| H  | -2.41163200 | 5.55974400  | -2.95877000 |
| H  | -0.38537100 | 5.92776600  | 0.80467300  |
| C  | -0.41584000 | 6.94324900  | -1.72796200 |
| H  | -0.07462100 | 7.62858400  | -0.94768700 |
| H  | 0.47228700  | 6.52088400  | -2.21125500 |
| H  | -0.95434000 | 7.52101600  | -2.48230900 |
| C  | -1.72572700 | 4.00358500  | 2.15610800  |
| H  | -2.68116100 | 3.94691100  | 2.68710400  |
| H  | -1.25208000 | 3.01778200  | 2.18186500  |
| H  | -1.08036200 | 4.70672900  | 2.68517200  |
| C  | -4.19787600 | 3.65870400  | -2.26641200 |
| H  | -4.61899300 | 2.74324400  | -1.85189100 |
| H  | -5.01695500 | 4.37747400  | -2.37108900 |
| H  | -3.81657500 | 3.44865200  | -3.27006400 |
| H  | -2.53330400 | 1.14868800  | 0.72809600  |
| B  | -6.79322700 | 1.02838600  | -1.37538900 |
| F  | -5.42940200 | 1.01789200  | -0.98166800 |
| F  | -6.91958400 | 1.82524000  | -2.51370700 |
| F  | -7.54707500 | 1.57081900  | -0.32288100 |
| F  | -7.20159600 | -0.27754200 | -1.63412700 |
| N  | -2.66845000 | -0.92998100 | -2.74434500 |
| C  | -1.43889100 | -1.69640700 | -2.92359000 |
| C  | -1.64364800 | -3.20505700 | -2.87113300 |
| H  | -0.75632200 | -1.42032200 | -2.11635000 |
| H  | -0.92805400 | -1.42586600 | -3.86862500 |
| H  | -0.68423400 | -3.71339400 | -3.00988200 |
| H  | -2.05388700 | -3.48965700 | -1.89911800 |

|   |             |             |             |
|---|-------------|-------------|-------------|
| H | -2.33560800 | -3.55824000 | -3.64159700 |
| C | -3.42127000 | -0.83990200 | -3.99068800 |
| C | -4.74927800 | -0.11141500 | -3.84922500 |
| H | -3.61781100 | -1.86624700 | -4.32370300 |
| H | -2.81541800 | -0.36882500 | -4.78998700 |
| H | -5.31297600 | -0.19060800 | -4.78381600 |
| H | -5.34757100 | -0.54310900 | -3.04396200 |
| H | -4.62327000 | 0.95192100  | -3.62912900 |
| C | -2.42075300 | 0.35933000  | -2.10125000 |
| C | -1.52281600 | 1.34026300  | -2.86072300 |
| H | -1.95747100 | 0.13648700  | -1.13406700 |
| H | -3.38914400 | 0.82301000  | -1.88773500 |
| H | -1.38327100 | 2.24991400  | -2.26718500 |
| H | -0.53287100 | 0.90525900  | -3.04470700 |
| H | -1.95665700 | 1.62245300  | -3.82608300 |
| C | 1.57487700  | -0.95849700 | -0.86124000 |
| C | 0.50872700  | -0.39917800 | -0.13697800 |
| H | 2.01578800  | -0.26246200 | -1.57541500 |
| C | 0.32559300  | 1.03226800  | -0.16774400 |
| H | 1.07238700  | 1.58112200  | -0.77259200 |
| O | -0.60159700 | 1.64656400  | 0.36193500  |
| C | 1.63556200  | -2.36033000 | -1.34746700 |
| C | 2.05154100  | -2.58199800 | -2.66898600 |
| C | 1.28908600  | -3.46886500 | -0.56246900 |
| C | 2.14529400  | -3.87014800 | -3.18797500 |
| H | 2.27893400  | -1.72816600 | -3.30480600 |
| C | 1.38304400  | -4.75627800 | -1.08266100 |
| H | 0.94778000  | -3.32224400 | 0.45532000  |
| C | 1.81727000  | -4.96449400 | -2.39090200 |
| H | 2.46527900  | -4.01590400 | -4.21475800 |
| H | 1.11584900  | -5.60331000 | -0.45921400 |
| H | 1.89013700  | -5.97132600 | -2.78826600 |
| C | -0.43799300 | -1.17238600 | 0.59295100  |
| C | -1.26424800 | -1.83089900 | 1.19593200  |
| C | -2.17308500 | -2.64071400 | 1.95094900  |
| C | -2.35509200 | -2.40477900 | 3.32278200  |
| C | -2.89760300 | -3.67373600 | 1.33265200  |
| C | -3.26339200 | -3.15856800 | 4.05797400  |
| H | -1.78164800 | -1.62050200 | 3.80644200  |
| C | -3.79030400 | -4.44539000 | 2.06222900  |
| H | -2.79054400 | -3.84073800 | 0.26550100  |
| C | -3.96913300 | -4.16025400 | 3.40818700  |
| H | -3.42572600 | -2.98526100 | 5.11595000  |
| H | -4.37437200 | -5.23131700 | 1.59801300  |

|    |            |             |             |
|----|------------|-------------|-------------|
| C  | 6.88238400 | -2.33987900 | -2.34474200 |
| C  | 6.25161400 | -1.49424400 | -1.42972700 |
| C  | 6.67638700 | -1.39068300 | -0.11292600 |
| C  | 7.75203100 | -2.19007200 | 0.26971700  |
| C  | 8.38231100 | -3.05847100 | -0.61636900 |
| C  | 7.94657600 | -3.13228100 | -1.93912900 |
| C  | 6.25212800 | -2.20304900 | -3.71167000 |
| C  | 5.54707200 | -0.84847100 | -3.61474900 |
| C  | 5.10398800 | -0.79938400 | -2.13431500 |
| H  | 6.20215700 | -0.72404900 | 0.60252100  |
| H  | 9.21629500 | -3.66123000 | -0.27645400 |
| H  | 8.44919500 | -3.79177800 | -2.63894500 |
| H  | 6.97199400 | -2.20774500 | -4.53227400 |
| H  | 4.70439900 | -0.72710600 | -4.30731300 |
| H  | 4.17160200 | -1.36010600 | -2.02189000 |
| H  | 5.51541600 | -2.99454700 | -3.88957900 |
| Br | 8.38466700 | -2.08669700 | 2.05276800  |
| O  | 6.52980600 | 0.14730300  | -3.84429700 |
| C  | 6.01751400 | 1.45464800  | -3.75397100 |
| H  | 6.85020800 | 2.15255200  | -3.84407000 |
| H  | 5.29694800 | 1.65663600  | -4.55890900 |
| N  | 4.85455000 | 0.58467400  | -1.72075000 |
| C  | 4.18788200 | 1.08468100  | -0.64999600 |
| C  | 5.32743700 | 1.65149200  | -2.43716500 |
| N  | 5.01023100 | 2.77513000  | -1.86542200 |
| N  | 4.30459000 | 2.41056700  | -0.76073300 |
| C  | 3.82363600 | 3.45984500  | 0.10366700  |
| C  | 2.84237200 | 4.30864500  | -0.40037600 |
| C  | 4.41101800 | 3.61599600  | 1.36502100  |
| C  | 2.45997000 | 5.38270300  | 0.40564700  |
| C  | 3.97819400 | 4.69240900  | 2.13133000  |
| C  | 3.00747800 | 5.58746600  | 1.66805700  |
| H  | 1.71354500 | 6.07378800  | 0.02345100  |
| H  | 4.41216400 | 4.83985000  | 3.11710600  |
| C  | 2.54481900 | 6.72938000  | 2.53455900  |
| H  | 1.86151000 | 6.36864900  | 3.31015900  |
| H  | 3.38710300 | 7.21006000  | 3.03816200  |
| H  | 2.01657200 | 7.48335100  | 1.94660700  |
| C  | 5.43369500 | 2.64548100  | 1.89284500  |
| H  | 4.94032800 | 1.73093300  | 2.24445800  |
| H  | 6.16653200 | 2.36751300  | 1.12874500  |
| H  | 5.97235600 | 3.08262700  | 2.73501500  |
| C  | 2.18579200 | 4.10773000  | -1.74207600 |
| H  | 2.35158700 | 3.10621300  | -2.14410000 |



|   |             |             |             |
|---|-------------|-------------|-------------|
| H | 1.10562000  | 4.25722000  | -1.64508200 |
| H | 2.56675700  | 4.82481700  | -2.47586000 |
| C | 2.79048100  | -1.58136900 | 1.77081600  |
| C | 3.30436800  | -0.99270200 | 0.47578500  |
| H | 2.83772000  | -2.67281100 | 1.71251400  |
| C | 3.38780400  | 0.40986200  | 0.43726500  |
| O | 2.69993500  | 1.16514800  | 1.14531100  |
| C | 3.60437000  | -1.08822200 | 2.95228700  |
| C | 4.91701900  | -1.52726900 | 3.15316400  |
| C | 3.07516300  | -0.13607300 | 3.82666800  |
| C | 5.67996400  | -1.02848900 | 4.20661100  |
| H | 5.34961200  | -2.26460200 | 2.47821200  |
| C | 3.83438500  | 0.36218000  | 4.88325400  |
| H | 2.06653400  | 0.22808300  | 3.65703000  |
| C | 5.14008500  | -0.08264200 | 5.07630000  |
| H | 6.69741900  | -1.37895500 | 4.34480500  |
| H | 3.40707200  | 1.10382800  | 5.55112500  |
| H | 5.73474500  | 0.30540300  | 5.89717800  |
| H | 4.02081000  | -1.59570800 | -0.06678300 |
| H | 1.74370700  | -1.29362700 | 1.91771500  |
| F | -4.87259500 | -4.86920500 | 4.10506800  |

TS4CF-RR

|    |             |             |             |
|----|-------------|-------------|-------------|
| C  | -0.85838500 | -4.34042200 | 0.96846200  |
| C  | -1.31145200 | -3.03387700 | 0.78107400  |
| C  | -1.14622800 | -2.37262100 | -0.43067400 |
| C  | -0.49963100 | -3.06915300 | -1.44750400 |
| C  | -0.05708000 | -4.38177700 | -1.29004200 |
| C  | -0.23520400 | -5.02400000 | -0.06836200 |
| C  | -1.12144800 | -4.81819500 | 2.37485200  |
| C  | -2.08728900 | -3.77398800 | 2.94564100  |
| C  | -1.82743100 | -2.49969100 | 2.09792000  |
| H  | -1.50711200 | -1.36492500 | -0.62375500 |
| H  | 0.42094200  | -4.89201700 | -2.11977500 |
| H  | 0.10421000  | -6.04632000 | 0.06391700  |
| H  | -1.58376000 | -5.80736500 | 2.41708600  |
| H  | -1.93458300 | -3.57920600 | 4.01552400  |
| H  | -1.06311000 | -1.86321500 | 2.55576400  |
| H  | -0.19682100 | -4.86045300 | 2.96049400  |
| Br | -0.17295200 | -2.19148100 | -3.08638300 |
| O  | -3.40066600 | -4.25539700 | 2.73259400  |
| C  | -4.38015200 | -3.38829600 | 3.25778500  |
| H  | -5.35686900 | -3.80125000 | 3.01803300  |
| H  | -4.26501000 | -3.27593900 | 4.34540100  |

|   |             |             |             |
|---|-------------|-------------|-------------|
| N | -3.04596300 | -1.68970000 | 2.03998600  |
| C | -3.23402200 | -0.48816700 | 1.48747900  |
| C | -4.24316300 | -2.05708600 | 2.59129900  |
| N | -5.13269100 | -1.11835300 | 2.44886300  |
| N | -4.48376400 | -0.14788300 | 1.74964400  |
| C | -5.12299000 | 1.10384200  | 1.45795100  |
| C | -6.32132000 | 1.07429000  | 0.73472400  |
| C | -4.54752500 | 2.27795300  | 1.95531500  |
| C | -6.94893700 | 2.29669000  | 0.50605900  |
| C | -5.22934100 | 3.46893200  | 1.70315400  |
| C | -6.42119400 | 3.49944200  | 0.98231400  |
| H | -7.87488500 | 2.30717100  | -0.06436100 |
| H | -4.81305900 | 4.39621400  | 2.08532400  |
| C | -7.13357500 | 4.79984300  | 0.71776800  |
| H | -8.16075500 | 4.76380900  | 1.09175700  |
| H | -6.62003500 | 5.63781700  | 1.19344500  |
| H | -7.18176800 | 5.00548700  | -0.35602700 |
| C | -3.26542400 | 2.28393600  | 2.74955900  |
| H | -3.27129800 | 1.51108800  | 3.52539500  |
| H | -2.38448700 | 2.10751300  | 2.12123600  |
| H | -3.13850300 | 3.25292700  | 3.23560600  |
| C | -6.89317300 | -0.21321800 | 0.20666400  |
| H | -6.12081100 | -0.86649800 | -0.20554300 |
| H | -7.38620800 | -0.77810100 | 1.00320300  |
| H | -7.62742500 | -0.00503300 | -0.57412400 |
| H | -2.48986600 | 0.12032500  | 0.98981800  |
| B | -5.39668200 | -3.48486500 | -0.34362300 |
| F | -4.42950500 | -2.47187900 | -0.13335600 |
| F | -6.42821900 | -2.95885500 | -1.13411600 |
| F | -5.91813600 | -3.87439100 | 0.89964500  |
| F | -4.80456800 | -4.56901700 | -0.98074400 |
| N | -2.89955300 | -0.24648600 | -2.92491000 |
| C | -2.04888500 | 0.78399600  | -3.50531000 |
| C | -2.60570600 | 1.65124600  | -4.64440300 |
| H | -1.14456500 | 0.28285400  | -3.87705600 |
| H | -1.71302600 | 1.42823700  | -2.68547300 |
| H | -1.78811200 | 2.23216600  | -5.08236700 |
| H | -3.04017900 | 1.03837800  | -5.43989000 |
| H | -3.36806400 | 2.35974400  | -4.30963800 |
| C | -3.38863100 | -1.20762000 | -3.90373000 |
| C | -3.89337400 | -2.48898500 | -3.25582100 |
| H | -2.54419500 | -1.44383800 | -4.56273800 |
| H | -4.17938400 | -0.78527700 | -4.55016800 |
| H | -4.12829400 | -3.23077700 | -4.02520400 |

|   |             |             |             |
|---|-------------|-------------|-------------|
| H | -3.12959400 | -2.90254700 | -2.59176600 |
| H | -4.79404700 | -2.32879800 | -2.65944100 |
| C | -3.90702300 | 0.21886100  | -1.97671700 |
| C | -5.19745700 | 0.80277500  | -2.57196500 |
| H | -3.41907600 | 0.96531300  | -1.33366700 |
| H | -4.17379100 | -0.62420100 | -1.32758000 |
| H | -5.77886600 | 1.30402000  | -1.79332600 |
| H | -4.99551800 | 1.53360500  | -3.35926800 |
| H | -5.82257700 | 0.01321100  | -3.00179800 |
| C | 1.43364500  | 0.64736200  | -1.10181100 |
| C | 0.38863800  | 0.92666100  | -0.19221900 |
| H | 1.86704100  | -0.34283000 | -0.95462300 |
| C | 0.31082600  | 0.12432400  | 0.99869300  |
| H | 1.10151100  | -0.64863300 | 1.07888600  |
| O | -0.56162400 | 0.19045300  | 1.87146600  |
| C | 1.47596700  | 1.04909600  | -2.53156400 |
| C | 2.15233800  | 0.20982200  | -3.42893000 |
| C | 0.88029600  | 2.21416800  | -3.03496200 |
| C | 2.21520800  | 0.50819400  | -4.78528500 |
| H | 2.60244100  | -0.70784400 | -3.06098800 |
| C | 0.95701100  | 2.52096600  | -4.39082700 |
| H | 0.35140000  | 2.88316800  | -2.36681100 |
| C | 1.61541100  | 1.66776500  | -5.27319200 |
| H | 2.72979200  | -0.16768200 | -5.46072600 |
| H | 0.49310400  | 3.43118500  | -4.75794200 |
| H | 1.66393700  | 1.90591200  | -6.33080600 |
| C | -0.57017900 | 1.97218700  | -0.30231800 |
| C | -1.43434600 | 2.82926400  | -0.33409400 |
| C | -2.41748600 | 3.87016100  | -0.42139200 |
| C | -3.42746700 | 3.81570800  | -1.39579200 |
| C | -2.36919400 | 4.96945800  | 0.45027100  |
| C | -4.37306300 | 4.82735900  | -1.49628100 |
| H | -3.46482600 | 2.97309300  | -2.07750800 |
| C | -3.30575600 | 5.99205300  | 0.35316200  |
| H | -1.58681000 | 5.01639700  | 1.20038300  |
| C | -4.29194800 | 5.89807000  | -0.61801300 |
| H | -5.16125900 | 4.79763000  | -2.24060200 |
| H | -3.28389300 | 6.85102200  | 1.01426700  |
| C | 6.98543900  | -0.84428300 | -1.72592900 |
| C | 5.86983200  | -0.49151700 | -0.97071000 |
| C | 4.68943200  | -1.20491700 | -1.02946700 |
| C | 4.62595700  | -2.28636500 | -1.89837400 |
| C | 5.70469700  | -2.63746500 | -2.70348300 |
| C | 6.89776400  | -1.91145900 | -2.61228700 |

|    |             |             |             |
|----|-------------|-------------|-------------|
| C  | 8.15848900  | 0.02604200  | -1.32650000 |
| C  | 7.75440900  | 0.49625900  | 0.08088700  |
| C  | 6.21465500  | 0.64250100  | -0.03404700 |
| H  | 3.83670900  | -0.96191900 | -0.40592200 |
| H  | 5.62839900  | -3.48472600 | -3.37509700 |
| H  | 7.75253900  | -2.21001600 | -3.21030400 |
| H  | 9.11023100  | -0.50721000 | -1.29091100 |
| H  | 8.23965100  | 1.42344100  | 0.40716400  |
| H  | 5.94685700  | 1.63139200  | -0.42118700 |
| H  | 8.26756600  | 0.88616900  | -1.99539400 |
| Br | 2.99858400  | -3.25330700 | -1.90902100 |
| O  | 8.07631600  | -0.57255000 | 0.95732100  |
| C  | 7.65408500  | -0.36001200 | 2.28513100  |
| H  | 7.92236500  | -1.23861800 | 2.87133100  |
| H  | 8.13884600  | 0.52432000  | 2.72127300  |
| N  | 5.54894000  | 0.45264800  | 1.25744600  |
| C  | 4.22993500  | 0.53879000  | 1.55838400  |
| C  | 6.16916500  | -0.16655600 | 2.30752700  |
| N  | 5.31391200  | -0.47827800 | 3.23741000  |
| N  | 4.11836600  | -0.03726500 | 2.75915700  |
| C  | 2.91090600  | -0.38078800 | 3.46736300  |
| C  | 2.43792800  | 0.49587600  | 4.44413000  |
| C  | 2.31710600  | -1.60869500 | 3.16824900  |
| C  | 1.26931500  | 0.13208300  | 5.10669300  |
| C  | 1.16320700  | -1.93276100 | 3.88145800  |
| C  | 0.61231000  | -1.06736500 | 4.82670000  |
| H  | 0.86209300  | 0.80180400  | 5.85917600  |
| H  | 0.68978600  | -2.89405000 | 3.69450800  |
| C  | -0.68001300 | -1.41222900 | 5.51762800  |
| H  | -0.79732800 | -0.85114700 | 6.44665000  |
| H  | -1.53227100 | -1.16105800 | 4.87335700  |
| H  | -0.73550100 | -2.47911400 | 5.75039600  |
| C  | 2.87557600  | -2.55097700 | 2.12956400  |
| H  | 2.52900400  | -2.30590900 | 1.11667300  |
| H  | 3.96916700  | -2.54675700 | 2.11766100  |
| H  | 2.54335100  | -3.57101300 | 2.33348600  |
| C  | 3.16533000  | 1.77597400  | 4.74511600  |
| H  | 4.20116700  | 1.57795300  | 5.03761700  |
| H  | 3.17746500  | 2.41010500  | 3.85393500  |
| H  | 2.67517900  | 2.31480100  | 5.55698500  |
| C  | 2.79102700  | 3.16799000  | -0.75825900 |
| C  | 3.17484200  | 1.72888200  | -0.45707300 |
| H  | 1.78963800  | 3.36731900  | -0.36156800 |
| C  | 3.16066300  | 1.40525400  | 0.91914700  |

|   |             |            |             |
|---|-------------|------------|-------------|
| O | 2.30264900  | 1.82690900 | 1.71208400  |
| C | 3.79756300  | 4.10569200 | -0.12756500 |
| C | 5.01627300  | 4.36637200 | -0.76355800 |
| C | 3.56273800  | 4.66894900 | 1.13045700  |
| C | 5.98301700  | 5.16309400 | -0.15485300 |
| H | 5.20274100  | 3.94267900 | -1.74869900 |
| C | 4.52782600  | 5.46792000 | 1.74077300  |
| H | 2.62041300  | 4.46502100 | 1.63040600  |
| C | 5.74135800  | 5.71513600 | 1.10250500  |
| H | 6.92109900  | 5.36007200 | -0.66469000 |
| H | 4.32987600  | 5.90033200 | 2.71681000  |
| H | 6.49138700  | 6.33918800 | 1.57755900  |
| H | 3.94962100  | 1.30875200 | -1.09124300 |
| H | 2.76879000  | 3.32250200 | -1.83879800 |
| F | -5.20743700 | 6.87874300 | -0.70683600 |

TS4CF-SR

|    |            |             |             |
|----|------------|-------------|-------------|
| C  | 1.55732000 | -4.57397200 | 0.56878500  |
| C  | 1.90080600 | -3.24884400 | 0.29690400  |
| C  | 2.14845000 | -2.32948300 | 1.30929600  |
| C  | 2.04635100 | -2.79560200 | 2.61693500  |
| C  | 1.68342400 | -4.10632800 | 2.91532700  |
| C  | 1.43355300 | -5.00666500 | 1.88192000  |
| C  | 1.37888900 | -5.35707000 | -0.71146100 |
| C  | 2.10340000 | -4.49706000 | -1.75267800 |
| C  | 1.92850400 | -3.06075400 | -1.20447600 |
| H  | 2.47150800 | -1.30796000 | 1.12730500  |
| H  | 1.62136700 | -4.42284200 | 3.95007400  |
| H  | 1.17075900 | -6.03498500 | 2.10828200  |
| H  | 1.81090400 | -6.35949800 | -0.67754100 |
| H  | 1.69803900 | -4.59236700 | -2.76917500 |
| H  | 0.99529300 | -2.64374800 | -1.58854600 |
| H  | 0.31764000 | -5.44961300 | -0.97071800 |
| Br | 2.46840100 | -1.62891300 | 4.04837200  |
| O  | 3.46719300 | -4.86813000 | -1.73614500 |
| C  | 4.25857000 | -4.12543000 | -2.63465700 |
| H  | 5.29530600 | -4.41704800 | -2.48206900 |
| H  | 3.96074200 | -4.31927500 | -3.67501500 |
| N  | 3.00189200 | -2.20356500 | -1.69975000 |
| C  | 3.13290000 | -0.87955900 | -1.60053900 |
| C  | 4.11519000 | -2.66241900 | -2.34590600 |
| N  | 4.89282200 | -1.67511800 | -2.68917500 |
| N  | 4.26426900 | -0.56734100 | -2.20812600 |
| C  | 4.79902100 | 0.74765400  | -2.42768700 |

|   |            |             |             |
|---|------------|-------------|-------------|
| C | 6.11276500 | 1.01114600  | -2.01850400 |
| C | 3.98938900 | 1.69186500  | -3.07170500 |
| C | 6.60968400 | 2.28756800  | -2.27810500 |
| C | 4.54336300 | 2.95254400  | -3.29759400 |
| C | 5.84289500 | 3.27066300  | -2.90435300 |
| H | 7.62206100 | 2.52319200  | -1.96014800 |
| H | 3.94479200 | 3.70063000  | -3.81256800 |
| C | 6.38826400 | 4.65942400  | -3.10519600 |
| H | 7.46289300 | 4.64005200  | -3.29879900 |
| H | 5.89248100 | 5.16446600  | -3.93725200 |
| H | 6.22550300 | 5.26110000  | -2.20431000 |
| C | 2.58387000 | 1.38557200  | -3.52880200 |
| H | 2.51832100 | 0.40694600  | -4.01364600 |
| H | 1.86517600 | 1.37865100  | -2.69961800 |
| H | 2.25758100 | 2.14059100  | -4.24745700 |
| C | 6.95787600 | -0.01048700 | -1.30673700 |
| H | 6.37718300 | -0.58905500 | -0.58570800 |
| H | 7.38887000 | -0.72168800 | -2.01765100 |
| H | 7.77667500 | 0.48890000  | -0.78487500 |
| H | 2.43986800 | -0.19117400 | -1.13693100 |
| B | 5.59932600 | -2.81425000 | 0.74623400  |
| F | 4.80393300 | -1.72119900 | 0.31166600  |
| F | 6.89911200 | -2.35620000 | 0.97309000  |
| F | 5.61160700 | -3.77877000 | -0.27219100 |
| F | 5.04962400 | -3.34640400 | 1.90906400  |
| N | 3.64280600 | 1.09046300  | 2.37074100  |
| C | 2.55848600 | 1.85770700  | 2.97381100  |
| C | 2.91493000 | 3.16370200  | 3.69772500  |
| H | 2.05466200 | 1.20051700  | 3.69776200  |
| H | 1.82471900 | 2.06165800  | 2.18751800  |
| H | 1.99790200 | 3.61489200  | 4.09305500  |
| H | 3.58077900 | 2.98120400  | 4.54629600  |
| H | 3.39604400 | 3.89302300  | 3.04076200  |
| C | 4.77278600 | 0.90865200  | 3.27039000  |
| C | 5.70286400 | -0.21982900 | 2.85290100  |
| H | 4.35051600 | 0.66716500  | 4.25564900  |
| H | 5.35221100 | 1.84027500  | 3.40797700  |
| H | 6.50321900 | -0.33069400 | 3.59137900  |
| H | 5.15549800 | -1.16187600 | 2.78152500  |
| H | 6.17232100 | -0.03944700 | 1.88292500  |
| C | 3.97966500 | 1.43570600  | 0.99513400  |
| C | 4.70171700 | 2.76501900  | 0.74607400  |
| H | 3.03601200 | 1.44890000  | 0.43368600  |
| H | 4.57612000 | 0.61108600  | 0.58430100  |

|   |             |             |             |
|---|-------------|-------------|-------------|
| H | 4.86061100  | 2.90029600  | -0.32851200 |
| H | 4.11048400  | 3.61546100  | 1.09745100  |
| H | 5.67999000  | 2.79234600  | 1.23850500  |
| C | -0.96459700 | -0.12211900 | 1.39850600  |
| C | -0.29002400 | 0.24301200  | 0.21896000  |
| H | -1.15172000 | -1.19245400 | 1.50686500  |
| C | -0.24819800 | -0.71795500 | -0.84309000 |
| H | -0.69512600 | -1.70162500 | -0.58135000 |
| O | 0.21920000  | -0.53783900 | -1.97586300 |
| C | -0.85643400 | 0.62435200  | 2.66360000  |
| C | -0.59391000 | -0.10015000 | 3.83056600  |
| C | -0.99965100 | 2.01812900  | 2.74434900  |
| C | -0.42051100 | 0.55571000  | 5.04722800  |
| H | -0.47404600 | -1.17821900 | 3.77366200  |
| C | -0.84884300 | 2.66786000  | 3.96216900  |
| H | -1.24046700 | 2.59131400  | 1.85380500  |
| C | -0.54784200 | 1.93907800  | 5.11597600  |
| H | -0.18654600 | -0.01918800 | 5.93739100  |
| H | -0.96932600 | 3.74550100  | 4.01621000  |
| H | -0.42010800 | 2.45233800  | 6.06347900  |
| C | 0.30363700  | 1.51485300  | 0.00532200  |
| C | 0.79724000  | 2.61476500  | -0.15566000 |
| C | 1.45618000  | 3.88213800  | -0.18963800 |
| C | 2.12199300  | 4.32173000  | -1.34244300 |
| C | 1.48107800  | 4.67900400  | 0.96759200  |
| C | 2.82888600  | 5.51693200  | -1.33733400 |
| H | 2.09024300  | 3.71245700  | -2.23844000 |
| C | 2.17827600  | 5.87973900  | 0.97930000  |
| H | 0.96730800  | 4.33543600  | 1.86087800  |
| C | 2.84711600  | 6.27161200  | -0.17296000 |
| H | 3.36209800  | 5.86826900  | -2.21405900 |
| H | 2.22012900  | 6.50495700  | 1.86379200  |
| C | -3.75547000 | 4.10848800  | -1.13730800 |
| C | -3.97007200 | 2.74627600  | -0.91552300 |
| C | -5.19351800 | 2.25711800  | -0.48108700 |
| C | -6.20202300 | 3.18876600  | -0.24451000 |
| C | -6.00923900 | 4.55306500  | -0.43859900 |
| C | -4.77502800 | 5.01830400  | -0.89436300 |
| C | -2.35279100 | 4.34450300  | -1.65277000 |
| C | -1.94838100 | 2.96178400  | -2.16800000 |
| C | -2.67670300 | 2.00916700  | -1.19141000 |
| H | -5.37435100 | 1.19796300  | -0.31808000 |
| H | -6.82133200 | 5.24422700  | -0.24546100 |
| H | -4.62741000 | 6.07960000  | -1.06562000 |

|    |             |             |             |
|----|-------------|-------------|-------------|
| H  | -2.29532800 | 5.08899000  | -2.44925300 |
| H  | -0.86751500 | 2.77904200  | -2.18432400 |
| H  | -2.08160000 | 1.90158800  | -0.28261600 |
| H  | -1.67641800 | 4.64899300  | -0.84481100 |
| Br | -7.88730100 | 2.57142700  | 0.36446200  |
| O  | -2.49920500 | 2.81909200  | -3.46832600 |
| C  | -2.20143500 | 1.56623400  | -4.03571500 |
| H  | -2.69823400 | 1.50010100  | -5.00374000 |
| H  | -1.11812000 | 1.43914500  | -4.17664400 |
| N  | -2.82687500 | 0.68034000  | -1.78952600 |
| C  | -3.15434100 | -0.50999100 | -1.23383200 |
| C  | -2.68622200 | 0.47181000  | -3.13469200 |
| N  | -2.95360900 | -0.76251200 | -3.44706400 |
| N  | -3.24055700 | -1.35974100 | -2.26272400 |
| C  | -3.67898500 | -2.73150800 | -2.26249100 |
| C  | -2.80049700 | -3.69897900 | -2.74783600 |
| C  | -4.97335600 | -3.01891600 | -1.81107400 |
| C  | -3.25026900 | -5.02070300 | -2.75094700 |
| C  | -5.36885800 | -4.35230600 | -1.84197900 |
| C  | -4.52196200 | -5.36581900 | -2.29939400 |
| H  | -2.58284400 | -5.79710200 | -3.11638600 |
| H  | -6.36801700 | -4.60706700 | -1.49722700 |
| C  | -4.97745700 | -6.80149900 | -2.28400700 |
| H  | -4.33099300 | -7.42920000 | -2.90025300 |
| H  | -4.96005600 | -7.19873300 | -1.26433000 |
| H  | -6.00231000 | -6.89202100 | -2.65261300 |
| C  | -5.90723100 | -1.95744500 | -1.29085900 |
| H  | -5.67661000 | -1.71182500 | -0.24655200 |
| H  | -5.85393500 | -1.03871500 | -1.88396700 |
| H  | -6.93696800 | -2.31759200 | -1.32018400 |
| C  | -1.42750800 | -3.36113300 | -3.26900400 |
| H  | -1.46909300 | -3.13397300 | -4.33876100 |
| H  | -0.98982900 | -2.48636900 | -2.77994100 |
| H  | -0.76098000 | -4.21687600 | -3.13668700 |
| C  | -3.70585300 | -0.49657800 | 2.58593600  |
| C  | -3.25607100 | -0.00313200 | 1.23057800  |
| H  | -3.65252900 | 0.32277300  | 3.30956000  |
| C  | -3.22373400 | -0.95975600 | 0.20855600  |
| O  | -3.10527000 | -2.18828400 | 0.37541200  |
| C  | -5.11893700 | -1.03694100 | 2.47543000  |
| C  | -5.35852800 | -2.41260400 | 2.49716800  |
| C  | -6.19489000 | -0.17171300 | 2.24188700  |
| C  | -6.64380400 | -2.91568500 | 2.29831200  |
| H  | -4.52457700 | -3.09039000 | 2.65080200  |



|   |             |             |             |
|---|-------------|-------------|-------------|
| C | -7.47834500 | -0.67142600 | 2.03997000  |
| H | -6.02551000 | 0.90362500  | 2.20470600  |
| C | -7.70728900 | -2.04712800 | 2.06889500  |
| H | -6.81020400 | -3.98845000 | 2.31505400  |
| H | -8.29796900 | 0.01521900  | 1.85414800  |
| H | -8.70765900 | -2.43688500 | 1.90968800  |
| H | -3.45053300 | 1.03696900  | 1.00228400  |
| H | -3.04207600 | -1.29307000 | 2.94224100  |
| F | 3.53101700  | 7.42591400  | -0.16188000 |

R2Me

|   |             |             |             |
|---|-------------|-------------|-------------|
| C | -2.81332700 | 1.26049600  | -0.00118100 |
| C | -1.60289600 | 1.87317000  | -0.00548600 |
| H | -3.67044700 | 1.93342200  | -0.02799000 |
| C | -1.61349000 | 3.35958200  | -0.02932000 |
| H | -2.62755000 | 3.80552800  | -0.03946000 |
| O | -0.62106200 | 4.05122900  | -0.03683400 |
| C | -3.16762700 | -0.15416300 | 0.02387300  |
| C | -4.52830600 | -0.48114300 | -0.10595300 |
| C | -2.23734700 | -1.19662600 | 0.17685500  |
| C | -4.94963700 | -1.80435100 | -0.09798200 |
| H | -5.25600000 | 0.31790500  | -0.21715400 |
| C | -2.66299300 | -2.51879600 | 0.18901100  |
| H | -1.18574400 | -0.96846000 | 0.29440800  |
| C | -4.01564800 | -2.82825400 | 0.04867300  |
| H | -6.00389800 | -2.03710200 | -0.20318500 |
| H | -1.93487000 | -3.31402700 | 0.31063900  |
| H | -4.34022800 | -3.86360100 | 0.05749100  |
| C | -0.31992100 | 1.25479800  | -0.00361500 |
| C | 0.80746200  | 0.80703000  | -0.01158500 |
| C | 2.12351200  | 0.24653100  | -0.01778600 |
| C | 2.30751600  | -1.13400000 | -0.18657500 |
| C | 3.24741000  | 1.07013200  | 0.14173700  |
| C | 3.58746000  | -1.67099200 | -0.19132100 |
| H | 1.44206900  | -1.77527200 | -0.32019400 |
| C | 4.52150900  | 0.51861400  | 0.13491600  |
| H | 3.10933600  | 2.13887800  | 0.26676200  |
| C | 4.71358600  | -0.85731700 | -0.02773000 |
| H | 3.71830900  | -2.74096500 | -0.32661400 |
| H | 5.38507000  | 1.16646300  | 0.25620900  |
| C | 6.09680000  | -1.45248000 | -0.00209300 |
| H | 6.37241100  | -1.74297800 | 1.01707600  |
| H | 6.84220400  | -0.73581700 | -0.35377000 |
| H | 6.15346700  | -2.34719400 | -0.62617300 |

## TS4CMe-RS

|    |             |             |             |
|----|-------------|-------------|-------------|
| C  | -3.68056000 | -1.39363400 | 3.39901900  |
| C  | -3.40022500 | -0.79114200 | 2.16959200  |
| C  | -3.74567200 | -1.38451800 | 0.96718100  |
| C  | -4.39801000 | -2.61208100 | 1.03779700  |
| C  | -4.68458200 | -3.23988600 | 2.24390100  |
| C  | -4.31996100 | -2.62393200 | 3.44220600  |
| C  | -3.19499000 | -0.52733800 | 4.54015100  |
| C  | -3.02940600 | 0.84144300  | 3.87408000  |
| C  | -2.63399300 | 0.48466700  | 2.42405700  |
| H  | -3.55185800 | -0.92472200 | 0.00254600  |
| H  | -5.19342500 | -4.19696500 | 2.24584900  |
| H  | -4.54864400 | -3.10176000 | 4.38961600  |
| H  | -3.89637600 | -0.46492900 | 5.37495500  |
| H  | -2.28970300 | 1.49925600  | 4.34994800  |
| H  | -1.55050100 | 0.33482900  | 2.34003200  |
| H  | -2.23288500 | -0.88179900 | 4.92786600  |
| Br | -4.89111800 | -3.46507500 | -0.57915100 |
| O  | -4.31430300 | 1.44071300  | 3.88223600  |
| C  | -4.38402200 | 2.70578100  | 3.26987900  |
| H  | -5.43868900 | 2.94827700  | 3.14568800  |
| H  | -3.89717000 | 3.47351500  | 3.88748100  |
| N  | -2.94128900 | 1.62393200  | 1.56401300  |
| C  | -2.39852600 | 1.93656600  | 0.39050500  |
| C  | -3.71863600 | 2.68511700  | 1.92874400  |
| N  | -3.66298700 | 3.63763500  | 1.03808900  |
| N  | -2.83189800 | 3.14410000  | 0.07612800  |
| C  | -2.29253600 | 3.95765500  | -0.98494100 |
| C  | -2.79667900 | 3.84537300  | -2.27993000 |
| C  | -1.22611100 | 4.80793100  | -0.64665400 |
| C  | -2.11987400 | 4.54456400  | -3.28572800 |
| C  | -0.59232000 | 5.47904600  | -1.68684200 |
| C  | -1.00935000 | 5.33798900  | -3.01546000 |
| H  | -2.48117600 | 4.45732100  | -4.30760400 |
| H  | 0.24954500  | 6.12795900  | -1.45884900 |
| C  | -0.26411900 | 6.03420300  | -4.12330400 |
| H  | -0.00524700 | 7.05778100  | -3.83958600 |
| H  | 0.67416200  | 5.51186300  | -4.33826100 |
| H  | -0.85572700 | 6.06572400  | -5.04031500 |
| C  | -0.83131600 | 5.05789200  | 0.78682400  |
| H  | -1.52661500 | 5.77227100  | 1.23948900  |
| H  | -0.84398000 | 4.15348400  | 1.40047100  |
| H  | 0.17160100  | 5.48891500  | 0.83012700  |

|   |             |             |             |
|---|-------------|-------------|-------------|
| C | -4.04476400 | 3.07412100  | -2.61397400 |
| H | -4.35386400 | 2.38956100  | -1.82426000 |
| H | -4.86473600 | 3.77984400  | -2.78342400 |
| H | -3.90401100 | 2.51117400  | -3.54012200 |
| H | -1.70640400 | 1.33708400  | -0.18495100 |
| B | -6.05655700 | 0.79708500  | 0.21737800  |
| F | -4.78224000 | 0.98957100  | -0.38691400 |
| F | -6.97393900 | 1.64285000  | -0.39912600 |
| F | -5.94083300 | 1.11458000  | 1.57852200  |
| F | -6.43109300 | -0.53638400 | 0.05962100  |
| N | -2.74337400 | -1.55144800 | -2.62543800 |
| C | -1.66414800 | -2.40488700 | -3.11312500 |
| C | -2.05005000 | -3.87965000 | -3.18844000 |
| H | -0.82290800 | -2.28149700 | -2.42008300 |
| H | -1.29651200 | -2.08391500 | -4.10618200 |
| H | -1.15170500 | -4.49806900 | -3.27937900 |
| H | -2.59535200 | -4.17847100 | -2.28885300 |
| H | -2.68040900 | -4.09317600 | -4.05560100 |
| C | -3.94135900 | -1.66601300 | -3.45485000 |
| C | -5.07524700 | -0.75187600 | -3.01419800 |
| H | -4.28890200 | -2.70151400 | -3.37882100 |
| H | -3.70750600 | -1.49165300 | -4.52335300 |
| H | -5.97859500 | -0.99878300 | -3.57956000 |
| H | -5.28552700 | -0.87516400 | -1.94910000 |
| H | -4.85039900 | 0.30368100  | -3.19255800 |
| C | -2.28248000 | -0.17459400 | -2.43736200 |
| C | -1.87449100 | 0.59088300  | -3.69934300 |
| H | -1.41431300 | -0.22809600 | -1.76628100 |
| H | -3.07442300 | 0.37227500  | -1.91025600 |
| H | -1.56266000 | 1.60615100  | -3.43090800 |
| H | -1.02917500 | 0.11498400  | -4.20415900 |
| H | -2.70476900 | 0.66725300  | -4.41024900 |
| C | 1.59530400  | 1.46618300  | -1.26786400 |
| C | 0.82333000  | 1.12113500  | -0.14988100 |
| H | 1.79355000  | 2.53499300  | -1.32583900 |
| C | 0.62211600  | 2.13224600  | 0.85635200  |
| H | 1.05528900  | 3.11641500  | 0.59865100  |
| O | -0.03488200 | 1.99308400  | 1.89315700  |
| C | 1.55549800  | 0.81059100  | -2.59577100 |
| C | 1.57517100  | 1.63382800  | -3.73111500 |
| C | 1.50574500  | -0.57679900 | -2.78062700 |
| C | 1.57779300  | 1.08681600  | -5.01089600 |
| H | 1.58193400  | 2.71235500  | -3.60257800 |
| C | 1.52141900  | -1.12507800 | -4.05901700 |

|    |             |             |             |
|----|-------------|-------------|-------------|
| H  | 1.44747300  | -1.23423700 | -1.92347400 |
| C  | 1.56536100  | -0.29662000 | -5.17965800 |
| H  | 1.59112300  | 1.74325400  | -5.87529600 |
| H  | 1.49364000  | -2.20578100 | -4.16363800 |
| H  | 1.57995600  | -0.72601900 | -6.17624800 |
| C  | 0.39248500  | -0.20653000 | 0.12249300  |
| C  | 0.05178100  | -1.34730800 | 0.37948500  |
| C  | -0.22455500 | -2.72206300 | 0.67264200  |
| C  | 0.68404800  | -3.46957700 | 1.43503600  |
| C  | -1.35352500 | -3.35461900 | 0.13745700  |
| C  | 0.47178900  | -4.82689200 | 1.63878700  |
| H  | 1.56365300  | -2.98198300 | 1.84657600  |
| C  | -1.56302500 | -4.70847100 | 0.36651100  |
| H  | -2.05201900 | -2.78550300 | -0.47170700 |
| C  | -0.65000900 | -5.46845800 | 1.10438500  |
| H  | 1.18734800  | -5.40059300 | 2.22152200  |
| H  | -2.46388700 | -5.17449300 | -0.02701300 |
| C  | 5.81253100  | -3.26895300 | -1.22922700 |
| C  | 4.85178800  | -2.41063600 | -0.68603600 |
| C  | 3.49478000  | -2.61544800 | -0.87525000 |
| C  | 3.12285200  | -3.69268800 | -1.68351800 |
| C  | 4.06264900  | -4.52735300 | -2.27863700 |
| C  | 5.42265000  | -4.32124000 | -2.04231800 |
| C  | 7.18976200  | -2.90030600 | -0.72440300 |
| C  | 6.85370100  | -2.10327900 | 0.53860300  |
| C  | 5.56994000  | -1.34976000 | 0.12339200  |
| H  | 2.74514700  | -1.98380900 | -0.40238200 |
| H  | 3.73082200  | -5.35153500 | -2.89932300 |
| H  | 6.15556600  | -4.99745700 | -2.47024100 |
| H  | 7.81162500  | -3.76516500 | -0.48606300 |
| H  | 7.64827900  | -1.43285700 | 0.88746000  |
| H  | 5.82134900  | -0.47635300 | -0.48625100 |
| H  | 7.73042600  | -2.26749800 | -1.43659900 |
| Br | 1.28310300  | -4.04887000 | -1.96076300 |
| O  | 6.51739700  | -3.05898600 | 1.53332400  |
| C  | 6.10531500  | -2.49814200 | 2.75481200  |
| H  | 5.68506200  | -3.29924700 | 3.36431700  |
| H  | 6.95130800  | -2.05279200 | 3.29619100  |
| N  | 4.86499600  | -0.86514200 | 1.31171500  |
| C  | 4.04572900  | 0.20528300  | 1.48409500  |
| C  | 5.08352000  | -1.41844700 | 2.54221200  |
| N  | 4.43202800  | -0.77167100 | 3.46348700  |
| N  | 3.79914900  | 0.23355400  | 2.80173300  |
| C  | 3.06099000  | 1.17299400  | 3.62212300  |

|           |             |             |             |
|-----------|-------------|-------------|-------------|
| C         | 3.72910800  | 2.31200300  | 4.08215600  |
| C         | 1.78309700  | 0.81175500  | 4.03823700  |
| C         | 3.02576400  | 3.15325400  | 4.93796200  |
| C         | 1.12505200  | 1.68679500  | 4.90301500  |
| C         | 1.71922200  | 2.86517300  | 5.34583100  |
| H         | 3.51382900  | 4.05259200  | 5.30494900  |
| H         | 0.12266300  | 1.43123000  | 5.23734300  |
| C         | 0.96955900  | 3.81893600  | 6.23868800  |
| H         | 0.49883800  | 4.60820400  | 5.64373700  |
| H         | 0.18065000  | 3.30552600  | 6.79252000  |
| H         | 1.63958700  | 4.30143000  | 6.95413200  |
| C         | 1.15618900  | -0.47834200 | 3.59494300  |
| H         | 1.11181500  | -0.53599500 | 2.50514900  |
| H         | 1.72546700  | -1.33756000 | 3.96553200  |
| H         | 0.13477300  | -0.55739100 | 3.97333700  |
| C         | 5.14822900  | 2.60501300  | 3.68037700  |
| H         | 5.79187200  | 1.73415600  | 3.84242100  |
| H         | 5.19000700  | 2.86790000  | 2.62041800  |
| H         | 5.54675100  | 3.43510700  | 4.26552800  |
| C         | 4.40232400  | 2.06793500  | -1.88238600 |
| C         | 3.75163400  | 1.12316200  | -0.86789900 |
| H         | 4.37617800  | 1.53606200  | -2.83893900 |
| C         | 3.74024200  | 1.34930200  | 0.52241700  |
| O         | 3.44574600  | 2.40213900  | 1.11383300  |
| C         | 3.91480500  | 3.48532700  | -2.15806200 |
| C         | 3.92693000  | 3.93053700  | -3.48611900 |
| C         | 3.52796200  | 4.39187800  | -1.16495700 |
| C         | 3.54864000  | 5.22820400  | -3.82014600 |
| H         | 4.22140600  | 3.24058900  | -4.27353300 |
| C         | 3.14057100  | 5.68939600  | -1.49752600 |
| H         | 3.51327100  | 4.06771300  | -0.13086700 |
| C         | 3.14626500  | 6.11506000  | -2.82331500 |
| H         | 3.56113300  | 5.54319100  | -4.85919400 |
| H         | 2.83656500  | 6.37238900  | -0.70918400 |
| H         | 2.84181800  | 7.12550100  | -3.07842000 |
| H         | 3.86379700  | 0.08341200  | -1.16632600 |
| H         | 5.46880200  | 2.14545000  | -1.62371500 |
| C         | -0.85978600 | -6.94740400 | 1.29663900  |
| H         | -0.44610400 | -7.50712100 | 0.45113500  |
| H         | -0.36637100 | -7.30485400 | 2.20322100  |
| H         | -1.92321100 | -7.18955400 | 1.36119600  |
| TS4CMe-SS |             |             |             |
| C         | -6.28879900 | -1.90793700 | 2.05946000  |

|    |             |             |             |
|----|-------------|-------------|-------------|
| C  | -5.33801600 | -1.19353700 | 1.32467900  |
| C  | -4.93666000 | -1.60458100 | 0.05985400  |
| C  | -5.54303500 | -2.75201700 | -0.44566900 |
| C  | -6.51911800 | -3.45767700 | 0.25070000  |
| C  | -6.89745900 | -3.03264200 | 1.52133100  |
| C  | -6.49844900 | -1.28883000 | 3.41925500  |
| C  | -5.98749900 | 0.13354000  | 3.20617200  |
| C  | -4.83341000 | -0.05061800 | 2.18868700  |
| H  | -4.19117000 | -1.08033700 | -0.53269200 |
| H  | -6.96974300 | -4.33574900 | -0.19761500 |
| H  | -7.65958400 | -3.57328400 | 2.07453300  |
| H  | -7.53880100 | -1.28130400 | 3.75080700  |
| H  | -5.66030700 | 0.64713100  | 4.11939300  |
| H  | -3.90967800 | -0.33799000 | 2.70256900  |
| H  | -5.89054600 | -1.80074000 | 4.17571400  |
| Br | -4.98056600 | -3.43943500 | -2.12003800 |
| O  | -7.05195200 | 0.83664900  | 2.58684400  |
| C  | -6.75781000 | 2.18016400  | 2.29180100  |
| H  | -7.56692700 | 2.57166700  | 1.67892500  |
| H  | -6.65881100 | 2.77446500  | 3.21141000  |
| N  | -4.58152700 | 1.23510500  | 1.53267900  |
| C  | -3.49727300 | 1.65683700  | 0.87141300  |
| C  | -5.47570700 | 2.27048200  | 1.52685900  |
| N  | -4.98558100 | 3.30644200  | 0.91015500  |
| N  | -3.75164000 | 2.90258200  | 0.50249700  |
| C  | -2.86646900 | 3.86171800  | -0.10705900 |
| C  | -3.10982700 | 4.26183300  | -1.42162300 |
| C  | -1.86750200 | 4.41858500  | 0.69757000  |
| C  | -2.27403400 | 5.25100300  | -1.94555000 |
| C  | -1.07940800 | 5.41632900  | 0.13189600  |
| C  | -1.26511700 | 5.84269600  | -1.18609000 |
| H  | -2.43771000 | 5.58065200  | -2.96862900 |
| H  | -0.31702100 | 5.88455600  | 0.74835900  |
| C  | -0.39363500 | 6.92437100  | -1.77208200 |
| H  | -0.03173100 | 7.60240600  | -0.99467200 |
| H  | 0.48155900  | 6.49555800  | -2.27284700 |
| H  | -0.93924400 | 7.51158800  | -2.51391900 |
| C  | -1.65340400 | 3.97002700  | 2.11697600  |
| H  | -2.59830000 | 3.91308100  | 2.66638900  |
| H  | -1.18416100 | 2.98194400  | 2.12474000  |
| H  | -0.99444000 | 4.66616600  | 2.63856700  |
| C  | -4.24259100 | 3.69540500  | -2.23275100 |
| H  | -4.52666400 | 2.69078000  | -1.91873300 |
| H  | -5.13538800 | 4.32025100  | -2.12347400 |

|   |             |             |             |
|---|-------------|-------------|-------------|
| H | -3.97604100 | 3.67859800  | -3.29240900 |
| H | -2.55407800 | 1.13588900  | 0.71413800  |
| B | -6.80238600 | 1.11577800  | -1.42587400 |
| F | -5.45289500 | 1.01168700  | -1.00003800 |
| F | -6.84782500 | 1.91301200  | -2.57158700 |
| F | -7.54143100 | 1.71800500  | -0.39513100 |
| F | -7.29900500 | -0.15761000 | -1.68738500 |
| N | -2.67098300 | -0.99128700 | -2.75974100 |
| C | -1.42007900 | -1.71395700 | -2.97257600 |
| C | -1.56672900 | -3.22793800 | -2.88118100 |
| H | -0.71541300 | -1.39549500 | -2.20016100 |
| H | -0.95966500 | -1.44474900 | -3.94328000 |
| H | -0.59922400 | -3.70662800 | -3.06252000 |
| H | -1.91182400 | -3.50718500 | -1.88254600 |
| H | -2.28600500 | -3.61916000 | -3.60714800 |
| C | -3.45810300 | -0.92991800 | -3.98619300 |
| C | -4.81073300 | -0.25527100 | -3.81440200 |
| H | -3.62039700 | -1.96315900 | -4.31684900 |
| H | -2.89199400 | -0.43319900 | -4.79908500 |
| H | -5.38920600 | -0.35560100 | -4.73798100 |
| H | -5.37923500 | -0.71009200 | -2.99985500 |
| H | -4.72592400 | 0.81185900  | -3.59385100 |
| C | -2.45802100 | 0.30484300  | -2.11902600 |
| C | -1.62262100 | 1.32428900  | -2.89844400 |
| H | -1.96186100 | 0.09918800  | -1.16464000 |
| H | -3.43862600 | 0.72852400  | -1.88000100 |
| H | -1.48306700 | 2.22709000  | -2.29487700 |
| H | -0.62959300 | 0.92218100  | -3.13315000 |
| H | -2.10686300 | 1.61077900  | -3.83822900 |
| C | 1.58674200  | -0.97746400 | -0.88061900 |
| C | 0.51205700  | -0.41831900 | -0.17242600 |
| H | 2.03378700  | -0.28609900 | -1.59531600 |
| C | 0.31846000  | 1.01197600  | -0.22087700 |
| H | 1.06215300  | 1.56063900  | -0.82980000 |
| O | -0.61593500 | 1.62316400  | 0.29919200  |
| C | 1.66329800  | -2.38401500 | -1.34884300 |
| C | 2.10105100  | -2.61924000 | -2.66098000 |
| C | 1.31098900  | -3.48483300 | -0.55563900 |
| C | 2.20956500  | -3.91300900 | -3.16285300 |
| H | 2.33369800  | -1.77190600 | -3.30360200 |
| C | 1.41832700  | -4.77771300 | -1.05925900 |
| H | 0.95333600  | -3.32736000 | 0.45492700  |
| C | 1.87348600  | -4.99929800 | -2.35815700 |
| H | 2.54630800  | -4.06941900 | -4.18272600 |

|    |             |             |             |
|----|-------------|-------------|-------------|
| H  | 1.14521700  | -5.61860600 | -0.43008800 |
| H  | 1.95690900  | -6.01040300 | -2.74241500 |
| C  | -0.43507900 | -1.18562300 | 0.56371900  |
| C  | -1.26745400 | -1.82763600 | 1.17608300  |
| C  | -2.19191100 | -2.60716100 | 1.94425000  |
| C  | -2.38732500 | -2.33139000 | 3.30556800  |
| C  | -2.92323600 | -3.65050900 | 1.35393500  |
| C  | -3.31699700 | -3.05654800 | 4.04346700  |
| H  | -1.80833500 | -1.54106900 | 3.77395800  |
| C  | -3.83160100 | -4.37992100 | 2.10642100  |
| H  | -2.81234000 | -3.85046800 | 0.29187600  |
| C  | -4.05881900 | -4.08446900 | 3.45519000  |
| H  | -3.46666300 | -2.82366800 | 5.09477200  |
| H  | -4.40318200 | -5.17259700 | 1.63124700  |
| C  | 6.90985800  | -2.36709800 | -2.29492300 |
| C  | 6.27132800  | -1.51247100 | -1.39374500 |
| C  | 6.68149600  | -1.40017500 | -0.07301700 |
| C  | 7.75000700  | -2.20003200 | 0.32812100  |
| C  | 8.38775500  | -3.07702700 | -0.54401300 |
| C  | 7.96697400  | -3.15949400 | -1.87111600 |
| C  | 6.29532800  | -2.23939400 | -3.66986800 |
| C  | 5.59289400  | -0.88227400 | -3.59131000 |
| C  | 5.13308400  | -0.82029400 | -2.11649100 |
| H  | 6.20070200  | -0.72716300 | 0.63192300  |
| H  | 9.21569200  | -3.67996000 | -0.18991700 |
| H  | 8.47538000  | -3.82597400 | -2.56006600 |
| H  | 7.02433600  | -2.25212000 | -4.48227300 |
| H  | 4.75882700  | -0.76374500 | -4.29464600 |
| H  | 4.19849400  | -1.37812000 | -2.00865100 |
| H  | 5.55882800  | -3.03057100 | -3.84991200 |
| Br | 8.36129900  | -2.08617700 | 2.11809400  |
| O  | 6.58179400  | 0.10842700  | -3.81719700 |
| C  | 6.07469500  | 1.41874200  | -3.74071800 |
| H  | 6.91156700  | 2.11210300  | -3.82706400 |
| H  | 5.36332900  | 1.61862900  | -4.55434700 |
| N  | 4.88284500  | 0.56740200  | -1.71695600 |
| C  | 4.20503000  | 1.07710500  | -0.65790600 |
| C  | 5.37188100  | 1.62755400  | -2.43257800 |
| N  | 5.05525100  | 2.75611200  | -1.87045300 |
| N  | 4.33303000  | 2.40149200  | -0.77301000 |
| C  | 3.85544300  | 3.45649200  | 0.08583600  |
| C  | 2.88822600  | 4.31574800  | -0.42674900 |
| C  | 4.43336700  | 3.60630600  | 1.35241300  |
| C  | 2.51258500  | 5.39595800  | 0.37447400  |



|   |             |             |             |
|---|-------------|-------------|-------------|
| C | 4.00636500  | 4.68795600  | 2.11440300  |
| C | 3.05123000  | 5.59491600  | 1.64158900  |
| H | 1.77836100  | 6.09607500  | -0.01522500 |
| H | 4.43273800  | 4.83050700  | 3.10421400  |
| C | 2.59628900  | 6.74347700  | 2.50343000  |
| H | 1.91472300  | 6.38989800  | 3.28379600  |
| H | 3.44256000  | 7.22344600  | 3.00112600  |
| H | 2.06903100  | 7.49639800  | 1.91335500  |
| C | 5.44111200  | 2.62472100  | 1.88875700  |
| H | 4.93723100  | 1.71112800  | 2.22833900  |
| H | 6.18292100  | 2.34690900  | 1.13316600  |
| H | 5.97072800  | 3.05260000  | 2.74140700  |
| C | 2.23727300  | 4.11675100  | -1.77134000 |
| H | 2.39841000  | 3.11318500  | -2.17005100 |
| H | 1.15768400  | 4.27248000  | -1.67920700 |
| H | 2.62553000  | 4.83020300  | -2.50482000 |
| C | 2.77831900  | -1.55564700 | 1.77782700  |
| C | 3.30645500  | -0.98582500 | 0.48005100  |
| H | 2.82957500  | -2.64778700 | 1.73858700  |
| C | 3.38458600  | 0.41527400  | 0.42100700  |
| O | 2.68198600  | 1.17959900  | 1.10586700  |
| C | 3.57993800  | -1.03837400 | 2.95749600  |
| C | 4.89017500  | -1.47435300 | 3.17992400  |
| C | 3.04506900  | -0.06430100 | 3.80415100  |
| C | 5.64566300  | -0.95118500 | 4.22681700  |
| H | 5.32692100  | -2.22821300 | 2.52624500  |
| C | 3.79670700  | 0.45798900  | 4.85459000  |
| H | 2.03885000  | 0.29772600  | 3.61687700  |
| C | 5.10019300  | 0.01633200  | 5.06887900  |
| H | 6.66154400  | -1.29947300 | 4.38146100  |
| H | 3.36539900  | 1.21645700  | 5.50067700  |
| H | 5.68886200  | 0.42355500  | 5.88479000  |
| H | 4.03024700  | -1.59501900 | -0.04572300 |
| H | 1.72926800  | -1.26892700 | 1.90887200  |
| C | -5.11702400 | -4.82066400 | 4.23123300  |
| H | -6.10774100 | -4.41201300 | 3.99695900  |
| H | -5.13532000 | -5.88211100 | 3.97208200  |
| H | -4.96220300 | -4.72724300 | 5.30839600  |

TS4CMe-RR

|   |             |             |             |
|---|-------------|-------------|-------------|
| C | -0.81316900 | -4.36134400 | 0.91715800  |
| C | -1.28192400 | -3.05884300 | 0.74323900  |
| C | -1.16264600 | -2.39830200 | -0.47491500 |
| C | -0.54249900 | -3.09065300 | -1.51037900 |

|    |             |             |             |
|----|-------------|-------------|-------------|
| C  | -0.09006600 | -4.40177600 | -1.36754900 |
| C  | -0.22373800 | -5.04375800 | -0.14013400 |
| C  | -1.01726800 | -4.83595300 | 2.33419600  |
| C  | -1.96848400 | -3.79797500 | 2.94099900  |
| C  | -1.75846000 | -2.52529100 | 2.07607000  |
| H  | -1.53717800 | -1.39368200 | -0.65885100 |
| H  | 0.36460500  | -4.90921100 | -2.21196200 |
| H  | 0.12617400  | -6.06383200 | -0.01814000 |
| H  | -1.46899400 | -5.82881700 | 2.39830800  |
| H  | -1.76909300 | -3.59413900 | 4.00165900  |
| H  | -0.98975500 | -1.87447800 | 2.50561700  |
| H  | -0.06906800 | -4.86815100 | 2.88182900  |
| Br | -0.25503100 | -2.20533000 | -3.15377400 |
| O  | -3.28361200 | -4.29756900 | 2.79333700  |
| C  | -4.25135000 | -3.43239100 | 3.34099400  |
| H  | -5.23118800 | -3.86800400 | 3.16332200  |
| H  | -4.08513600 | -3.28831500 | 4.41851500  |
| N  | -2.98968200 | -1.73290700 | 2.05395000  |
| C  | -3.21520300 | -0.54341200 | 1.48968400  |
| C  | -4.16663000 | -2.11725000 | 2.63597800  |
| N  | -5.07942500 | -1.19998600 | 2.49893100  |
| N  | -4.46586500 | -0.22584500 | 1.77338300  |
| C  | -5.13810200 | 1.00335800  | 1.46226600  |
| C  | -6.34703000 | 0.93095200  | 0.76029500  |
| C  | -4.57062200 | 2.20265200  | 1.90709000  |
| C  | -7.00015300 | 2.13525000  | 0.50803300  |
| C  | -5.26580300 | 3.37575200  | 1.61190100  |
| C  | -6.47386000 | 3.36182100  | 0.91814400  |
| H  | -7.93802700 | 2.11235000  | -0.04232500 |
| H  | -4.84620600 | 4.32456300  | 1.93368500  |
| C  | -7.19833200 | 4.64256600  | 0.59931300  |
| H  | -8.25222300 | 4.57970800  | 0.88401400  |
| H  | -6.74695600 | 5.49149400  | 1.11764300  |
| H  | -7.15957800 | 4.84646900  | -0.47594900 |
| C  | -3.28509500 | 2.25241100  | 2.69463800  |
| H  | -3.28376300 | 1.51212400  | 3.50173700  |
| H  | -2.40346700 | 2.05830400  | 2.07320100  |
| H  | -3.16609300 | 3.24224300  | 3.13896500  |
| C  | -6.90254100 | -0.37707200 | 0.26522500  |
| H  | -6.12344800 | -1.02149800 | -0.14892300 |
| H  | -7.37337000 | -0.93775700 | 1.07797100  |
| H  | -7.65269700 | -0.19456000 | -0.50700800 |
| H  | -2.49910600 | 0.07106200  | 0.96051700  |
| B  | -5.20005500 | -3.56884700 | -0.30348000 |

|   |             |             |             |
|---|-------------|-------------|-------------|
| F | -4.34631400 | -2.44959700 | -0.14690800 |
| F | -6.31989600 | -3.17373400 | -1.04661300 |
| F | -5.61365400 | -3.99819600 | 0.96667200  |
| F | -4.51232000 | -4.58454800 | -0.95669600 |
| N | -2.94708700 | -0.17775200 | -2.89771800 |
| C | -2.08756600 | 0.84826900  | -3.47392500 |
| C | -2.64218100 | 1.72596600  | -4.60563300 |
| H | -1.18884400 | 0.34009200  | -3.85028900 |
| H | -1.74591800 | 1.48570800  | -2.65172600 |
| H | -1.82529400 | 2.31468700  | -5.03436900 |
| H | -3.07248000 | 1.12119400  | -5.40958000 |
| H | -3.40790900 | 2.42736300  | -4.26377700 |
| C | -3.45017600 | -1.12239100 | -3.88599000 |
| C | -3.96267200 | -2.40879400 | -3.25551700 |
| H | -2.61237600 | -1.35807900 | -4.55333400 |
| H | -4.23957500 | -0.68383000 | -4.52291200 |
| H | -4.22671200 | -3.12843000 | -4.03667400 |
| H | -3.19556300 | -2.85220800 | -2.61574600 |
| H | -4.84736600 | -2.24959400 | -2.63467500 |
| C | -3.95174300 | 0.29652100  | -1.94897700 |
| C | -5.24639500 | 0.86705300  | -2.54516700 |
| H | -3.46667500 | 1.05517300  | -1.31798100 |
| H | -4.21164600 | -0.54004100 | -1.28830900 |
| H | -5.84499000 | 1.33522300  | -1.75985000 |
| H | -5.05093400 | 1.62223200  | -3.31086800 |
| H | -5.84999700 | 0.07596900  | -3.00191900 |
| C | 1.41492800  | 0.65770600  | -1.10251200 |
| C | 0.37311700  | 0.93246600  | -0.18676500 |
| H | 1.84668600  | -0.33413100 | -0.96204000 |
| C | 0.30276100  | 0.12708400  | 1.00187800  |
| H | 1.09340000  | -0.64764800 | 1.07480500  |
| O | -0.56323000 | 0.19194200  | 1.88156100  |
| C | 1.44264500  | 1.05993600  | -2.53308900 |
| C | 2.09307000  | 0.21157200  | -3.44060400 |
| C | 0.85638700  | 2.23399000  | -3.02703700 |
| C | 2.14218400  | 0.51122300  | -4.79748700 |
| H | 2.53317800  | -0.71378900 | -3.08040600 |
| C | 0.92091000  | 2.54249800  | -4.38297300 |
| H | 0.34351900  | 2.90775800  | -2.35118000 |
| C | 1.55506200  | 1.68114500  | -5.27540400 |
| H | 2.63659300  | -0.17183700 | -5.48079500 |
| H | 0.46591500  | 3.46023400  | -4.74249800 |
| H | 1.59387200  | 1.92083500  | -6.33309700 |
| C | -0.58061400 | 1.98393800  | -0.28457900 |

|    |             |             |             |
|----|-------------|-------------|-------------|
| C  | -1.43686400 | 2.84951400  | -0.30344300 |
| C  | -2.38783200 | 3.92247300  | -0.35383300 |
| C  | -3.38974300 | 3.95698000  | -1.33453300 |
| C  | -2.31112900 | 4.97767000  | 0.56896600  |
| C  | -4.28080300 | 5.02212500  | -1.39127700 |
| H  | -3.46166800 | 3.14389600  | -2.05038900 |
| C  | -3.20369800 | 6.03925800  | 0.49796200  |
| H  | -1.53897000 | 4.95626300  | 1.33158200  |
| C  | -4.19882600 | 6.08366600  | -0.48534200 |
| H  | -5.05044100 | 5.03299000  | -2.15917600 |
| H  | -3.12672800 | 6.85270000  | 1.21493600  |
| C  | 6.93215400  | -0.85865400 | -1.77417700 |
| C  | 5.82905300  | -0.49553400 | -1.00578400 |
| C  | 4.64248800  | -1.19975800 | -1.04799100 |
| C  | 4.55856100  | -2.28163500 | -1.91444500 |
| C  | 5.62422500  | -2.64288400 | -2.73246800 |
| C  | 6.82446800  | -1.92684700 | -2.65722300 |
| C  | 8.11650500  | 0.00455100  | -1.39283700 |
| C  | 7.73370600  | 0.48503500  | 0.01717600  |
| C  | 6.19340400  | 0.63940500  | -0.07787400 |
| H  | 3.79970600  | -0.94878600 | -0.41444900 |
| H  | 5.53236700  | -3.49021900 | -3.40205300 |
| H  | 7.66908300  | -2.23341000 | -3.26554400 |
| H  | 9.06465500  | -0.53561100 | -1.36638000 |
| H  | 8.22822700  | 1.41156500  | 0.33124900  |
| H  | 5.92627300  | 1.62838300  | -0.46512200 |
| H  | 8.22384300  | 0.86058000  | -2.06726300 |
| Br | 2.92221700  | -3.23397600 | -1.90261100 |
| O  | 8.06164800  | -0.57965500 | 0.89631000  |
| C  | 7.65875700  | -0.35499400 | 2.22826900  |
| H  | 7.93188100  | -1.22993500 | 2.81769300  |
| H  | 8.15276700  | 0.53092300  | 2.65044800  |
| N  | 5.54353400  | 0.45839900  | 1.22287000  |
| C  | 4.22815600  | 0.54785900  | 1.53852000  |
| C  | 6.17495600  | -0.15627900 | 2.26898400  |
| N  | 5.33011000  | -0.46167500 | 3.21045300  |
| N  | 4.12968800  | -0.02145800 | 2.74377100  |
| C  | 2.92880500  | -0.36574700 | 3.46283800  |
| C  | 2.45785200  | 0.51519500  | 4.43690400  |
| C  | 2.33738800  | -1.59723400 | 3.17412900  |
| C  | 1.29309100  | 0.15228300  | 5.10634600  |
| C  | 1.18908200  | -1.92156800 | 3.89650100  |
| C  | 0.63859300  | -1.05106600 | 4.83710400  |
| H  | 0.88637000  | 0.82603000  | 5.85549300  |

|   |             |             |             |
|---|-------------|-------------|-------------|
| H | 0.71896000  | -2.88639500 | 3.71892300  |
| C | -0.65203600 | -1.39271100 | 5.53260000  |
| H | -0.77308900 | -0.81814100 | 6.45284200  |
| H | -1.50409000 | -1.15514100 | 4.88311600  |
| H | -0.70304300 | -2.45613900 | 5.78124000  |
| C | 2.88937100  | -2.54301400 | 2.13501100  |
| H | 2.49906000  | -2.32922900 | 1.13092900  |
| H | 3.98102000  | -2.50695700 | 2.08346200  |
| H | 2.59800900  | -3.56861400 | 2.37119000  |
| C | 3.18221100  | 1.79964600  | 4.72662000  |
| H | 4.22205700  | 1.60759000  | 5.00866300  |
| H | 3.18181200  | 2.43143200  | 3.83360800  |
| H | 2.69794500  | 2.33828200  | 5.54215900  |
| C | 2.76512100  | 3.17830100  | -0.75788100 |
| C | 3.15096400  | 1.73651400  | -0.46864200 |
| H | 1.76220900  | 3.37218400  | -0.36261200 |
| C | 3.15098300  | 1.40985700  | 0.90786200  |
| O | 2.29734700  | 1.82767800  | 1.70706200  |
| C | 3.76631800  | 4.11402700  | -0.11593200 |
| C | 4.98941400  | 4.37906500  | -0.74158600 |
| C | 3.52102700  | 4.67239500  | 1.14229500  |
| C | 5.95026200  | 5.17499700  | -0.12266400 |
| H | 5.18371000  | 3.96011500  | -1.72723300 |
| C | 4.48037200  | 5.47028000  | 1.76307900  |
| H | 2.57501700  | 4.46559800  | 1.63407000  |
| C | 5.69835500  | 5.72168400  | 1.13503400  |
| H | 6.89176500  | 5.37559500  | -0.62473700 |
| H | 4.27429500  | 5.89862800  | 2.73923900  |
| H | 6.44384100  | 6.34497100  | 1.61819500  |
| H | 3.92249300  | 1.32161900  | -1.11024500 |
| H | 2.74574900  | 3.34185300  | -1.83711000 |
| C | -5.12724400 | 7.26624300  | -0.58373500 |
| H | -5.42483200 | 7.62036500  | 0.40697700  |
| H | -6.02980300 | 7.01738000  | -1.14653800 |
| H | -4.63573600 | 8.10074700  | -1.09460600 |

TS4CMe-SR

|   |            |             |             |
|---|------------|-------------|-------------|
| C | 1.56564400 | -4.59141600 | 0.56344000  |
| C | 1.90426200 | -3.26454700 | 0.29384500  |
| C | 2.14972000 | -2.34642300 | 1.30793200  |
| C | 2.05076700 | -2.81572300 | 2.61467700  |
| C | 1.69355000 | -4.12855600 | 2.91074600  |
| C | 1.44570800 | -5.02760000 | 1.87577800  |
| C | 1.38658100 | -5.37218600 | -0.71807300 |

|    |            |             |             |
|----|------------|-------------|-------------|
| C  | 2.10525600 | -4.50735700 | -1.75924100 |
| C  | 1.92772600 | -3.07281600 | -1.20718100 |
| H  | 2.46781800 | -1.32303300 | 1.12766100  |
| H  | 1.63389500 | -4.44740500 | 3.94492000  |
| H  | 1.18694000 | -6.05737600 | 2.10020300  |
| H  | 1.82217700 | -6.37319000 | -0.68764600 |
| H  | 1.69703100 | -4.60152200 | -2.77470300 |
| H  | 0.99222300 | -2.65750000 | -1.58758400 |
| H  | 0.32501000 | -5.46791600 | -0.97466500 |
| Br | 2.46760700 | -1.64991200 | 4.04833100  |
| O  | 3.47015500 | -4.87474600 | -1.74767400 |
| C  | 4.25651300 | -4.12758000 | -2.64684500 |
| H  | 5.29455700 | -4.41672600 | -2.49852800 |
| H  | 3.95566800 | -4.31951300 | -3.68672400 |
| N  | 2.99733100 | -2.21136500 | -1.70351500 |
| C  | 3.12519100 | -0.88711400 | -1.60170900 |
| C  | 4.10999600 | -2.66580300 | -2.35387700 |
| N  | 4.88422100 | -1.67585100 | -2.69707900 |
| N  | 4.25410800 | -0.57081200 | -2.21182800 |
| C  | 4.78380500 | 0.74635600  | -2.43076200 |
| C  | 6.09608900 | 1.01537200  | -2.02133000 |
| C  | 3.96949600 | 1.68750900  | -3.07360000 |
| C  | 6.58574200 | 2.29580300  | -2.27614300 |
| C  | 4.51619600 | 2.95169000  | -3.29525200 |
| C  | 5.81276100 | 3.27672100  | -2.89783900 |
| H  | 7.59620300 | 2.53646200  | -1.95587400 |
| H  | 3.91315700 | 3.69848400  | -3.80662900 |
| C  | 6.34424800 | 4.67255000  | -3.08606400 |
| H  | 7.42563500 | 4.67020300  | -3.23810500 |
| H  | 5.87192800 | 5.16590100  | -3.93868400 |
| H  | 6.13580500 | 5.27513700  | -2.19482000 |
| C  | 2.56584900 | 1.37442200  | -3.53149000 |
| H  | 2.50573200 | 0.39619900  | -4.01792600 |
| H  | 1.84759500 | 1.36307500  | -2.70204100 |
| H  | 2.23562400 | 2.12919600  | -4.24857900 |
| C  | 6.94666700 | -0.00414800 | -1.31296500 |
| H  | 6.36917000 | -0.58787900 | -0.59342700 |
| H  | 7.38109100 | -0.71102500 | -2.02615000 |
| H  | 7.76312100 | 0.49773400  | -0.78977300 |
| H  | 2.43155500 | -0.20118000 | -1.13504900 |
| B  | 5.60131800 | -2.82286800 | 0.73461600  |
| F  | 4.80246500 | -1.73091100 | 0.30459500  |
| F  | 6.89964400 | -2.36164400 | 0.96383200  |
| F  | 5.61708000 | -3.78316800 | -0.28789400 |

|   |             |             |             |
|---|-------------|-------------|-------------|
| F | 5.05331700  | -3.36216400 | 1.89500900  |
| N | 3.63903300  | 1.07321300  | 2.37583900  |
| C | 2.55568600  | 1.83981400  | 2.98187100  |
| C | 2.91340400  | 3.14383300  | 3.70860900  |
| H | 2.05197200  | 1.18096900  | 3.70452700  |
| H | 1.82188800  | 2.04719800  | 2.19667100  |
| H | 1.99701500  | 3.59197200  | 4.10881300  |
| H | 3.58321500  | 2.95988200  | 4.55384800  |
| H | 3.38907000  | 3.87615300  | 3.05112300  |
| C | 4.76975600  | 0.88877300  | 3.27370600  |
| C | 5.69887300  | -0.23916000 | 2.85250800  |
| H | 4.34861000  | 0.64525300  | 4.25898200  |
| H | 5.35006900  | 1.81966900  | 3.41295100  |
| H | 6.50014600  | -0.35234200 | 3.58970800  |
| H | 5.15093500  | -1.18080800 | 2.77955500  |
| H | 6.16709100  | -0.05695900 | 1.88231200  |
| C | 3.97495800  | 1.42339900  | 1.00095000  |
| C | 4.69522600  | 2.75433600  | 0.75679500  |
| H | 3.03090800  | 1.43842700  | 0.44036900  |
| H | 4.57139100  | 0.60029800  | 0.58698600  |
| H | 4.85558400  | 2.89232200  | -0.31705100 |
| H | 4.10068100  | 3.60253400  | 1.10741300  |
| H | 5.67268800  | 2.78177300  | 1.25114300  |
| C | -0.97287300 | -0.14029900 | 1.40471700  |
| C | -0.29367100 | 0.22369200  | 0.22660600  |
| H | -1.16224700 | -1.21039800 | 1.51188100  |
| C | -0.25469300 | -0.73572200 | -0.83602500 |
| H | -0.70290400 | -1.71918700 | -0.57517800 |
| O | 0.21119500  | -0.55572900 | -1.97000000 |
| C | -0.85932500 | 0.60218000  | 2.67228700  |
| C | -0.59851800 | -0.12698300 | 3.83671900  |
| C | -0.99648000 | 1.99621900  | 2.75766400  |
| C | -0.42238000 | 0.52406300  | 5.05554800  |
| H | -0.48256900 | -1.20531500 | 3.77620000  |
| C | -0.84271700 | 2.64130500  | 3.97760200  |
| H | -1.23324200 | 2.57356400  | 1.86882200  |
| C | -0.54467000 | 1.90766100  | 5.12899500  |
| H | -0.19013700 | -0.05469100 | 5.94368700  |
| H | -0.95773400 | 3.71937600  | 4.03473800  |
| H | -0.41470300 | 2.41728200  | 6.07818500  |
| C | 0.30054900  | 1.49557700  | 0.01393800  |
| C | 0.79047700  | 2.59748900  | -0.14655400 |
| C | 1.44583600  | 3.86672700  | -0.18700100 |
| C | 2.10160400  | 4.30927400  | -1.34330800 |

|    |             |             |             |
|----|-------------|-------------|-------------|
| C  | 1.48698400  | 4.66504200  | 0.96731000  |
| C  | 2.81150000  | 5.50239700  | -1.33148500 |
| H  | 2.06299400  | 3.70051100  | -2.24002000 |
| C  | 2.19414200  | 5.86018800  | 0.96216200  |
| H  | 0.98458900  | 4.32236800  | 1.86802000  |
| C  | 2.87432000  | 6.29546800  | -0.18103200 |
| H  | 3.33245100  | 5.82378000  | -2.23047400 |
| H  | 2.23255600  | 6.46095800  | 1.86692200  |
| C  | -3.72591800 | 4.11374900  | -1.13140000 |
| C  | -3.95199400 | 2.75295200  | -0.91168200 |
| C  | -5.17911300 | 2.27345000  | -0.47694200 |
| C  | -6.17948000 | 3.21333800  | -0.23815500 |
| C  | -5.97535900 | 4.57623300  | -0.43029000 |
| C  | -4.73756500 | 5.03171600  | -0.88623000 |
| C  | -2.32152000 | 4.33880300  | -1.64711300 |
| C  | -1.92874600 | 2.95353900  | -2.16406200 |
| C  | -2.66458000 | 2.00597300  | -1.18824800 |
| H  | -5.36857700 | 1.21558000  | -0.31528100 |
| H  | -6.78142300 | 5.27391900  | -0.23532600 |
| H  | -4.58096600 | 6.09202300  | -1.05571200 |
| H  | -2.25824700 | 5.08378600  | -2.44271000 |
| H  | -0.84948400 | 2.76224700  | -2.18051100 |
| H  | -2.07014900 | 1.89440700  | -0.27971100 |
| H  | -1.64165300 | 4.63635500  | -0.83942900 |
| Br | -7.86958100 | 2.60995700  | 0.37185900  |
| O  | -2.48092700 | 2.81592600  | -3.46451600 |
| C  | -2.19039600 | 1.56166600  | -4.03227300 |
| H  | -2.68744800 | 1.49848600  | -5.00039200 |
| H  | -1.10779500 | 1.42831300  | -4.17300100 |
| N  | -2.82372700 | 0.67827800  | -1.78685000 |
| C  | -3.15769300 | -0.51086200 | -1.23230100 |
| C  | -2.68146800 | 0.46959000  | -3.13173800 |
| N  | -2.95407800 | -0.76335600 | -3.44517600 |
| N  | -3.24587700 | -1.35981800 | -2.26180000 |
| C  | -3.69018600 | -2.72980800 | -2.26461700 |
| C  | -2.81473200 | -3.70019000 | -2.74962000 |
| C  | -4.98747900 | -3.01229200 | -1.81836200 |
| C  | -3.27110800 | -5.01971500 | -2.75820700 |
| C  | -5.38947700 | -4.34354000 | -1.85462800 |
| C  | -4.54605700 | -5.35987700 | -2.31234300 |
| H  | -2.60620200 | -5.79831300 | -3.12357900 |
| H  | -6.39101200 | -4.59442000 | -1.51393900 |
| C  | -5.00892300 | -6.79326000 | -2.30314500 |
| H  | -4.36241700 | -7.42263500 | -2.91763800 |



|   |             |             |             |
|---|-------------|-------------|-------------|
| H | -4.99900200 | -7.19327800 | -1.28445700 |
| H | -6.03225700 | -6.87755800 | -2.67742900 |
| C | -5.91746600 | -1.94774800 | -1.29754900 |
| H | -5.68765600 | -1.70612300 | -0.25216800 |
| H | -5.85819800 | -1.02764400 | -1.88789900 |
| H | -6.94890400 | -2.30268800 | -1.33027000 |
| C | -1.43811300 | -3.36810000 | -3.26503500 |
| H | -1.47407100 | -3.14369600 | -4.33560000 |
| H | -0.99965200 | -2.49366300 | -2.77619000 |
| H | -0.77512500 | -4.22584700 | -3.12754900 |
| C | -3.71212100 | -0.49581400 | 2.58733100  |
| C | -3.25397100 | -0.00515400 | 1.23344200  |
| H | -3.65345900 | 0.32284000  | 3.31133400  |
| C | -3.23288500 | -0.96114100 | 0.20974900  |
| O | -3.12793700 | -2.19066900 | 0.37578800  |
| C | -5.12931500 | -1.02453900 | 2.47418700  |
| C | -5.38035500 | -2.39810300 | 2.49809700  |
| C | -6.19776700 | -0.15100000 | 2.23724800  |
| C | -6.66927800 | -2.89108900 | 2.29770900  |
| H | -4.55231300 | -3.08242300 | 2.65473600  |
| C | -7.48486400 | -0.64059200 | 2.03361200  |
| H | -6.01968300 | 0.92289500  | 2.19906100  |
| C | -7.72514400 | -2.01430400 | 2.06449000  |
| H | -6.84446500 | -3.96242600 | 2.31614100  |
| H | -8.29848400 | 0.05238800  | 1.84498800  |
| H | -8.72835400 | -2.39615600 | 1.90398900  |
| H | -3.43976900 | 1.03677700  | 1.00582800  |
| H | -3.05574300 | -1.29775000 | 2.94512000  |
| C | 3.63280700  | 7.59666000  | -0.18184500 |
| H | 2.99267100  | 8.41954600  | -0.51674700 |
| H | 3.99264900  | 7.84429300  | 0.81915300  |
| H | 4.49100700  | 7.55168300  | -0.85664000 |

R2NH

|   |             |             |             |
|---|-------------|-------------|-------------|
| C | -2.79781600 | 1.27274100  | -0.00630600 |
| C | -1.58108000 | 1.87382200  | -0.00698800 |
| H | -3.64912300 | 1.95276000  | -0.03483400 |
| C | -1.58289100 | 3.36044600  | -0.03082200 |
| H | -2.59451600 | 3.81218400  | -0.04253400 |
| O | -0.58717100 | 4.04760400  | -0.03683600 |
| C | -3.16323400 | -0.13912300 | 0.01785200  |
| C | -4.52703200 | -0.45679600 | -0.10320600 |
| C | -2.23973300 | -1.18885500 | 0.16205400  |
| C | -4.95788800 | -1.77689100 | -0.09345600 |

|   |             |             |             |
|---|-------------|-------------|-------------|
| H | -5.24980200 | 0.34755600  | -0.20861500 |
| C | -2.67489400 | -2.50813300 | 0.17568600  |
| H | -1.18562600 | -0.96785900 | 0.27096400  |
| C | -4.03056000 | -2.80806500 | 0.04534300  |
| H | -6.01462400 | -2.00174200 | -0.19142600 |
| H | -1.95136200 | -3.30864700 | 0.29052100  |
| H | -4.36263900 | -3.84103500 | 0.05536700  |
| C | -0.30276800 | 1.24841100  | -0.00078900 |
| C | 0.82315000  | 0.79372400  | -0.00517200 |
| C | 2.13347200  | 0.22894200  | -0.00860400 |
| C | 2.31942700  | -1.15582900 | -0.15377400 |
| C | 3.26770600  | 1.04537500  | 0.13211500  |
| C | 3.58925000  | -1.70520000 | -0.15687500 |
| H | 1.45310900  | -1.79959000 | -0.27050400 |
| C | 4.53925600  | 0.49979600  | 0.13028100  |
| H | 3.13811000  | 2.11708700  | 0.24178200  |
| C | 4.72360400  | -0.88665900 | -0.01425400 |
| H | 3.71758000  | -2.77755700 | -0.26970000 |
| H | 5.40674600  | 1.14329300  | 0.24233300  |
| N | 5.98818900  | -1.43905000 | 0.03924400  |
| H | 6.09116800  | -2.35220700 | -0.37976900 |
| H | 6.75321500  | -0.81795900 | -0.18210300 |

TS4CNH-RS

|    |             |             |             |
|----|-------------|-------------|-------------|
| C  | -3.78918700 | -1.21517100 | 3.49278100  |
| C  | -3.45192600 | -0.66720700 | 2.25170000  |
| C  | -3.78521400 | -1.29343300 | 1.06125600  |
| C  | -4.48382800 | -2.49395100 | 1.15776600  |
| C  | -4.82709600 | -3.06600100 | 2.37684000  |
| C  | -4.47381000 | -2.41965500 | 3.56189500  |
| C  | -3.30692200 | -0.32691300 | 4.61772000  |
| C  | -3.07457900 | 1.01104900  | 3.91198200  |
| C  | -2.65011200 | 0.59270200  | 2.48673900  |
| H  | -3.54990000 | -0.87680800 | 0.08626500  |
| H  | -5.37292700 | -4.00220300 | 2.39821500  |
| H  | -4.74653000 | -2.85271300 | 4.51912900  |
| H  | -4.02868400 | -0.21350900 | 5.42944600  |
| H  | -2.32702000 | 1.65826900  | 4.38936500  |
| H  | -1.57051300 | 0.40552800  | 2.43735100  |
| H  | -2.36785500 | -0.69916900 | 5.04298700  |
| Br | -4.97656300 | -3.38720100 | -0.43839100 |
| O  | -4.33697500 | 1.65684200  | 3.85851400  |
| C  | -4.32809300 | 2.91036100  | 3.21836300  |
| H  | -5.36508800 | 3.20696000  | 3.06718200  |

|   |             |             |             |
|---|-------------|-------------|-------------|
| H | -3.81047400 | 3.66391600  | 3.82845800  |
| N | -2.89531200 | 1.71517500  | 1.58386300  |
| C | -2.32741100 | 1.95850600  | 0.40606500  |
| C | -3.64058000 | 2.81720800  | 1.89159000  |
| N | -3.53946500 | 3.72905300  | 0.96265300  |
| N | -2.71434000 | 3.16612700  | 0.03511800  |
| C | -2.14812800 | 3.89594000  | -1.07196000 |
| C | -2.70191700 | 3.77122900  | -2.34639200 |
| C | -1.00768000 | 4.66940900  | -0.80462200 |
| C | -1.99332700 | 4.35081800  | -3.40350500 |
| C | -0.33442200 | 5.21200200  | -1.89593500 |
| C | -0.79748600 | 5.03610500  | -3.20425200 |
| H | -2.39217200 | 4.24891700  | -4.41010200 |
| H | 0.57017000  | 5.78956600  | -1.72234400 |
| C | -0.01822800 | 5.57970900  | -4.37310100 |
| H | 0.54290900  | 6.47426200  | -4.09299300 |
| H | 0.70888700  | 4.83944600  | -4.72604000 |
| H | -0.67812800 | 5.82299700  | -5.20873600 |
| C | -0.58402500 | 5.00253300  | 0.60350400  |
| H | -1.18269200 | 5.84357600  | 0.96872600  |
| H | -0.71914800 | 4.17581400  | 1.30468600  |
| H | 0.46578000  | 5.30506900  | 0.62099400  |
| C | -4.03053700 | 3.11248600  | -2.59955100 |
| H | -4.34971700 | 2.45880000  | -1.78792900 |
| H | -4.79395400 | 3.88807000  | -2.72243600 |
| H | -3.99648800 | 2.53836900  | -3.52874300 |
| H | -1.65176600 | 1.30949300  | -0.13419000 |
| B | -6.04206100 | 0.99423100  | 0.18021600  |
| F | -4.71842200 | 1.05670800  | -0.33574400 |
| F | -6.86504800 | 1.77982300  | -0.62246500 |
| F | -6.01867600 | 1.49288300  | 1.49108200  |
| F | -6.46563100 | -0.33337000 | 0.17320400  |
| N | -2.85366500 | -1.52844900 | -2.55855400 |
| C | -1.80392100 | -2.41210100 | -3.05734400 |
| C | -2.22165200 | -3.87895300 | -3.11065400 |
| H | -0.94846300 | -2.29730700 | -2.38082300 |
| H | -1.44732900 | -2.11115100 | -4.06068500 |
| H | -1.33753200 | -4.51699800 | -3.20555600 |
| H | -2.75998900 | -4.15714400 | -2.20071300 |
| H | -2.86760800 | -4.08838300 | -3.96733900 |
| C | -4.07664900 | -1.63319800 | -3.35197000 |
| C | -5.18561800 | -0.70129900 | -2.88486800 |
| H | -4.43596500 | -2.66318700 | -3.25779300 |
| H | -3.87185900 | -1.47069700 | -4.42823700 |

|   |             |             |             |
|---|-------------|-------------|-------------|
| H | -6.10433000 | -0.93029900 | -3.43294300 |
| H | -5.37573100 | -0.82706800 | -1.81662700 |
| H | -4.94750100 | 0.35172200  | -3.06011300 |
| C | -2.35682000 | -0.15729300 | -2.41998800 |
| C | -1.99027400 | 0.56719000  | -3.71772700 |
| H | -1.46057800 | -0.21523000 | -1.78649400 |
| H | -3.11264300 | 0.41843700  | -1.87209900 |
| H | -1.61705800 | 1.57009400  | -3.48891700 |
| H | -1.19832000 | 0.04547400  | -4.26073300 |
| H | -2.85634000 | 0.66867100  | -4.38121200 |
| C | 1.58405900  | 1.46740200  | -1.18401600 |
| C | 0.83505500  | 1.10099000  | -0.05565000 |
| H | 1.79858100  | 2.53498500  | -1.21645700 |
| C | 0.68579900  | 2.08869400  | 0.98125100  |
| H | 1.17718200  | 3.05083600  | 0.75263400  |
| O | 0.02235300  | 1.95863000  | 2.01527100  |
| C | 1.47543700  | 0.85527500  | -2.52966800 |
| C | 1.45267900  | 1.71264100  | -3.63874600 |
| C | 1.40996400  | -0.52585900 | -2.75386900 |
| C | 1.40995200  | 1.20467300  | -4.93420200 |
| H | 1.46770500  | 2.78668600  | -3.47444700 |
| C | 1.37945400  | -1.03529500 | -4.04790500 |
| H | 1.37651700  | -1.20787400 | -1.91450000 |
| C | 1.39130500  | -0.17307000 | -5.14407000 |
| H | 1.39405500  | 1.88739200  | -5.77834200 |
| H | 1.34148100  | -2.11242400 | -4.18337100 |
| H | 1.37236600  | -0.57204900 | -6.15319300 |
| C | 0.36550100  | -0.22034700 | 0.17938100  |
| C | -0.00241700 | -1.35846400 | 0.41362800  |
| C | -0.29282600 | -2.72972500 | 0.69778300  |
| C | 0.62441500  | -3.50375700 | 1.42558100  |
| C | -1.44078600 | -3.35093900 | 0.18741900  |
| C | 0.40973100  | -4.85683800 | 1.62726100  |
| H | 1.52281400  | -3.03434200 | 1.81770500  |
| C | -1.66704000 | -4.70078400 | 0.40201600  |
| H | -2.15025400 | -2.77132800 | -0.39892600 |
| C | -0.74109200 | -5.47915100 | 1.11518300  |
| H | 1.13316100  | -5.44732300 | 2.18205300  |
| H | -2.58099000 | -5.15477200 | 0.02690100  |
| C | 5.71994700  | -3.32918400 | -1.42632400 |
| C | 4.79428300  | -2.47010100 | -0.82650400 |
| C | 3.42784500  | -2.65059200 | -0.96568400 |
| C | 3.00803000  | -3.70288400 | -1.78334800 |
| C | 3.91113200  | -4.53694700 | -2.43384900 |

|    |            |             |             |
|----|------------|-------------|-------------|
| C  | 5.28236600 | -4.35656900 | -2.24695700 |
| C  | 7.12115600 | -2.99287300 | -0.96676900 |
| C  | 6.84619200 | -2.22104900 | 0.32642100  |
| C  | 5.55894900 | -1.43985900 | -0.02082200 |
| H  | 2.70678400 | -2.01939800 | -0.44926200 |
| H  | 3.54241800 | -5.34163300 | -3.05928000 |
| H  | 5.98734700 | -5.03364300 | -2.71825800 |
| H  | 7.73781900 | -3.87224100 | -0.77192600 |
| H  | 7.66374800 | -1.57065800 | 0.65957400  |
| H  | 5.79933400 | -0.55462600 | -0.61773000 |
| H  | 7.64458900 | -2.35201100 | -1.68444300 |
| Br | 1.15430600 | -4.02428400 | -1.99686900 |
| O  | 6.53457200 | -3.19606800 | 1.31063300  |
| C  | 6.17536100 | -2.66085500 | 2.56002600  |
| H  | 5.76845200 | -3.47195500 | 3.16534200  |
| H  | 7.04650500 | -2.23854600 | 3.07966500  |
| N  | 4.90598100 | -0.97691600 | 1.20474000  |
| C  | 4.10710700 | 0.09775200  | 1.43288900  |
| C  | 5.15969700 | -1.56490000 | 2.41211100  |
| N  | 4.54764000 | -0.93528300 | 3.37173500  |
| N  | 3.90528700 | 0.09409200  | 2.75821000  |
| C  | 3.21363300 | 1.02659200  | 3.62563900  |
| C  | 3.92760900 | 2.13163600  | 4.09971200  |
| C  | 1.93495200 | 0.69315100  | 4.06113600  |
| C  | 3.27336600 | 2.96775600  | 4.99784800  |
| C  | 1.32499000 | 1.56424000  | 4.96520100  |
| C  | 1.96792500 | 2.70840200  | 5.42879500  |
| H  | 3.79825100 | 3.84045100  | 5.37814200  |
| H  | 0.32070600 | 1.33413800  | 5.31181800  |
| C  | 1.27167400 | 3.65814500  | 6.36813300  |
| H  | 0.82744800 | 4.48913300  | 5.81091900  |
| H  | 0.46922400 | 3.15767100  | 6.91418600  |
| H  | 1.97148800 | 4.08398600  | 7.09109600  |
| C  | 1.25826800 | -0.56440200 | 3.59753500  |
| H  | 1.18625500 | -0.59116100 | 2.50796900  |
| H  | 1.81141900 | -1.44935600 | 3.93062300  |
| H  | 0.24418000 | -0.62448200 | 3.99802100  |
| C  | 5.34283700 | 2.39396700  | 3.66453400  |
| H  | 5.96594200 | 1.50254200  | 3.79093400  |
| H  | 5.36297000 | 2.67731800  | 2.60907400  |
| H  | 5.78049800 | 3.20098400  | 4.25393600  |
| C  | 4.34602800 | 2.04970100  | -1.89886100 |
| C  | 3.72994300 | 1.08601200  | -0.88070100 |
| H  | 4.23428700 | 1.56016800  | -2.87175700 |

|   |             |             |             |
|---|-------------|-------------|-------------|
| C | 3.78440600  | 1.27290200  | 0.51543300  |
| O | 3.53325000  | 2.31154000  | 1.14921500  |
| C | 3.89959100  | 3.49585200  | -2.08330200 |
| C | 3.81744200  | 3.98856800  | -3.39226400 |
| C | 3.65892400  | 4.38715200  | -1.03113200 |
| C | 3.49757400  | 5.31929300  | -3.64929800 |
| H | 3.99714000  | 3.31241900  | -4.22492700 |
| C | 3.33491100  | 5.71936000  | -1.28585200 |
| H | 3.71338600  | 4.02753000  | -0.01066400 |
| C | 3.25264300  | 6.19372100  | -2.59288300 |
| H | 3.43621900  | 5.67069300  | -4.67488600 |
| H | 3.14822100  | 6.39057900  | -0.45229900 |
| H | 3.00073300  | 7.23195300  | -2.78674700 |
| H | 3.82175300  | 0.05369000  | -1.21120400 |
| H | 5.42983300  | 2.07808200  | -1.71256200 |
| N | -0.93120900 | -6.84374600 | 1.26391900  |
| H | -1.88821700 | -7.15757400 | 1.18191600  |
| H | -0.45668600 | -7.26592400 | 2.04968400  |

TS4CNH-SS

|    |             |             |             |
|----|-------------|-------------|-------------|
| C  | -6.19542700 | -1.86419400 | 2.15975900  |
| C  | -5.29006700 | -1.14801000 | 1.37074200  |
| C  | -5.01165700 | -1.51427000 | 0.06095200  |
| C  | -5.70753500 | -2.61187100 | -0.44028800 |
| C  | -6.60487500 | -3.34789600 | 0.32665300  |
| C  | -6.84871500 | -2.97497200 | 1.64703100  |
| C  | -6.34609300 | -1.22774300 | 3.52063900  |
| C  | -5.85768300 | 0.19594300  | 3.25787300  |
| C  | -4.74054100 | -0.00460700 | 2.20453600  |
| H  | -4.33019900 | -0.96727600 | -0.58464400 |
| H  | -7.12547600 | -4.18915600 | -0.11670600 |
| H  | -7.56461700 | -3.52751900 | 2.24834100  |
| H  | -7.37285500 | -1.22066300 | 3.89235700  |
| H  | -5.50436700 | 0.73591900  | 4.14579800  |
| H  | -3.79879200 | -0.28887200 | 2.68595000  |
| H  | -5.70412700 | -1.71804100 | 4.26126200  |
| Br | -5.48537300 | -3.09659400 | -2.25695700 |
| O  | -6.95125200 | 0.87070200  | 2.65645500  |
| C  | -6.69028600 | 2.20195900  | 2.28397700  |
| H  | -7.51989400 | 2.54118900  | 1.66678400  |
| H  | -6.59088500 | 2.84763300  | 3.16825300  |
| N  | -4.51059500 | 1.26936600  | 1.52095100  |
| C  | -3.42853600 | 1.69909400  | 0.86243300  |
| C  | -5.42046000 | 2.29012500  | 1.49647100  |

|   |             |             |             |
|---|-------------|-------------|-------------|
| N | -4.94401600 | 3.32364500  | 0.86342100  |
| N | -3.70164800 | 2.93169000  | 0.46589400  |
| C | -2.80787500 | 3.89704700  | -0.12386100 |
| C | -2.95890000 | 4.25086200  | -1.46395200 |
| C | -1.87722400 | 4.50064400  | 0.73115200  |
| C | -2.10888500 | 5.24754100  | -1.95400600 |
| C | -1.07431400 | 5.50235700  | 0.19717800  |
| C | -1.17463800 | 5.88800200  | -1.14346200 |
| H | -2.20613200 | 5.54338400  | -2.99604800 |
| H | -0.36696200 | 6.00452600  | 0.85199900  |
| C | -0.28815200 | 6.97227400  | -1.70045700 |
| H | 0.03152700  | 7.66299000  | -0.91594100 |
| H | 0.61240800  | 6.54468500  | -2.15528200 |
| H | -0.80437400 | 7.54465300  | -2.47433500 |
| C | -1.74441000 | 4.08197700  | 2.16962800  |
| H | -2.71887900 | 4.02544900  | 2.66476700  |
| H | -1.26771900 | 3.09844600  | 2.22266100  |
| H | -1.12285600 | 4.79324400  | 2.71588900  |
| C | -3.99465900 | 3.63652900  | -2.36668600 |
| H | -4.52682100 | 2.80357700  | -1.90865300 |
| H | -4.73399600 | 4.39062600  | -2.65376400 |
| H | -3.51685000 | 3.28273300  | -3.28605100 |
| H | -2.46922800 | 1.19944000  | 0.73955000  |
| B | -6.72817400 | 1.04367400  | -1.42822100 |
| F | -5.35493600 | 1.08599400  | -1.07148000 |
| F | -6.94657700 | 1.95206100  | -2.46320300 |
| F | -7.48209300 | 1.40346200  | -0.30118100 |
| F | -7.05196400 | -0.25099200 | -1.83157400 |
| N | -2.66223600 | -1.02065000 | -2.56796700 |
| C | -1.50642000 | -1.90627900 | -2.49079200 |
| C | -1.83278800 | -3.37385200 | -2.74142600 |
| H | -1.10463400 | -1.81732900 | -1.47740400 |
| H | -0.69644600 | -1.59396900 | -3.18033400 |
| H | -0.97424800 | -3.98882500 | -2.45434400 |
| H | -2.70303800 | -3.66507900 | -2.14718400 |
| H | -2.05882400 | -3.58239800 | -3.79140800 |
| C | -3.24630900 | -0.98286300 | -3.90273100 |
| C | -4.46944800 | -0.07955100 | -3.98896500 |
| H | -3.55518600 | -2.00331800 | -4.15258700 |
| H | -2.49692500 | -0.68784700 | -4.66432400 |
| H | -4.95362700 | -0.20596200 | -4.96173400 |
| H | -5.18384400 | -0.33334300 | -3.20227300 |
| H | -4.21195800 | 0.97835300  | -3.88077500 |
| C | -2.35988100 | 0.30015700  | -2.01691000 |

|   |             |             |             |
|---|-------------|-------------|-------------|
| C | -1.37597200 | 1.17096500  | -2.80585500 |
| H | -1.94707600 | 0.12639700  | -1.01706600 |
| H | -3.30493600 | 0.83703000  | -1.88498400 |
| H | -1.23199300 | 2.12255600  | -2.28229700 |
| H | -0.39647100 | 0.68731500  | -2.89603900 |
| H | -1.74564400 | 1.38627000  | -3.81427900 |
| C | 1.55441000  | -0.98774700 | -0.69483900 |
| C | 0.53271100  | -0.34309100 | 0.03213300  |
| H | 1.96960600  | -0.35859000 | -1.48355800 |
| C | 0.37793800  | 1.08090600  | -0.10925900 |
| H | 1.12738400  | 1.56447100  | -0.76596900 |
| O | -0.52881500 | 1.75850100  | 0.38100500  |
| C | 1.54696300  | -2.42016000 | -1.09494200 |
| C | 1.91444700  | -2.73893900 | -2.41085600 |
| C | 1.18871600  | -3.46684200 | -0.23398700 |
| C | 1.95053200  | -4.05868900 | -2.85140800 |
| H | 2.14765900  | -1.93401100 | -3.10573000 |
| C | 1.22647800  | -4.78705800 | -0.67452200 |
| H | 0.88027100  | -3.24694500 | 0.78091300  |
| C | 1.61443200  | -5.09085100 | -1.97855100 |
| H | 2.23283800  | -4.27731600 | -3.87635600 |
| H | 0.95055400  | -5.58358000 | 0.00895500  |
| H | 1.64327600  | -6.12212500 | -2.31420000 |
| C | -0.40431200 | -1.04017200 | 0.84406900  |
| C | -1.21791300 | -1.67321500 | 1.49125700  |
| C | -2.16318500 | -2.52623200 | 2.14089600  |
| C | -2.49863900 | -2.37968500 | 3.49407900  |
| C | -2.78988600 | -3.54668200 | 1.40368000  |
| C | -3.45880100 | -3.19241100 | 4.07976400  |
| H | -2.00470400 | -1.61383500 | 4.08492100  |
| C | -3.74020900 | -4.36451100 | 1.98584800  |
| H | -2.52547900 | -3.67049200 | 0.35694100  |
| C | -4.11271300 | -4.18116500 | 3.32817700  |
| H | -3.71362800 | -3.06345500 | 5.12835900  |
| H | -4.23255300 | -5.13177100 | 1.39555000  |
| C | 6.72416000  | -2.49201500 | -2.42334500 |
| C | 6.15945000  | -1.60855100 | -1.50087700 |
| C | 6.65344500  | -1.48032200 | -0.21069400 |
| C | 7.73094800  | -2.29276400 | 0.13785100  |
| C | 8.29693300  | -3.19734200 | -0.75539700 |
| C | 7.79158500  | -3.29646900 | -2.05144800 |
| C | 6.02599900  | -2.37873900 | -3.75903800 |
| C | 5.35396200  | -1.00739100 | -3.66370500 |
| C | 4.99087000  | -0.90825900 | -2.16428100 |



|    |            |             |             |
|----|------------|-------------|-------------|
| H  | 6.23022200 | -0.78562400 | 0.51007300  |
| H  | 9.13514400 | -3.80879700 | -0.44240200 |
| H  | 8.24347900 | -3.98502400 | -2.75786600 |
| H  | 6.70174500 | -2.42081600 | -4.61534500 |
| H  | 4.47888400 | -0.88637000 | -4.31479600 |
| H  | 4.05550100 | -1.44586900 | -1.98581300 |
| H  | 5.26576300 | -3.15933000 | -3.87645600 |
| Br | 8.45768600 | -2.15673100 | 1.88257300  |
| O  | 6.34303800 | -0.03910200 | -3.97106900 |
| C  | 5.86179100 | 1.28093600  | -3.89444100 |
| H  | 6.70376700 | 1.95762000  | -4.04272700 |
| H  | 5.10931500 | 1.47655600  | -4.67106600 |
| N  | 4.79033500 | 0.49172700  | -1.77930000 |
| C  | 4.18304300 | 1.03497900  | -0.69445300 |
| C  | 5.23840900 | 1.52886600  | -2.55316000 |
| N  | 4.96446600 | 2.67466900  | -2.00285400 |
| N  | 4.31030900 | 2.35474100  | -0.85381000 |
| C  | 3.89095300 | 3.43030900  | 0.00970800  |
| C  | 2.87719500 | 4.26877900  | -0.44386600 |
| C  | 4.55764800 | 3.60705300  | 1.22867600  |
| C  | 2.54431900 | 5.35432300  | 0.36954000  |
| C  | 4.17433700 | 4.69543900  | 2.00347600  |
| C  | 3.17261700 | 5.58089300  | 1.58959200  |
| H  | 1.76863700 | 6.03485700  | 0.02921800  |
| H  | 4.67007500 | 4.85886700  | 2.95709500  |
| C  | 2.76339700 | 6.73516000  | 2.46665800  |
| H  | 2.13991900 | 6.38365500  | 3.29501500  |
| H  | 3.63550500 | 7.23065800  | 2.90039100  |
| H  | 2.18859800 | 7.47482300  | 1.90472100  |
| C  | 5.60893800 | 2.64109000  | 1.70696800  |
| H  | 5.13695800 | 1.73477000  | 2.10703400  |
| H  | 6.29006300 | 2.34587200  | 0.90255600  |
| H  | 6.20200500 | 3.09027900  | 2.50514600  |
| C  | 2.13020000 | 4.04509200  | -1.73377500 |
| H  | 2.32326500 | 3.06253400  | -2.16847600 |
| H  | 1.05342500 | 4.12869700  | -1.54989800 |
| H  | 2.40927200 | 4.79527700  | -2.48014900 |
| C  | 2.86917600 | -1.52806200 | 1.87932700  |
| C  | 3.31390300 | -0.99196300 | 0.53460600  |
| H  | 2.90171800 | -2.62132200 | 1.85698500  |
| C  | 3.42719500 | 0.40935900  | 0.45063900  |
| O  | 2.78382800 | 1.19630300  | 1.16370700  |
| C  | 3.75576900 | -1.00330600 | 2.99259800  |
| C  | 5.06930200 | -1.46013200 | 3.14195000  |

|   |             |             |             |
|---|-------------|-------------|-------------|
| C | 3.29325200  | -0.00260800 | 3.85070500  |
| C | 5.89874600  | -0.92998500 | 4.12788000  |
| H | 5.45015300  | -2.23672300 | 2.47997300  |
| C | 4.11912100  | 0.52733300  | 4.83954400  |
| H | 2.28323100  | 0.37343900  | 3.72074600  |
| C | 5.42556900  | 0.06544000  | 4.98084300  |
| H | 6.91568600  | -1.29504600 | 4.22672700  |
| H | 3.74287900  | 1.30676800  | 5.49503600  |
| H | 6.07200300  | 0.47799100  | 5.74893300  |
| H | 4.00156400  | -1.62189700 | -0.01559400 |
| H | 1.83543300  | -1.22324300 | 2.07454600  |
| N | -5.07490800 | -4.99476900 | 3.90758200  |
| H | -5.74154700 | -5.39015300 | 3.25820000  |
| H | -5.52694800 | -4.61233500 | 4.72698700  |

TS4CNH-RR

|    |             |             |             |
|----|-------------|-------------|-------------|
| C  | -0.84778400 | -4.36414600 | 0.89540200  |
| C  | -1.31274500 | -3.05891300 | 0.73309300  |
| C  | -1.18303300 | -2.38433000 | -0.47646800 |
| C  | -0.55623200 | -3.06581900 | -1.51506000 |
| C  | -0.10830500 | -4.37983500 | -1.38437100 |
| C  | -0.25243700 | -5.03578100 | -0.16560900 |
| C  | -1.05871000 | -4.85307100 | 2.30669700  |
| C  | -2.00840700 | -3.81840800 | 2.92194200  |
| C  | -1.79567700 | -2.53835800 | 2.06859000  |
| H  | -1.55396300 | -1.37669600 | -0.65153000 |
| H  | 0.35164000  | -4.87849400 | -2.23119600 |
| H  | 0.09463300  | -6.05789000 | -0.05280600 |
| H  | -1.51430300 | -5.84489700 | 2.35877900  |
| H  | -1.80955500 | -3.62415900 | 3.98448200  |
| H  | -1.02952000 | -1.88914800 | 2.50494000  |
| H  | -0.11245300 | -4.89481400 | 2.85705600  |
| Br | -0.25176000 | -2.16080600 | -3.14486300 |
| O  | -3.32392500 | -4.31550700 | 2.76918300  |
| C  | -4.29356000 | -3.45332300 | 3.31842500  |
| H  | -5.27257200 | -3.88986600 | 3.13827200  |
| H  | -4.12902500 | -3.31285900 | 4.39668500  |
| N  | -3.02800700 | -1.74824500 | 2.04587500  |
| C  | -3.25086700 | -0.55866700 | 1.48219800  |
| C  | -4.20872100 | -2.13615400 | 2.61744600  |
| N  | -5.12241100 | -1.22057600 | 2.47407600  |
| N  | -4.50457900 | -0.24395900 | 1.75537800  |
| C  | -5.17421700 | 0.98374700  | 1.43469500  |
| C  | -6.38238800 | 0.91098600  | 0.73098900  |

|   |             |             |             |
|---|-------------|-------------|-------------|
| C | -4.59808700 | 2.18514800  | 1.86220600  |
| C | -7.02778600 | 2.11640200  | 0.46440100  |
| C | -5.28091000 | 3.35966800  | 1.54482100  |
| C | -6.48945600 | 3.34496900  | 0.85246600  |
| H | -7.96444500 | 2.09299500  | -0.08803700 |
| H | -4.84776400 | 4.30981000  | 1.84487600  |
| C | -7.20057400 | 4.62727700  | 0.50909700  |
| H | -8.23392400 | 4.61229100  | 0.86699100  |
| H | -6.69264100 | 5.48952500  | 0.94650500  |
| H | -7.23308400 | 4.76798000  | -0.57674400 |
| C | -3.31401100 | 2.23852800  | 2.65244700  |
| H | -3.31485800 | 1.50264200  | 3.46352400  |
| H | -2.43038300 | 2.04274900  | 2.03427100  |
| H | -3.19664700 | 3.23088300  | 3.09161200  |
| C | -6.94063000 | -0.39697800 | 0.23833200  |
| H | -6.16092100 | -1.04058000 | -0.17707500 |
| H | -7.41070500 | -0.95759900 | 1.05139200  |
| H | -7.69149300 | -0.21292800 | -0.53279600 |
| H | -2.52840500 | 0.05487300  | 0.96125700  |
| B | -5.18463600 | -3.57124100 | -0.34098100 |
| F | -4.36877700 | -2.42444900 | -0.18063200 |
| F | -6.29265100 | -3.22234200 | -1.12306200 |
| F | -5.62388000 | -3.98922400 | 0.92473700  |
| F | -4.44789700 | -4.57799400 | -0.95363800 |
| N | -2.92899200 | -0.11048900 | -2.89714600 |
| C | -2.05986900 | 0.91276300  | -3.46388600 |
| C | -2.60649700 | 1.80209300  | -4.59024000 |
| H | -1.16436900 | 0.39996200  | -3.84151300 |
| H | -1.71620800 | 1.54171400  | -2.63632900 |
| H | -1.78533900 | 2.38863200  | -5.01376500 |
| H | -3.04024400 | 1.20622300  | -5.39905200 |
| H | -3.36779900 | 2.50595800  | -4.24348800 |
| C | -3.43187000 | -1.04746900 | -3.89259000 |
| C | -3.94701600 | -2.33801600 | -3.27293000 |
| H | -2.59291400 | -1.28018800 | -4.55954900 |
| H | -4.21884300 | -0.60338300 | -4.52869400 |
| H | -4.21538800 | -3.04913800 | -4.06046600 |
| H | -3.17821600 | -2.78941300 | -2.64071500 |
| H | -4.82904700 | -2.18341200 | -2.64723400 |
| C | -3.93473200 | 0.36816500  | -1.95194100 |
| C | -5.22662100 | 0.93977100  | -2.55310600 |
| H | -3.44845600 | 1.12883700  | -1.32383900 |
| H | -4.19991400 | -0.46601000 | -1.28935900 |
| H | -5.82954600 | 1.40419000  | -1.76899400 |

|   |             |             |             |
|---|-------------|-------------|-------------|
| H | -5.02715000 | 1.69749100  | -3.31523700 |
| H | -5.82752600 | 0.15017600  | -3.01592900 |
| C | 1.42267700  | 0.66980900  | -1.10751800 |
| C | 0.37360300  | 0.94273600  | -0.19858500 |
| H | 1.84397000  | -0.32761600 | -0.97369200 |
| C | 0.28468800  | 0.11904600  | 0.97580400  |
| H | 1.07153500  | -0.65987000 | 1.04739700  |
| O | -0.59136700 | 0.17316400  | 1.84686100  |
| C | 1.46382500  | 1.08229900  | -2.53547800 |
| C | 2.11550600  | 0.23636500  | -3.44437900 |
| C | 0.88905900  | 2.26376400  | -3.02507200 |
| C | 2.17760700  | 0.54601900  | -4.79857300 |
| H | 2.54670600  | -0.69463200 | -3.08766900 |
| C | 0.96660900  | 2.58209700  | -4.37812900 |
| H | 0.37400100  | 2.93430200  | -2.34748100 |
| C | 1.60229700  | 1.72352500  | -5.27216900 |
| H | 2.67290100  | -0.13516700 | -5.48315000 |
| H | 0.52031000  | 3.50543200  | -4.73429300 |
| H | 1.65110400  | 1.97096900  | -6.32767700 |
| C | -0.56415600 | 2.00975600  | -0.28672300 |
| C | -1.40423600 | 2.89190000  | -0.28626400 |
| C | -2.34276400 | 3.97443400  | -0.30697500 |
| C | -3.34829400 | 4.05113700  | -1.28377500 |
| C | -2.26068200 | 5.00803600  | 0.64005400  |
| C | -4.23329700 | 5.11679000  | -1.31723900 |
| H | -3.42957200 | 3.25978800  | -2.02343100 |
| C | -3.14059500 | 6.07882800  | 0.60898800  |
| H | -1.48799100 | 4.96420600  | 1.40140900  |
| C | -4.14198000 | 6.15291300  | -0.37351500 |
| H | -5.00145400 | 5.15896500  | -2.08470700 |
| H | -3.05503300 | 6.87413800  | 1.34419100  |
| C | 6.93262800  | -0.87154600 | -1.76310200 |
| C | 5.82683000  | -0.51103400 | -0.99733200 |
| C | 4.63837000  | -1.21129000 | -1.05054600 |
| C | 4.55584800  | -2.28655700 | -1.92535700 |
| C | 5.62444500  | -2.64485500 | -2.74083200 |
| C | 6.82629800  | -1.93279000 | -2.65461700 |
| C | 8.11750000  | -0.01456300 | -1.36963000 |
| C | 7.72924600  | 0.45643000  | 0.04207000  |
| C | 6.18985400  | 0.61568000  | -0.05905600 |
| H | 3.79304100  | -0.96232500 | -0.41951100 |
| H | 5.53339800  | -3.48702000 | -3.41702200 |
| H | 7.67296700  | -2.23723900 | -3.26115500 |
| H | 9.06402200  | -0.55756700 | -1.34264400 |

|    |             |             |             |
|----|-------------|-------------|-------------|
| H  | 8.22470600  | 1.37931900  | 0.36525100  |
| H  | 5.92741900  | 1.60829300  | -0.44016700 |
| H  | 8.23049300  | 0.84616900  | -2.03711100 |
| Br | 2.91715500  | -3.23451200 | -1.92836000 |
| O  | 8.05039300  | -0.61560100 | 0.91482000  |
| C  | 7.64144100  | -0.39974400 | 2.24638100  |
| H  | 7.90957100  | -1.27962300 | 2.83072400  |
| H  | 8.13558400  | 0.48189900  | 2.67739000  |
| N  | 5.53318300  | 0.42677500  | 1.23705900  |
| C  | 4.21645000  | 0.51817200  | 1.54753500  |
| C  | 6.15797200  | -0.19746500 | 2.28146500  |
| N  | 5.30819800  | -0.50708000 | 3.21702100  |
| N  | 4.11109900  | -0.05973600 | 2.74822200  |
| C  | 2.90631300  | -0.40384300 | 3.46054600  |
| C  | 2.43754600  | 0.47122400  | 4.44092300  |
| C  | 2.30879400  | -1.62937200 | 3.15958300  |
| C  | 1.27020100  | 0.10812000  | 5.10577300  |
| C  | 1.15786600  | -1.95447300 | 3.87751100  |
| C  | 0.61079300  | -1.09014500 | 4.82583600  |
| H  | 0.86567300  | 0.77734600  | 5.86013700  |
| H  | 0.68344500  | -2.91541500 | 3.69067000  |
| C  | -0.68101400 | -1.43256900 | 5.51898100  |
| H  | -0.79936200 | -0.86480600 | 6.44380700  |
| H  | -1.53297500 | -1.18714300 | 4.87229500  |
| H  | -0.73546900 | -2.49767600 | 5.75957300  |
| C  | 2.85860400  | -2.56874500 | 2.11359100  |
| H  | 2.47733300  | -2.33985600 | 1.10941900  |
| H  | 3.95096900  | -2.54216400 | 2.07018500  |
| H  | 2.55565000  | -3.59405900 | 2.33602800  |
| C  | 3.16746500  | 1.74991600  | 4.74192400  |
| H  | 4.20475600  | 1.55041800  | 5.02821900  |
| H  | 3.17529200  | 2.38675300  | 3.85253700  |
| H  | 2.68196400  | 2.28669800  | 5.55795300  |
| C  | 2.78348800  | 3.17625600  | -0.73126600 |
| C  | 3.15432700  | 1.72788400  | -0.45397400 |
| H  | 1.78191200  | 3.37660100  | -0.33612700 |
| C  | 3.14522700  | 1.38849300  | 0.91983900  |
| O  | 2.28741000  | 1.80056800  | 1.71769800  |
| C  | 3.79441400  | 4.09473300  | -0.07989600 |
| C  | 5.01899700  | 4.35595200  | -0.70426300 |
| C  | 3.55679100  | 4.63946800  | 1.18583200  |
| C  | 5.98877800  | 5.13428900  | -0.07683300 |
| H  | 5.20767800  | 3.94782000  | -1.69552000 |
| C  | 4.52494300  | 5.41983100  | 1.81506900  |

|   |             |            |             |
|---|-------------|------------|-------------|
| H | 2.60944800  | 4.43582700 | 1.67634900  |
| C | 5.74442900  | 5.66718200 | 1.18821600  |
| H | 6.93136400  | 5.33201000 | -0.57803800 |
| H | 4.32464400  | 5.83777800 | 2.79693400  |
| H | 6.49686200  | 6.27680000 | 1.67801200  |
| H | 3.92892700  | 1.31525000 | -1.09351500 |
| H | 2.76773500  | 3.34965800 | -1.80898300 |
| N | -4.98030200 | 7.25575800 | -0.44833900 |
| H | -5.10157600 | 7.77091200 | 0.41264300  |
| H | -5.85617100 | 7.10358900 | -0.92923900 |

TS4CNH-SR

|    |            |             |             |
|----|------------|-------------|-------------|
| C  | 1.61049600 | -4.59473400 | 0.57007700  |
| C  | 1.93205000 | -3.26340300 | 0.30129000  |
| C  | 2.17563600 | -2.34531600 | 1.31599900  |
| C  | 2.09465900 | -2.81990500 | 2.62209500  |
| C  | 1.75600000 | -4.13785600 | 2.91741300  |
| C  | 1.50848300 | -5.03644900 | 1.88207900  |
| C  | 1.42650600 | -5.37347100 | -0.71193900 |
| C  | 2.12595100 | -4.49842300 | -1.75750800 |
| C  | 1.93968900 | -3.06720800 | -1.19942300 |
| H  | 2.47800700 | -1.31707900 | 1.13594700  |
| H  | 1.70997700 | -4.46048700 | 3.95111000  |
| H  | 1.26347900 | -6.06979100 | 2.10563400  |
| H  | 1.87240800 | -6.37014000 | -0.68901600 |
| H  | 1.70820800 | -4.59355800 | -2.76902200 |
| H  | 0.99668500 | -2.66046000 | -1.57010400 |
| H  | 0.36351800 | -5.47906200 | -0.95832800 |
| Br | 2.50915200 | -1.65366400 | 4.05619500  |
| O  | 3.49422700 | -4.85323300 | -1.76071900 |
| C  | 4.26498200 | -4.09516000 | -2.66406300 |
| H  | 5.30709500 | -4.37490700 | -2.52654000 |
| H  | 3.95641100 | -4.28593400 | -3.70194400 |
| N  | 2.99596000 | -2.19367900 | -1.70353100 |
| C  | 3.11169700 | -0.86828600 | -1.60010500 |
| C  | 4.10715000 | -2.63597400 | -2.36468400 |
| N  | 4.86898800 | -1.63812800 | -2.71234400 |
| N  | 4.23254100 | -0.54009600 | -2.21925000 |
| C  | 4.74813400 | 0.78211400  | -2.44205500 |
| C  | 6.06056400 | 1.06415900  | -2.04248800 |
| C  | 3.92048800 | 1.71474400  | -3.08058200 |
| C  | 6.53572500 | 2.34960400  | -2.30080300 |
| C  | 4.45316600 | 2.98384000  | -3.30676200 |
| C  | 5.74876200 | 3.32241000  | -2.91726900 |

|   |             |             |             |
|---|-------------|-------------|-------------|
| H | 7.54596700  | 2.60017400  | -1.98751100 |
| H | 3.83946400  | 3.72412100  | -3.81485600 |
| C | 6.26314200  | 4.72422800  | -3.10952400 |
| H | 7.34714600  | 4.73696400  | -3.24056800 |
| H | 5.80023800  | 5.20148100  | -3.97645200 |
| H | 6.02763400  | 5.33330400  | -2.22924900 |
| C | 2.51731300  | 1.38696800  | -3.52889100 |
| H | 2.46495000  | 0.40931500  | -4.01741200 |
| H | 1.80577500  | 1.36458900  | -2.69397300 |
| H | 2.17309100  | 2.13986400  | -4.24142400 |
| C | 6.92694600  | 0.05311000  | -1.34116900 |
| H | 6.36041400  | -0.53993100 | -0.62044000 |
| H | 7.36632300  | -0.64639800 | -2.05862200 |
| H | 7.74000900  | 0.56332400  | -0.82070000 |
| H | 2.41522900  | -0.18970900 | -1.12629600 |
| B | 5.62639800  | -2.78934700 | 0.71008100  |
| F | 4.81392300  | -1.70427500 | 0.28921700  |
| F | 6.92366300  | -2.31737900 | 0.92398100  |
| F | 5.63795800  | -3.75007800 | -0.31189400 |
| F | 5.09733800  | -3.33236400 | 1.87747900  |
| N | 3.64191900  | 1.08211300  | 2.37384500  |
| C | 2.55506500  | 1.83716300  | 2.98805300  |
| C | 2.90555000  | 3.14222000  | 3.71656800  |
| H | 2.06142800  | 1.17215500  | 3.71189200  |
| H | 1.81508100  | 2.03998100  | 2.20744500  |
| H | 1.98775500  | 3.58004600  | 4.12496800  |
| H | 3.58321200  | 2.96198800  | 4.55637700  |
| H | 3.36894700  | 3.88139700  | 3.05798000  |
| C | 4.78013200  | 0.90608400  | 3.26355800  |
| C | 5.71658100  | -0.21251300 | 2.83357400  |
| H | 4.36817100  | 0.65666500  | 4.25123500  |
| H | 5.35312100  | 1.84191500  | 3.40090100  |
| H | 6.52385100  | -0.32005600 | 3.56510800  |
| H | 5.17674200  | -1.15898200 | 2.76202700  |
| H | 6.17650300  | -0.02410900 | 1.86054800  |
| C | 3.96532100  | 1.43812500  | 0.99742400  |
| C | 4.67296400  | 2.77550800  | 0.75204900  |
| H | 3.01716800  | 1.44764200  | 0.44404000  |
| H | 4.56556400  | 0.62091000  | 0.57745300  |
| H | 4.82247800  | 2.91872800  | -0.32267400 |
| H | 4.07397100  | 3.61718500  | 1.11057400  |
| H | 5.65464100  | 2.80903300  | 1.23783900  |
| C | -0.98282200 | -0.17076700 | 1.40076300  |
| C | -0.29967100 | 0.19879200  | 0.22501900  |

|    |             |             |             |
|----|-------------|-------------|-------------|
| H  | -1.16723800 | -1.24210000 | 1.50438100  |
| C  | -0.26435600 | -0.75304100 | -0.84165600 |
| H  | -0.71366500 | -1.73742900 | -0.58494700 |
| O  | 0.19859600  | -0.56956400 | -1.97764000 |
| C  | -0.85599300 | 0.56276600  | 2.67380000  |
| C  | -0.57726400 | -0.17310800 | 3.82952700  |
| C  | -0.99919600 | 1.95528700  | 2.77107100  |
| C  | -0.39329700 | 0.46964400  | 5.05170500  |
| H  | -0.45531400 | -1.25032700 | 3.75978500  |
| C  | -0.83723700 | 2.59214700  | 3.99439000  |
| H  | -1.24631600 | 2.53781800  | 1.88837600  |
| C  | -0.52404400 | 1.85172600  | 5.13735700  |
| H  | -0.14732800 | -0.11455100 | 5.93261700  |
| H  | -0.95748500 | 3.66917400  | 4.06057600  |
| H  | -0.38814100 | 2.35485200  | 6.08921100  |
| C  | 0.29225600  | 1.47422700  | 0.01916700  |
| C  | 0.77436500  | 2.58092500  | -0.13481000 |
| C  | 1.41530400  | 3.85576700  | -0.17730000 |
| C  | 2.05272700  | 4.31663600  | -1.33793600 |
| C  | 1.47078800  | 4.65359500  | 0.97813400  |
| C  | 2.75404200  | 5.51057900  | -1.33912000 |
| H  | 2.00500400  | 3.71706000  | -2.24065600 |
| C  | 2.16536200  | 5.85174600  | 0.97923300  |
| H  | 0.98226500  | 4.30683100  | 1.88507200  |
| C  | 2.83323800  | 6.29483800  | -0.17605900 |
| H  | 3.25156400  | 5.84728500  | -2.24499100 |
| H  | 2.20888900  | 6.45146100  | 1.88387900  |
| C  | -3.70291700 | 4.10431000  | -1.12396100 |
| C  | -3.93978100 | 2.74500000  | -0.90557100 |
| C  | -5.16862700 | 2.27534000  | -0.46509900 |
| C  | -6.15963600 | 3.22354900  | -0.21998100 |
| C  | -5.94489800 | 4.58490300  | -0.41127600 |
| C  | -4.70545700 | 5.03048300  | -0.87247300 |
| C  | -2.29861100 | 4.31854900  | -1.64443500 |
| C  | -1.91837200 | 2.93082400  | -2.16356300 |
| C  | -2.65941000 | 1.98834300  | -1.18702500 |
| H  | -5.36596800 | 1.21887100  | -0.30361800 |
| H  | -6.74398000 | 5.28913900  | -0.21115900 |
| H  | -4.54037600 | 6.08972000  | -1.04066700 |
| H  | -2.23221800 | 5.06373900  | -2.43962000 |
| H  | -0.84081700 | 2.73086500  | -2.18117200 |
| H  | -2.06225800 | 1.87355900  | -0.28098000 |
| H  | -1.61267300 | 4.60953200  | -0.83941600 |
| Br | -7.85188800 | 2.63480000  | 0.39881100  |



|   |             |             |             |
|---|-------------|-------------|-------------|
| O | -2.47335600 | 2.79781900  | -3.46342700 |
| C | -2.18928900 | 1.54229000  | -4.03123600 |
| H | -2.68744800 | 1.48093400  | -4.99893200 |
| H | -1.10741500 | 1.40367300  | -4.17256200 |
| N | -2.82839400 | 0.66171900  | -1.78568300 |
| C | -3.16615400 | -0.52673000 | -1.23171200 |
| C | -2.68421800 | 0.45244300  | -3.13011900 |
| N | -2.95940900 | -0.77988800 | -3.44401700 |
| N | -3.25432700 | -1.37565900 | -2.26143000 |
| C | -3.69863300 | -2.74574300 | -2.26696200 |
| C | -2.82169800 | -3.71536400 | -2.75077600 |
| C | -4.99787200 | -3.02874400 | -1.82645300 |
| C | -3.27942900 | -5.03453500 | -2.76538800 |
| C | -5.40097700 | -4.35934800 | -1.86877100 |
| C | -4.55658700 | -5.37497100 | -2.32656200 |
| H | -2.61349700 | -5.81258400 | -3.13007600 |
| H | -6.40402900 | -4.61050100 | -1.53277000 |
| C | -5.02114800 | -6.80784400 | -2.32456700 |
| H | -4.37041400 | -7.43647900 | -2.93533700 |
| H | -5.02011500 | -7.21038500 | -1.30683000 |
| H | -6.04149200 | -6.88999600 | -2.70744500 |
| C | -5.92803600 | -1.96506800 | -1.30428300 |
| H | -5.69953600 | -1.72731100 | -0.25774900 |
| H | -5.86629900 | -1.04299900 | -1.89119300 |
| H | -6.95980100 | -2.31870500 | -1.34056600 |
| C | -1.44188000 | -3.38449000 | -3.25883000 |
| H | -1.47088100 | -3.16931300 | -4.33153700 |
| H | -1.00760400 | -2.50560500 | -2.77438900 |
| H | -0.77860500 | -4.24017500 | -3.10973400 |
| C | -3.70567500 | -0.51077600 | 2.59024200  |
| C | -3.24231600 | -0.02222200 | 1.23661300  |
| H | -3.63908700 | 0.30688200  | 3.31469400  |
| C | -3.24304800 | -0.97724400 | 0.21002200  |
| O | -3.15441800 | -2.20749400 | 0.37518800  |
| C | -5.12731400 | -1.02754800 | 2.47935400  |
| C | -5.39016500 | -2.39876900 | 2.50888000  |
| C | -6.18879600 | -0.14593900 | 2.24116500  |
| C | -6.68341800 | -2.88169600 | 2.31227900  |
| H | -4.56771300 | -3.08946900 | 2.66707300  |
| C | -7.48026800 | -0.62543000 | 2.04101100  |
| H | -6.00198900 | 0.92636400  | 2.19983300  |
| C | -7.73213800 | -1.99690100 | 2.07709500  |
| H | -6.86761000 | -3.95143800 | 2.33501400  |
| H | -8.28829000 | 0.07370500  | 1.85118600  |

|   |             |             |             |
|---|-------------|-------------|-------------|
| H | -8.73876900 | -2.37082100 | 1.91935100  |
| H | -3.42233500 | 1.02134000  | 1.01093900  |
| H | -3.05560400 | -1.31819400 | 2.94723300  |
| N | 3.50016600  | 7.50866900  | -0.18660600 |
| H | 4.22255700  | 7.59926300  | -0.88761300 |
| H | 3.80315600  | 7.84437800  | 0.71711300  |

R2NO

|   |             |             |             |
|---|-------------|-------------|-------------|
| C | 3.52529700  | 1.16513300  | -0.00548500 |
| C | 2.34489900  | 1.83410200  | -0.01084100 |
| H | 4.41058700  | 1.80101900  | -0.02446700 |
| C | 2.41849100  | 3.31940900  | -0.03030500 |
| H | 3.45028300  | 3.72160100  | -0.03861800 |
| O | 1.45528800  | 4.05058500  | -0.03654000 |
| C | 3.82068400  | -0.26183100 | 0.01591200  |
| C | 5.17186300  | -0.63935900 | -0.06846500 |
| C | 2.84503700  | -1.26818900 | 0.12036100  |
| C | 5.54119800  | -1.97793100 | -0.05868400 |
| H | 5.93312100  | 0.13196200  | -0.14450300 |
| C | 3.21818600  | -2.60561100 | 0.13277600  |
| H | 1.79896700  | -1.00106200 | 0.19768700  |
| C | 4.56296700  | -2.96530000 | 0.04149200  |
| H | 6.58868300  | -2.25100700 | -0.12697500 |
| H | 2.45640300  | -3.37358600 | 0.21587800  |
| H | 4.84654900  | -4.01257300 | 0.05113100  |
| C | 1.03350500  | 1.27888600  | -0.00806900 |
| C | -0.12041400 | 0.90698800  | -0.01136000 |
| C | -1.47873200 | 0.46320300  | -0.01209200 |
| C | -1.77922200 | -0.90499600 | -0.11348200 |
| C | -2.51735600 | 1.40348800  | 0.08988900  |
| C | -3.09811100 | -1.33119700 | -0.11205500 |
| H | -0.97451100 | -1.62662900 | -0.19494100 |
| C | -3.83885800 | 0.98545500  | 0.09234400  |
| H | -2.27572900 | 2.45711900  | 0.16663600  |
| C | -4.10181800 | -0.37552100 | -0.00846300 |
| H | -3.35581700 | -2.37956600 | -0.18908100 |
| H | -4.65660200 | 1.69026900  | 0.17022200  |
| N | -5.49890100 | -0.82342000 | -0.00566800 |
| O | -6.36869800 | 0.02476600  | 0.09022500  |
| O | -5.71350600 | -2.01959900 | -0.09920100 |

TS4CNO-RS

|   |            |            |            |
|---|------------|------------|------------|
| C | 3.82805900 | 1.23834100 | 3.31557700 |
| C | 3.46354500 | 0.59574500 | 2.12888000 |

|    |             |             |             |
|----|-------------|-------------|-------------|
| C  | 3.79020200  | 1.11260700  | 0.88621700  |
| C  | 4.51002800  | 2.30413700  | 0.87111200  |
| C  | 4.87613300  | 2.97330700  | 2.03287700  |
| C  | 4.53011600  | 2.43416500  | 3.27311000  |
| C  | 3.35947400  | 0.44467700  | 4.51522700  |
| C  | 3.11124700  | -0.94409300 | 3.92058200  |
| C  | 2.65728500  | -0.63387800 | 2.47668100  |
| H  | 3.54017800  | 0.61487700  | -0.04608500 |
| H  | 5.43603900  | 3.89915700  | 1.96818300  |
| H  | 4.82426600  | 2.94184000  | 4.18625600  |
| H  | 4.09309700  | 0.39293300  | 5.32245000  |
| H  | 2.37346100  | -1.55010800 | 4.46306900  |
| H  | 1.57793700  | -0.44291900 | 2.43692200  |
| H  | 2.42729800  | 0.85217300  | 4.92374000  |
| Br | 4.99768200  | 3.04019900  | -0.80449100 |
| O  | 4.37010700  | -1.59650500 | 3.88840700  |
| C  | 4.34579700  | -2.89413800 | 3.34267900  |
| H  | 5.37909500  | -3.20144600 | 3.18738900  |
| H  | 3.84489000  | -3.60019700 | 4.01965200  |
| N  | 2.87822200  | -1.82064000 | 1.65451400  |
| C  | 2.28763000  | -2.14840900 | 0.50836200  |
| C  | 3.62668900  | -2.89967300 | 2.02933100  |
| N  | 3.50248900  | -3.87813400 | 1.17447800  |
| N  | 2.66150700  | -3.38239300 | 0.22284600  |
| C  | 2.05820400  | -4.20051900 | -0.79944500 |
| C  | 2.56906700  | -4.19267300 | -2.09698000 |
| C  | 0.92668700  | -4.94255800 | -0.42313600 |
| C  | 1.83291600  | -4.87827900 | -3.06948400 |
| C  | 0.23059500  | -5.59940700 | -1.43280900 |
| C  | 0.65492000  | -5.55466000 | -2.76546800 |
| H  | 2.19868400  | -4.87143000 | -4.09353500 |
| H  | -0.66399300 | -6.16127100 | -1.17639100 |
| C  | -0.15263300 | -6.22518700 | -3.84543800 |
| H  | -0.59670200 | -7.15646100 | -3.48508500 |
| H  | -0.97665800 | -5.57742400 | -4.16354500 |
| H  | 0.46214700  | -6.44477000 | -4.72070500 |
| C  | 0.53012000  | -5.10944600 | 1.02207900  |
| H  | 1.15985900  | -5.87565700 | 1.48591500  |
| H  | 0.64141000  | -4.19470400 | 1.60967600  |
| H  | -0.50894200 | -5.43971500 | 1.09218900  |
| C  | 3.87792900  | -3.54622200 | -2.46218200 |
| H  | 4.23201300  | -2.83326900 | -1.71763200 |
| H  | 4.64148200  | -4.32382900 | -2.56942500 |
| H  | 3.79095100  | -3.04067700 | -3.42741700 |

|   |             |             |             |
|---|-------------|-------------|-------------|
| H | 1.60996700  | -1.53730800 | -0.07169600 |
| B | 5.98429400  | -1.24424200 | 0.09901300  |
| F | 4.64815400  | -1.33504900 | -0.38325600 |
| F | 6.77697800  | -2.12075100 | -0.63567900 |
| F | 5.97758000  | -1.60785400 | 1.45375700  |
| F | 6.42684400  | 0.06908800  | -0.05003400 |
| N | 2.73947800  | 1.11149900  | -2.73943200 |
| C | 1.69447100  | 1.97948000  | -3.27526200 |
| C | 2.14619500  | 3.42687700  | -3.45325800 |
| H | 0.85496300  | 1.93788300  | -2.57008600 |
| H | 1.30166300  | 1.61137000  | -4.24151000 |
| H | 1.27655200  | 4.08323600  | -3.55553600 |
| H | 2.73732100  | 3.75467700  | -2.59333100 |
| H | 2.75726100  | 3.55537100  | -4.35017400 |
| C | 3.93983700  | 1.13316800  | -3.57518500 |
| C | 5.03972100  | 0.20388100  | -3.08405000 |
| H | 4.32644000  | 2.15734200  | -3.55952700 |
| H | 3.69487900  | 0.90708800  | -4.63099700 |
| H | 5.94526500  | 0.37411900  | -3.67354100 |
| H | 5.26750300  | 0.39097400  | -2.03246800 |
| H | 4.76978900  | -0.85114600 | -3.18646700 |
| C | 2.22335800  | -0.23647500 | -2.48617300 |
| C | 1.79841800  | -1.04884200 | -3.71246100 |
| H | 1.35090200  | -0.11627500 | -1.82968700 |
| H | 2.98800500  | -0.78502700 | -1.92271900 |
| H | 1.43853000  | -2.03324200 | -3.39555900 |
| H | 0.98178400  | -0.56450100 | -4.25481900 |
| H | 2.63354800  | -1.19956900 | -4.40539700 |
| C | -1.69242400 | -1.60967200 | -1.14485400 |
| C | -0.90861400 | -1.19837100 | -0.06009400 |
| H | -1.93648800 | -2.67035900 | -1.10749400 |
| C | -0.74466400 | -2.12682200 | 1.03201400  |
| H | -1.23074700 | -3.10401800 | 0.86335600  |
| O | -0.06814900 | -1.93031100 | 2.04462300  |
| C | -1.63793600 | -1.06861700 | -2.52087200 |
| C | -1.69235400 | -1.98013500 | -3.58517500 |
| C | -1.54159600 | 0.29654000  | -2.81671600 |
| C | -1.68418800 | -1.53778700 | -4.90470500 |
| H | -1.73561500 | -3.04356800 | -3.36813400 |
| C | -1.54577900 | 0.74094800  | -4.13455100 |
| H | -1.45814000 | 1.01826500  | -2.01516500 |
| C | -1.62556500 | -0.17356700 | -5.18424100 |
| H | -1.72506200 | -2.26055200 | -5.71353200 |
| H | -1.48162000 | 1.80801300  | -4.32657100 |

|    |             |             |             |
|----|-------------|-------------|-------------|
| H  | -1.63179900 | 0.17443000  | -6.21207900 |
| C  | -0.40932900 | 0.12274800  | 0.09603900  |
| C  | -0.00249800 | 1.25761400  | 0.26592800  |
| C  | 0.35292700  | 2.63008900  | 0.46291500  |
| C  | -0.51304900 | 3.47455000  | 1.17797700  |
| C  | 1.52075600  | 3.14721000  | -0.11457800 |
| C  | -0.22633800 | 4.82422700  | 1.30314500  |
| H  | -1.42217200 | 3.06963000  | 1.61008100  |
| C  | 1.82719700  | 4.49355300  | 0.02550000  |
| H  | 2.17525600  | 2.49506100  | -0.68848100 |
| C  | 0.94045300  | 5.30592300  | 0.72051400  |
| H  | -0.88493600 | 5.49931100  | 1.83401200  |
| H  | 2.74264100  | 4.90287200  | -0.38579500 |
| C  | -5.75061100 | 3.25184200  | -1.47421800 |
| C  | -4.83108600 | 2.39474000  | -0.86247200 |
| C  | -3.46537700 | 2.52692900  | -1.05632200 |
| C  | -3.04421900 | 3.52693800  | -1.93584600 |
| C  | -3.94307600 | 4.35740800  | -2.59610500 |
| C  | -5.31159600 | 4.22610800  | -2.35682700 |
| C  | -7.14551900 | 2.97869800  | -0.95822000 |
| C  | -6.85403600 | 2.25992700  | 0.36142100  |
| C  | -5.59779700 | 1.42763200  | 0.01755000  |
| H  | -2.74623000 | 1.89746200  | -0.53551300 |
| H  | -3.57292500 | 5.12068300  | -3.27057300 |
| H  | -6.01260700 | 4.90054700  | -2.83757000 |
| H  | -7.73083100 | 3.88409300  | -0.78757200 |
| H  | -7.67803300 | 1.64727300  | 0.74617800  |
| H  | -5.88008600 | 0.52024700  | -0.52538000 |
| H  | -7.70783700 | 2.32154700  | -1.63008700 |
| Br | -1.18889800 | 3.78299200  | -2.23151900 |
| O  | -6.49122700 | 3.26947400  | 1.29133300  |
| C  | -6.12145000 | 2.77610700  | 2.55463400  |
| H  | -5.69435000 | 3.60198800  | 3.12479300  |
| H  | -6.99098500 | 2.38477200  | 3.10067400  |
| N  | -4.91759700 | 1.01067800  | 1.24531000  |
| C  | -4.11798900 | -0.05797900 | 1.49928200  |
| C  | -5.12298000 | 1.66199600  | 2.42955600  |
| N  | -4.48039600 | 1.07718900  | 3.39724300  |
| N  | -3.86816600 | 0.01225000  | 2.81487100  |
| C  | -3.10764000 | -0.85035400 | 3.69666000  |
| C  | -3.75321800 | -1.94992300 | 4.27121300  |
| C  | -1.82227600 | -0.44751200 | 4.04438100  |
| C  | -3.01934300 | -2.70811300 | 5.17696500  |
| C  | -1.13249100 | -1.23816700 | 4.96387900  |

|   |             |             |             |
|---|-------------|-------------|-------------|
| C | -1.70426700 | -2.37685100 | 5.52283900  |
| H | -3.48841300 | -3.57659700 | 5.63265500  |
| H | -0.12200400 | -0.94915700 | 5.24212300  |
| C | -0.92439100 | -3.24663400 | 6.47369100  |
| H | -0.54343500 | -4.13231700 | 5.95533900  |
| H | -0.06917300 | -2.71035300 | 6.89028700  |
| H | -1.55206700 | -3.59382600 | 7.29806700  |
| C | -1.22160400 | 0.80440100  | 3.47358700  |
| H | -1.30917400 | 0.81470600  | 2.38536600  |
| H | -1.72608700 | 1.69261000  | 3.86976500  |
| H | -0.16023200 | 0.87402700  | 3.72185200  |
| C | -5.17970800 | -2.28400600 | 3.93345100  |
| H | -5.82736800 | -1.40931000 | 4.05267800  |
| H | -5.24904900 | -2.62004100 | 2.89593100  |
| H | -5.55206900 | -3.07441600 | 4.58671900  |
| C | -4.51646900 | -2.18281500 | -1.71061000 |
| C | -3.85786000 | -1.17216800 | -0.76942600 |
| H | -4.43840900 | -1.74672900 | -2.71186100 |
| C | -3.83474800 | -1.28233000 | 0.63335700  |
| O | -3.54830100 | -2.28463000 | 1.31140900  |
| C | -4.09025100 | -3.64093300 | -1.83470400 |
| C | -4.08410700 | -4.20707900 | -3.11639500 |
| C | -3.79142300 | -4.47176000 | -0.74906400 |
| C | -3.77702400 | -5.55040300 | -3.31585600 |
| H | -4.31206100 | -3.57847100 | -3.97410300 |
| C | -3.47817600 | -5.81633500 | -0.94676800 |
| H | -3.78939800 | -4.05524200 | 0.25118100  |
| C | -3.46730500 | -6.36324600 | -2.22741000 |
| H | -3.77510200 | -5.95971300 | -4.32160300 |
| H | -3.24367000 | -6.43986600 | -0.08852500 |
| H | -3.22260800 | -7.41042600 | -2.37654900 |
| H | -3.95254200 | -0.15894200 | -1.15275600 |
| H | -5.59284200 | -2.18870200 | -1.48297800 |
| N | 1.25067700  | 6.73278100  | 0.85321000  |
| O | 0.45637400  | 7.43617100  | 1.45490900  |
| O | 2.28483600  | 7.14106800  | 0.35419100  |

TS4CNO-SS

|   |             |             |             |
|---|-------------|-------------|-------------|
| C | -6.63424800 | -1.35999300 | 1.89365400  |
| C | -5.55849000 | -0.76150700 | 1.22636800  |
| C | -5.10419000 | -1.24510000 | 0.00689200  |
| C | -5.78993700 | -2.33354500 | -0.52858100 |
| C | -6.88608600 | -2.91838700 | 0.09573100  |
| C | -7.31557900 | -2.42596200 | 1.32619600  |

|    |             |             |             |
|----|-------------|-------------|-------------|
| C  | -6.86743100 | -0.70730800 | 3.23242300  |
| C  | -6.20791600 | 0.65516100  | 3.04086300  |
| C  | -5.00536100 | 0.34407900  | 2.11172500  |
| H  | -4.26028100 | -0.82185600 | -0.53116200 |
| H  | -7.38329100 | -3.76330700 | -0.36670800 |
| H  | -8.15427800 | -2.88750900 | 1.83841100  |
| H  | -7.92069000 | -0.59402700 | 3.49584400  |
| H  | -5.90015700 | 1.15607400  | 3.96741300  |
| H  | -4.15321300 | -0.01916000 | 2.69699800  |
| H  | -6.36910400 | -1.27351200 | 4.02860200  |
| Br | -5.15335200 | -3.12938500 | -2.12487300 |
| O  | -7.15514600 | 1.43741900  | 2.33415800  |
| C  | -6.71932100 | 2.74069800  | 2.03742300  |
| H  | -7.44079900 | 3.18627400  | 1.35568600  |
| H  | -6.63638700 | 3.34793600  | 2.95019100  |
| N  | -4.58175700 | 1.59060200  | 1.46321300  |
| C  | -3.41678800 | 1.90875400  | 0.88240200  |
| C  | -5.38035400 | 2.69844100  | 1.37316600  |
| N  | -4.75791800 | 3.67620500  | 0.78267200  |
| N  | -3.53449500 | 3.16407100  | 0.47914600  |
| C  | -2.54039600 | 4.04343100  | -0.08490800 |
| C  | -2.67224700 | 4.42541500  | -1.42198300 |
| C  | -1.57338900 | 4.56843900  | 0.77679500  |
| C  | -1.76041900 | 5.36610400  | -1.90219600 |
| C  | -0.70101900 | 5.51826200  | 0.24905900  |
| C  | -0.78333400 | 5.93292900  | -1.08253300 |
| H  | -1.84103300 | 5.68623500  | -2.93809100 |
| H  | 0.03882200  | 5.96406500  | 0.90880800  |
| C  | 0.14773400  | 6.98719700  | -1.62671400 |
| H  | 0.56538000  | 7.59933200  | -0.82309400 |
| H  | 0.98328400  | 6.53589000  | -2.17334000 |
| H  | -0.37551500 | 7.64725700  | -2.32235200 |
| C  | -1.48845400 | 4.14751000  | 2.21828900  |
| H  | -2.47080800 | 4.17411100  | 2.70030500  |
| H  | -1.09407200 | 3.12960300  | 2.28466000  |
| H  | -0.81941500 | 4.81163000  | 2.76786800  |
| C  | -3.77227200 | 3.89132200  | -2.29617500 |
| H  | -4.04085000 | 2.86312900  | -2.05177200 |
| H  | -4.68517300 | 4.48170500  | -2.16687500 |
| H  | -3.48115300 | 3.94807700  | -3.34746200 |
| H  | -2.51361200 | 1.30776300  | 0.80162800  |
| B  | -6.54724000 | 1.57597500  | -1.65698500 |
| F  | -5.24703300 | 1.37435700  | -1.12488100 |
| F  | -6.44156400 | 2.34609700  | -2.81633200 |

|   |             |             |             |
|---|-------------|-------------|-------------|
| F | -7.30866400 | 2.25745500  | -0.69464600 |
| F | -7.12136500 | 0.33955500  | -1.93628500 |
| N | -2.52685800 | -0.94558700 | -2.61992900 |
| C | -1.31609900 | -1.75325000 | -2.70849600 |
| C | -1.56262100 | -3.19410400 | -3.14237300 |
| H | -0.86722500 | -1.76472600 | -1.71155300 |
| H | -0.56415900 | -1.30282600 | -3.38713500 |
| H | -0.66233900 | -3.78799300 | -2.95809000 |
| H | -2.39390500 | -3.61819200 | -2.57255400 |
| H | -1.80563200 | -3.27597200 | -4.20545800 |
| C | -3.19170100 | -0.81514900 | -3.91237800 |
| C | -4.45060600 | 0.03928700  | -3.86689500 |
| H | -3.47552600 | -1.82336600 | -4.23410200 |
| H | -2.49756400 | -0.42503300 | -4.68379900 |
| H | -4.95914700 | -0.01215100 | -4.83426700 |
| H | -5.14011500 | -0.31627900 | -3.09680300 |
| H | -4.24375100 | 1.09251800  | -3.65950300 |
| C | -2.26945100 | 0.32987700  | -1.95212800 |
| C | -1.34564800 | 1.31708800  | -2.67348800 |
| H | -1.83284200 | 0.08739000  | -0.97637800 |
| H | -3.23504500 | 0.80822500  | -1.75996700 |
| H | -1.22448100 | 2.21767900  | -2.06240700 |
| H | -0.34935300 | 0.89092200  | -2.83731300 |
| H | -1.75616600 | 1.61713100  | -3.64377100 |
| C | 1.74056500  | -0.87191200 | -0.79016000 |
| C | 0.69152600  | -0.34924200 | -0.01819100 |
| H | 2.18142300  | -0.13929900 | -1.46641500 |
| C | 0.47300100  | 1.07957800  | 0.02261300  |
| H | 1.20378400  | 1.68150200  | -0.54820200 |
| O | -0.47388900 | 1.63033800  | 0.58487100  |
| C | 1.78672500  | -2.24797500 | -1.34451600 |
| C | 2.15829900  | -2.40852800 | -2.68757000 |
| C | 1.47385200  | -3.39155100 | -0.59667900 |
| C | 2.24227300  | -3.67308800 | -3.26413300 |
| H | 2.36518200  | -1.52595700 | -3.29079100 |
| C | 1.55840300  | -4.65513500 | -1.17383200 |
| H | 1.17129400  | -3.29069900 | 0.43923100  |
| C | 1.95036800  | -4.80326400 | -2.50397500 |
| H | 2.52820600  | -3.77235200 | -4.30641200 |
| H | 1.32086100  | -5.53037900 | -0.57804200 |
| H | 2.01791300  | -5.79155700 | -2.94618700 |
| C | -0.26247100 | -1.15636000 | 0.65325800  |
| C | -1.15104700 | -1.80654400 | 1.16874600  |
| C | -2.25421100 | -2.58203800 | 1.62976700  |



|    |             |             |             |
|----|-------------|-------------|-------------|
| C  | -2.80166500 | -2.36688000 | 2.90719800  |
| C  | -2.83420100 | -3.53123500 | 0.77125500  |
| C  | -3.94452500 | -3.04411900 | 3.29824000  |
| H  | -2.32844100 | -1.65681500 | 3.57664300  |
| C  | -3.96834900 | -4.22598300 | 1.16153800  |
| H  | -2.40515100 | -3.68752300 | -0.21351200 |
| C  | -4.51551000 | -3.94946400 | 2.40889700  |
| H  | -4.39720800 | -2.88291200 | 4.26890500  |
| H  | -4.46100400 | -4.92031300 | 0.49140800  |
| C  | 6.99297100  | -2.61791400 | -2.22848000 |
| C  | 6.40866100  | -1.72257100 | -1.32992600 |
| C  | 6.82757700  | -1.62791600 | -0.01067900 |
| C  | 7.84832300  | -2.48735000 | 0.39198800  |
| C  | 8.43024700  | -3.40532500 | -0.47705300 |
| C  | 8.00178200  | -3.46990400 | -1.80273000 |
| C  | 6.38530400  | -2.45848900 | -3.60340300 |
| C  | 5.76794400  | -1.06018500 | -3.52893200 |
| C  | 5.31439800  | -0.96534300 | -2.05404000 |
| H  | 6.38934200  | -0.92311100 | 0.69118000  |
| H  | 9.22233500  | -4.05402100 | -0.12180800 |
| H  | 8.46834200  | -4.16875100 | -2.48921500 |
| H  | 7.11129200  | -2.51858800 | -4.41638200 |
| H  | 4.94142700  | -0.89046500 | -4.23108600 |
| H  | 4.34587200  | -1.46180200 | -1.94526300 |
| H  | 5.60182000  | -3.20403000 | -3.77978800 |
| Br | 8.47385800  | -2.39862300 | 2.17847100  |
| O  | 6.81639600  | -0.13362900 | -3.75807900 |
| C  | 6.39098500  | 1.20556900  | -3.68964000 |
| H  | 7.26984400  | 1.84536100  | -3.77354700 |
| H  | 5.69821700  | 1.44600200  | -4.50825200 |
| N  | 5.15065100  | 0.43746500  | -1.66036500 |
| C  | 4.49908300  | 0.99347700  | -0.60871700 |
| C  | 5.69473800  | 1.46306400  | -2.38651200 |
| N  | 5.43349900  | 2.61299700  | -1.83829200 |
| N  | 4.69431300  | 2.30724500  | -0.73900000 |
| C  | 4.23486900  | 3.39308200  | 0.09014200  |
| C  | 3.25908700  | 4.23150400  | -0.43970400 |
| C  | 4.81643600  | 3.57373900  | 1.34921300  |
| C  | 2.87593600  | 5.32386800  | 0.33951200  |
| C  | 4.38834800  | 4.67226000  | 2.08702200  |
| C  | 3.42192900  | 5.55799200  | 1.59822400  |
| H  | 2.12728800  | 6.00323000  | -0.05651700 |
| H  | 4.81716700  | 4.84030700  | 3.07174800  |
| C  | 2.95501300  | 6.72033600  | 2.43503300  |

|   |             |             |             |
|---|-------------|-------------|-------------|
| H | 2.27234500  | 6.37736600  | 3.21930400  |
| H | 3.79508100  | 7.21718800  | 2.92649200  |
| H | 2.42439000  | 7.45730800  | 1.82737800  |
| C | 5.81681500  | 2.59581600  | 1.90486000  |
| H | 5.30269400  | 1.69277400  | 2.25745400  |
| H | 6.55688300  | 2.29835500  | 1.15542800  |
| H | 6.34757300  | 3.03312300  | 2.75191500  |
| C | 2.61636800  | 3.99087700  | -1.78158700 |
| H | 2.66626900  | 2.94100100  | -2.08282900 |
| H | 1.56100700  | 4.27557900  | -1.74027300 |
| H | 3.10237800  | 4.58171200  | -2.56426100 |
| C | 2.94441900  | -1.53701100 | 1.85909400  |
| C | 3.48629000  | -1.00461200 | 0.55246300  |
| H | 2.93721500  | -2.63066400 | 1.82744500  |
| C | 3.64509300  | 0.38986600  | 0.48266200  |
| O | 3.00439300  | 1.19962900  | 1.17341200  |
| C | 3.78195800  | -1.05729200 | 3.03014900  |
| C | 5.06272100  | -1.57218800 | 3.25448400  |
| C | 3.31039000  | -0.04426700 | 3.86858400  |
| C | 5.85157500  | -1.08730700 | 4.29538600  |
| H | 5.44981400  | -2.35837900 | 2.60774800  |
| C | 4.09539000  | 0.44027400  | 4.91253800  |
| H | 2.32797000  | 0.37737500  | 3.68017000  |
| C | 5.36936000  | -0.07980100 | 5.12888700  |
| H | 6.84403200  | -1.49681400 | 4.45199200  |
| H | 3.71338000  | 1.22983800  | 5.55235500  |
| H | 5.98399800  | 0.29756800  | 5.93996200  |
| H | 4.16050700  | -1.65786600 | 0.01455800  |
| H | 1.91345200  | -1.19336800 | 1.99973400  |
| N | -5.77100700 | -4.59464900 | 2.78524700  |
| O | -6.33140400 | -4.20385100 | 3.79765700  |
| O | -6.20742500 | -5.47032700 | 2.05849700  |

TS4CNO-RR

|   |             |             |             |
|---|-------------|-------------|-------------|
| C | -0.28243800 | -4.54642400 | 0.82768800  |
| C | -0.87104600 | -3.28828700 | 0.69735300  |
| C | -0.79437500 | -2.56881700 | -0.49018000 |
| C | -0.09460400 | -3.15336500 | -1.54109900 |
| C | 0.47929500  | -4.42009800 | -1.44218900 |
| C | 0.38772500  | -5.12307000 | -0.24464500 |
| C | -0.46860700 | -5.10048000 | 2.21817100  |
| C | -1.52804600 | -4.18538100 | 2.84303100  |
| C | -1.42465400 | -2.86079900 | 2.03789200  |
| H | -1.25831900 | -1.59686600 | -0.63879800 |

|    |             |             |             |
|----|-------------|-------------|-------------|
| H  | 0.99260600  | -4.84738200 | -2.29733900 |
| H  | 0.83117900  | -6.10976700 | -0.15759200 |
| H  | -0.82571800 | -6.13307500 | 2.22861400  |
| H  | -1.37503600 | -4.01123000 | 3.91665700  |
| H  | -0.73205700 | -2.15738800 | 2.51122000  |
| H  | 0.46609500  | -5.06891600 | 2.78834100  |
| Br | 0.12316400  | -2.17775000 | -3.14269600 |
| O  | -2.78484800 | -4.80087800 | 2.63610200  |
| C  | -3.84310700 | -4.06107200 | 3.20041800  |
| H  | -4.77185800 | -4.58086100 | 2.98044300  |
| H  | -3.71155700 | -3.95196000 | 4.28654700  |
| N  | -2.72813700 | -2.19284600 | 2.01588800  |
| C  | -3.05697900 | -1.00768400 | 1.49555400  |
| C  | -3.87318300 | -2.71332900 | 2.55508500  |
| N  | -4.86807000 | -1.88375400 | 2.43220400  |
| N  | -4.33853500 | -0.82550700 | 1.76058300  |
| C  | -5.12143700 | 0.34976600  | 1.50398200  |
| C  | -6.30333400 | 0.20655700  | 0.76721000  |
| C  | -4.69466100 | 1.56321700  | 2.05427100  |
| C  | -7.07189300 | 1.35386700  | 0.58115900  |
| C  | -5.51407800 | 2.67291300  | 1.84503700  |
| C  | -6.69642600 | 2.59007400  | 1.11225400  |
| H  | -7.98908800 | 1.27693900  | 0.00190600  |
| H  | -5.22063400 | 3.62453800  | 2.27845200  |
| C  | -7.55766300 | 3.80612200  | 0.89336600  |
| H  | -8.58374800 | 3.62382100  | 1.22426500  |
| H  | -7.17145300 | 4.66881100  | 1.44276300  |
| H  | -7.60161900 | 4.06670300  | -0.16938200 |
| C  | -3.42673200 | 1.68960000  | 2.86133800  |
| H  | -3.34320400 | 0.88902900  | 3.60343300  |
| H  | -2.52736600 | 1.64693000  | 2.23517100  |
| H  | -3.41973300 | 2.64453700  | 3.38976200  |
| C  | -6.72062700 | -1.11649200 | 0.18352700  |
| H  | -5.87447300 | -1.66630700 | -0.23566900 |
| H  | -7.16223400 | -1.75912700 | 0.95113500  |
| H  | -7.46267700 | -0.96005800 | -0.60188300 |
| H  | -2.38956400 | -0.30442800 | 1.01473700  |
| B  | -4.73100200 | -4.14617400 | -0.44144200 |
| F  | -3.99024200 | -2.95647800 | -0.23051400 |
| F  | -5.84174700 | -3.84145000 | -1.23786200 |
| F  | -5.16904700 | -4.62582100 | 0.80217300  |
| F  | -3.92197100 | -5.08753800 | -1.06621400 |
| N  | -2.76270600 | -0.49710200 | -2.94901900 |
| C  | -2.01451300 | 0.62782700  | -3.49156500 |

|   |             |             |             |
|---|-------------|-------------|-------------|
| C | -2.64886300 | 1.46946400  | -4.60903400 |
| H | -1.06364900 | 0.22964800  | -3.87222500 |
| H | -1.74551100 | 1.27634600  | -2.65057300 |
| H | -1.89659100 | 2.15492900  | -5.01140600 |
| H | -2.99894800 | 0.84072200  | -5.43307600 |
| H | -3.49327300 | 2.07297800  | -4.26535800 |
| C | -3.15948700 | -1.46370000 | -3.96359100 |
| C | -3.52088600 | -2.81764900 | -3.37089100 |
| H | -2.30111300 | -1.58416800 | -4.63615700 |
| H | -3.99425700 | -1.09877200 | -4.58893700 |
| H | -3.70906100 | -3.53793300 | -4.17295600 |
| H | -2.70090400 | -3.19050800 | -2.75196100 |
| H | -4.41288600 | -2.77763400 | -2.74186800 |
| C | -3.80310400 | -0.16462500 | -1.98066100 |
| C | -5.14728200 | 0.31616300  | -2.54577200 |
| H | -3.38406100 | 0.60083400  | -1.31175800 |
| H | -3.98265100 | -1.05158700 | -1.36100800 |
| H | -5.78390800 | 0.68524900  | -1.73722500 |
| H | -5.02689800 | 1.12524500  | -3.27087200 |
| H | -5.67798600 | -0.50164400 | -3.04383300 |
| C | 1.46190900  | 0.70267400  | -1.08987100 |
| C | 0.40986600  | 0.85922600  | -0.16243100 |
| H | 1.98834100  | -0.24593200 | -0.98022700 |
| C | 0.41640900  | 0.01983900  | 1.00871700  |
| H | 1.28300400  | -0.66866200 | 1.06780500  |
| O | -0.45988200 | -0.02757500 | 1.87688700  |
| C | 1.46595900  | 1.17040400  | -2.49777400 |
| C | 2.21369100  | 0.43667600  | -3.43070500 |
| C | 0.76779900  | 2.29961800  | -2.94821900 |
| C | 2.24741000  | 0.80210700  | -4.77138000 |
| H | 2.74535700  | -0.45248800 | -3.10365300 |
| C | 0.81399000  | 2.67415300  | -4.28825100 |
| H | 0.18454600  | 2.88959400  | -2.25131500 |
| C | 1.54526000  | 1.92471100  | -5.20672900 |
| H | 2.82000300  | 0.20770700  | -5.47599800 |
| H | 0.27038600  | 3.55531700  | -4.61444500 |
| H | 1.57082900  | 2.21464900  | -6.25208600 |
| C | -0.64444700 | 1.80872800  | -0.22981600 |
| C | -1.59181000 | 2.57380100  | -0.21559300 |
| C | -2.67913000 | 3.50259600  | -0.24875900 |
| C | -3.63567200 | 3.43623800  | -1.27735500 |
| C | -2.79086400 | 4.49865500  | 0.73693500  |
| C | -4.68591000 | 4.33913100  | -1.32240300 |
| H | -3.54586700 | 2.67038000  | -2.03955700 |

|    |             |             |             |
|----|-------------|-------------|-------------|
| C  | -3.83379600 | 5.41150700  | 0.69716000  |
| H  | -2.04729600 | 4.55146300  | 1.52428800  |
| C  | -4.76435800 | 5.31139600  | -0.33142800 |
| H  | -5.43327300 | 4.29942100  | -2.10534600 |
| H  | -3.93591200 | 6.18920200  | 1.44373000  |
| C  | 7.14006100  | -0.23464400 | -1.76974400 |
| C  | 6.00098400  | -0.01585200 | -0.99897600 |
| C  | 4.89041700  | -0.83142600 | -1.08327500 |
| C  | 4.92162600  | -1.87857700 | -1.99469900 |
| C  | 6.02339100  | -2.09717800 | -2.81554700 |
| C  | 7.14552000  | -1.26932800 | -2.69802200 |
| C  | 8.23131900  | 0.72132000  | -1.33578600 |
| C  | 7.79279100  | 1.09522700  | 0.09009400  |
| C  | 6.24569400  | 1.10536500  | -0.01704900 |
| H  | 4.02259100  | -0.69283300 | -0.44820000 |
| H  | 6.02092100  | -2.92090800 | -3.51998200 |
| H  | 8.02070000  | -1.46436900 | -3.30915000 |
| H  | 9.22744900  | 0.27519400  | -1.32265300 |
| H  | 8.19437200  | 2.04856100  | 0.45244500  |
| H  | 5.88664600  | 2.08077900  | -0.36226300 |
| H  | 8.25977900  | 1.61474000  | -1.96834100 |
| Br | 3.39122000  | -2.99070000 | -2.04041300 |
| O  | 8.21389700  | 0.02599700  | 0.92283600  |
| C  | 7.78174500  | 0.14939100  | 2.25879200  |
| H  | 8.13206000  | -0.72223300 | 2.81105400  |
| H  | 8.18643600  | 1.05733200  | 2.72691400  |
| N  | 5.60562800  | 0.80158500  | 1.26556700  |
| C  | 4.28563100  | 0.75141400  | 1.56949800  |
| C  | 6.28548400  | 0.20494000  | 2.29121200  |
| N  | 5.46679600  | -0.21990500 | 3.20931500  |
| N  | 4.23325900  | 0.12401400  | 2.74808900  |
| C  | 3.06657400  | -0.34441300 | 3.45310700  |
| C  | 2.52694400  | 0.46252100  | 4.45525900  |
| C  | 2.58151800  | -1.61277900 | 3.12771400  |
| C  | 1.40139900  | -0.01919000 | 5.11672300  |
| C  | 1.46943600  | -2.05617700 | 3.84329500  |
| C  | 0.85183400  | -1.26590800 | 4.81287000  |
| H  | 0.94354300  | 0.59364700  | 5.88825700  |
| H  | 1.08413900  | -3.05276000 | 3.63947300  |
| C  | -0.39780300 | -1.74197300 | 5.50431700  |
| H  | -0.55623000 | -1.21642900 | 6.44788200  |
| H  | -1.27520700 | -1.55316300 | 4.87276800  |
| H  | -0.35493500 | -2.81469400 | 5.71041900  |
| C  | 3.21071400  | -2.47505600 | 2.06042700  |

|   |             |             |             |
|---|-------------|-------------|-------------|
| H | 2.83945100  | -2.23154600 | 1.05595400  |
| H | 4.29979400  | -2.37860200 | 2.04579500  |
| H | 2.96756300  | -3.52487800 | 2.23612900  |
| C | 3.14183100  | 1.79324200  | 4.78561100  |
| H | 4.19512200  | 1.68004900  | 5.06017500  |
| H | 3.08472700  | 2.45132400  | 3.91378700  |
| H | 2.61741600  | 2.26234500  | 5.61910000  |
| C | 2.60662000  | 3.32756700  | -0.64195700 |
| C | 3.12352800  | 1.92112300  | -0.39678200 |
| H | 1.59812800  | 3.42306700  | -0.22496100 |
| C | 3.13821800  | 1.53860300  | 0.96274600  |
| O | 2.24761100  | 1.84917800  | 1.77192900  |
| C | 3.53797400  | 4.32758200  | 0.00870300  |
| C | 4.71338300  | 4.72115700  | -0.64022800 |
| C | 3.28387300  | 4.81668200  | 1.29361700  |
| C | 5.61957300  | 5.57705500  | -0.01877800 |
| H | 4.91341600  | 4.35401200  | -1.64509200 |
| C | 4.18836300  | 5.67457900  | 1.91681700  |
| H | 2.37573800  | 4.50896400  | 1.80362200  |
| C | 5.35948300  | 6.05522000  | 1.26478500  |
| H | 6.52412000  | 5.87724800  | -0.53878700 |
| H | 3.97608200  | 6.04857200  | 2.91373500  |
| H | 6.06183300  | 6.72516300  | 1.75009000  |
| H | 3.92646000  | 1.59553600  | -1.05061100 |
| H | 2.55428900  | 3.51795600  | -1.71565600 |
| N | -5.87216100 | 6.26689300  | -0.37123200 |
| O | -5.98837600 | 7.04643400  | 0.56012300  |
| O | -6.62825200 | 6.22768800  | -1.32762400 |

TS4CNO-SR

|   |            |             |             |
|---|------------|-------------|-------------|
| C | 0.81360200 | -4.75416000 | 0.48397900  |
| C | 1.37280200 | -3.49795100 | 0.24134100  |
| C | 1.72100700 | -2.63309500 | 1.27160000  |
| C | 1.49675500 | -3.08430700 | 2.56975800  |
| C | 0.91090100 | -4.31838500 | 2.83879600  |
| C | 0.56284400 | -5.16340200 | 1.78625600  |
| C | 0.59230200 | -5.50233900 | -0.81110200 |
| C | 1.49802100 | -4.76092300 | -1.80113200 |
| C | 1.49712000 | -3.31475700 | -1.25513300 |
| H | 2.21494500 | -1.67738400 | 1.11511000  |
| H | 0.75826600 | -4.62648800 | 3.86667600  |
| H | 0.13049000 | -6.13733100 | 1.99170500  |
| H | 0.86570600 | -6.55834500 | -0.75947300 |
| H | 1.14806400 | -4.80188700 | -2.84158600 |

|    |             |             |             |
|----|-------------|-------------|-------------|
| H  | 0.65006000  | -2.77120200 | -1.67917400 |
| H  | -0.45374700 | -5.43390200 | -1.13354200 |
| Br | 2.07152700  | -2.01768200 | 4.02541800  |
| O  | 2.79312100  | -5.31917800 | -1.70088800 |
| C  | 3.73674900  | -4.70016900 | -2.54567700 |
| H  | 4.71147000  | -5.12739900 | -2.32044900 |
| H  | 3.48653300  | -4.86591300 | -3.60325700 |
| N  | 2.70033200  | -2.61597000 | -1.69373700 |
| C  | 2.99443900  | -1.31856200 | -1.60446300 |
| C  | 3.77495100  | -3.22574800 | -2.27670800 |
| N  | 4.68920600  | -2.35148800 | -2.59196900 |
| N  | 4.18392600  | -1.16373600 | -2.15855900 |
| C  | 4.87469600  | 0.07764000  | -2.37248400 |
| C  | 6.18330800  | 0.21227600  | -1.89305400 |
| C  | 4.20432000  | 1.08903500  | -3.07358500 |
| C  | 6.81846400  | 1.43205500  | -2.12697900 |
| C  | 4.89265600  | 2.28532600  | -3.27295100 |
| C  | 6.18969700  | 2.48169100  | -2.79691300 |
| H  | 7.82861100  | 1.56944300  | -1.75005500 |
| H  | 4.40365700  | 3.08114000  | -3.83119800 |
| C  | 6.87074900  | 3.81452200  | -2.95998800 |
| H  | 7.95677300  | 3.70549300  | -2.98826700 |
| H  | 6.54653400  | 4.31646200  | -3.87496200 |
| H  | 6.62496800  | 4.47263500  | -2.11811200 |
| C  | 2.80642600  | 0.91762200  | -3.61786600 |
| H  | 2.67562700  | -0.05668100 | -4.09809100 |
| H  | 2.03766700  | 0.99609100  | -2.83870400 |
| H  | 2.60479700  | 1.69004200  | -4.36297300 |
| C  | 6.88200800  | -0.88491000 | -1.13703100 |
| H  | 6.20780800  | -1.40362500 | -0.45235400 |
| H  | 7.28147400  | -1.63516500 | -1.82605000 |
| H  | 7.71505900  | -0.46762300 | -0.56777400 |
| H  | 2.37236900  | -0.54038000 | -1.18447600 |
| B  | 5.08161400  | -3.50200800 | 0.88504800  |
| F  | 4.46275400  | -2.31926300 | 0.39889200  |
| F  | 6.43181000  | -3.23511600 | 1.11719400  |
| F  | 4.95547300  | -4.49496300 | -0.09719000 |
| F  | 4.44742500  | -3.90223000 | 2.05843500  |
| N  | 3.58327500  | 0.57953800  | 2.40681700  |
| C  | 2.56931800  | 1.46149700  | 2.97586800  |
| C  | 3.04232300  | 2.71762200  | 3.72126700  |
| H  | 1.96863300  | 0.86250800  | 3.67644400  |
| H  | 1.89216200  | 1.74996800  | 2.16594200  |
| H  | 2.16741200  | 3.27495600  | 4.07360300  |

|   |             |             |             |
|---|-------------|-------------|-------------|
| H | 3.64029600  | 2.45971200  | 4.60001300  |
| H | 3.63884500  | 3.38318500  | 3.09152800  |
| C | 4.65886500  | 0.28995600  | 3.34436800  |
| C | 5.49182900  | -0.91935600 | 2.95248600  |
| H | 4.18078300  | 0.08565400  | 4.31260800  |
| H | 5.31664600  | 1.16335200  | 3.50765600  |
| H | 6.25684000  | -1.10279700 | 3.71341700  |
| H | 4.85833300  | -1.80320100 | 2.86651300  |
| H | 6.00292300  | -0.78485200 | 1.99566500  |
| C | 4.00133300  | 0.88224600  | 1.04343200  |
| C | 4.90198000  | 2.10352200  | 0.82632600  |
| H | 3.08347200  | 1.02014800  | 0.45572600  |
| H | 4.49580600  | -0.01179300 | 0.64303600  |
| H | 5.09556000  | 2.23319100  | -0.24321800 |
| H | 4.43003600  | 3.02100900  | 1.18907000  |
| H | 5.86699500  | 1.98723200  | 1.33155900  |
| C | -1.06011800 | -0.09518700 | 1.38744700  |
| C | -0.36193200 | 0.22677200  | 0.21022400  |
| H | -1.34199500 | -1.14621000 | 1.47917900  |
| C | -0.38555300 | -0.73253100 | -0.85975100 |
| H | -0.91923000 | -1.67540800 | -0.61276200 |
| O | 0.11854000  | -0.58558500 | -1.97916200 |
| C | -0.91414100 | 0.62677600  | 2.65916500  |
| C | -0.77202600 | -0.13190500 | 3.82614000  |
| C | -0.90686700 | 2.02745400  | 2.75092700  |
| C | -0.56613000 | 0.49091400  | 5.05452300  |
| H | -0.77094400 | -1.21593100 | 3.76013100  |
| C | -0.72626800 | 2.64640700  | 3.98030900  |
| H | -1.05300400 | 2.63081000  | 1.86010300  |
| C | -0.54315200 | 1.87947800  | 5.13424100  |
| H | -0.42605700 | -0.11280200 | 5.94519300  |
| H | -0.72987300 | 3.73008100  | 4.04405500  |
| H | -0.39016600 | 2.36817400  | 6.09087700  |
| C | 0.35314600  | 1.43065300  | 0.00528600  |
| C | 0.97633100  | 2.46175000  | -0.16924300 |
| C | 1.84176700  | 3.59200300  | -0.21363500 |
| C | 2.61876300  | 3.84849000  | -1.35475000 |
| C | 1.97189900  | 4.41616200  | 0.91951300  |
| C | 3.54815700  | 4.87500000  | -1.35279600 |
| H | 2.50002600  | 3.22085700  | -2.22982200 |
| C | 2.89040200  | 5.45386400  | 0.92495000  |
| H | 1.36926200  | 4.21209500  | 1.79897300  |
| C | 3.67322800  | 5.65380700  | -0.20816700 |
| H | 4.17391000  | 5.07532900  | -2.21424000 |



|    |             |             |             |
|----|-------------|-------------|-------------|
| H  | 3.02232700  | 6.08886200  | 1.79203200  |
| C  | -3.55164100 | 4.35859900  | -1.10435900 |
| C  | -3.86444400 | 3.01261100  | -0.90183500 |
| C  | -5.12256600 | 2.60652500  | -0.48092300 |
| C  | -6.06284900 | 3.60505100  | -0.23621400 |
| C  | -5.77132500 | 4.95449200  | -0.41039000 |
| C  | -4.50453900 | 5.33603000  | -0.85413900 |
| C  | -2.13330000 | 4.50076100  | -1.61141100 |
| C  | -1.82724800 | 3.09915400  | -2.14350800 |
| C  | -2.62492400 | 2.18875600  | -1.18126200 |
| H  | -5.37989100 | 1.56083000  | -0.33460800 |
| H  | -6.53265600 | 5.69967000  | -0.21139100 |
| H  | -4.28018300 | 6.38610900  | -1.01055800 |
| H  | -2.02015400 | 5.24851000  | -2.39873600 |
| H  | -0.76244300 | 2.83793500  | -2.16301600 |
| H  | -2.04613900 | 2.02680800  | -0.26982700 |
| H  | -1.44130600 | 4.74771200  | -0.79751800 |
| Br | -7.79183800 | 3.10306000  | 0.35640900  |
| O  | -2.38679100 | 3.01632800  | -3.44499400 |
| C  | -2.18695400 | 1.75401700  | -4.03356400 |
| H  | -2.69329700 | 1.74098100  | -4.99883700 |
| H  | -1.11718700 | 1.54964300  | -4.18524500 |
| N  | -2.86584400 | 0.88172300  | -1.79716100 |
| C  | -3.27721300 | -0.29001400 | -1.25745000 |
| C  | -2.74633700 | 0.68403200  | -3.14641500 |
| N  | -3.10277700 | -0.52287900 | -3.47526100 |
| N  | -3.42767100 | -1.11610600 | -2.29808800 |
| C  | -3.95627800 | -2.45588200 | -2.31618300 |
| C  | -3.14634800 | -3.46927400 | -2.82684100 |
| C  | -5.26286000 | -2.66734200 | -1.85800400 |
| C  | -3.67934700 | -4.75949200 | -2.84761300 |
| C  | -5.74275300 | -3.97223800 | -1.90703500 |
| C  | -4.96651100 | -5.03008700 | -2.38889200 |
| H  | -3.06668200 | -5.57027000 | -3.23386300 |
| H  | -6.75325000 | -4.16871800 | -1.55727700 |
| C  | -5.51477100 | -6.43296500 | -2.39456400 |
| H  | -4.90132700 | -7.09611800 | -3.00737600 |
| H  | -5.54001300 | -6.83943300 | -1.37877300 |
| H  | -6.53738300 | -6.45234600 | -2.77982000 |
| C  | -6.12368600 | -1.55674300 | -1.31491900 |
| H  | -5.87266700 | -1.34290500 | -0.26846100 |
| H  | -6.01428800 | -0.63398500 | -1.89380300 |
| H  | -7.17472600 | -1.84904100 | -1.34387700 |
| C  | -1.76111300 | -3.20935700 | -3.35980800 |

|   |             |             |             |
|---|-------------|-------------|-------------|
| H | -1.80196500 | -2.94365400 | -4.42059100 |
| H | -1.25688200 | -2.38384100 | -2.84968800 |
| H | -1.15299900 | -4.11245300 | -3.26662400 |
| C | -3.85386600 | -0.27966600 | 2.55786000  |
| C | -3.37125700 | 0.19559400  | 1.20872500  |
| H | -3.74463000 | 0.52510900  | 3.29149500  |
| C | -3.38122700 | -0.75117300 | 0.17918300  |
| O | -3.33936600 | -1.98730300 | 0.33251100  |
| C | -5.30093900 | -0.71897100 | 2.43889200  |
| C | -5.63564600 | -2.07457300 | 2.45021500  |
| C | -6.31242900 | 0.22114500  | 2.20704100  |
| C | -6.95217500 | -2.48516900 | 2.24291500  |
| H | -4.85110300 | -2.80973200 | 2.60096400  |
| C | -7.62645100 | -0.18623900 | 1.99601800  |
| H | -6.06817400 | 1.28222200  | 2.17812100  |
| C | -7.95108900 | -1.54280600 | 2.01489200  |
| H | -7.19348200 | -3.54368800 | 2.25156100  |
| H | -8.39508200 | 0.55716400  | 1.81074000  |
| H | -8.97545200 | -1.86068400 | 1.84884200  |
| H | -3.48798500 | 1.24909900  | 0.99055000  |
| H | -3.24890500 | -1.12548100 | 2.90463900  |
| N | 4.67581000  | 6.71943900  | -0.19402000 |
| O | 4.71964100  | 7.44975700  | 0.78071100  |
| O | 5.41693700  | 6.81860200  | -1.15891000 |

#### R2OMe

|   |            |             |             |
|---|------------|-------------|-------------|
| C | 3.23775400 | 1.23560900  | -0.00139900 |
| C | 2.03573800 | 1.86490300  | 0.00572700  |
| H | 4.10437500 | 1.89628600  | 0.02247300  |
| C | 2.06807500 | 3.35101500  | 0.02938000  |
| H | 3.08856500 | 3.78216600  | 0.03611000  |
| O | 1.08595400 | 4.05735400  | 0.04023300  |
| C | 3.57120700 | -0.18412900 | -0.02696400 |
| C | 4.92798000 | -0.53159700 | 0.09046900  |
| C | 2.62404800 | -1.21288200 | -0.16878800 |
| C | 5.32925600 | -1.86101700 | 0.08006700  |
| H | 5.66865500 | 0.25654500  | 0.19373900  |
| C | 3.02952700 | -2.54140700 | -0.18302000 |
| H | 1.57484400 | -0.96892000 | -0.27566800 |
| C | 4.37867500 | -2.87110300 | -0.05589400 |
| H | 6.38090400 | -2.10946600 | 0.17531900  |
| H | 2.28826500 | -3.32575800 | -0.29578300 |
| H | 4.68753400 | -3.91123600 | -0.06632000 |
| C | 0.74373300 | 1.26663600  | 0.00684100  |

|   |             |             |             |
|---|-------------|-------------|-------------|
| C | -0.39138300 | 0.83789900  | 0.01763200  |
| C | -1.71509100 | 0.30022900  | 0.02864500  |
| C | -1.92548500 | -1.08092300 | 0.19685300  |
| C | -2.82556100 | 1.13724600  | -0.12865400 |
| C | -3.20582200 | -1.59943500 | 0.20469400  |
| H | -1.07223500 | -1.73922600 | 0.32464500  |
| C | -4.11781000 | 0.62333400  | -0.12240500 |
| H | -2.67172700 | 2.20327100  | -0.25775100 |
| C | -4.31121300 | -0.75131900 | 0.04468700  |
| H | -3.38346600 | -2.66131200 | 0.33398600  |
| H | -4.95698000 | 1.29595800  | -0.24727100 |
| O | -5.52218900 | -1.35460400 | 0.06651000  |
| C | -6.66934000 | -0.53586200 | -0.08779300 |
| H | -6.66056800 | -0.02227700 | -1.05491100 |
| H | -7.52659300 | -1.20518900 | -0.03965300 |
| H | -6.73742000 | 0.20399600  | 0.71668100  |

TS4COMe-RS

|    |             |             |             |
|----|-------------|-------------|-------------|
| C  | -3.74762600 | -1.14092300 | 3.36737400  |
| C  | -3.42347000 | -0.53292300 | 2.15113800  |
| C  | -3.81526400 | -1.07111600 | 0.93704300  |
| C  | -4.55537100 | -2.24917500 | 0.98250900  |
| C  | -4.88591700 | -2.88189100 | 2.17461400  |
| C  | -4.47660300 | -2.32085500 | 3.38524600  |
| C  | -3.20352600 | -0.33612100 | 4.52656600  |
| C  | -2.94434400 | 1.03189100  | 3.89028300  |
| C  | -2.56783400 | 0.68004300  | 2.43405700  |
| H  | -3.59035500 | -0.60470600 | -0.01750000 |
| H  | -5.46415900 | -3.79868500 | 2.15621200  |
| H  | -4.73974500 | -2.80061700 | 4.32264100  |
| H  | -3.89822300 | -0.24532600 | 5.36431600  |
| H  | -2.16513000 | 1.62837000  | 4.38341300  |
| H  | -1.49739100 | 0.45498900  | 2.34857100  |
| H  | -2.26737900 | -0.76451100 | 4.90270900  |
| Br | -5.11096600 | -3.02944600 | -0.65108600 |
| O  | -4.18680600 | 1.71655000  | 3.90382900  |
| C  | -4.16007100 | 3.00017200  | 3.32664200  |
| H  | -5.19312100 | 3.32336400  | 3.20468200  |
| H  | -3.62096600 | 3.71241200  | 3.96684500  |
| N  | -2.79032900 | 1.85838500  | 1.60009400  |
| C  | -2.22379500 | 2.15774700  | 0.43418200  |
| C  | -3.49097000 | 2.96434500  | 1.98774400  |
| N  | -3.36524500 | 3.92989700  | 1.11891200  |
| N  | -2.56946700 | 3.39974000  | 0.14654500  |

|   |             |             |             |
|---|-------------|-------------|-------------|
| C | -1.97499000 | 4.19618300  | -0.89807300 |
| C | -2.48824100 | 4.15078200  | -2.19365900 |
| C | -0.85040500 | 4.96073900  | -0.54384000 |
| C | -1.76324200 | 4.82113400  | -3.18558500 |
| C | -0.16985300 | 5.60589100  | -1.57078800 |
| C | -0.59688000 | 5.52421600  | -2.90116800 |
| H | -2.13203100 | 4.78446000  | -4.20786800 |
| H | 0.71679100  | 6.18727800  | -1.33060000 |
| C | 0.19656300  | 6.18784600  | -3.99546500 |
| H | 0.53851200  | 7.17924300  | -3.68661600 |
| H | 1.08869400  | 5.59770100  | -4.23042900 |
| H | -0.39481800 | 6.29099200  | -4.90736900 |
| C | -0.44046700 | 5.15441400  | 0.89407200  |
| H | -1.08575500 | 5.90584200  | 1.36057800  |
| H | -0.51595800 | 4.24122400  | 1.48975100  |
| H | 0.58953500  | 5.51485500  | 0.94545800  |
| C | -3.79116400 | 3.48308800  | -2.54191500 |
| H | -4.16163300 | 2.82287500  | -1.75808500 |
| H | -4.54935000 | 4.25349700  | -2.71694000 |
| H | -3.68751600 | 2.91317600  | -3.46882300 |
| H | -1.57608400 | 1.52203700  | -0.15412900 |
| B | -5.95499300 | 1.32081600  | 0.17842400  |
| F | -4.64536400 | 1.39523500  | -0.37265600 |
| F | -6.77797500 | 2.20410900  | -0.51368500 |
| F | -5.87584900 | 1.68658800  | 1.53024100  |
| F | -6.41845800 | 0.01189400  | 0.05412400  |
| N | -2.82285700 | -1.22293400 | -2.65969600 |
| C | -1.80745000 | -2.13989800 | -3.16941200 |
| C | -2.29582300 | -3.58205000 | -3.27416800 |
| H | -0.95784700 | -2.09032100 | -2.47727400 |
| H | -1.42023000 | -1.82435900 | -4.15666800 |
| H | -1.44306600 | -4.25991100 | -3.37860200 |
| H | -2.86077300 | -3.85985100 | -2.37997000 |
| H | -2.94016600 | -3.73315800 | -4.14412500 |
| C | -4.02751200 | -1.23443500 | -3.48772100 |
| C | -5.09467200 | -0.25408900 | -3.02316300 |
| H | -4.44630400 | -2.24470900 | -3.43435500 |
| H | -3.78334800 | -1.05242400 | -4.55254100 |
| H | -6.01220600 | -0.42150500 | -3.59470300 |
| H | -5.31462000 | -0.39033400 | -1.96180400 |
| H | -4.79589800 | 0.78755400  | -3.17238600 |
| C | -2.26341400 | 0.11367400  | -2.44649400 |
| C | -1.80565800 | 0.87307200  | -3.69505500 |
| H | -1.39892900 | -0.01624500 | -1.78115600 |

|   |             |             |             |
|---|-------------|-------------|-------------|
| H | -3.01170900 | 0.70555500  | -1.90498700 |
| H | -1.42285800 | 1.85840600  | -3.40765600 |
| H | -0.99735000 | 0.34947600  | -4.21304600 |
| H | -2.63043000 | 1.02200100  | -4.40089600 |
| C | 1.72296600  | 1.45186900  | -1.24794600 |
| C | 0.93154000  | 1.13771100  | -0.13463100 |
| H | 1.99310500  | 2.50580500  | -1.28662100 |
| C | 0.80117100  | 2.13957900  | 0.89221600  |
| H | 1.30094300  | 3.09664100  | 0.65363700  |
| O | 0.13624800  | 2.02422200  | 1.92707400  |
| C | 1.63658300  | 0.82461000  | -2.58729000 |
| C | 1.71735100  | 1.66321300  | -3.70860600 |
| C | 1.48542500  | -0.55211400 | -2.79587500 |
| C | 1.68075300  | 1.13920700  | -4.99749000 |
| H | 1.80280400  | 2.73607500  | -3.56193800 |
| C | 1.46154700  | -1.07828000 | -4.08336200 |
| H | 1.37787200  | -1.21788500 | -1.95005600 |
| C | 1.56691600  | -0.23653600 | -5.18982600 |
| H | 1.74260000  | 1.80742600  | -5.85067100 |
| H | 1.35437800  | -2.15218100 | -4.20608000 |
| H | 1.55066700  | -0.64881800 | -6.19359800 |
| C | 0.40826300  | -0.16120200 | 0.11281300  |
| C | -0.01544900 | -1.27798300 | 0.35198900  |
| C | -0.40761400 | -2.62716300 | 0.62431600  |
| C | 0.42695600  | -3.46434700 | 1.38588800  |
| C | -1.57588200 | -3.15735100 | 0.07141800  |
| C | 0.10050600  | -4.79376700 | 1.57885500  |
| H | 1.34382700  | -3.06293500 | 1.80819000  |
| C | -1.92125500 | -4.48932200 | 0.27704100  |
| H | -2.21641600 | -2.52749200 | -0.54216800 |
| C | -1.07837100 | -5.31340700 | 1.02616000  |
| H | 0.73777900  | -5.45428900 | 2.15663600  |
| H | -2.85744500 | -4.85312400 | -0.13072800 |
| C | 5.59362600  | -3.55715700 | -1.34460500 |
| C | 4.70115600  | -2.64704900 | -0.77022000 |
| C | 3.33082200  | -2.75491700 | -0.94299600 |
| C | 2.87571900  | -3.78601000 | -1.76863200 |
| C | 3.74826600  | -4.66925900 | -2.39532300 |
| C | 5.12207800  | -4.56205100 | -2.17422900 |
| C | 6.99867300  | -3.29630800 | -0.84951600 |
| C | 6.73328100  | -2.50648500 | 0.43484200  |
| C | 5.50007700  | -1.65708100 | 0.05301800  |
| H | 2.63247400  | -2.08463400 | -0.44516100 |
| H | 3.35263700  | -5.45500000 | -3.02832000 |

|    |            |             |             |
|----|------------|-------------|-------------|
| H  | 5.80128600 | -5.27755000 | -2.62617400 |
| H  | 7.56117800 | -4.20749800 | -0.63771200 |
| H  | 7.57623300 | -1.90003500 | 0.78693500  |
| H  | 5.80499700 | -0.78830100 | -0.53886400 |
| H  | 7.57432400 | -2.68714100 | -1.55471000 |
| Br | 1.01273600 | -4.01101400 | -2.02735000 |
| O  | 6.34387700 | -3.45841800 | 1.41353100  |
| C  | 5.98686300 | -2.89683000 | 2.65188900  |
| H  | 5.52309300 | -3.68066800 | 3.25216600  |
| H  | 6.86809700 | -2.51916200 | 3.18859000  |
| N  | 4.84179200 | -1.15398900 | 1.26005000  |
| C  | 4.09513200 | -0.03714100 | 1.46482900  |
| C  | 5.03593800 | -1.74805000 | 2.47555200  |
| N  | 4.43642200 | -1.08184100 | 3.41803200  |
| N  | 3.86343300 | -0.02329600 | 2.78540900  |
| C  | 3.20357800 | 0.94881100  | 3.63348100  |
| C  | 3.96255300 | 2.02104500  | 4.11330000  |
| C  | 1.90200000 | 0.68344300  | 4.04709700  |
| C  | 3.33384600 | 2.89640500  | 4.99212500  |
| C  | 1.31911700 | 1.59142600  | 4.93257500  |
| C  | 2.00902900 | 2.70637400  | 5.39950200  |
| H  | 3.89445700 | 3.74495800  | 5.37605400  |
| H  | 0.29914400 | 1.41272500  | 5.26362200  |
| C  | 1.34400700 | 3.69755000  | 6.31837700  |
| H  | 0.97216500 | 4.55571800  | 5.74947500  |
| H  | 0.49414900 | 3.24859100  | 6.83672900  |
| H  | 2.04560700 | 4.07735500  | 7.06491400  |
| C  | 1.17176200 | -0.54311200 | 3.58189400  |
| H  | 1.11406100 | -0.57283000 | 2.49157800  |
| H  | 1.67474600 | -1.45237500 | 3.92846700  |
| H  | 0.15089800 | -0.54982300 | 3.97006500  |
| C  | 5.39730900 | 2.20876100  | 3.70435500  |
| H  | 5.97141000 | 1.28707200  | 3.84511800  |
| H  | 5.45189600 | 2.48668200  | 2.64868600  |
| H  | 5.86465600 | 2.99455700  | 4.29960400  |
| C  | 4.55965300 | 1.87893000  | -1.85741300 |
| C  | 3.85162000 | 0.95669700  | -0.86122500 |
| H  | 4.48392000 | 1.37764000  | -2.82774800 |
| C  | 3.85846400 | 1.14840700  | 0.53429400  |
| O  | 3.63333300 | 2.20216600  | 1.15402100  |
| C  | 4.17621900 | 3.33574800  | -2.08797300 |
| C  | 4.20876700 | 3.81618800  | -3.40350500 |
| C  | 3.86761500 | 4.24026500  | -1.06604800 |
| C  | 3.92588600 | 5.14746700  | -3.69726400 |

|   |             |             |             |
|---|-------------|-------------|-------------|
| H | 4.44395700  | 3.12895100  | -4.21296400 |
| C | 3.57620100  | 5.57222200  | -1.35825800 |
| H | 3.83759900  | 3.88924900  | -0.04120600 |
| C | 3.60088800  | 6.03346600  | -2.67188000 |
| H | 3.95221300  | 5.48997900  | -4.72733000 |
| H | 3.33144400  | 6.25342500  | -0.54803000 |
| H | 3.37084000  | 7.07065200  | -2.89564000 |
| H | 3.89405700  | -0.08071200 | -1.18462300 |
| H | 5.63159300  | 1.86893500  | -1.61031400 |
| O | -1.32122800 | -6.62344700 | 1.27597300  |
| C | -2.51767800 | -7.17390300 | 0.75263900  |
| H | -2.53184300 | -8.21787900 | 1.06149700  |
| H | -3.39790500 | -6.66051900 | 1.15514000  |
| H | -2.53472800 | -7.11492900 | -0.34094600 |

TS4COMe-SS

|    |             |             |             |
|----|-------------|-------------|-------------|
| C  | -6.11817300 | -1.80406600 | 1.92980300  |
| C  | -5.22081400 | -1.03570400 | 1.18114200  |
| C  | -4.98169800 | -1.28853500 | -0.16209800 |
| C  | -5.71339200 | -2.32343100 | -0.73938700 |
| C  | -6.60688500 | -3.10741200 | -0.01746400 |
| C  | -6.80645900 | -2.85277800 | 1.33837200  |
| C  | -6.21487300 | -1.28701400 | 3.34640200  |
| C  | -5.70329200 | 0.14463900  | 3.19727900  |
| C  | -4.62056200 | 0.01355000  | 2.09858800  |
| H  | -4.30040400 | -0.70155900 | -0.77101300 |
| H  | -7.15145300 | -3.90035500 | -0.51726100 |
| H  | -7.50896500 | -3.45273000 | 1.90892700  |
| H  | -7.22899200 | -1.29659000 | 3.75156600  |
| H  | -5.31207000 | 0.59436400  | 4.11901900  |
| H  | -3.67345300 | -0.33448500 | 2.52656200  |
| H  | -5.55897300 | -1.84966200 | 4.02068700  |
| Br | -5.52316300 | -2.66228200 | -2.59283800 |
| O  | -6.79600800 | 0.89405000  | 2.69188900  |
| C  | -6.51522400 | 2.24557200  | 2.42149000  |
| H  | -7.35328600 | 2.64972700  | 1.85705300  |
| H  | -6.38047300 | 2.81489100  | 3.35236900  |
| N  | -4.37607300 | 1.33774900  | 1.52714700  |
| C  | -3.29510800 | 1.80230400  | 0.89208600  |
| C  | -5.26269400 | 2.37543900  | 1.61213500  |
| N  | -4.77278000 | 3.45161400  | 1.06592300  |
| N  | -3.54584500 | 3.07035800  | 0.61232100  |
| C  | -2.63349500 | 4.06612800  | 0.10790500  |
| C  | -2.76380400 | 4.52936300  | -1.20046800 |

|   |             |             |             |
|---|-------------|-------------|-------------|
| C | -1.70140300 | 4.58136100  | 1.01771600  |
| C | -1.89484300 | 5.55054600  | -1.59805700 |
| C | -0.87870800 | 5.61150600  | 0.57623800  |
| C | -0.96012100 | 6.10813900  | -0.72875000 |
| H | -1.97711900 | 5.93299200  | -2.61287300 |
| H | -0.17032300 | 6.04705000  | 1.27625800  |
| C | -0.05214700 | 7.22005500  | -1.18843900 |
| H | 0.29494800  | 7.82218000  | -0.34469300 |
| H | 0.83110200  | 6.81715200  | -1.69712100 |
| H | -0.56247000 | 7.87869000  | -1.89474500 |
| C | -1.58532000 | 4.03546300  | 2.41430300  |
| H | -2.56372600 | 3.95138800  | 2.89766200  |
| H | -1.12571100 | 3.04263000  | 2.38035600  |
| H | -0.95534100 | 4.68414000  | 3.02500100  |
| C | -3.78414800 | 3.99503300  | -2.16942800 |
| H | -4.44497200 | 3.24677300  | -1.73411000 |
| H | -4.39488900 | 4.81522600  | -2.55693300 |
| H | -3.27122000 | 3.54039600  | -3.02433100 |
| H | -2.34727800 | 1.29746200  | 0.71616600  |
| B | -6.60951000 | 1.42285200  | -1.38046400 |
| F | -5.22126000 | 1.41679300  | -1.08493900 |
| F | -6.87339900 | 2.48678000  | -2.24264100 |
| F | -7.31159500 | 1.58945800  | -0.17734100 |
| F | -6.95045000 | 0.20894400  | -1.97485800 |
| N | -2.58561200 | -0.70132000 | -2.71212200 |
| C | -1.45990200 | -1.62734400 | -2.67419900 |
| C | -1.82265700 | -3.05100600 | -3.08240500 |
| H | -1.09830000 | -1.64574900 | -1.64148200 |
| H | -0.61193200 | -1.27913600 | -3.29750100 |
| H | -1.02457900 | -3.73349400 | -2.77397200 |
| H | -2.75908700 | -3.34458300 | -2.59969800 |
| H | -1.95506600 | -3.15737300 | -4.16303800 |
| C | -3.14225900 | -0.55705800 | -4.05143700 |
| C | -4.32427600 | 0.40201600  | -4.10142800 |
| H | -3.48863300 | -1.54634500 | -4.36833300 |
| H | -2.36780700 | -0.24761500 | -4.78166500 |
| H | -4.80255400 | 0.34700700  | -5.08361600 |
| H | -5.05893800 | 0.14164000  | -3.33515500 |
| H | -4.01989800 | 1.44065300  | -3.93883900 |
| C | -2.25223700 | 0.56887100  | -2.06823100 |
| C | -1.22717400 | 1.45935100  | -2.77930600 |
| H | -1.86225000 | 0.31322200  | -1.07685200 |
| H | -3.18172700 | 1.12764900  | -1.91380700 |
| H | -1.06956800 | 2.37090300  | -2.19231200 |



|   |             |             |             |
|---|-------------|-------------|-------------|
| H | -0.25865900 | 0.95649600  | -2.88063600 |
| H | -1.56770800 | 1.74904500  | -3.77937400 |
| C | 1.59692800  | -0.93970800 | -0.74658700 |
| C | 0.58069700  | -0.29831600 | -0.00265700 |
| H | 2.03999400  | -0.28771900 | -1.50081900 |
| C | 0.47807400  | 1.13386900  | -0.06388500 |
| H | 1.25550300  | 1.62684000  | -0.67974400 |
| O | -0.41162400 | 1.81764300  | 0.45012500  |
| C | 1.54110400  | -2.34999000 | -1.21883400 |
| C | 1.90775100  | -2.61643800 | -2.54656200 |
| C | 1.13560400  | -3.42478000 | -0.41442000 |
| C | 1.89438500  | -3.91236900 | -3.05413900 |
| H | 2.17915600  | -1.78830800 | -3.19880600 |
| C | 1.12111300  | -4.72078100 | -0.92308800 |
| H | 0.83183400  | -3.24700300 | 0.60981200  |
| C | 1.50673400  | -4.97285100 | -2.23875800 |
| H | 2.17721100  | -4.08966400 | -4.08683600 |
| H | 0.80684800  | -5.53919400 | -0.28340900 |
| H | 1.49492300  | -5.98567900 | -2.62741900 |
| C | -0.40194400 | -1.01945200 | 0.73025400  |
| C | -1.24256500 | -1.70272600 | 1.28544600  |
| C | -2.21356600 | -2.64034700 | 1.76250500  |
| C | -2.59701200 | -2.71623500 | 3.10432400  |
| C | -2.80258400 | -3.52951200 | 0.84104900  |
| C | -3.56413300 | -3.62846200 | 3.52474900  |
| H | -2.13341300 | -2.05444700 | 3.82974400  |
| C | -3.75526200 | -4.44006500 | 1.24933500  |
| H | -2.51070900 | -3.47212200 | -0.20406200 |
| C | -4.15845100 | -4.48082400 | 2.59112600  |
| H | -3.84339800 | -3.66189700 | 4.57113400  |
| H | -4.23610500 | -5.10721000 | 0.54211000  |
| C | 6.72917100  | -2.45208800 | -2.53217500 |
| C | 6.17688900  | -1.60775800 | -1.56666900 |
| C | 6.67094800  | -1.55230700 | -0.27150300 |
| C | 7.73645800  | -2.39657200 | 0.03614500  |
| C | 8.28989200  | -3.26332600 | -0.90135000 |
| C | 7.78409800  | -3.29008800 | -2.20080400 |
| C | 6.03308800  | -2.26285500 | -3.86021100 |
| C | 5.37936400  | -0.88908000 | -3.69695600 |
| C | 5.01908200  | -0.85822500 | -2.19382000 |
| H | 6.25702500  | -0.88898000 | 0.48326000  |
| H | 9.11890600  | -3.90189200 | -0.61945100 |
| H | 8.22598800  | -3.94938500 | -2.94066700 |
| H | 6.70844100  | -2.27134400 | -4.71779300 |

|    |            |             |             |
|----|------------|-------------|-------------|
| H  | 4.50489400 | -0.72539400 | -4.33931800 |
| H  | 4.07578500 | -1.38996600 | -2.04185200 |
| H  | 5.26253000 | -3.02637200 | -4.01604100 |
| Br | 8.46325900 | -2.35661800 | 1.78498800  |
| O  | 6.37953800 | 0.08063900  | -3.95945500 |
| C  | 5.91187300 | 1.40037400  | -3.82079100 |
| H  | 6.75987600 | 2.07519800  | -3.94026800 |
| H  | 5.15880600 | 1.63892600  | -4.58471400 |
| N  | 4.83969300 | 0.52429300  | -1.74001600 |
| C  | 4.24850200 | 1.02274400  | -0.62524700 |
| C  | 5.29595400 | 1.59142300  | -2.46681300 |
| N  | 5.03955500 | 2.71298800  | -1.86054100 |
| N  | 4.38983900 | 2.34724200  | -0.72319600 |
| C  | 3.99763300 | 3.38636000  | 0.19651000  |
| C  | 3.00102600 | 4.27047100  | -0.20837400 |
| C  | 4.67698100 | 3.48858200  | 1.41631700  |
| C  | 2.69660200 | 5.31852900  | 0.66197400  |
| C  | 4.32307200 | 4.54514700  | 2.24808500  |
| C  | 3.33719700 | 5.46969800  | 1.88798600  |
| H  | 1.93344700 | 6.03126300  | 0.36249400  |
| H  | 4.83062800 | 4.65078400  | 3.20351300  |
| C  | 2.95158300 | 6.58466500  | 2.82439100  |
| H  | 2.22489000 | 6.22912800  | 3.56229200  |
| H  | 3.81895400 | 6.96081100  | 3.37167400  |
| H  | 2.49565600 | 7.41621800  | 2.28200300  |
| C  | 5.71320500 | 2.48102600  | 1.83804300  |
| H  | 5.22661700 | 1.57023300  | 2.20869200  |
| H  | 6.37492100 | 2.20302200  | 1.01167800  |
| H  | 6.32879400 | 2.88447600  | 2.64351100  |
| C  | 2.25069300 | 4.13948200  | -1.50930800 |
| H  | 2.37610600 | 3.15891900  | -1.97287500 |
| H  | 1.18125800 | 4.29451900  | -1.33069600 |
| H  | 2.58956500 | 4.88937600  | -2.23092200 |
| C  | 2.86433700 | -1.64877500 | 1.80271800  |
| C  | 3.33356100 | -1.05257900 | 0.49233800  |
| H  | 2.85655600 | -2.73925700 | 1.71606100  |
| C  | 3.48727000 | 0.34963900  | 0.49086600  |
| O  | 2.86843600 | 1.10862400  | 1.25182800  |
| C  | 3.76149600 | -1.22464100 | 2.94995500  |
| C  | 5.06309500 | -1.72303500 | 3.06789500  |
| C  | 3.31996700 | -0.27932800 | 3.87884600  |
| C  | 5.89984100 | -1.28922400 | 4.09391100  |
| H  | 5.42853000 | -2.45667100 | 2.35045400  |
| C  | 4.15344100 | 0.15486600  | 4.90712700  |

|   |             |             |             |
|---|-------------|-------------|-------------|
| H | 2.31967400  | 0.12964500  | 3.77525500  |
| C | 5.44708400  | -0.34920700 | 5.01777200  |
| H | 6.90677500  | -1.68602700 | 4.16866400  |
| H | 3.79316800  | 0.89231200  | 5.61780300  |
| H | 6.09958800  | -0.01182200 | 5.81677500  |
| H | 4.01146300  | -1.66823700 | -0.08563600 |
| H | 1.84122900  | -1.31647800 | 2.01064700  |
| O | -5.13681000 | -5.37265100 | 2.88258900  |
| C | -5.67344600 | -5.34879900 | 4.19231400  |
| H | -6.47816800 | -6.08221700 | 4.20525900  |
| H | -4.92008400 | -5.62247900 | 4.93871100  |
| H | -6.07798900 | -4.35807000 | 4.43181000  |

TS4COMe-RR

|    |             |             |             |
|----|-------------|-------------|-------------|
| C  | -0.55096300 | -4.47196800 | 0.92409600  |
| C  | -1.08060700 | -3.19145100 | 0.76251500  |
| C  | -0.94441600 | -2.49150700 | -0.43057400 |
| C  | -0.24339000 | -3.11898600 | -1.45567700 |
| C  | 0.28043500  | -4.40425100 | -1.32393200 |
| C  | 0.12800000  | -5.08746000 | -0.12082900 |
| C  | -0.80926000 | -5.00262700 | 2.31261900  |
| C  | -1.84002500 | -4.02897900 | 2.89704700  |
| C  | -1.64745700 | -2.72161300 | 2.08182700  |
| H  | -1.36710400 | -1.50505500 | -0.60411000 |
| H  | 0.79907900  | -4.86319700 | -2.15924100 |
| H  | 0.52830000  | -6.09013100 | -0.00996500 |
| H  | -1.21857500 | -6.01583400 | 2.31892500  |
| H  | -1.70823600 | -3.85042600 | 3.97260500  |
| H  | -0.93054200 | -2.04876400 | 2.56347300  |
| H  | 0.10662300  | -5.01353300 | 2.91319600  |
| Br | 0.03582000  | -2.18034500 | -3.06917800 |
| O  | -3.12153400 | -4.58069200 | 2.66108900  |
| C  | -4.15387100 | -3.78246400 | 3.19405600  |
| H  | -5.10258300 | -4.24911500 | 2.94112800  |
| H  | -4.05176300 | -3.68220800 | 4.28410200  |
| N  | -2.91269800 | -1.98732600 | 2.01906400  |
| C  | -3.16721900 | -0.79269900 | 1.47832100  |
| C  | -4.09176300 | -2.43506900 | 2.54913400  |
| N  | -5.03592900 | -1.55137900 | 2.40518800  |
| N  | -4.43926700 | -0.53390400 | 1.72659400  |
| C  | -5.15044600 | 0.67786000  | 1.43308000  |
| C  | -6.34209700 | 0.57883300  | 0.70512500  |
| C  | -4.64392800 | 1.88447500  | 1.92854200  |
| C  | -7.03902000 | 1.76275100  | 0.47395800  |

|   |             |             |             |
|---|-------------|-------------|-------------|
| C | -5.38860200 | 3.03442400  | 1.66584300  |
| C | -6.57935800 | 2.99512100  | 0.94329600  |
| H | -7.96418300 | 1.71804700  | -0.09606600 |
| H | -5.02362900 | 3.98669600  | 2.03936800  |
| C | -7.35441000 | 4.25519100  | 0.66292800  |
| H | -8.41974100 | 4.11352900  | 0.86365900  |
| H | -6.99181700 | 5.08399600  | 1.27614700  |
| H | -7.24774300 | 4.55264900  | -0.38485700 |
| C | -3.37195400 | 1.96672400  | 2.73490000  |
| H | -3.34014800 | 1.19660000  | 3.51282800  |
| H | -2.47595600 | 1.84304900  | 2.11576500  |
| H | -3.30787700 | 2.94268900  | 3.21939900  |
| C | -6.83836400 | -0.73776300 | 0.17214200  |
| H | -6.03022000 | -1.34122400 | -0.24735700 |
| H | -7.29429000 | -1.33633100 | 0.96592000  |
| H | -7.58614500 | -0.56886400 | -0.60533700 |
| H | -2.45465500 | -0.13371200 | 0.99851300  |
| B | -5.11907000 | -3.89301900 | -0.41931500 |
| F | -4.22032100 | -2.82421700 | -0.18632400 |
| F | -6.17641600 | -3.42141800 | -1.21026800 |
| F | -5.62361100 | -4.33389400 | 0.81417000  |
| F | -4.45703400 | -4.92875600 | -1.06805400 |
| N | -2.82831300 | -0.43128100 | -2.91042700 |
| C | -2.04494200 | 0.66499600  | -3.46362000 |
| C | -2.64732400 | 1.50919400  | -4.59672500 |
| H | -1.10394100 | 0.23350000  | -3.83153700 |
| H | -1.76384200 | 1.31785300  | -2.63008300 |
| H | -1.86971200 | 2.16009300  | -5.00864000 |
| H | -3.01984100 | 0.88049200  | -5.41116800 |
| H | -3.46797000 | 2.14975500  | -4.26288300 |
| C | -3.22606800 | -1.41188600 | -3.91144800 |
| C | -3.64095800 | -2.73910000 | -3.29324400 |
| H | -2.35582100 | -1.57210600 | -4.55948900 |
| H | -4.03610600 | -1.04100600 | -4.56534200 |
| H | -3.81368600 | -3.48077000 | -4.07914800 |
| H | -2.85572000 | -3.10934400 | -2.62844600 |
| H | -4.55646600 | -2.65663400 | -2.70369600 |
| C | -3.88816300 | -0.05159300 | -1.97938100 |
| C | -5.21071800 | 0.42350100  | -2.59912500 |
| H | -3.48013200 | 0.73313700  | -1.32606600 |
| H | -4.09542600 | -0.91561000 | -1.33550900 |
| H | -5.85128500 | 0.86219900  | -1.82976600 |
| H | -5.05491100 | 1.17927300  | -3.37298600 |
| H | -5.75383900 | -0.41279600 | -3.05142200 |

|   |             |             |             |
|---|-------------|-------------|-------------|
| C | 1.44875600  | 0.67449600  | -1.07376600 |
| C | 0.38782500  | 0.87648300  | -0.16090400 |
| H | 1.93170700  | -0.29602000 | -0.95054900 |
| C | 0.35360400  | 0.04350400  | 1.01059600  |
| H | 1.19222400  | -0.67777100 | 1.07910100  |
| O | -0.52677900 | 0.03335500  | 1.87844700  |
| C | 1.47287500  | 1.11412200  | -2.49348900 |
| C | 2.20842700  | 0.34506800  | -3.40721700 |
| C | 0.80635300  | 2.25108900  | -2.97149800 |
| C | 2.26211800  | 0.68361600  | -4.75442800 |
| H | 2.71488600  | -0.55108100 | -3.06000800 |
| C | 0.87159300  | 2.59797600  | -4.31848900 |
| H | 0.23088900  | 2.86603400  | -2.29019300 |
| C | 1.59117700  | 1.81425700  | -5.21714000 |
| H | 2.82532700  | 0.06144100  | -5.44259500 |
| H | 0.35106200  | 3.48525900  | -4.66540100 |
| H | 1.63154800  | 2.08328000  | -6.26768600 |
| C | -0.62381400 | 1.87354100  | -0.24979000 |
| C | -1.52629200 | 2.69096400  | -0.26961900 |
| C | -2.55276100 | 3.68826700  | -0.35220400 |
| C | -3.53167000 | 3.62906900  | -1.36173600 |
| C | -2.58802200 | 4.75852200  | 0.54825000  |
| C | -4.50854900 | 4.60197700  | -1.45718500 |
| H | -3.51610200 | 2.80688100  | -2.06988600 |
| C | -3.56380000 | 5.74851900  | 0.45619800  |
| H | -1.83449300 | 4.81813100  | 1.32720200  |
| C | -4.53072100 | 5.66964800  | -0.54955600 |
| H | -5.26790000 | 4.56166700  | -2.23145600 |
| H | -3.55889500 | 6.56638700  | 1.16636600  |
| C | 7.08857500  | -0.46094700 | -1.75979900 |
| C | 5.95286800  | -0.21160800 | -0.99299500 |
| C | 4.82279300  | -1.00009800 | -1.07737100 |
| C | 4.83160200  | -2.05117500 | -1.98529400 |
| C | 5.92977000  | -2.29869500 | -2.80266100 |
| C | 7.07138900  | -1.49797600 | -2.68502100 |
| C | 8.20287900  | 0.46716800  | -1.32369000 |
| C | 7.76968600  | 0.85174700  | 0.10081500  |
| C | 6.22434300  | 0.90563000  | -0.01328700 |
| H | 3.95629000  | -0.83785300 | -0.44586400 |
| H | 5.90903300  | -3.12435700 | -3.50450900 |
| H | 7.94314300  | -1.71630600 | -3.29316500 |
| H | 9.18715900  | -0.00444200 | -1.30813600 |
| H | 8.19649100  | 1.79279300  | 0.46659700  |
| H | 5.89529000  | 1.88972700  | -0.36385400 |

|    |             |             |             |
|----|-------------|-------------|-------------|
| H  | 8.25582300  | 1.35972300  | -1.95594900 |
| Br | 3.27597200  | -3.12749600 | -2.03359700 |
| O  | 8.15676200  | -0.23074000 | 0.93316900  |
| C  | 7.72099400  | -0.10039100 | 2.26721100  |
| H  | 8.04093000  | -0.98531900 | 2.81681500  |
| H  | 8.15165800  | 0.79202700  | 2.74211200  |
| N  | 5.57116800  | 0.62536800  | 1.26753500  |
| C  | 4.24954600  | 0.62466900  | 1.56978300  |
| C  | 6.22710000  | 0.00341700  | 2.29380100  |
| N  | 5.39222900  | -0.39172000 | 3.21037800  |
| N  | 4.17259300  | -0.00241400 | 2.74754900  |
| C  | 2.98872500  | -0.42257200 | 3.45380700  |
| C  | 2.48969900  | 0.40509000  | 4.46056200  |
| C  | 2.44504300  | -1.66618500 | 3.12632200  |
| C  | 1.34720800  | -0.02725100 | 5.12659600  |
| C  | 1.31511900  | -2.05916800 | 3.84378700  |
| C  | 0.73987000  | -1.24648700 | 4.82048400  |
| H  | 0.92157700  | 0.60260700  | 5.90291200  |
| H  | 0.88090100  | -3.03419700 | 3.63491500  |
| C  | -0.52491900 | -1.66895400 | 5.51939100  |
| H  | -0.64532700 | -1.15078500 | 6.47266600  |
| H  | -1.39908400 | -1.42604400 | 4.90198900  |
| H  | -0.53400700 | -2.74562200 | 5.70931000  |
| C  | 3.02952200  | -2.55638700 | 2.05620300  |
| H  | 2.64012300  | -2.31629600 | 1.05771800  |
| H  | 4.12001400  | -2.48680100 | 2.01561900  |
| H  | 2.76518400  | -3.59790000 | 2.25145500  |
| C  | 3.16553400  | 1.70643500  | 4.78911500  |
| H  | 4.21342100  | 1.54542400  | 5.06058800  |
| H  | 3.13601100  | 2.36593600  | 3.91693600  |
| H  | 2.66537800  | 2.19959300  | 5.62360700  |
| C  | 2.66623200  | 3.24670100  | -0.65935000 |
| C  | 3.12525700  | 1.82102700  | -0.40283200 |
| H  | 1.66021500  | 3.38338400  | -0.24869000 |
| C  | 3.13468300  | 1.45443000  | 0.96264800  |
| O  | 2.25843100  | 1.80439900  | 1.77080000  |
| C  | 3.63193600  | 4.21517700  | -0.01219000 |
| C  | 4.82827000  | 4.55381300  | -0.65396800 |
| C  | 3.38558700  | 4.73022000  | 1.26412200  |
| C  | 5.76243500  | 5.37987600  | -0.03358400 |
| H  | 5.02254700  | 4.16733200  | -1.65280400 |
| C  | 4.31799900  | 5.55841500  | 1.88629300  |
| H  | 2.46061400  | 4.46586900  | 1.76823800  |
| C  | 5.50983200  | 5.88343700  | 1.24182200  |

|   |             |            |             |
|---|-------------|------------|-------------|
| H | 6.68312700  | 5.63747100 | -0.54814700 |
| H | 4.11147100  | 5.95273100 | 2.87659600  |
| H | 6.23409900  | 6.53028900 | 1.72627800  |
| H | 3.91963900  | 1.46298100 | -1.05086400 |
| H | 2.62502400  | 3.43021400 | -1.73479900 |
| O | -5.52468600 | 6.57549600 | -0.72908900 |
| C | -5.60918500 | 7.64603500 | 0.19388300  |
| H | -4.71245300 | 8.27380800 | 0.15623100  |
| H | -6.47723400 | 8.23357600 | -0.10070200 |
| H | -5.74794100 | 7.27649600 | 1.21654600  |

TS4COMe-SR

|    |            |             |             |
|----|------------|-------------|-------------|
| C  | 1.32860600 | -4.75554600 | 0.46787600  |
| C  | 1.72357000 | -3.43751300 | 0.23425600  |
| C  | 2.00366600 | -2.55630200 | 1.27177300  |
| C  | 1.87684400 | -3.05308500 | 2.56589900  |
| C  | 1.45941100 | -4.35559100 | 2.82706700  |
| C  | 1.18063000 | -5.21777200 | 1.76848700  |
| C  | 1.12937600 | -5.49563300 | -0.83499800 |
| C  | 1.89109000 | -4.63378900 | -1.84847800 |
| C  | 1.76551400 | -3.20841100 | -1.26084400 |
| H  | 2.37100600 | -1.54471200 | 1.11914700  |
| H  | 1.37894200 | -4.69706500 | 3.85257000  |
| H  | 0.87690100 | -6.24072200 | 1.96614400  |
| H  | 1.52479300 | -6.51355700 | -0.82714700 |
| H  | 1.48836000 | -4.68554500 | -2.86930400 |
| H  | 0.85045800 | -2.74658500 | -1.63721500 |
| H  | 0.06711300 | -5.54246000 | -1.10196000 |
| Br | 2.33923000 | -1.94223800 | 4.02891400  |
| O  | 3.24026300 | -5.05527200 | -1.83440700 |
| C  | 4.06845500 | -4.31693400 | -2.70224800 |
| H  | 5.09213200 | -4.64987300 | -2.54554000 |
| H  | 3.77772800 | -4.47150800 | -3.75110700 |
| N  | 2.87206800 | -2.37704700 | -1.72604100 |
| C  | 3.04721100 | -1.06097000 | -1.59357200 |
| C  | 3.97390200 | -2.85814900 | -2.37536900 |
| N  | 4.78774700 | -1.89035300 | -2.68877300 |
| N  | 4.19354500 | -0.77352000 | -2.18553800 |
| C  | 4.77409400 | 0.52683900  | -2.37336800 |
| C  | 6.09421100 | 0.73608400  | -1.95088100 |
| C  | 4.00172600 | 1.51108700  | -3.00105600 |
| C  | 6.63547600 | 1.99921900  | -2.17980100 |
| C  | 4.59991500 | 2.75743600  | -3.19672700 |
| C  | 5.90626400 | 3.02137800  | -2.79001700 |

|   |             |             |             |
|---|-------------|-------------|-------------|
| H | 7.65261300  | 2.19432500  | -1.84936000 |
| H | 4.02931400  | 3.53647200  | -3.69713400 |
| C | 6.50979800  | 4.39011300  | -2.95986300 |
| H | 7.52828700  | 4.32876900  | -3.35115500 |
| H | 5.91496800  | 5.00785400  | -3.63653000 |
| H | 6.56186800  | 4.89940200  | -1.99157500 |
| C | 2.58930600  | 1.26346800  | -3.47189000 |
| H | 2.49441600  | 0.30008400  | -3.98196800 |
| H | 1.86693300  | 1.25946100  | -2.64601500 |
| H | 2.29189900  | 2.04707900  | -4.17217000 |
| C | 6.89868600  | -0.32926700 | -1.25635600 |
| H | 6.29332500  | -0.90584100 | -0.55444100 |
| H | 7.31306900  | -1.03688400 | -1.98061300 |
| H | 7.72840700  | 0.13062700  | -0.71572100 |
| H | 2.37385400  | -0.36048100 | -1.11862000 |
| B | 5.44314400  | -3.14127500 | 0.71984400  |
| F | 4.68585200  | -2.01456300 | 0.30508400  |
| F | 6.76124000  | -2.73523000 | 0.93949700  |
| F | 5.40982100  | -4.09552700 | -0.30807300 |
| F | 4.88467100  | -3.66593300 | 1.88209400  |
| N | 3.61158300  | 0.77822600  | 2.42357500  |
| C | 2.54414800  | 1.56053400  | 3.03858300  |
| C | 2.93303000  | 2.83407700  | 3.80254200  |
| H | 2.01413400  | 0.89804800  | 3.73855000  |
| H | 1.82513600  | 1.80934400  | 2.25200100  |
| H | 2.02641100  | 3.30012300  | 4.20433500  |
| H | 3.58692100  | 2.60790400  | 4.64999300  |
| H | 3.43898900  | 3.56793600  | 3.16986500  |
| C | 4.72830700  | 0.54374600  | 3.32720000  |
| C | 5.62866300  | -0.60114500 | 2.89043900  |
| H | 4.29126400  | 0.29098300  | 4.30317800  |
| H | 5.33256200  | 1.45502000  | 3.49172600  |
| H | 6.42057100  | -0.75170000 | 3.63102600  |
| H | 5.05320600  | -1.52381800 | 2.79548700  |
| H | 6.10915600  | -0.41395300 | 1.92696000  |
| C | 3.97102600  | 1.15292000  | 1.06107900  |
| C | 4.73129500  | 2.46845200  | 0.85655800  |
| H | 3.03362100  | 1.20874400  | 0.49224100  |
| H | 4.54801700  | 0.32363500  | 0.63221000  |
| H | 4.90557100  | 2.62839200  | -0.21229800 |
| H | 4.15834200  | 3.32482700  | 1.22335800  |
| H | 5.70435000  | 2.45566800  | 1.36000000  |
| C | -1.04056300 | -0.24027200 | 1.39611300  |
| C | -0.33553900 | 0.12347000  | 0.23272800  |



|    |             |             |             |
|----|-------------|-------------|-------------|
| H  | -1.27833900 | -1.30324100 | 1.47363900  |
| C  | -0.33561500 | -0.80559700 | -0.85576600 |
| H  | -0.83105900 | -1.77384300 | -0.62411900 |
| O  | 0.14440800  | -0.61711100 | -1.98299500 |
| C  | -0.89942500 | 0.46065900  | 2.68488400  |
| C  | -0.67198600 | -0.31129200 | 3.82828500  |
| C  | -0.98415500 | 1.85575900  | 2.81028900  |
| C  | -0.47717100 | 0.29678800  | 5.06633100  |
| H  | -0.59761800 | -1.39114400 | 3.73668500  |
| C  | -0.81267000 | 2.45879400  | 4.04921900  |
| H  | -1.19620900 | 2.46655200  | 1.93754900  |
| C  | -0.54796500 | 1.68119500  | 5.17985800  |
| H  | -0.27087400 | -0.31603900 | 5.93788200  |
| H  | -0.88779200 | 3.53830200  | 4.13776200  |
| H  | -0.40367500 | 2.15778600  | 6.14401200  |
| C  | 0.31296100  | 1.37495800  | 0.05730200  |
| C  | 0.84504100  | 2.46119300  | -0.07285200 |
| C  | 1.53678300  | 3.71072500  | -0.07274300 |
| C  | 2.22453000  | 4.16547000  | -1.20104200 |
| C  | 1.57496600  | 4.48603300  | 1.10228100  |
| C  | 2.96101700  | 5.34555800  | -1.16832900 |
| H  | 2.19148300  | 3.57898800  | -2.11263700 |
| C  | 2.29692600  | 5.66386400  | 1.14106500  |
| H  | 1.04734700  | 4.13741300  | 1.98594300  |
| C  | 3.00118200  | 6.09892700  | 0.00826400  |
| H  | 3.49529400  | 5.66310700  | -2.05602100 |
| H  | 2.34267600  | 6.26599200  | 2.04211100  |
| C  | -3.53484700 | 4.19848700  | -1.06794900 |
| C  | -3.84684800 | 2.85051500  | -0.87567000 |
| C  | -5.10015000 | 2.44082300  | -0.44477500 |
| C  | -6.03738000 | 3.43745400  | -0.18077000 |
| C  | -5.74736100 | 4.78827900  | -0.34575700 |
| C  | -4.48489200 | 5.17359900  | -0.79876200 |
| C  | -2.11986400 | 4.34467700  | -1.58353200 |
| C  | -1.81628000 | 2.94755900  | -2.12775800 |
| C  | -2.60893900 | 2.03043200  | -1.16837300 |
| H  | -5.35455000 | 1.39357200  | -0.30504900 |
| H  | -6.50619500 | 5.53175600  | -0.13140400 |
| H  | -4.26153400 | 6.22517900  | -0.94648000 |
| H  | -2.01164600 | 5.09919800  | -2.36519900 |
| H  | -0.75140100 | 2.68780400  | -2.15108600 |
| H  | -2.02278600 | 1.86840800  | -0.26272500 |
| H  | -1.42093100 | 4.58336000  | -0.77254700 |
| Br | -7.76015300 | 2.93199900  | 0.42808300  |

|   |             |             |             |
|---|-------------|-------------|-------------|
| O | -2.37986000 | 2.86989600  | -3.42844100 |
| C | -2.16872700 | 1.61193900  | -4.02192100 |
| H | -2.67715600 | 1.59648100  | -4.98615400 |
| H | -1.09713600 | 1.41857200  | -4.17600700 |
| N | -2.84530600 | 0.72477600  | -1.78922900 |
| C | -3.23446500 | -0.45658300 | -1.25387900 |
| C | -2.71354200 | 0.53195500  | -3.13748600 |
| N | -3.04391500 | -0.68143800 | -3.47078100 |
| N | -3.36233400 | -1.28354500 | -2.29719500 |
| C | -3.85685300 | -2.63637100 | -2.32471500 |
| C | -3.01494000 | -3.62727000 | -2.82752800 |
| C | -5.16435600 | -2.88166700 | -1.88619000 |
| C | -3.51797500 | -4.92939100 | -2.86467400 |
| C | -5.61327100 | -4.19661100 | -1.95130600 |
| C | -4.80553700 | -5.23274900 | -2.42893500 |
| H | -2.88027200 | -5.72356800 | -3.24475800 |
| H | -6.62375800 | -4.41895400 | -1.61734700 |
| C | -5.32069000 | -6.64803100 | -2.45198600 |
| H | -4.68621000 | -7.29113900 | -3.06477600 |
| H | -5.34549900 | -7.06419200 | -1.44008000 |
| H | -6.33904200 | -6.68814300 | -2.84680700 |
| C | -6.05594000 | -1.79562700 | -1.34337300 |
| H | -5.81342800 | -1.57962600 | -0.29541900 |
| H | -5.96767900 | -0.86823600 | -1.91810200 |
| H | -7.09897700 | -2.11470700 | -1.37786100 |
| C | -1.62629100 | -3.33365600 | -3.33443100 |
| H | -1.65373700 | -3.07685100 | -4.39792000 |
| H | -1.15410800 | -2.49118000 | -2.82141100 |
| H | -0.99654800 | -4.21972300 | -3.22283200 |
| C | -3.79342200 | -0.47210100 | 2.56463200  |
| C | -3.30404700 | 0.01418600  | 1.21993600  |
| H | -3.68883000 | 0.32956600  | 3.30240900  |
| C | -3.33380300 | -0.92526200 | 0.18071300  |
| O | -3.29562100 | -2.16091100 | 0.32737000  |
| C | -5.23839700 | -0.91616700 | 2.44231800  |
| C | -5.57009900 | -2.27245900 | 2.45770100  |
| C | -6.25267100 | 0.02031300  | 2.20789300  |
| C | -6.88530700 | -2.68734800 | 2.25077500  |
| H | -4.78419500 | -3.00531300 | 2.61264500  |
| C | -7.56535600 | -0.39114500 | 1.99626800  |
| H | -6.01174500 | 1.08216400  | 2.17886700  |
| C | -7.88647500 | -1.74848600 | 2.01844000  |
| H | -7.12376900 | -3.74649000 | 2.26279500  |
| H | -8.33574700 | 0.34978900  | 1.80852200  |

|   |             |             |             |
|---|-------------|-------------|-------------|
| H | -8.90982900 | -2.06957300 | 1.85225600  |
| H | -3.43398300 | 1.06796600  | 1.00827500  |
| H | -3.18497600 | -1.31628100 | 2.90951800  |
| O | 3.68387300  | 7.25985200  | 0.14987400  |
| C | 4.40928200  | 7.73613600  | -0.96995100 |
| H | 4.88140200  | 8.66440600  | -0.65285700 |
| H | 5.18027300  | 7.02032000  | -1.27491700 |
| H | 3.74368500  | 7.93479700  | -1.81692900 |
